# Supplementary material for: Comparison of meiotic transcriptomes of three maize inbreds with different origins reveals differences in cell cycle and recombination
Source: BMC Genomics. 2022 Oct 12;23:702. doi: 10.1186/s12864-022-08922-w (PMC9554999; doi:10.1186/s12864-022-08922-w)
Supplement: Supplementary file 2 — Additional file 2: Supplementary Table 1. Percent of aligned reads for the B73, Mo17, and CML228 meiocytes to B73 v5 reference, Mo17 v1 reference, and CML228 v1 reference. Supplementary Table 2. Genes that had a reads per kilobase million (RPKM) value greater than 2 and were present in B73, Mo17, and CML228 meiocytes aligned to each of their corresponsive genomes (the B73 v5 reference, Mo17 v1 reference, and the CML228 v1 reference). Values shown for each sample were Z-scores, indicating levels of gene expression. Supplementary Table 3. Common meiosis-related genes detected in temperate maize lines B73 and Mo17 and the tropical maize line CML228 male meiocytes. Values shown for each sample were Z-scores, indicating levels of gene expression. Supplementary Table 4. Significantly differentially expressed genes in "cell cycle" gene ontology category: their expression levels (shown in Z-scores) and functions. Supplementary Table 5. Genes that had a reads per kilobase million (RPKM) value greater than 2 of B73, Mo17, and CML228 meiocytes aligned to the B73 v5 reference genome. Values shown for each sample were Z-scores, indicating levels of gene expression. Supplementary Table 6. Genes that had a reads per kilobase million (RPKM) value greater than 2 of B73, Mo17, and CML228 meiocytes aligned to the Mo17 v1 reference genome. Values shown for each sample were Z-scores, indicating levels of gene expression. Supplementary Table 7. Genes that had a reads per kilobase million (RPKM) value greater than 2 of B73, Mo17, and CML228 meiocytes aligned to the CML228 v1 reference genome. Values shown for each sample were Z-scores, indicating levels of gene expression. [file 12864_2022_8922_MOESM2_ESM.xlsx]

## Sheet: SupplementaryTable1
Supplementary Table 1. Percent of aligned reads for the B73, Mo17, and CML228 meiocytes to B73 v5 reference, Mo17 v1 reference, and CML228 v1 reference.
Reference genome	Statistics	B73_M1	B73_M2	Mo17_M1	Mo17_M2	CML228_M1	CML228_M2	CML228_M3
		SRR650380	SRR650383	SRR5931450	SRR5931453	SRR5930250	SRR14498234	SRR14498235
	Total # of reads	43308869	76035676	18684582	14857750	57615994	49512794	42815488
B73 v5	# aligned	37280478	70204286	16981921	13050405	40180437	39073053	37075339
	% aligned	86.0805	92.3307	90.8873	87.8357	69.7383	78.9151	86.5933
	# aligned (unique)	29571545	63343663	15070499	11530964	34232102	33576936	31857123
	% aligned (unique)	68.28	83.31	80.66	77.61	59.41	67.81	74.41
Mo17 v1	# aligned	34591658	67906416	17272858	13212798	39114949	38449591	36646320
	% aligned	79.872	89.3086	92.4444	88.9287	67.889	77.6559	85.5913
	# aligned (unique)	29620524	60457820	15504526	11897021	34859136	33754206	32242457
	% aligned (unique)	68.3937	79.5124	82.9803	80.0728	60.5025	68.1727	75.3056
CML228 v1	# aligned	36509799	68611793	16957396	13034755	40804951	39530812	37593693
	% aligned	84.301	90.2363	90.7561	87.7303	70.8223	79.8396	87.804
	# aligned (unique)	27800671	59886050	14751972	11296140	34595450	33880224	32199463
	% aligned (unique)	64.19	78.76	78.95	76.03	60.04	68.4272	75.21

## Sheet: SupplementaryTable2
Supplementary Table 2. Genes that had a reads per kilobase million (RPKM) value greater than 2 and were present in B73, Mo17, and CML228 meiocytes aligned to each of their corresponsive genomes (the B73 v5 reference, Mo17 v1 reference, and the CML228 v1 reference). Values shown for each sample were Z-scores, indicating levels of gene expression.
								CML228			Mo17		B73
Gene ID	Base mean	log2(FC)	StdErr	Wald-Stats	P-value (unadjusted)	FDR	Diff exp?	SRR5930250	SRR14498235	SRR14498234	SRR5931453	SRR5931450	SRR650380	SRR650383
Zm00001eb063810	4201.54	-10.2989	0.54766	-18.8053	6.83407e-79	1.21177e-75	TRUE	0.529517	1.33948	1.21489	-0.903296	-0.903296	-0.668659	-0.60864
Zm00001eb154700	1069.29	-9.62994	0.678363	-14.1958	9.72046e-46	3.44712e-43	TRUE	1.2397	0.897755	1.05398	-0.797858	-0.797858	-0.797858	-0.797858
Zm00001eb072210	1528.57	-9.1549	0.646435	-14.1621	1.57118e-45	5.43589e-43	TRUE	0.023339	1.3716	1.44821	-0.710916	-0.711917	-0.71025	-0.710061
Zm00001eb217080	2134.67	-8.84775	0.600089	-14.7441	3.35967e-49	1.40167e-46	TRUE	2.05553	0.12859	0.249809	-0.839361	-0.839361	-0.406358	-0.348846
Zm00001eb083590	486.81	-8.58462	0.705044	-12.176	4.17188e-34	6.4324e-32	TRUE	0.783202	0.889192	1.46253	-0.783731	-0.783731	-0.783731	-0.783731
Zm00001eb150370	1317.4	-8.46887	0.571472	-14.8194	1.09801e-49	4.86729e-47	TRUE	0.420458	0.645204	1.57871	-1.19539	-1.19539	-0.237558	-0.016042
Zm00001eb000080	1982.38	-8.35186	0.606514	-13.7703	3.84749e-43	1.11381e-40	TRUE	1.27342	0.148499	0.848036	-1.16478	-1.16478	-0.64915	0.708761
Zm00001eb351280	1309.84	-8.29912	0.568554	-14.5969	2.93907e-48	1.19116e-45	TRUE	1.09146	0.743386	0.4183	-1.35655	-1.35655	-0.15399	0.613956
Zm00001eb149030	857.742	-8.02913	0.582843	-13.7758	3.56347e-43	1.05308e-40	TRUE	0.843371	0.78347	1.24718	-1.20212	-1.20212	-0.478715	0.008936
Zm00001eb349960	526.013	-8.00714	0.629835	-12.7131	5.00308e-37	9.9956e-35	TRUE	1.64713	0.730264	0.662227	-0.796278	-0.796278	-0.724505	-0.722563
Zm00001eb300750	1032.99	-7.9867	0.580793	-13.7514	4.99708e-43	1.38987e-40	TRUE	0.350004	0.777794	1.16073	-1.32539	-1.32539	-0.234995	0.597248
Zm00001eb290370	1286.77	-7.96369	0.571265	-13.9405	3.59624e-44	1.13362e-41	TRUE	-0.220141	0.585912	0.78231	-1.36677	-1.36677	0.75214	0.833315
Zm00001eb055970	1031.48	-7.90588	0.607451	-13.0149	1.00731e-38	2.16495e-36	TRUE	-0.16438	1.1869	1.44101	-1.08844	-1.08844	-0.339873	0.053221
Zm00001eb417320	619.905	-7.85507	0.589754	-13.3192	1.78936e-40	4.23035e-38	TRUE	0.64032	1.28575	1.1194	-1.06101	-1.06101	-0.407221	-0.516234
Zm00001eb352680	340.864	-7.8251	0.738751	-10.5923	3.23409e-26	2.97893e-24	TRUE	1.96607	0.34983	0.403783	-0.67992	-0.67992	-0.67992	-0.67992
Zm00001eb431700	605.732	-7.67374	0.584788	-13.1223	2.4549e-39	5.44105e-37	TRUE	0.655756	1.04728	1.16685	-1.22453	-1.22453	-0.320311	-0.100516
Zm00001eb232110	1450.01	-7.62901	0.578496	-13.1877	1.03325e-39	2.36398e-37	TRUE	0.034786	-0.069283	-0.057994	-1.04299	-1.04299	0.240076	1.93839
Zm00001eb108850	487.094	-7.49054	0.700238	-10.6971	1.04965e-26	1.00604e-24	TRUE	0.016749	0.696704	1.93798	-0.675702	-0.675702	-0.635991	-0.664034
Zm00001eb272850	790.898	-7.4502	0.598475	-12.4487	1.42226e-35	2.4307e-33	TRUE	1.29066	0.205212	0.261989	-1.29434	-1.29434	-0.098248	0.929063
Zm00001eb140980	718.154	-7.30153	0.616817	-11.8374	2.4998e-32	3.58178e-30	TRUE	1.49965	0.091134	0.439639	-1.19975	-1.19975	-0.364342	0.733429
Zm00001eb184070	551.814	-7.25215	0.588582	-12.3214	6.94827e-35	1.10743e-32	TRUE	1.04492	0.280869	0.749272	-1.40253	-1.40253	0.54831	0.181691
Zm00001eb276280	355.662	-7.20422	0.678853	-10.6123	2.61123e-26	2.453e-24	TRUE	0.480002	1.12044	1.46691	-0.806294	-0.806294	-0.682586	-0.772173
Zm00001eb139450	1036.56	-7.10576	0.581115	-12.2278	2.20798e-34	3.44178e-32	TRUE	-0.480059	-0.111815	0.087537	-1.05868	-1.05868	1.12222	1.49947
Zm00001eb078920	78236.8	-7.0917	0.515626	-13.7536	4.84712e-43	1.37513e-40	TRUE	-0.247677	1.19783	1.66966	-0.662566	-0.661729	-0.643046	-0.652469
Zm00001eb139260	264.907	-6.95929	0.646754	-10.7603	5.29772e-27	5.25511e-25	TRUE	0.676551	0.781967	1.60679	-0.764489	-0.765803	-0.768138	-0.766877
Zm00001eb140700	450.622	-6.90111	0.6278	-10.9925	4.15164e-28	4.46144e-26	TRUE	1.4133	0.193161	0.779498	-1.20455	-1.20455	-0.465652	0.488795
Zm00001eb208170	2657.52	-6.8117	0.461876	-14.7479	3.17378e-49	1.36425e-46	TRUE	1.25084	1.10802	0.822699	-0.781828	-0.79681	-0.801931	-0.800995
Zm00001eb136500	250.713	-6.66292	0.614192	-10.8483	2.03266e-27	2.05952e-25	TRUE	0.927716	1.54503	0.611067	-0.788365	-0.789799	-0.749784	-0.755868
Zm00001eb315640	2982.07	-6.6511	0.615853	-10.7998	3.44885e-27	3.44521e-25	TRUE	-0.27396	1.631	1.25066	-0.665186	-0.656954	-0.631744	-0.653816
Zm00001eb015770	345.236	-6.64163	0.729787	-9.10078	8.96869e-20	4.62621e-18	TRUE	-0.176041	1.63049	1.22729	-0.698446	-0.698446	-0.602526	-0.682325
Zm00001eb098770	6276.55	-6.56285	0.352937	-18.595	3.5304e-77	5.56431e-74	TRUE	0.66657	0.745435	1.16966	-1.28388	-1.28181	-0.420534	0.404559
Zm00001eb336670	437.519	-6.55908	0.590642	-11.105	1.18609e-28	1.34598e-26	TRUE	-0.034731	0.085448	0.291368	-1.29241	-1.29241	0.961659	1.28108
Zm00001eb418250	194.655	-6.55452	0.701025	-9.34991	8.7721e-21	4.99728e-19	TRUE	1.89191	0.484775	0.440714	-0.740835	-0.740835	-0.638696	-0.69703
Zm00001eb319310	102.39	-6.51605	0.764543	-8.5228	1.55739e-17	6.53596e-16	TRUE	1.52979	0.791244	0.786789	-0.776956	-0.776956	-0.776956	-0.776956
Zm00001eb118770	166.345	-6.36453	0.650792	-9.77966	1.37671e-22	9.38873e-21	TRUE	1.36016	0.706411	1.04072	-0.972537	-0.972537	-0.601199	-0.561021
Zm00001eb308640	84.735	-6.30108	0.76963	-8.18716	2.67464e-16	9.4613e-15	TRUE	1.27359	0.880883	1.03161	-0.796522	-0.796522	-0.796522	-0.796522
Zm00001eb223530	215.94	-6.18987	0.662002	-9.35022	8.74617e-21	4.99728e-19	TRUE	-0.066518	1.28641	1.41321	-1.03677	-1.03677	-0.143409	-0.416152
Zm00001eb309090	239.315	-6.18508	0.649548	-9.52212	1.69675e-21	1.03743e-19	TRUE	1.12954	0.515464	0.853264	-1.25256	-1.25256	-0.540877	0.547735
Zm00001eb340290	206.696	-6.09072	0.700834	-8.69067	3.60303e-18	1.60216e-16	TRUE	-0.119578	1.40547	1.42559	-0.833453	-0.833453	-0.375346	-0.669232
Zm00001eb019530	13301	-6.08014	0.397791	-15.2848	9.65913e-53	5.07462e-50	TRUE	0.210869	0.991797	1.69492	-0.724238	-0.732476	-0.71656	-0.72431
Zm00001eb080500	772.312	-5.99612	0.608496	-9.85401	6.58605e-23	4.60223e-21	TRUE	-0.189891	-0.482844	-0.458055	-0.777972	-0.777972	0.751239	1.9355
Zm00001eb158290	1922.14	-5.98352	0.474132	-12.62	1.63915e-36	3.14207e-34	TRUE	-0.053635	0.983534	1.78339	-0.723785	-0.72649	-0.626718	-0.636297
Zm00001eb328700	97.3157	-5.95376	0.786338	-7.57149	3.68958e-14	1.05945e-12	TRUE	2.09162	0.115254	0.272926	-0.621362	-0.621362	-0.621362	-0.615709
Zm00001eb393470	145.42	-5.95265	0.769915	-7.73157	1.0623e-14	3.26162e-13	TRUE	-0.282849	2.08347	0.502579	-0.585209	-0.585209	-0.563609	-0.569176
Zm00001eb013830	170.978	-5.9448	0.708512	-8.39054	4.83907e-17	1.88578e-15	TRUE	-0.187357	0.724117	1.95686	-0.742159	-0.742159	-0.516943	-0.492359
Zm00001eb033220	1128.1	-5.91925	0.473801	-12.4931	8.13836e-36	1.44303e-33	TRUE	0.029548	1.14603	1.55531	-0.973313	-0.978101	-0.218046	-0.561425
Zm00001eb153990	244.653	-5.89806	0.615921	-9.576	1.00872e-21	6.38779e-20	TRUE	0.043144	1.56227	1.07612	-1.03454	-1.03646	-0.12016	-0.490369
Zm00001eb022950	231.206	-5.82087	0.605061	-9.6203	6.5638e-22	4.23216e-20	TRUE	0.452496	0.760849	1.73989	-0.765946	-0.795522	-0.672403	-0.719364
Zm00001eb134870	90.2961	-5.77476	0.761178	-7.58661	3.28389e-14	9.48718e-13	TRUE	-0.064713	1.38757	1.4605	-0.708043	-0.708043	-0.687	-0.680274
Zm00001eb214040	907.7	-5.77133	0.477871	-12.0772	1.39451e-33	2.08222e-31	TRUE	0.464707	-0.000777	0.053441	-1.30964	-1.28025	0.662542	1.40998
Zm00001eb330460	4003.7	-5.62945	0.421247	-13.3638	9.8469e-41	2.36743e-38	TRUE	0.553527	1.07545	1.46076	-0.815826	-0.832406	-0.667095	-0.774409
Zm00001eb358450	6862.33	-5.62607	0.271314	-20.7363	1.62883e-95	7.70167e-92	TRUE	0.910821	0.742184	1.42547	-0.999206	-1.00461	-0.501972	-0.572688
Zm00001eb323060	97.9454	-5.62194	0.720557	-7.80222	6.08286e-15	1.90475e-13	TRUE	1.00307	0.444011	1.57217	-0.845264	-0.845264	-0.582781	-0.745936
Zm00001eb284040	1722.88	-5.6171	0.352673	-15.9272	4.10024e-57	2.64372e-54	TRUE	0.548646	0.914978	1.59051	-0.759155	-0.757021	-0.767549	-0.770414
Zm00001eb028220	1883.78	-5.60607	0.387759	-14.4576	2.2451e-47	8.60722e-45	TRUE	0.993596	0.53438	0.979215	-1.29541	-1.31439	-0.371417	0.474022
Zm00001eb159770	114.721	-5.59636	0.672624	-8.32019	8.7821e-17	3.33086e-15	TRUE	1.53656	0.637513	0.673137	-1.13295	-1.13295	-0.143483	-0.437831
Zm00001eb400520	169.817	-5.53608	0.574093	-9.64317	5.25409e-22	3.40316e-20	TRUE	0.665936	0.918077	1.51079	-0.866102	-0.870832	-0.659225	-0.698647
Zm00001eb382430	2891.73	-5.52944	0.379697	-14.5628	4.84627e-48	1.90957e-45	TRUE	0.270464	0.460592	0.869216	-1.32822	-1.3367	-0.116327	1.18097
Zm00001eb345080	390.431	-5.50385	0.505836	-10.8807	1.42441e-27	1.47484e-25	TRUE	0.715228	0.391671	1.01744	-1.38846	-1.44409	0.220214	0.487993
Zm00001eb172310	2256.87	-5.50147	0.472206	-11.6506	2.27897e-31	3.10839e-29	TRUE	0.173807	1.00677	1.69824	-0.718944	-0.720435	-0.70712	-0.732311
Zm00001eb240250	2441.08	-5.45079	0.511373	-10.6591	1.58084e-26	1.50498e-24	TRUE	0.096811	1.3621	1.4295	-0.755222	-0.740396	-0.655415	-0.737379
Zm00001eb295980	1757.9	-5.45054	0.314041	-17.3562	1.77147e-67	1.67522e-64	TRUE	0.882647	0.680676	1.4569	-1.04973	-1.05479	-0.483217	-0.432479
Zm00001eb003550	2868.36	-5.41121	0.32314	-16.7457	6.08629e-63	4.79633e-60	TRUE	1.11624	0.555484	0.189463	-1.39683	-1.40941	0.359757	0.585299
Zm00001eb407160	6770.97	-5.39719	0.292829	-18.4312	7.38415e-76	1.04744e-72	TRUE	0.687748	0.958451	1.45191	-0.9251	-0.939172	-0.642386	-0.591452
Zm00001eb352810	117.553	-5.32109	0.647268	-8.22084	2.02076e-16	7.25682e-15	TRUE	0.91143	1.24166	1.01481	-0.916548	-0.920137	-0.777311	-0.553905
Zm00001eb392010	221.552	-5.29144	0.580039	-9.12256	7.33709e-20	3.84047e-18	TRUE	1.18481	0.093288	0.353375	-1.37872	-1.34704	0.274657	0.819633
Zm00001eb190460	96.4791	-5.27472	0.704618	-7.48593	7.10449e-14	1.97216e-12	TRUE	0.487426	0.920326	1.48106	-1.06179	-1.06179	-0.677829	-0.087409
Zm00001eb219100	564.901	-5.2567	0.514379	-10.2195	1.62173e-24	1.30706e-22	TRUE	1.92095	-0.022071	0.725741	-0.782007	-0.775054	-0.552381	-0.515176
Zm00001eb143080	2401.44	-5.242	0.306493	-17.1032	1.40577e-65	1.2463e-62	TRUE	1.36294	0.584966	0.892337	-1.21527	-1.19737	-0.245087	-0.182513
Zm00001eb413110	557.564	-5.18096	0.577977	-8.96394	3.13268e-19	1.55296e-17	TRUE	1.64151	0.45675	0.740246	-1.03963	-1.09893	-0.437748	-0.262197
Zm00001eb124500	536.343	-5.15137	0.540971	-9.52244	1.69155e-21	1.03743e-19	TRUE	1.07451	0.159901	0.001815	-1.32638	-1.38174	0.920567	0.551324
Zm00001eb103220	409.744	-5.1385	0.513036	-10.0159	1.29825e-23	9.49265e-22	TRUE	1.22278	0.103051	0.60166	-1.30611	-1.35201	-0.041773	0.772402
Zm00001eb093800	951.864	-5.10994	0.404077	-12.646	1.1778e-36	2.32042e-34	TRUE	0.864647	1.02388	1.29208	-0.815651	-0.826348	-0.732146	-0.806469
Zm00001eb353050	10907	-5.09521	0.298765	-17.0542	3.25099e-65	2.71267e-62	TRUE	0.949043	0.728885	1.0185	-1.2811	-1.28822	-0.396629	0.269522
Zm00001eb123750	1598.95	-5.07184	0.54223	-9.35367	8.46552e-21	4.86167e-19	TRUE	-0.346241	1.14584	1.66033	-0.851617	-0.847312	-0.183346	-0.57765
Zm00001eb362290	73.2783	-5.06537	0.805601	-6.28769	3.22232e-10	5.50705e-09	TRUE	-0.339924	1.85041	0.963864	-0.629058	-0.629058	-0.621379	-0.594856
Zm00001eb096500	851.443	-5.04924	0.365541	-13.8131	2.12634e-43	6.41747e-41	TRUE	0.433364	0.767298	1.31608	-1.33181	-1.30771	0.062351	0.060433
Zm00001eb349430	13710.5	-5.0113	0.336557	-14.8899	3.83314e-50	1.75397e-47	TRUE	0.725016	0.669485	1.39298	-1.18073	-1.17801	-0.539962	0.111215
Zm00001eb227970	158.839	-4.98963	0.596007	-8.37176	5.67633e-17	2.19997e-15	TRUE	0.710785	0.520215	1.73396	-0.787231	-0.814487	-0.630717	-0.732531
Zm00001eb138250	282.317	-4.93637	0.599096	-8.23969	1.72653e-16	6.27971e-15	TRUE	-0.166572	1.05112	1.7524	-0.789722	-0.758546	-0.593564	-0.495111
Zm00001eb203450	812.968	-4.9355	0.408357	-12.0863	1.24853e-33	1.88408e-31	TRUE	0.864097	0.673915	1.20368	-1.31822	-1.25616	0.018059	-0.185362
Zm00001eb333980	2930.35	-4.93175	0.301875	-16.3371	5.37747e-60	3.81397e-57	TRUE	0.569588	0.167751	0.159526	-1.3619	-1.37722	0.626579	1.21568
Zm00001eb309880	1310.06	-4.9123	0.394948	-12.4379	1.62816e-35	2.71711e-33	TRUE	0.238603	1.15386	1.42406	-1.06895	-1.06235	-0.53972	-0.145516
Zm00001eb151410	34.3604	-4.90919	0.818108	-6.00065	1.96526e-09	2.96206e-08	TRUE	1.29527	1.13768	0.728034	-0.790244	-0.790244	-0.790244	-0.790244
Zm00001eb148530	3188.37	-4.89078	0.31553	-15.5002	3.4585e-54	1.88688e-51	TRUE	0.319115	0.362977	0.096504	-1.35518	-1.38452	1.18143	0.779677
Zm00001eb211360	423.1	-4.874	0.652849	-7.46574	8.28348e-14	2.26836e-12	TRUE	-0.510367	1.22078	1.53397	-0.870828	-0.892066	0.095521	-0.577002
Zm00001eb206030	1629.22	-4.81412	0.372851	-12.9116	3.86994e-38	8.07281e-36	TRUE	1.60545	0.414252	0.485091	-1.23687	-1.20506	-0.157201	0.094328
Zm00001eb134400	3710	-4.80183	0.307275	-15.6271	4.75693e-55	2.69908e-52	TRUE	0.563268	1.13731	1.35219	-0.988632	-1.01358	-0.571394	-0.479158
Zm00001eb386040	8487.12	-4.79794	0.269107	-17.8291	4.201e-71	4.25652e-68	TRUE	1.27864	0.577673	1.24923	-0.90081	-0.896278	-0.654367	-0.654087
Zm00001eb228030	326.232	-4.79661	0.851313	-5.63437	1.75698e-08	2.25954e-07	TRUE	-0.050138	0.321619	2.11445	-0.596482	-0.596482	-0.596482	-0.596482
Zm00001eb051480	127.596	-4.79314	0.606216	-7.90666	2.64378e-15	8.5426e-14	TRUE	0.67506	0.325296	1.78122	-0.963818	-1.00161	-0.424406	-0.391743
Zm00001eb077220	2587.21	-4.78638	0.506665	-9.44683	3.49234e-21	2.09911e-19	TRUE	-0.059957	1.31965	1.52263	-0.724245	-0.680366	-0.692541	-0.685177
Zm00001eb014140	1011.95	-4.76149	0.560532	-8.49459	1.98636e-17	8.14349e-16	TRUE	0.164978	0.572788	1.95492	-0.708578	-0.69409	-0.585623	-0.704398
Zm00001eb072630	91.6976	-4.75293	0.706778	-6.72478	1.75856e-11	3.61001e-10	TRUE	0.053864	0.890344	1.81565	-0.714124	-0.704194	-0.63852	-0.703019
Zm00001eb305790	247.069	-4.75252	0.643673	-7.38344	1.54252e-13	4.0975e-12	TRUE	-0.569759	-0.229264	-0.382994	-0.835527	-0.835527	1.49692	1.35615
Zm00001eb247090	269.788	-4.71624	0.495879	-9.51086	1.89101e-21	1.14633e-19	TRUE	1.64018	0.645108	0.758873	-0.765202	-0.737895	-0.782292	-0.758776
Zm00001eb406900	489.724	-4.70473	0.373657	-12.591	2.36612e-36	4.47512e-34	TRUE	0.896106	0.742359	1.3227	-1.14418	-1.17514	-0.308949	-0.332892
Zm00001eb029520	6211.29	-4.66958	0.57048	-8.18535	2.71516e-16	9.58072e-15	TRUE	-0.694805	0.989604	1.60079	-0.969021	-0.986738	-0.14448	0.204655
Zm00001eb357910	299.005	-4.60474	0.525412	-8.76406	1.88344e-18	8.73093e-17	TRUE	0.134159	0.924464	1.76051	-0.817527	-0.780619	-0.561311	-0.659678
Zm00001eb083980	334.295	-4.59947	0.658191	-6.98804	2.78743e-12	6.23655e-11	TRUE	-0.412114	0.513809	1.11871	-1.05709	-1.0995	1.34845	-0.412272
Zm00001eb341670	2948.34	-4.5749	0.401874	-11.3839	5.02815e-30	6.36824e-28	TRUE	-0.121252	0.880916	1.52701	-1.21531	-1.18007	0.086503	0.022212
Zm00001eb351790	478.173	-4.55831	0.622048	-7.32792	2.33758e-13	6.03981e-12	TRUE	0.633232	-0.125819	1.99892	-0.717435	-0.65971	-0.560065	-0.569123
Zm00001eb180920	2414.44	-4.55231	0.301687	-15.0895	1.89931e-51	9.29023e-49	TRUE	0.554527	0.799919	1.05532	-1.35559	-1.38271	-0.095975	0.424507
Zm00001eb049810	2715.03	-4.52721	0.414019	-10.9348	7.85922e-28	8.258e-26	TRUE	1.84116	0.181451	0.418936	-1.06476	-1.10907	-0.166348	-0.101363
Zm00001eb367730	766.4	-4.51611	0.334815	-13.4884	1.83081e-41	4.72183e-39	TRUE	0.496367	1.23204	0.905267	-1.31344	-1.29904	-0.051526	0.030333
Zm00001eb025650	110.094	-4.50151	0.721022	-6.24324	4.28599e-10	7.1779e-09	TRUE	-0.315808	1.09278	1.68862	-0.832345	-0.866159	-0.141244	-0.625845
Zm00001eb177920	696.392	-4.49735	0.357854	-12.5676	3.18429e-36	5.94332e-34	TRUE	0.472326	0.581793	0.659427	-1.47395	-1.42535	0.812459	0.373293
Zm00001eb029770	729.089	-4.47885	0.501869	-8.92435	4.48338e-19	2.20058e-17	TRUE	0.190648	1.04648	1.66261	-0.732723	-0.721975	-0.690532	-0.75451
Zm00001eb266300	2273.28	-4.4564	0.292637	-15.2284	2.29003e-52	1.16015e-49	TRUE	0.567992	0.405777	0.945734	-1.41931	-1.45168	0.623802	0.327684
Zm00001eb002860	162.851	-4.45326	0.675119	-6.59626	4.21672e-11	8.12693e-10	TRUE	-0.346728	1.04443	1.61381	-0.954857	-0.927292	0.185801	-0.615163
Zm00001eb260740	124.24	-4.45183	0.659645	-6.74883	1.49046e-11	3.09097e-10	TRUE	1.89125	0.238345	0.651329	-0.690494	-0.770453	-0.642861	-0.677116
Zm00001eb373770	317.173	-4.43998	0.659414	-6.73323	1.65942e-11	3.41962e-10	TRUE	0.166942	0.469276	2.00146	-0.723546	-0.64999	-0.609265	-0.654875
Zm00001eb395330	33679.1	-4.42799	0.556794	-7.95266	1.82545e-15	5.96637e-14	TRUE	0.453771	0.752039	1.74346	-0.758306	-0.762526	-0.792298	-0.636138
Zm00001eb215030	73.1795	-4.40951	0.761452	-5.79092	7.00006e-09	9.60308e-08	TRUE	2.10316	-0.333433	0.207778	-0.812784	-0.812784	-0.315997	-0.035936
Zm00001eb122360	570.68	-4.40935	0.560823	-7.86228	3.77195e-15	1.19698e-13	TRUE	-0.240572	1.21715	1.65253	-0.676585	-0.662157	-0.621777	-0.668583
Zm00001eb213000	1840.07	-4.38863	0.328394	-13.3639	9.82595e-41	2.36743e-38	TRUE	0.791182	0.471958	0.964783	-1.36014	-1.36673	-0.185321	0.684263
Zm00001eb221050	842.202	-4.38361	0.390646	-11.2214	3.20004e-29	3.78272e-27	TRUE	1.73662	0.600279	0.638997	-0.715334	-0.738234	-0.755242	-0.767085
Zm00001eb083050	1783.9	-4.33435	0.508101	-8.53047	1.45751e-17	6.17157e-16	TRUE	0.520852	1.30251	1.27557	-0.801726	-0.733502	-0.752229	-0.811468
Zm00001eb394550	75.746	-4.33343	0.704765	-6.14875	7.80945e-10	1.23912e-08	TRUE	-0.117276	0.88688	1.86222	-0.659658	-0.668004	-0.649784	-0.654381
Zm00001eb275820	453.74	-4.32036	0.459607	-9.4001	5.45106e-21	3.23528e-19	TRUE	1.70336	0.490762	0.682116	-0.958935	-1.03591	-0.516033	-0.365355
Zm00001eb240210	3867.18	-4.29716	0.271069	-15.8527	1.34751e-56	8.31063e-54	TRUE	1.00472	0.574119	1.11841	-1.28696	-1.32286	-0.042486	-0.044941
Zm00001eb343200	1718.15	-4.29552	0.4193	-10.2445	1.25278e-24	1.02721e-22	TRUE	0.072157	1.1573	1.6201	-0.691585	-0.708887	-0.72188	-0.7272
Zm00001eb294930	891.932	-4.26715	0.389997	-10.9415	7.29725e-28	7.72474e-26	TRUE	0.045761	0.392554	1.49403	-1.29835	-1.29219	0.188377	0.469818
Zm00001eb088800	134.451	-4.25932	0.561691	-7.58304	3.37544e-14	9.73183e-13	TRUE	0.488196	0.903159	1.62905	-0.819327	-0.773693	-0.671636	-0.755752
Zm00001eb335740	612.8	-4.2482	0.395873	-10.7312	7.26189e-27	7.10413e-25	TRUE	0.248256	0.898231	1.23231	-1.29713	-1.36402	0.018706	0.263653
Zm00001eb086870	285.095	-4.24769	0.420435	-10.1031	5.3539e-24	4.12745e-22	TRUE	0.623756	1.02937	1.45881	-0.745794	-0.765788	-0.798653	-0.801698
Zm00001eb145560	767.243	-4.23219	0.376166	-11.2509	2.29314e-29	2.75662e-27	TRUE	1.26969	0.258751	0.993335	-1.25448	-1.30179	-0.163345	0.197842
Zm00001eb342750	70.22	-4.22647	0.776389	-5.44376	5.21674e-08	6.17176e-07	TRUE	-0.621968	1.43304	1.38216	-0.882435	-0.882435	-0.207926	-0.220429
Zm00001eb308510	28.0025	-4.20052	0.844031	-4.97674	6.46634e-07	6.16431e-06	TRUE	-0.154085	1.18192	1.66377	-0.672902	-0.672902	-0.672902	-0.672902
Zm00001eb013590	599.11	-4.19405	0.385809	-10.8708	1.58816e-27	1.62072e-25	TRUE	0.523139	0.904377	1.42155	-1.13526	-1.20369	-0.354678	-0.155437
Zm00001eb154190	49.1588	-4.19088	0.74665	-5.61291	1.98951e-08	2.53105e-07	TRUE	0.022452	1.21674	1.15987	-1.18588	-1.18588	0.411048	-0.438348
Zm00001eb163400	183.218	-4.17013	0.47818	-8.72084	2.76135e-18	1.25143e-16	TRUE	0.965293	0.520697	0.650506	-1.41909	-1.42372	0.148599	0.557716
Zm00001eb369310	6744.33	-4.15227	0.316004	-13.1399	1.94393e-39	4.37693e-37	TRUE	0.754174	0.486641	1.08937	-1.32518	-1.34495	-0.268718	0.608658
Zm00001eb330610	7430.65	-4.14962	0.49377	-8.40395	4.31721e-17	1.69639e-15	TRUE	-0.027536	0.868373	1.85214	-0.647867	-0.671349	-0.668026	-0.705732
Zm00001eb364590	1002.73	-4.12158	0.440916	-9.34776	8.95227e-21	5.07952e-19	TRUE	0.120994	0.616183	1.77009	-1.06115	-1.13693	-0.099805	-0.20939
Zm00001eb294660	468.304	-4.11735	0.465699	-8.84122	9.46792e-19	4.53724e-17	TRUE	0.042434	0.868844	1.7949	-0.880342	-0.892026	-0.380495	-0.553314
Zm00001eb310410	610.331	-4.1143	0.389896	-10.5523	4.95604e-26	4.4778e-24	TRUE	0.686658	0.890988	1.18766	-1.22231	-1.30857	-0.329633	0.095209
Zm00001eb327260	723.472	-4.10826	0.481833	-8.52631	1.51085e-17	6.3784e-16	TRUE	0.858234	-0.34046	1.47533	-1.23149	-1.16678	0.128712	0.276455
Zm00001eb244220	1757.46	-4.10736	0.319868	-12.8408	9.68523e-38	1.96264e-35	TRUE	0.968668	0.055448	0.197869	-1.38451	-1.37536	0.649701	0.888181
Zm00001eb052610	1059.46	-4.0972	0.376887	-10.8712	1.58148e-27	1.62072e-25	TRUE	0.207065	0.9327	1.62199	-1.0694	-1.04178	-0.414168	-0.236395
Zm00001eb232020	1869.53	-4.09674	0.293795	-13.9442	3.41157e-44	1.09984e-41	TRUE	0.201128	0.127128	0.609798	-1.36892	-1.37315	0.598006	1.20601
Zm00001eb100890	348.46	-4.05925	0.406436	-9.98743	1.73017e-23	1.24769e-21	TRUE	1.42425	0.690283	0.993292	-0.890932	-0.960504	-0.665603	-0.590789
Zm00001eb079640	436.555	-4.0588	0.411893	-9.85401	6.5862e-23	4.60223e-21	TRUE	1.50515	0.489769	0.78227	-1.14522	-1.15399	-0.489245	0.011267
Zm00001eb109740	18690	-4.05011	0.247879	-16.3391	5.20437e-60	3.81397e-57	TRUE	1.31114	0.610538	1.09848	-1.08509	-1.07326	-0.451098	-0.410716
Zm00001eb100250	2586.56	-4.02016	0.323439	-12.4294	1.80919e-35	2.98411e-33	TRUE	0.94322	0.795753	1.41153	-0.798458	-0.801529	-0.738731	-0.811783
Zm00001eb344070	261.66	-4.01299	0.539595	-7.43705	1.0296e-13	2.78718e-12	TRUE	0.651156	0.367358	0.749157	-1.36591	-1.51926	0.760679	0.356818
Zm00001eb175460	362.205	-3.99657	0.637778	-6.2664	3.69499e-10	6.25459e-09	TRUE	1.37607	-0.112653	-0.153677	-1.15137	-1.2476	0.222184	1.06705
Zm00001eb269300	145.307	-3.99525	0.67382	-5.92925	3.04314e-09	4.43648e-08	TRUE	2.02669	0.366919	0.215836	-0.730588	-0.628197	-0.604649	-0.646009
Zm00001eb062000	5507.34	-3.98705	0.291456	-13.6797	1.34156e-42	3.65962e-40	TRUE	1.22554	0.652906	1.22218	-0.959196	-0.988625	-0.666281	-0.486515
Zm00001eb235230	372.912	-3.98508	0.411259	-9.68995	3.32689e-22	2.19497e-20	TRUE	0.891515	0.190712	0.323277	-1.38251	-1.39059	0.306897	1.06069
Zm00001eb140050	1549.22	-3.98033	0.468168	-8.50191	1.86493e-17	7.71253e-16	TRUE	-0.326727	0.754359	1.21389	-1.16742	-1.21151	0.980332	-0.242929
Zm00001eb148100	1064.29	-3.95936	0.32377	-12.2289	2.17758e-34	3.4321e-32	TRUE	0.824725	0.860817	1.39316	-0.994619	-1.05302	-0.579815	-0.451246
Zm00001eb011880	22482	-3.94882	0.431545	-9.15043	5.67077e-20	3.00149e-18	TRUE	0.445248	0.424917	1.80109	-0.977028	-0.971104	-0.691869	-0.031251
Zm00001eb157590	417.295	-3.94103	0.492373	-8.00415	1.20296e-15	4.0436e-14	TRUE	-0.533825	0.04625	0.57482	-1.14135	-1.1656	0.750933	1.46877
Zm00001eb351340	7905.84	-3.93591	0.446349	-8.818	1.16522e-18	5.54654e-17	TRUE	0.974672	0.247821	1.16408	-1.16768	-1.15598	-0.714011	0.651106
Zm00001eb024800	19595.5	-3.93239	0.301577	-13.0394	7.29977e-39	1.59303e-36	TRUE	1.61303	0.491807	0.850964	-0.974473	-0.991262	-0.565028	-0.425041
Zm00001eb059100	1501.9	-3.92539	0.472254	-8.31202	9.40836e-17	3.54941e-15	TRUE	0.697871	0.480271	1.03647	-1.29076	-1.42631	-0.185473	0.687928
Zm00001eb202310	5462.43	-3.9149	0.384407	-10.1842	2.33174e-24	1.83754e-22	TRUE	0.027691	0.966888	1.72838	-0.924407	-0.905722	-0.489087	-0.403741
Zm00001eb306670	455.025	-3.90953	0.506982	-7.71137	1.24472e-14	3.7808e-13	TRUE	1.97511	0.237501	0.109498	-0.962016	-0.934965	-0.477635	0.052501
Zm00001eb206510	3477.99	-3.90496	0.449842	-8.68074	3.93213e-18	1.74304e-16	TRUE	2.03901	0.103527	0.426033	-0.643962	-0.658419	-0.647051	-0.619138
Zm00001eb034050	312.992	-3.89695	0.678387	-5.74444	9.22268e-09	1.23186e-07	TRUE	0.642887	0.321245	1.09882	-1.04777	-1.11493	-0.932529	1.03227
Zm00001eb033870	1011.99	-3.89412	0.611554	-6.36759	1.92024e-10	3.36695e-09	TRUE	-0.362579	1.75885	1.04725	-0.747642	-0.757143	-0.239803	-0.698933
Zm00001eb054700	1306.32	-3.88981	0.524372	-7.41804	1.18868e-13	3.1814e-12	TRUE	0.089438	1.88657	0.752676	-0.694326	-0.626678	-0.684567	-0.723111
Zm00001eb178740	251.96	-3.88578	0.59431	-6.5383	6.22199e-11	1.16899e-09	TRUE	-0.011824	1.64025	1.10899	-0.825556	-0.85774	-0.296014	-0.758099
Zm00001eb038140	221.026	-3.88554	0.456108	-8.5189	1.6107e-17	6.73125e-16	TRUE	1.27984	0.919005	0.937675	-1.00002	-0.942823	-0.461152	-0.732526
Zm00001eb381530	1119.55	-3.8725	0.350827	-11.0382	2.4999e-28	2.7704e-26	TRUE	0.293459	0.85493	1.53419	-1.15277	-1.18373	-0.313181	-0.032906
Zm00001eb232950	369.632	-3.86644	0.397161	-9.73518	2.13438e-22	1.43489e-20	TRUE	0.146391	0.393462	1.00582	-1.39515	-1.4302	0.613325	0.666341
Zm00001eb387810	750.634	-3.85701	0.544617	-7.08205	1.42042e-12	3.29227e-11	TRUE	-0.401391	1.28923	1.5999	-0.757855	-0.749408	-0.475357	-0.505126
Zm00001eb067440	1870.09	-3.85317	0.275605	-13.9808	2.04221e-44	6.73691e-42	TRUE	0.47099	0.996044	1.12684	-1.33917	-1.31148	0.002475	0.054304
Zm00001eb365520	745.248	-3.84975	0.339636	-11.3349	8.81093e-30	1.08681e-27	TRUE	0.973207	0.670015	1.47387	-0.773913	-0.819252	-0.775153	-0.748777
Zm00001eb078530	277.655	-3.84355	0.660111	-5.82258	5.79453e-09	8.01907e-08	TRUE	0.342548	1.25194	1.42299	-0.850452	-0.704908	-0.705229	-0.756893
Zm00001eb307770	707.818	-3.8034	0.307171	-12.382	3.26886e-35	5.26917e-33	TRUE	0.455989	0.699948	0.993212	-1.42132	-1.43084	0.327813	0.375195
Zm00001eb316270	4103.68	-3.80229	0.571494	-6.65325	2.86696e-11	5.68781e-10	TRUE	-0.31888	1.31328	1.4354	-0.950359	-0.864405	0.062455	-0.677483
Zm00001eb065850	1698.01	-3.79689	0.368363	-10.3075	6.5195e-25	5.43995e-23	TRUE	0.290572	0.978016	1.63997	-0.894732	-0.933809	-0.623073	-0.456941
Zm00001eb117170	2135.03	-3.79184	0.350437	-10.8203	2.75788e-27	2.7745e-25	TRUE	0.442002	0.673774	1.45274	-1.24386	-1.20661	-0.398231	0.280187
Zm00001eb111300	766.002	-3.78445	0.380107	-9.95626	2.36809e-23	1.69653e-21	TRUE	0.431455	-0.246648	0.170171	-1.22377	-1.24779	0.594892	1.5217
Zm00001eb408730	1902.18	-3.76886	0.404948	-9.30702	1.31463e-20	7.25605e-19	TRUE	1.86279	0.150501	0.44859	-1.0223	-1.04752	-0.404456	0.012402
Zm00001eb088950	440.343	-3.75674	0.635064	-5.91553	3.30818e-09	4.78842e-08	TRUE	-0.660976	1.59232	0.846943	-0.962178	-0.924932	0.565835	-0.457012
Zm00001eb002930	664.38	-3.74871	0.318138	-11.7833	4.7597e-32	6.68478e-30	TRUE	1.06662	0.652292	1.29877	-1.11444	-1.07871	-0.45975	-0.364775
Zm00001eb149250	4127.59	-3.73227	0.281619	-13.2529	4.34106e-40	1.00947e-37	TRUE	1.15498	0.799692	1.17162	-0.981875	-1.01159	-0.677775	-0.45505
Zm00001eb216440	847.412	-3.7177	0.444396	-8.36573	5.9745e-17	2.2967e-15	TRUE	2.02465	0.170842	0.385737	-0.759399	-0.769148	-0.511272	-0.541413
Zm00001eb253730	285.189	-3.68937	0.503007	-7.33463	2.22338e-13	5.76576e-12	TRUE	0.048422	0.772393	1.86186	-0.874335	-0.817204	-0.421056	-0.570077
Zm00001eb401760	867.229	-3.6775	0.48069	-7.65046	2.00257e-14	5.90572e-13	TRUE	1.91056	0.502287	0.36157	-0.817717	-0.726079	-0.532561	-0.698055
Zm00001eb397600	6686.02	-3.65723	0.789642	-4.6315	3.63032e-06	2.96636e-05	TRUE	1.42408	0.238591	0.971788	-0.992157	-0.993654	-0.952257	0.303609
Zm00001eb218620	160.943	-3.65285	0.557686	-6.55002	5.75311e-11	1.08521e-09	TRUE	0.409112	1.07265	1.52519	-0.808851	-0.952857	-0.718342	-0.526909
Zm00001eb413850	2454.56	-3.64785	0.321057	-11.362	6.46479e-30	8.11532e-28	TRUE	0.828875	0.705284	1.55687	-0.81807	-0.756793	-0.771444	-0.744719
Zm00001eb185020	218.154	-3.63756	0.512918	-7.09188	1.32299e-12	3.08154e-11	TRUE	-0.240316	0.635071	1.6217	-1.18704	-1.19106	0.091523	0.270127
Zm00001eb341680	960.169	-3.63406	0.483323	-7.51891	5.52364e-14	1.55154e-12	TRUE	1.46268	-0.209434	-0.288353	-1.11442	-1.11241	0.152467	1.10947
Zm00001eb110240	1427.07	-3.63297	0.416208	-8.72873	2.57544e-18	1.17468e-16	TRUE	0.388786	-0.275718	0.672378	-1.19055	-1.19072	1.57643	0.01939
Zm00001eb276220	492.332	-3.62368	0.384665	-9.42035	4.49573e-21	2.67949e-19	TRUE	1.19468	0.743669	1.22556	-0.781262	-0.891429	-0.72573	-0.765495
Zm00001eb243350	748.238	-3.62303	0.568593	-6.37192	1.86678e-10	3.27726e-09	TRUE	-0.765771	0.74784	0.937381	-1.07997	-1.12819	1.23854	0.050179
Zm00001eb054880	281.695	-3.6155	0.483213	-7.48221	7.30834e-14	2.02478e-12	TRUE	-0.048498	0.469076	0.301187	-1.19953	-1.21254	1.6665	0.023806
Zm00001eb022720	498.331	-3.61184	0.337642	-10.6973	1.04823e-26	1.00604e-24	TRUE	1.03065	0.78989	1.22838	-1.11027	-1.08214	-0.297091	-0.559416
Zm00001eb428610	77.7967	-3.61023	0.681888	-5.29446	1.19369e-07	1.33117e-06	TRUE	-0.000897	1.43985	1.3073	-0.868257	-0.933524	-0.201646	-0.742828
Zm00001eb032890	205.008	-3.61019	0.602277	-5.99423	2.04449e-09	3.0689e-08	TRUE	-0.60095	1.49508	0.974185	-1.05072	-1.07095	0.419534	-0.166186
Zm00001eb341540	799.619	-3.59093	0.374826	-9.58024	9.6823e-22	6.18664e-20	TRUE	1.11835	0.80155	0.632324	-1.25443	-1.32824	-0.414138	0.444578
Zm00001eb394030	452.503	-3.5866	0.42165	-8.5061	1.79884e-17	7.46099e-16	TRUE	0.398908	0.614675	1.66768	-1.08165	-1.19318	-0.150031	-0.256404
Zm00001eb189940	1096.98	-3.58498	0.308076	-11.6367	2.68296e-31	3.59036e-29	TRUE	1.19996	0.802619	1.07307	-1.05801	-1.07085	-0.315095	-0.631684
Zm00001eb148190	2501.47	-3.5721	0.320369	-11.1499	7.1652e-29	8.26328e-27	TRUE	1.34597	0.487601	0.929372	-1.18088	-1.22003	0.082032	-0.444063
Zm00001eb155870	377.027	-3.56129	0.389784	-9.13657	6.44622e-20	3.39924e-18	TRUE	0.950563	0.467011	0.857806	-1.33832	-1.40851	-0.122287	0.593742
Zm00001eb359850	405.957	-3.54973	0.442514	-8.02172	1.04274e-15	3.53014e-14	TRUE	1.51433	0.089716	0.093512	-1.24801	-1.32004	0.360733	0.509757
Zm00001eb336840	3936.82	-3.5305	0.284429	-12.4126	2.2327e-35	3.64032e-33	TRUE	1.07216	0.432004	0.620586	-1.38885	-1.37814	-0.02839	0.670624
Zm00001eb336470	5513.93	-3.53014	0.320277	-11.0221	2.98921e-28	3.25643e-26	TRUE	1.24674	0.099956	0.904818	-1.29423	-1.35966	0.122797	0.279585
Zm00001eb355650	6492.64	-3.52666	0.311387	-11.3257	9.79344e-30	1.19759e-27	TRUE	1.63129	0.417684	0.605536	-1.15541	-1.16755	-0.315176	-0.016379
Zm00001eb308940	2916.99	-3.52194	0.43732	-8.05347	8.04777e-16	2.77081e-14	TRUE	0.198688	1.06066	1.64806	-0.755653	-0.680284	-0.774721	-0.696743
Zm00001eb009290	1218.29	-3.51146	0.336537	-10.4341	1.73281e-25	1.5267e-23	TRUE	0.844751	0.741815	1.51436	-0.82885	-0.894642	-0.630567	-0.74687
Zm00001eb332940	13681.3	-3.50828	0.291873	-12.0199	2.79424e-33	4.12878e-31	TRUE	1.05443	0.630643	0.731256	-1.3265	-1.35009	-0.28189	0.542153
Zm00001eb236830	2905.92	-3.50116	0.303745	-11.5267	9.68262e-31	1.27174e-28	TRUE	0.492758	0.752154	1.45576	-1.22417	-1.20313	0.073965	-0.347332
Zm00001eb234930	451.262	-3.49305	0.49851	-7.00697	2.43528e-12	5.47456e-11	TRUE	-0.011462	1.27449	1.54014	-0.847549	-0.731141	-0.633731	-0.590749
Zm00001eb130660	1415.94	-3.4824	0.554853	-6.27625	3.46827e-10	5.90606e-09	TRUE	0.399952	1.4623	1.08854	-1.01045	-0.852001	-0.246123	-0.842217
Zm00001eb285010	1909.86	-3.47982	0.257115	-13.5341	9.83859e-42	2.58445e-39	TRUE	0.854736	0.731283	1.24278	-1.27124	-1.23353	-0.16143	-0.162596
Zm00001eb196170	1654.06	-3.47313	0.362859	-9.57157	1.05298e-21	6.63846e-20	TRUE	1.26212	0.368529	1.39513	-0.799242	-0.890545	-0.684266	-0.651733
Zm00001eb420890	4967.75	-3.4719	0.361696	-9.59895	8.0761e-22	5.18368e-20	TRUE	1.73631	0.309969	0.585026	-1.05782	-1.13186	-0.377783	-0.063838
Zm00001eb164710	3577.07	-3.46742	0.564861	-6.13855	8.32801e-10	1.31698e-08	TRUE	-0.203963	1.87916	0.882064	-0.641066	-0.665301	-0.544278	-0.706613
Zm00001eb188340	32110	-3.46629	0.43353	-7.99551	1.29042e-15	4.29687e-14	TRUE	1.83511	-0.149085	0.247498	-1.05178	-1.07951	-0.260113	0.457879
Zm00001eb034120	3789.17	-3.46252	0.435024	-7.95938	1.72897e-15	5.66406e-14	TRUE	1.98029	-0.027387	0.186782	-0.971889	-1.0158	-0.241621	0.089629
Zm00001eb251040	161.646	-3.46167	0.489371	-7.07371	1.50846e-12	3.47361e-11	TRUE	1.02652	0.56479	1.47559	-0.878472	-0.91354	-0.513056	-0.761838
Zm00001eb247440	561.95	-3.45202	0.337484	-10.2287	1.47488e-24	1.20237e-22	TRUE	0.773469	0.64832	1.24824	-1.26776	-1.30861	-0.269609	0.175956
Zm00001eb032800	653.325	-3.43491	0.319809	-10.7405	6.56822e-27	6.47015e-25	TRUE	0.879581	0.650959	1.18975	-1.25988	-1.31608	-0.241446	0.097112
Zm00001eb040940	1068.12	-3.43398	0.475432	-7.22286	5.09066e-13	1.25584e-11	TRUE	0.448466	0.833938	1.69623	-0.72263	-0.699913	-0.736612	-0.819482
Zm00001eb258190	1499.06	-3.43091	0.428486	-8.00707	1.17477e-15	3.95824e-14	TRUE	2.00258	0.338952	0.318551	-0.67263	-0.706592	-0.666173	-0.614684
Zm00001eb302650	197.235	-3.429	0.650488	-5.27142	1.35372e-07	1.48741e-06	TRUE	1.88741	0.209012	0.211668	-1.17256	-0.980872	-0.066373	-0.08828
Zm00001eb095410	825.361	-3.4268	0.407317	-8.41311	3.99293e-17	1.57771e-15	TRUE	0.914419	0.474098	0.771315	-1.33459	-1.51874	0.257397	0.436103
Zm00001eb393130	16806.2	-3.41895	0.443814	-7.70356	1.32322e-14	4.01066e-13	TRUE	2.06784	0.149079	0.314178	-0.63322	-0.60126	-0.652303	-0.644311
Zm00001eb006480	2196.33	-3.41824	0.306277	-11.1606	6.3548e-29	7.38876e-27	TRUE	1.27034	0.477154	0.142534	-1.36102	-1.38225	0.35175	0.501496
Zm00001eb153910	813.779	-3.41569	0.433237	-7.88412	3.16748e-15	1.02115e-13	TRUE	0.90087	0.099686	1.78777	-0.824067	-0.751876	-0.567159	-0.645221
Zm00001eb082690	748.944	-3.41372	0.448139	-7.61754	2.58565e-14	7.56236e-13	TRUE	-0.375087	0.605812	0.510297	-1.21345	-1.31641	0.432603	1.35623
Zm00001eb067570	317.105	-3.41168	0.630365	-5.41224	6.22429e-08	7.27877e-07	TRUE	2.17289	0.127646	-0.079072	-0.581488	-0.601779	-0.427423	-0.610775
Zm00001eb343110	1575.56	-3.40962	0.427576	-7.97431	1.53232e-15	5.04191e-14	TRUE	-0.18883	1.14198	1.64024	-0.915564	-0.91552	-0.418795	-0.343514
Zm00001eb163030	732.202	-3.40947	0.453111	-7.5246	5.28835e-14	1.49136e-12	TRUE	-0.071361	1.07338	1.70502	-0.866444	-0.799287	-0.476367	-0.564942
Zm00001eb422570	108.407	-3.40848	0.664328	-5.13072	2.88629e-07	2.96466e-06	TRUE	0.225104	1.41614	1.28611	-0.992404	-0.790443	-0.4601	-0.684413
Zm00001eb184920	1839.64	-3.40257	0.3447	-9.87109	5.55557e-23	3.92069e-21	TRUE	0.472689	1.15871	1.37274	-0.99943	-0.980012	-0.331693	-0.692999
Zm00001eb318160	2886.81	-3.39726	0.442565	-7.67629	1.63759e-14	4.89036e-13	TRUE	-0.210813	0.725098	1.90741	-0.902116	-0.875706	-0.364541	-0.279329
Zm00001eb346810	494.84	-3.3847	0.423115	-7.99947	1.24958e-15	4.17065e-14	TRUE	-0.25386	1.02622	1.19529	-1.25896	-1.28723	0.140193	0.438336
Zm00001eb353100	52.1496	-3.37885	0.730647	-4.62447	3.75564e-06	3.06347e-05	TRUE	-0.484088	0.002646	-0.160929	-0.994775	-0.994775	1.70138	0.930539
Zm00001eb101470	3737.03	-3.37714	0.361397	-9.34468	9.21666e-21	5.2087e-19	TRUE	1.00624	0.120902	1.01915	-1.27697	-1.38752	-0.090222	0.608428
Zm00001eb369380	183.784	-3.37589	0.469662	-7.18792	6.57855e-13	1.59789e-11	TRUE	1.41204	0.63838	1.07289	-0.834506	-0.717355	-0.755607	-0.815838
Zm00001eb006850	621.687	-3.37583	0.33413	-10.1033	5.34034e-24	4.12745e-22	TRUE	1.01772	0.991962	1.02458	-1.10875	-1.14062	-0.177807	-0.607085
Zm00001eb339450	351.928	-3.3708	0.429382	-7.85036	4.1485e-15	1.31061e-13	TRUE	1.49626	0.685465	0.303546	-1.22361	-1.19064	0.339876	-0.410895
Zm00001eb396500	144.491	-3.36988	0.584874	-5.76172	8.32619e-09	1.1195e-07	TRUE	0.188115	0.005937	1.94411	-0.967566	-1.06986	0.172268	-0.273003
Zm00001eb272540	167.427	-3.36927	0.577495	-5.83429	5.40203e-09	7.5199e-08	TRUE	2.02179	-0.067905	0.099361	-0.924445	-1.00005	-0.196462	0.067711
Zm00001eb352570	288.485	-3.36842	0.571735	-5.89158	3.82521e-09	5.47534e-08	TRUE	2.16202	0.028478	0.083554	-0.638814	-0.629238	-0.440338	-0.56566
Zm00001eb257440	1509.58	-3.35051	0.333627	-10.0427	9.89566e-24	7.34921e-22	TRUE	0.904798	0.477575	1.60051	-0.912625	-0.974419	-0.614399	-0.481436
Zm00001eb260930	2331.06	-3.3496	0.290235	-11.541	8.19747e-31	1.08674e-28	TRUE	1.16704	0.467168	1.31939	-1.07656	-1.0918	-0.491813	-0.293427
Zm00001eb082060	330.13	-3.34622	0.646728	-5.17408	2.29038e-07	2.39948e-06	TRUE	1.20355	0.713179	1.23906	-0.787868	-0.684166	-0.866868	-0.816884
Zm00001eb337640	116.216	-3.32548	0.676455	-4.91603	8.83166e-07	8.15606e-06	TRUE	-0.28465	1.14045	1.69525	-0.762865	-0.730111	-0.342366	-0.715708
Zm00001eb163340	12548	-3.31958	0.435114	-7.62922	2.36182e-14	6.93632e-13	TRUE	0.102153	0.613115	1.44353	-1.12572	-1.16121	-0.609003	0.737127
Zm00001eb096090	706.148	-3.31948	0.338375	-9.81006	1.01908e-22	7.01732e-21	TRUE	1.08081	0.802615	1.25816	-0.904127	-1.02389	-0.642125	-0.571445
Zm00001eb127650	4207.99	-3.31566	0.415806	-7.97406	1.5355e-15	5.04191e-14	TRUE	1.93556	0.147179	0.370428	-0.950803	-0.961042	-0.516218	-0.025102
Zm00001eb094730	12543.1	-3.31328	0.32809	-10.0987	5.59812e-24	4.26932e-22	TRUE	0.543139	0.848106	1.54127	-1.03852	-1.02999	-0.652855	-0.21116
Zm00001eb293780	17649	-3.31027	0.391188	-8.4621	2.62609e-17	1.06432e-15	TRUE	1.03643	0.659028	1.31832	-1.00574	-1.01629	-0.825569	-0.166181
Zm00001eb040610	669.46	-3.3083	0.486337	-6.80248	1.02836e-11	2.17072e-10	TRUE	1.98377	0.087607	0.540317	-0.715744	-0.777212	-0.45236	-0.666379
Zm00001eb103330	239.068	-3.30616	0.563267	-5.86961	4.36811e-09	6.17148e-08	TRUE	-0.534144	0.327687	0.613523	-1.10302	-1.05831	1.70039	0.053879
Zm00001eb397360	5888.32	-3.30549	0.288824	-11.4446	2.50124e-30	3.25506e-28	TRUE	1.30244	0.586847	1.23104	-0.794708	-0.846435	-0.769518	-0.709668
Zm00001eb371960	131.405	-3.30058	0.550047	-6.00055	1.96651e-09	2.96206e-08	TRUE	1.89436	0.064182	0.721783	-0.811691	-0.816568	-0.465818	-0.586249
Zm00001eb369500	400.408	-3.29401	0.407056	-8.09228	5.85558e-16	2.03582e-14	TRUE	-0.144249	0.299869	1.05196	-1.33731	-1.33303	0.459887	1.00288
Zm00001eb171840	469.163	-3.28833	0.389629	-8.43963	3.18342e-17	1.27202e-15	TRUE	1.33568	-0.034652	0.945827	-1.27959	-1.27811	0.133767	0.177079
Zm00001eb135810	7272.6	-3.28501	0.369227	-8.89699	5.7383e-19	2.80682e-17	TRUE	-0.103751	0.6897	1.58688	-1.179	-1.20732	-0.143159	0.356658
Zm00001eb053620	488.783	-3.28405	0.367341	-8.94008	3.88903e-19	1.91548e-17	TRUE	0.24735	0.598176	1.46425	-1.31963	-1.28022	0.230287	0.059784
Zm00001eb178980	112.79	-3.28308	0.490931	-6.68746	2.27082e-11	4.59509e-10	TRUE	1.40411	0.741669	0.980976	-0.876282	-0.935946	-0.593139	-0.721389
Zm00001eb097220	579.738	-3.28182	0.416336	-7.88264	3.20536e-15	1.02637e-13	TRUE	0.370227	0.341889	0.231688	-1.31638	-1.48805	1.01474	0.845889
Zm00001eb135370	2761.49	-3.27646	0.288922	-11.3403	8.28541e-30	1.03095e-27	TRUE	1.1741	0.327813	0.491951	-1.37392	-1.39532	0.126144	0.649232
Zm00001eb154640	1622.05	-3.27171	0.276794	-11.82	3.07631e-32	4.36375e-30	TRUE	0.577498	0.581253	0.536224	-1.48107	-1.41299	0.342527	0.856553
Zm00001eb230860	14343.2	-3.27025	0.378774	-8.63379	5.93513e-18	2.6065e-16	TRUE	1.72241	0.179628	0.818353	-0.963571	-1.01961	-0.582523	-0.154691
Zm00001eb347680	15689.8	-3.26858	0.3106	-10.5234	6.73721e-26	6.04856e-24	TRUE	0.198721	0.918068	1.47189	-1.18437	-1.21744	-0.249744	0.062873
Zm00001eb192410	1772.69	-3.26769	0.569061	-5.74225	9.3425e-09	1.24435e-07	TRUE	-0.442458	0.990474	1.83587	-0.675744	-0.655918	-0.447607	-0.604616
Zm00001eb223850	720.256	-3.26611	0.341775	-9.55631	1.22034e-21	7.59234e-20	TRUE	0.0635	0.289357	0.913858	-1.38117	-1.36693	0.42151	1.05987
Zm00001eb051150	1480.1	-3.26547	0.357995	-9.12157	7.40455e-20	3.86153e-18	TRUE	-0.174625	0.83523	1.21775	-1.29741	-1.34604	0.357874	0.407214
Zm00001eb250080	626.835	-3.26506	0.372505	-8.76515	1.86526e-18	8.67499e-17	TRUE	1.33744	0.786063	1.03794	-0.778571	-0.864077	-0.689251	-0.82955
Zm00001eb116740	6292.26	-3.26028	0.481841	-6.76631	1.32105e-11	2.75169e-10	TRUE	-0.26667	1.37519	1.51989	-0.643849	-0.672678	-0.648516	-0.663369
Zm00001eb373040	2251.2	-3.25259	0.437911	-7.4275	1.10665e-13	2.98439e-12	TRUE	0.036247	1.18004	1.60961	-0.62575	-0.651315	-0.781714	-0.767124
Zm00001eb233910	1348.56	-3.25182	0.392479	-8.28533	1.17786e-16	4.35103e-15	TRUE	1.42797	0.328189	0.608064	-1.22084	-1.39426	0.031732	0.219154
Zm00001eb396910	102.371	-3.25033	0.544956	-5.96439	2.45549e-09	3.65489e-08	TRUE	0.174328	0.800504	1.67636	-1.1235	-1.06797	-0.300944	-0.158774
Zm00001eb364060	390.185	-3.24931	0.552885	-5.87702	4.17721e-09	5.94791e-08	TRUE	-0.326291	1.37078	1.5301	-0.663886	-0.735884	-0.56617	-0.608654
Zm00001eb068680	202.509	-3.2453	0.541824	-5.98958	2.10383e-09	3.1513e-08	TRUE	-0.224354	1.38494	1.47582	-0.811785	-0.827923	-0.419562	-0.577133
Zm00001eb427090	2490.99	-3.24529	0.43088	-7.53176	5.00606e-14	1.41456e-12	TRUE	-0.105595	1.3748	1.05241	-1.14742	-1.09433	0.446843	-0.526706
Zm00001eb090430	698.634	-3.23593	0.344549	-9.39177	5.90001e-21	3.45833e-19	TRUE	1.61341	0.699885	0.748055	-0.81408	-0.758497	-0.769068	-0.719704
Zm00001eb073630	1857.44	-3.23229	0.374817	-8.62364	6.48563e-18	2.83073e-16	TRUE	0.572429	0.827024	1.63475	-0.764636	-0.797192	-0.659341	-0.813037
Zm00001eb424600	901.336	-3.2288	0.320146	-10.0854	6.40936e-24	4.86186e-22	TRUE	0.988179	0.432298	0.355503	-1.41318	-1.38539	0.143195	0.879398
Zm00001eb371030	291.203	-3.22872	0.370524	-8.71393	2.93508e-18	1.31753e-16	TRUE	0.529335	0.769578	1.1472	-1.33719	-1.401	0.051379	0.240703
Zm00001eb085510	265.198	-3.22213	0.467889	-6.88652	5.71736e-12	1.23066e-10	TRUE	0.114961	1.04348	1.08664	-1.24068	-1.44166	0.262616	0.17465
Zm00001eb427990	904.512	-3.2191	0.362292	-8.88536	6.37142e-19	3.10579e-17	TRUE	1.12381	1.05887	1.0138	-0.680255	-0.739709	-0.880363	-0.896156
Zm00001eb348960	3963.2	-3.19956	0.3643	-8.78276	1.5951e-18	7.46749e-17	TRUE	-0.12174	0.23926	0.75388	-1.28081	-1.22581	0.154463	1.48076
Zm00001eb002920	209.57	-3.19785	0.519462	-6.15608	7.45665e-10	1.18979e-08	TRUE	-0.049225	1.56725	1.22512	-0.897904	-0.824906	-0.381418	-0.638914
Zm00001eb217060	1966.5	-3.19257	0.328086	-9.73087	2.22672e-22	1.4899e-20	TRUE	0.380097	0.784501	1.71276	-0.972961	-0.948444	-0.436638	-0.519314
Zm00001eb392420	532.835	-3.19023	0.494783	-6.44774	1.13531e-10	2.06202e-09	TRUE	-0.365644	0.849611	1.75186	-1.03164	-0.966656	-0.274584	0.037055
Zm00001eb064230	646.812	-3.18593	0.393754	-8.09118	5.90877e-16	2.04929e-14	TRUE	0.89496	-0.000597	0.127914	-1.34089	-1.26433	1.30784	0.27511
Zm00001eb251510	830.316	-3.18444	0.421718	-7.55112	4.31538e-14	1.22673e-12	TRUE	0.165063	0.965675	1.70251	-0.873685	-0.843816	-0.40972	-0.706025
Zm00001eb099010	740.959	-3.17953	0.453634	-7.00901	2.40002e-12	5.40385e-11	TRUE	0.297273	-0.612176	1.02362	-1.20553	-1.23568	0.929784	0.802713
Zm00001eb204260	1143.74	-3.17737	0.450298	-7.05614	1.71193e-12	3.91043e-11	TRUE	1.87202	0.000854	0.136911	-1.02763	-1.0973	-0.266537	0.381674
Zm00001eb292390	1232.56	-3.17643	0.425996	-7.45649	8.88597e-14	2.42866e-12	TRUE	-0.206917	0.913632	1.75594	-0.977379	-0.972955	-0.201359	-0.310957
Zm00001eb238870	257.298	-3.17201	0.446113	-7.11032	1.15772e-12	2.71892e-11	TRUE	1.60963	0.596582	0.835968	-0.620254	-0.709418	-0.856255	-0.856255
Zm00001eb044630	2230.17	-3.17112	0.407925	-7.77377	7.61816e-15	2.36982e-13	TRUE	-0.17834	0.785786	1.77617	-1.01291	-1.05324	-0.230322	-0.087148
Zm00001eb198110	631.795	-3.16716	0.303951	-10.42	2.01052e-25	1.76045e-23	TRUE	1.08953	0.852574	0.93951	-1.23318	-1.23444	-0.398173	-0.01582
Zm00001eb192970	1799	-3.16578	0.435742	-7.26528	3.72275e-13	9.31344e-12	TRUE	0.257496	1.17036	1.53497	-0.753113	-0.655644	-0.736949	-0.817118
Zm00001eb325340	570.611	-3.14542	0.539559	-5.82961	5.55563e-09	7.71102e-08	TRUE	-0.051864	-0.050822	-0.165376	-0.804153	-0.798492	2.14642	-0.275712
Zm00001eb132300	1527.68	-3.13858	0.314258	-9.98728	1.73278e-23	1.24769e-21	TRUE	0.455591	0.423962	0.994896	-1.42869	-1.35847	0.056502	0.856208
Zm00001eb206440	1142.04	-3.13285	0.338198	-9.26335	1.98114e-20	1.07672e-18	TRUE	0.252757	0.897419	1.29461	-1.29275	-1.25621	0.368349	-0.264173
Zm00001eb390900	1386.01	-3.13134	0.31051	-10.0845	6.47005e-24	4.88179e-22	TRUE	1.03948	0.501409	0.831796	-1.33264	-1.35457	-0.240194	0.554717
Zm00001eb155000	741.158	-3.12896	0.363152	-8.61611	6.92661e-18	3.01393e-16	TRUE	0.512266	0.990917	0.828355	-1.30371	-1.4838	0.407179	0.048792
Zm00001eb270810	271.545	-3.1258	0.477062	-6.55218	5.67015e-11	1.07241e-09	TRUE	0.208754	0.139374	1.8675	-1.06126	-1.1137	0.182193	-0.222864
Zm00001eb390390	586.199	-3.12308	0.421914	-7.40216	1.33984e-13	3.56579e-12	TRUE	1.68982	0.218487	0.497518	-1.09835	-1.19204	-0.385782	0.270349
Zm00001eb010330	222.354	-3.12107	0.407259	-7.66359	1.80805e-14	5.36552e-13	TRUE	0.842842	0.598059	1.41278	-1.17356	-1.1685	-0.432539	-0.079083
Zm00001eb393250	1599.82	-3.1196	0.286058	-10.9055	1.0853e-27	1.13198e-25	TRUE	0.710283	0.893292	1.38458	-1.12494	-1.08472	-0.522153	-0.256339
Zm00001eb101520	2702.33	-3.11652	0.418181	-7.45255	9.15521e-14	2.49743e-12	TRUE	-0.202747	0.917015	0.59539	-1.20628	-1.1901	1.35007	-0.263352
Zm00001eb123730	220.111	-3.10724	0.461488	-6.73309	1.66099e-11	3.41962e-10	TRUE	0.856336	0.442921	1.39804	-1.34026	-1.12875	-0.213018	-0.015265
Zm00001eb423310	2451.26	-3.09584	0.276357	-11.2023	3.97318e-29	4.65782e-27	TRUE	0.462244	0.771499	1.27039	-1.32838	-1.31358	-0.128097	0.265924
Zm00001eb266330	858.715	-3.08541	0.313702	-9.83549	7.91802e-23	5.47888e-21	TRUE	1.24179	0.611711	1.14823	-1.07277	-1.1062	-0.573182	-0.249568
Zm00001eb000860	772.217	-3.07819	0.290159	-10.6086	2.71678e-26	2.51879e-24	TRUE	0.501318	0.567702	0.261777	-1.4082	-1.47139	0.846846	0.701941
Zm00001eb221360	1244.22	-3.07476	0.293519	-10.4755	1.11939e-25	9.92412e-24	TRUE	1.07253	0.705434	0.801356	-1.29927	-1.36847	-0.225202	0.313618
Zm00001eb066560	781.016	-3.07385	0.446136	-6.88993	5.58196e-12	1.20701e-10	TRUE	1.14832	0.053478	0.396964	-1.17522	-1.24038	-0.387712	1.20454
Zm00001eb353780	867.921	-3.05238	0.302251	-10.0988	5.58953e-24	4.26932e-22	TRUE	1.18671	0.798517	1.19213	-0.801675	-0.841886	-0.716102	-0.817703
Zm00001eb272550	92.184	-3.04868	0.633986	-4.80875	1.51874e-06	1.34059e-05	TRUE	-0.327147	0.407213	1.141	-1.17071	-1.11971	1.31864	-0.249279
Zm00001eb154100	538.096	-3.04409	0.423499	-7.18794	6.57755e-13	1.59789e-11	TRUE	1.2516	-0.141084	-0.07944	-1.29437	-1.23025	0.519826	0.973727
Zm00001eb309830	190.748	-3.04309	0.680483	-4.47195	7.75087e-06	5.87005e-05	TRUE	0.522634	0.700835	1.48673	-1.03828	-1.34028	-0.38486	0.053219
Zm00001eb045300	2490.97	-3.04306	0.361823	-8.41038	4.08697e-17	1.61038e-15	TRUE	1.7624	0.331771	0.587335	-1.00679	-1.10236	-0.438337	-0.134022
Zm00001eb133070	544.243	-3.03601	0.575692	-5.27368	1.33719e-07	1.47153e-06	TRUE	2.20912	-0.127128	-0.149995	-0.651431	-0.672862	-0.402228	-0.205479
Zm00001eb043060	512.175	-3.03461	0.443759	-6.83841	8.00777e-12	1.70812e-10	TRUE	0.100675	0.689513	1.89523	-0.797019	-0.863194	-0.60393	-0.421275
Zm00001eb213020	566.244	-3.03023	0.362022	-8.3703	5.74718e-17	2.22136e-15	TRUE	0.355617	0.805963	1.61764	-1.12058	-1.07106	-0.167846	-0.419739
Zm00001eb052540	3987.61	-3.02886	0.362873	-8.3469	7.00782e-17	2.67941e-15	TRUE	0.391602	0.762067	1.52882	-1.09191	-1.19846	-0.530101	0.137974
Zm00001eb360660	1116.33	-3.02222	0.545512	-5.54015	3.02212e-08	3.73097e-07	TRUE	-0.236012	2.03073	0.323102	-0.84539	-0.78936	0.120119	-0.603189
Zm00001eb225470	1319.88	-3.02196	0.322085	-9.38248	6.44406e-21	3.76169e-19	TRUE	0.51619	0.852624	1.56878	-1.02181	-1.0343	-0.587629	-0.293856
Zm00001eb005300	448.817	-3.02168	0.627293	-4.81702	1.4572e-06	1.29109e-05	TRUE	-0.37617	1.79515	1.04833	-0.668344	-0.515736	-0.620254	-0.66298
Zm00001eb331940	29904.9	-3.01509	0.409928	-7.35517	1.90684e-13	5.01829e-12	TRUE	0.045968	0.92298	1.78632	-0.797156	-0.763287	-0.705096	-0.489728
Zm00001eb327930	62.9971	-3.00776	0.651739	-4.61498	3.93141e-06	3.19582e-05	TRUE	0.751838	0.62021	1.28136	-1.12617	-1.16359	0.418123	-0.781764
Zm00001eb012280	1877.59	-3.00738	0.321367	-9.35809	8.11915e-21	4.68171e-19	TRUE	0.452367	0.899216	1.49818	-1.07083	-1.19097	-0.340389	-0.247568
Zm00001eb000490	16040.8	-3.00581	0.429441	-6.99934	2.57165e-12	5.77198e-11	TRUE	2.03964	0.086817	0.262834	-0.841792	-0.874988	-0.513621	-0.158886
Zm00001eb217610	1116.82	-3.005	0.364845	-8.23638	1.77498e-16	6.43942e-15	TRUE	1.57535	0.071169	0.524034	-1.21538	-1.26577	-0.080343	0.390939
Zm00001eb106080	1081.58	-2.99617	0.374395	-8.00269	1.21734e-15	4.08225e-14	TRUE	0.102459	0.955902	1.61222	-1.13295	-1.02813	-0.309856	-0.199646
Zm00001eb415480	1206.54	-2.99325	0.319446	-9.37014	7.24356e-21	4.21106e-19	TRUE	0.883741	0.956041	1.2679	-0.979989	-1.03732	-0.727605	-0.362771
Zm00001eb032820	585.71	-2.99016	0.323358	-9.24722	2.30409e-20	1.24272e-18	TRUE	0.478803	0.938399	1.39923	-1.17404	-1.19686	-0.328136	-0.117399
Zm00001eb081570	288.48	-2.98936	0.425432	-7.02664	2.11568e-12	4.81717e-11	TRUE	0.15919	0.778134	1.74247	-1.03126	-1.03616	-0.241599	-0.370775
Zm00001eb081750	1886.98	-2.97802	0.29198	-10.1994	1.99468e-24	1.59856e-22	TRUE	1.1374	0.717362	1.30154	-0.811038	-0.71765	-0.826857	-0.800757
Zm00001eb392560	4532.84	-2.9646	0.328657	-9.02034	1.875e-19	9.39817e-18	TRUE	0.983987	0.835448	1.25161	-1.00417	-1.05795	-0.760083	-0.248853
Zm00001eb316870	1396.86	-2.96406	0.384942	-7.70003	1.3603e-14	4.11116e-13	TRUE	1.51066	-0.038574	0.743344	-1.20903	-1.18093	-0.295034	0.469562
Zm00001eb409850	1041.18	-2.9616	0.302562	-9.7884	1.26273e-22	8.65303e-21	TRUE	0.410946	0.733012	0.054962	-1.3702	-1.43965	0.952439	0.658493
Zm00001eb020380	790.654	-2.96111	0.36349	-8.14633	3.75147e-16	1.31719e-14	TRUE	0.356752	0.897472	1.39921	-1.15682	-1.23488	-0.456503	0.194763
Zm00001eb194420	779.884	-2.95926	0.297517	-9.9465	2.61212e-23	1.86196e-21	TRUE	0.357931	1.02558	0.598374	-1.39482	-1.45751	0.353593	0.516846
Zm00001eb178110	769.269	-2.95918	0.367903	-8.04336	8.74047e-16	2.98037e-14	TRUE	1.28637	0.24776	0.207388	-1.29515	-1.43025	0.621989	0.361894
Zm00001eb160440	604.173	-2.95485	0.548524	-5.38692	7.16745e-08	8.29961e-07	TRUE	-0.129505	0.587624	2.02201	-0.538413	-0.627936	-0.623781	-0.690001
Zm00001eb260600	10412	-2.94751	0.315798	-9.33353	1.02399e-20	5.71861e-19	TRUE	0.479333	0.453542	1.14148	-1.31679	-1.34287	-0.2332	0.818505
Zm00001eb188700	2153.29	-2.94648	0.278514	-10.5793	3.71648e-26	3.40118e-24	TRUE	1.41178	0.596235	1.02752	-1.01	-1.03311	-0.584852	-0.40757
Zm00001eb054040	1600.68	-2.94533	0.389296	-7.56579	3.85519e-14	1.10254e-12	TRUE	0.47052	1.86615	0.507738	-0.761696	-0.729193	-0.604719	-0.748802
Zm00001eb033470	413.013	-2.93994	0.348047	-8.44696	2.98986e-17	1.20145e-15	TRUE	1.49335	0.708656	0.907283	-0.804703	-0.9011	-0.709206	-0.694286
Zm00001eb215800	5128.99	-2.9369	0.327647	-8.96362	3.14204e-19	1.55296e-17	TRUE	0.842353	-0.117655	0.612562	-1.31126	-1.36655	0.214214	1.12633
Zm00001eb169800	367.672	-2.93649	0.358392	-8.1935	2.53743e-16	9.0209e-15	TRUE	0.103102	0.034888	0.043811	-1.24812	-1.22259	0.748116	1.54079
Zm00001eb342660	669.829	-2.93444	0.392669	-7.47307	7.83442e-14	2.15789e-12	TRUE	0.075656	1.07803	1.56889	-0.981758	-1.09304	-0.289677	-0.358099
Zm00001eb017420	927.529	-2.92887	0.571878	-5.1215	3.03111e-07	3.09326e-06	TRUE	-0.522166	1.92686	0.63513	-0.780999	-0.883607	0.086307	-0.461523
Zm00001eb081770	1162.96	-2.9267	0.823426	-3.5543	0.000378994	0.00180162	TRUE	-0.063492	-0.243279	1.05423	-0.842346	-0.85069	-0.740699	1.68628
Zm00001eb328500	1127.78	-2.92463	0.313251	-9.33638	9.96809e-21	5.58883e-19	TRUE	0.832926	0.791977	0.633081	-1.3406	-1.40443	-0.198054	0.6851
Zm00001eb350930	601.701	-2.92362	0.369024	-7.9226	2.32601e-15	7.53298e-14	TRUE	1.6841	0.300656	0.75892	-1.02808	-1.12512	-0.307215	-0.283256
Zm00001eb179130	970.806	-2.91977	0.440414	-6.62961	3.36582e-11	6.63114e-10	TRUE	1.64818	0.070071	0.10257	-1.10341	-1.21509	-0.225645	0.72332
Zm00001eb254350	314.428	-2.91914	0.469458	-6.2181	5.03213e-10	8.27124e-09	TRUE	0.671234	0.112512	-0.037919	-1.16218	-1.30653	1.56624	0.156643
Zm00001eb043470	8549.57	-2.91529	0.398472	-7.31616	2.55162e-13	6.55702e-12	TRUE	1.45329	0.397297	0.932938	-1.03916	-1.08347	-0.770656	0.109757
Zm00001eb265640	781.414	-2.91131	0.317086	-9.18147	4.25265e-20	2.285e-18	TRUE	0.047686	-0.041608	0.42891	-1.27532	-1.28597	0.694867	1.43144
Zm00001eb055880	1468.54	-2.90926	0.281477	-10.3357	4.85755e-25	4.10145e-23	TRUE	1.0391	0.628247	0.788986	-1.32289	-1.44104	0.274514	0.033086
Zm00001eb400380	845.813	-2.90698	0.342975	-8.47578	2.33514e-17	9.49111e-16	TRUE	-0.010556	0.303169	1.13828	-1.33457	-1.39424	0.498925	0.798994
Zm00001eb201010	200.06	-2.9063	0.475492	-6.1122	9.82659e-10	1.54534e-08	TRUE	0.263856	0.702218	1.36293	-1.1864	-1.40856	-0.143366	0.409323
Zm00001eb345090	2041.81	-2.90591	0.310141	-9.36964	7.27797e-21	4.2138e-19	TRUE	0.935989	0.576123	1.36188	-1.11756	-1.18796	-0.524593	-0.043879
Zm00001eb100620	4000.6	-2.90516	0.340819	-8.52405	1.54067e-17	6.485e-16	TRUE	0.034515	0.864295	1.5791	-1.20178	-1.13532	0.016456	-0.157269
Zm00001eb243530	5945.25	-2.90177	0.279688	-10.375	3.22187e-25	2.73666e-23	TRUE	0.587528	0.651938	1.4887	-1.17569	-1.25964	-0.116797	-0.176033
Zm00001eb352700	193.979	-2.90013	0.415618	-6.97788	2.9967e-12	6.68369e-11	TRUE	0.876479	0.921758	1.27504	-1.12857	-0.996849	-0.615019	-0.332845
Zm00001eb040360	864.141	-2.89993	0.345541	-8.39243	4.76181e-17	1.86078e-15	TRUE	0.520826	0.702275	1.53774	-1.10336	-1.22282	-0.39588	-0.038775
Zm00001eb352820	460.003	-2.89916	0.31632	-9.16527	4.94235e-20	2.64556e-18	TRUE	0.900656	0.86987	0.737366	-1.34033	-1.40704	0.324102	-0.08463
Zm00001eb359560	7353.18	-2.89802	0.386464	-7.49882	6.4395e-14	1.79812e-12	TRUE	-0.22933	0.545553	1.70987	-1.14124	-1.15163	-0.04248	0.309259
Zm00001eb015050	222.22	-2.89799	0.487187	-5.94842	2.70744e-09	4.00469e-08	TRUE	0.85409	0.464733	0.556168	-1.25302	-1.51958	0.930059	-0.032456
Zm00001eb392870	674.519	-2.8967	0.529865	-5.46687	4.58059e-08	5.45555e-07	TRUE	-0.104857	1.41045	1.43204	-0.901375	-0.668611	-0.521889	-0.645759
Zm00001eb156710	3731.21	-2.89182	0.397988	-7.26611	3.69995e-13	9.28916e-12	TRUE	1.93266	0.173059	0.507061	-0.847125	-0.955813	-0.50146	-0.308383
Zm00001eb252320	182.626	-2.89161	0.591293	-4.89031	1.00679e-06	9.20785e-06	TRUE	2.07403	-0.187546	-0.089186	-0.848764	-0.906178	0.216336	-0.258691
Zm00001eb013300	1509.18	-2.88595	0.393227	-7.33915	2.14954e-13	5.60501e-12	TRUE	-0.041865	0.793452	1.55288	-1.12598	-1.29122	0.145315	-0.032575
Zm00001eb055580	709.959	-2.87777	0.514566	-5.59261	2.23678e-08	2.82787e-07	TRUE	-0.340241	1.00985	1.79256	-0.820955	-0.73676	-0.33961	-0.564845
Zm00001eb221310	663.625	-2.87537	0.399022	-7.20606	5.75946e-13	1.40616e-11	TRUE	0.850692	-0.183526	-0.082981	-1.21601	-1.33427	0.834683	1.13141
Zm00001eb270540	3476.88	-2.87302	0.252014	-11.4002	4.17049e-30	5.37803e-28	TRUE	0.940036	0.359649	0.769546	-1.41195	-1.42178	0.173064	0.591429
Zm00001eb236630	177.301	-2.86988	0.710402	-4.0398	5.34977e-05	0.000324579	TRUE	-0.446035	1.41974	1.49567	-0.697658	-0.529412	-0.551563	-0.690746
Zm00001eb347790	625.586	-2.86389	0.484686	-5.90875	3.44719e-09	4.96934e-08	TRUE	0.829912	-0.42433	-0.245062	-1.02965	-1.10979	1.63027	0.348651
Zm00001eb327060	1573.62	-2.86337	0.453597	-6.31259	2.74406e-10	4.72959e-09	TRUE	-0.189017	1.15768	1.58952	-0.89019	-0.952158	-0.624597	-0.091233
Zm00001eb061310	7597.29	-2.86128	0.375103	-7.628	2.38417e-14	6.98749e-13	TRUE	-0.030393	0.974201	1.30343	-1.19086	-1.19935	-0.420584	0.563564
Zm00001eb111700	218.085	-2.86048	0.652907	-4.38114	1.18061e-05	8.55745e-05	TRUE	1.70181	-0.216611	-0.350597	-0.855015	-0.990839	-0.340167	1.05142
Zm00001eb139400	1324.47	-2.85266	0.303678	-9.3937	5.79313e-21	3.42398e-19	TRUE	0.983199	0.519149	1.21629	-1.20415	-1.34934	-0.075257	-0.089891
Zm00001eb017080	2513.64	-2.85084	0.274108	-10.4004	2.46798e-25	2.13466e-23	TRUE	0.93707	0.86892	1.28434	-1.04464	-1.03057	-0.663752	-0.351369
Zm00001eb351740	452.818	-2.84996	0.525349	-5.4249	5.79872e-08	6.80917e-07	TRUE	-0.046946	1.23741	1.54505	-0.751848	-1.00734	-0.594939	-0.381388
Zm00001eb377300	565.573	-2.8496	0.282806	-10.0761	7.04361e-24	5.28644e-22	TRUE	1.01345	1.00828	1.15059	-0.992081	-0.931967	-0.607364	-0.640906
Zm00001eb240930	214.236	-2.84786	0.473517	-6.01426	1.80709e-09	2.74743e-08	TRUE	0.072917	0.769179	1.80538	-1.02926	-0.914041	-0.331289	-0.372891
Zm00001eb130330	364.128	-2.84155	0.345472	-8.22513	1.94979e-16	7.03547e-15	TRUE	0.891979	0.819872	1.34817	-1.05184	-1.05259	-0.329927	-0.625663
Zm00001eb218900	163.744	-2.84093	0.401197	-7.08114	1.42972e-12	3.30303e-11	TRUE	1.15608	0.976524	1.06448	-0.69434	-0.767782	-0.858711	-0.876242
Zm00001eb110530	935.976	-2.84012	0.333398	-8.51871	1.61341e-17	6.73125e-16	TRUE	0.326266	0.89737	1.44164	-1.16661	-1.23604	-0.339516	0.076888
Zm00001eb211140	551.925	-2.83998	0.426383	-6.66063	2.72658e-11	5.43974e-10	TRUE	1.68273	0.476841	0.829213	-0.656405	-0.719046	-0.852016	-0.761321
Zm00001eb197580	1392.18	-2.83989	0.386011	-7.35702	1.88068e-13	4.95864e-12	TRUE	0.241678	0.913979	1.68091	-0.913822	-0.934466	-0.699239	-0.28904
Zm00001eb060340	1314.23	-2.83935	0.254973	-11.1359	8.38978e-29	9.59751e-27	TRUE	0.642408	0.686551	1.06115	-1.3874	-1.39907	0.077559	0.318806
Zm00001eb177020	15744.4	-2.8391	0.330869	-8.58075	9.42603e-18	4.05177e-16	TRUE	0.324946	0.856909	1.73243	-0.812764	-0.815918	-0.587494	-0.698107
Zm00001eb167550	3225.68	-2.83803	0.348468	-8.14431	3.81452e-16	1.33602e-14	TRUE	0.581942	0.885161	1.58996	-0.753184	-0.692231	-0.85426	-0.757386
Zm00001eb390620	842.605	-2.83587	0.368471	-7.69632	1.40039e-14	4.19968e-13	TRUE	1.61227	0.460949	0.906301	-0.978708	-0.850672	-0.684189	-0.465948
Zm00001eb425060	89.6632	-2.83447	0.600952	-4.71663	2.39783e-06	2.03428e-05	TRUE	0.090305	0.582137	1.97385	-0.617712	-0.695977	-0.704961	-0.627647
Zm00001eb285170	260.025	-2.83356	0.521439	-5.43412	5.50681e-08	6.48789e-07	TRUE	-0.252026	0.41247	1.52699	-1.11966	-1.35218	0.242213	0.542184
Zm00001eb156970	33.1146	-2.83237	0.71531	-3.95964	7.50632e-05	0.000436203	TRUE	0.545537	0.40119	1.87911	-0.769503	-0.703006	-0.740945	-0.612387
Zm00001eb330040	588.028	-2.83163	0.374071	-7.56976	3.73927e-14	1.07155e-12	TRUE	-0.170741	0.916428	1.03003	-1.30978	-1.36974	0.638813	0.264995
Zm00001eb045770	710.259	-2.83021	0.390186	-7.25349	4.06166e-13	1.01434e-11	TRUE	0.818565	0.604051	1.28728	-1.14214	-1.41088	-0.096019	-0.060862
Zm00001eb044930	356.788	-2.82132	0.534654	-5.2769	1.3139e-07	1.4504e-06	TRUE	-0.449397	0.622249	1.93472	-0.87436	-0.914785	-0.070694	-0.247734
Zm00001eb182660	599.725	-2.81909	0.384109	-7.3393	2.14716e-13	5.60501e-12	TRUE	-0.157852	1.03294	1.31188	-1.23755	-1.26091	0.063158	0.248334
Zm00001eb318800	1760.42	-2.81808	0.264497	-10.6545	1.66134e-26	1.57107e-24	TRUE	1.2147	0.519642	0.851065	-1.31152	-1.32881	-0.118859	0.173779
Zm00001eb152530	831.168	-2.81417	0.446689	-6.30006	2.97522e-10	5.09705e-09	TRUE	2.0001	0.278462	0.175815	-0.838523	-0.998273	-0.328288	-0.289296
Zm00001eb012900	2081.59	-2.81216	0.378052	-7.43856	1.01788e-13	2.76073e-12	TRUE	0.072631	1.45344	1.34685	-0.747551	-0.740602	-0.725001	-0.659766
Zm00001eb161580	873.116	-2.80963	0.316328	-8.88199	6.5675e-19	3.19041e-17	TRUE	0.925078	0.296905	1.23129	-1.27011	-1.37941	0.049068	0.147179
Zm00001eb108300	1164.09	-2.79657	0.426579	-6.55581	5.53401e-11	1.04806e-09	TRUE	-0.047422	0.735925	0.998052	-1.21858	-1.19193	1.16583	-0.441873
Zm00001eb184480	540.429	-2.79574	0.300733	-9.2964	1.4528e-20	7.95674e-19	TRUE	0.572173	0.822166	0.685003	-1.3973	-1.49442	0.482688	0.329693
Zm00001eb259630	2352.65	-2.79052	0.298807	-9.33885	9.73855e-21	5.4818e-19	TRUE	1.22653	0.471771	0.942764	-1.2206	-1.3722	-0.095873	0.047611
Zm00001eb305750	1701.35	-2.78499	0.276516	-10.0717	7.36768e-24	5.50056e-22	TRUE	0.439362	0.800071	1.40528	-1.26284	-1.26083	-0.048771	-0.072269
Zm00001eb374860	399.161	-2.7848	0.366014	-7.60847	2.77361e-14	8.06223e-13	TRUE	1.24999	0.584482	1.28593	-0.780715	-0.780936	-0.715857	-0.842892
Zm00001eb025210	2855.17	-2.78465	0.267858	-10.396	2.58537e-25	2.22264e-23	TRUE	1.03922	0.597581	0.976832	-1.28939	-1.34734	-0.243985	0.267087
Zm00001eb431870	1102.85	-2.78057	0.546917	-5.08407	3.69422e-07	3.71649e-06	TRUE	-0.606539	1.50012	1.21364	-0.91284	-0.888147	0.193189	-0.499424
Zm00001eb316150	1108.58	-2.77981	0.350732	-7.92575	2.26782e-15	7.36133e-14	TRUE	1.21725	0.717749	1.21415	-0.797753	-0.900242	-0.846433	-0.60472
Zm00001eb250640	1672.7	-2.77905	0.277588	-10.0114	1.35801e-23	9.87865e-22	TRUE	1.02078	0.854139	1.30088	-0.783961	-0.892193	-0.726172	-0.773466
Zm00001eb061480	2621.68	-2.77717	0.319031	-8.70501	3.17549e-18	1.42096e-16	TRUE	0.100949	0.867854	1.26061	-1.30712	-1.29201	-0.132396	0.502117
Zm00001eb253580	198.402	-2.77643	0.425103	-6.53119	6.5248e-11	1.21782e-09	TRUE	1.14359	0.400971	1.49149	-0.72516	-0.767675	-0.750004	-0.793214
Zm00001eb382730	1534.17	-2.77547	0.376655	-7.36874	1.72245e-13	4.5499e-12	TRUE	0.296891	0.824447	1.2954	-1.18302	-1.41147	-0.181748	0.3595
Zm00001eb071040	540.543	-2.77365	0.415	-6.68348	2.3333e-11	4.7148e-10	TRUE	0.27507	1.07949	0.859551	-1.26118	-1.23217	0.800079	-0.520844
Zm00001eb414180	416.705	-2.77213	0.390092	-7.10635	1.19155e-12	2.793e-11	TRUE	0.320585	0.556087	0.185825	-1.30163	-1.51586	0.980875	0.774121
Zm00001eb141000	326.424	-2.76911	0.328089	-8.44012	3.17008e-17	1.27027e-15	TRUE	0.828991	0.947535	1.12772	-1.2116	-1.24696	-0.120353	-0.325334
Zm00001eb209990	113.52	-2.76532	0.624255	-4.4298	9.43216e-06	6.99766e-05	TRUE	-0.033114	2.1217	0.274688	-0.63258	-0.631736	-0.452672	-0.646285
Zm00001eb204700	340.765	-2.76355	0.557225	-4.95949	7.06794e-07	6.68392e-06	TRUE	-0.791267	0.725334	1.43803	-1.10494	-1.09931	0.370063	0.462091
Zm00001eb064530	844.98	-2.76053	0.530237	-5.20622	1.92726e-07	2.04474e-06	TRUE	-0.588981	1.16293	1.63539	-0.879758	-0.859017	-0.192793	-0.277766
Zm00001eb197780	113.276	-2.75943	0.661302	-4.17273	3.0097e-05	0.000197651	TRUE	-0.173158	0.276618	0.931607	-0.976751	-1.02508	1.61331	-0.646541
Zm00001eb106660	694.884	-2.75658	0.430114	-6.40895	1.46525e-10	2.60785e-09	TRUE	0.154045	1.29145	1.06067	-1.24078	-1.07952	0.387294	-0.573161
Zm00001eb320760	696.94	-2.75484	0.375494	-7.33659	2.19109e-13	5.70287e-12	TRUE	0.926612	-0.301333	0.443653	-1.28631	-1.36826	0.60584	0.979795
Zm00001eb077140	1243.76	-2.75386	0.323433	-8.51448	1.67342e-17	6.96115e-16	TRUE	0.925903	0.09989	0.61195	-1.34386	-1.39491	0.103102	0.997931
Zm00001eb066970	1947.01	-2.75036	0.433215	-6.34871	2.17126e-10	3.77906e-09	TRUE	-0.225676	0.884525	1.80761	-0.877443	-0.941097	-0.453871	-0.194049
Zm00001eb430250	1167.29	-2.74949	0.335672	-8.191	2.59075e-16	9.18746e-15	TRUE	1.25102	0.316228	0.665293	-1.30718	-1.30661	-0.258653	0.639899
Zm00001eb189830	136.314	-2.74942	0.526982	-5.21729	1.81555e-07	1.93782e-06	TRUE	-0.154171	1.14408	1.44788	-1.04142	-1.17718	0.08612	-0.305309
Zm00001eb253540	204.547	-2.74374	0.613903	-4.46934	7.84605e-06	5.93263e-05	TRUE	0.016475	0.803416	1.86499	-0.594608	-0.88579	-0.6813	-0.523182
Zm00001eb324410	2256.66	-2.73748	0.451996	-6.05642	1.39188e-09	2.1484e-08	TRUE	-0.061619	0.084227	2.06184	-0.906813	-0.893111	-0.339074	0.054544
Zm00001eb270090	3420.45	-2.73229	0.308194	-8.8655	7.61582e-19	3.68705e-17	TRUE	0.398591	0.954422	1.52867	-1.03759	-1.08467	-0.540814	-0.218602
Zm00001eb244680	5037.18	-2.73209	0.329523	-8.29105	1.12251e-16	4.16828e-15	TRUE	0.532849	0.91909	1.55603	-0.906467	-0.953144	-0.748245	-0.400109
Zm00001eb017100	651.189	-2.72902	0.382087	-7.1424	9.17181e-13	2.19027e-11	TRUE	0.148732	0.88448	1.67035	-1.10187	-0.992361	-0.202275	-0.407062
Zm00001eb408700	358.038	-2.72383	0.529619	-5.14299	2.70406e-07	2.79164e-06	TRUE	0.112702	0.867034	1.80704	-0.698857	-0.569667	-0.710591	-0.807658
Zm00001eb323860	2101.32	-2.71551	0.263126	-10.3202	5.71005e-25	4.79272e-23	TRUE	0.834206	0.975396	1.04586	-1.19609	-1.3275	-0.092053	-0.239818
Zm00001eb124790	148.533	-2.71446	0.524618	-5.17417	2.28928e-07	2.39948e-06	TRUE	0.23317	1.38582	-0.164942	-1.33435	-1.17938	0.893868	0.165816
Zm00001eb216690	482.65	-2.71431	0.833314	-3.25725	0.00112499	0.00458693	TRUE	0.970818	0.965408	0.837415	-1.20221	-1.31331	-0.461353	0.20323
Zm00001eb054670	197.734	-2.71341	0.420217	-6.45717	1.06679e-10	1.94754e-09	TRUE	0.336295	0.83786	0.704609	-1.46809	-1.34281	0.8505	0.081631
Zm00001eb312760	4176.26	-2.71303	0.598471	-4.53326	5.80791e-06	4.55418e-05	TRUE	-0.358865	1.75802	1.04901	-0.813429	-0.622908	-0.262398	-0.749425
Zm00001eb057560	601.627	-2.71273	0.486688	-5.57386	2.49155e-08	3.13599e-07	TRUE	0.906053	0.224518	1.72768	-0.68593	-0.971287	-0.666187	-0.53485
Zm00001eb029010	1342.81	-2.71251	0.296001	-9.16387	5.00701e-20	2.66271e-18	TRUE	0.356033	1.02154	1.40979	-1.18455	-1.15333	-0.162119	-0.287359
Zm00001eb244560	593.06	-2.71092	0.530033	-5.11463	3.14361e-07	3.20116e-06	TRUE	-0.624889	0.953623	0.477333	-1.13959	-1.02822	1.45197	-0.090228
Zm00001eb353460	351.703	-2.71077	0.327024	-8.28922	1.13998e-16	4.2221e-15	TRUE	1.34301	0.725236	1.08692	-0.788378	-0.789702	-0.778625	-0.79846
Zm00001eb160080	1862.82	-2.70898	0.316959	-8.5468	1.26551e-17	5.407e-16	TRUE	1.19048	0.391699	1.45334	-0.811084	-0.799008	-0.762463	-0.662962
Zm00001eb052640	290.598	-2.70831	0.383223	-7.06718	1.58112e-12	3.6233e-11	TRUE	0.950025	0.314353	0.884806	-1.31544	-1.46158	0.589641	0.038203
Zm00001eb014950	510.988	-2.70274	0.371338	-7.27838	3.37843e-13	8.52724e-12	TRUE	0.07389	0.328737	-0.062417	-1.18143	-1.2746	0.499394	1.61642
Zm00001eb170080	1513.83	-2.69987	0.423666	-6.37264	1.85798e-10	3.26585e-09	TRUE	1.62723	-0.163845	1.17821	-0.932584	-0.818423	-0.422725	-0.467856
Zm00001eb134670	740.295	-2.69974	0.322597	-8.36877	5.82228e-17	2.24427e-15	TRUE	1.37934	0.682214	1.06803	-0.896787	-0.826651	-0.616092	-0.790051
Zm00001eb153090	1884.83	-2.69895	0.376226	-7.17373	7.29791e-13	1.76356e-11	TRUE	0.030511	0.920035	1.5692	-1.06465	-1.16769	-0.419326	0.131926
Zm00001eb343720	224.779	-2.69707	0.468931	-5.75154	8.84358e-09	1.18457e-07	TRUE	0.271141	1.02749	1.25032	-1.23846	-1.12154	0.404493	-0.593445
Zm00001eb205350	286.238	-2.69476	0.525045	-5.13245	2.85999e-07	2.94191e-06	TRUE	1.90804	0.167295	0.648581	-0.523683	-0.610238	-0.799947	-0.79005
Zm00001eb197180	1295.58	-2.6824	0.428761	-6.25617	3.94537e-10	6.64669e-09	TRUE	1.08604	-0.358452	-0.324469	-1.12254	-1.20566	1.0627	0.862386
Zm00001eb356950	745.944	-2.6823	0.545169	-4.92013	8.64884e-07	7.99764e-06	TRUE	-0.506334	0.756541	1.90904	-0.805769	-0.798643	-0.070284	-0.484555
Zm00001eb057360	471.567	-2.68166	0.476074	-5.63286	1.77249e-08	2.27536e-07	TRUE	1.64602	-0.15601	-0.105422	-1.10759	-1.10817	-0.061354	0.892524
Zm00001eb155790	2884.37	-2.67917	0.361436	-7.41258	1.23862e-13	3.30261e-12	TRUE	-0.235098	0.50367	1.52742	-1.2422	-1.25259	0.319003	0.379792
Zm00001eb272400	182.237	-2.678	0.427001	-6.27164	3.57269e-10	6.05479e-09	TRUE	0.621249	0.85201	0.69022	-1.31839	-1.46823	-0.090741	0.713884
Zm00001eb387780	5869.97	-2.67655	0.32436	-8.25177	1.56068e-16	5.69106e-15	TRUE	1.41231	0.452681	0.949608	-1.10674	-1.14112	-0.608232	0.041495
Zm00001eb019580	653.602	-2.67453	0.36811	-7.26558	3.71436e-13	9.30888e-12	TRUE	1.49105	-0.058128	0.877635	-1.22019	-1.22547	0.026267	0.108831
Zm00001eb064590	930.79	-2.6725	0.412547	-6.47805	9.29125e-11	1.7028e-09	TRUE	1.48507	0.081073	0.265735	-1.19447	-1.18667	-0.330164	0.879429
Zm00001eb339100	1154.28	-2.67201	0.458557	-5.82701	5.64306e-09	7.82471e-08	TRUE	-0.385343	1.00903	1.49838	-1.0322	-1.08944	0.409607	-0.410032
Zm00001eb013670	792.514	-2.6702	0.601201	-4.44144	8.93577e-06	6.679e-05	TRUE	-0.271988	0.655784	1.98279	-0.803371	-0.598384	-0.263786	-0.701044
Zm00001eb297510	262.775	-2.66865	0.439916	-6.06627	1.30914e-09	2.03174e-08	TRUE	1.21322	0.239367	0.177806	-1.28426	-1.28283	1.06227	-0.125567
Zm00001eb273600	1071.26	-2.66768	0.34178	-7.80526	5.93769e-15	1.86341e-13	TRUE	0.402174	1.28187	1.28938	-0.941347	-1.06403	-0.635185	-0.332865
Zm00001eb126270	107.307	-2.66678	0.682636	-3.90659	9.36063e-05	0.00052905	TRUE	0.895578	-0.51828	-0.581877	-0.896104	-0.948571	1.65241	0.396839
Zm00001eb130050	318.748	-2.66642	0.557108	-4.78618	1.69986e-06	1.48659e-05	TRUE	2.09104	0.164777	0.216924	-0.704233	-0.489989	-0.63954	-0.63898
Zm00001eb043910	3181.32	-2.66238	0.313182	-8.50108	1.87833e-17	7.74538e-16	TRUE	-0.243028	0.570765	0.876736	-1.34049	-1.37113	0.62348	0.883665
Zm00001eb206330	911.934	-2.66141	0.365507	-7.28143	3.30292e-13	8.3664e-12	TRUE	-0.219505	0.230308	1.18068	-1.27876	-1.3491	0.623665	0.81271
Zm00001eb210380	828.789	-2.65028	0.479523	-5.5269	3.25937e-08	3.99604e-07	TRUE	2.12949	-0.03363	-0.034377	-0.831982	-0.828432	-0.155525	-0.245542
Zm00001eb192580	1612.52	-2.64979	0.428789	-6.1797	6.4223e-10	1.03406e-08	TRUE	1.675	0.076523	0.498626	-1.03483	-1.16927	-0.523403	0.477358
Zm00001eb151380	2785.08	-2.64682	0.333177	-7.94417	1.95495e-15	6.37492e-14	TRUE	1.09933	0.17826	0.834287	-1.26569	-1.38007	-0.188341	0.722224
Zm00001eb240920	2800.06	-2.64301	0.302007	-8.75146	2.10611e-18	9.69975e-17	TRUE	0.535264	0.802153	1.57428	-1.00597	-1.12376	-0.316271	-0.465696
Zm00001eb057230	2410.48	-2.64159	0.502303	-5.25896	1.44875e-07	1.57838e-06	TRUE	-0.287119	0.87009	1.85866	-0.788079	-0.753357	-0.21336	-0.686836
Zm00001eb039360	2683.67	-2.6405	0.308246	-8.56624	1.06923e-17	4.58219e-16	TRUE	0.754119	0.673812	0.951369	-1.31377	-1.33564	-0.377662	0.647776
Zm00001eb020460	1181.44	-2.63929	0.302186	-8.73402	2.45786e-18	1.12831e-16	TRUE	0.314871	0.880597	1.19361	-1.28323	-1.41448	0.207395	0.101243
Zm00001eb123410	733.239	-2.63877	0.371849	-7.09636	1.28086e-12	2.99325e-11	TRUE	1.33259	0.231701	0.131078	-1.25767	-1.36623	0.094173	0.834354
Zm00001eb042540	235.183	-2.63831	0.454952	-5.7991	6.66717e-09	9.17302e-08	TRUE	0.093705	1.42916	0.826435	-1.13876	-1.28735	-0.354488	0.431296
Zm00001eb273010	288.65	-2.63788	0.344074	-7.6666	1.7662e-14	5.25233e-13	TRUE	0.842319	0.761481	1.28946	-1.18285	-1.22991	-0.34195	-0.138556
Zm00001eb375180	14164.2	-2.63639	0.463403	-5.6892	1.27636e-08	1.67022e-07	TRUE	-0.299152	1.24813	1.62303	-0.762152	-0.724477	-0.65154	-0.433836
Zm00001eb210610	1241.34	-2.63397	0.246222	-10.6976	1.04483e-26	1.00604e-24	TRUE	1.15411	0.940866	1.10458	-0.759521	-0.795063	-0.803339	-0.841636
Zm00001eb097940	1491.27	-2.63349	0.256133	-10.2817	8.52016e-25	7.06775e-23	TRUE	0.998834	0.798103	1.32827	-0.998949	-0.955548	-0.536229	-0.634476
Zm00001eb326490	189.225	-2.63164	0.477864	-5.5071	3.64798e-08	4.44176e-07	TRUE	0.982248	0.232736	0.196191	-1.22407	-1.43443	0.071989	1.17534
Zm00001eb132020	1020.19	-2.6276	0.319199	-8.23184	1.84362e-16	6.67138e-15	TRUE	0.187312	0.924196	1.39622	-1.25041	-1.24707	-0.151045	0.140791
Zm00001eb040770	735.149	-2.62729	0.362782	-7.24206	4.41918e-13	1.09976e-11	TRUE	1.26264	0.629869	0.257486	-1.25167	-1.4789	0.391078	0.1895
Zm00001eb334430	1329.87	-2.62553	0.301204	-8.71678	2.86221e-18	1.29301e-16	TRUE	1.28225	0.23403	0.816416	-1.32292	-1.32181	-0.054401	0.36644
Zm00001eb167840	2013.25	-2.62186	0.302394	-8.67032	4.30891e-18	1.90411e-16	TRUE	0.79314	0.596576	1.646	-0.739583	-0.750499	-0.750484	-0.795148
Zm00001eb430340	1264.36	-2.62164	0.305047	-8.59424	8.38184e-18	3.62489e-16	TRUE	0.578455	0.422242	0.551935	-1.35502	-1.43039	0.096546	1.13624
Zm00001eb364380	6595.67	-2.62034	0.310614	-8.436	3.28381e-17	1.30845e-15	TRUE	0.625965	0.574996	1.29639	-1.28318	-1.25029	-0.421538	0.457654
Zm00001eb408880	519.894	-2.61963	0.530567	-4.93741	7.91654e-07	7.39277e-06	TRUE	2.15451	-0.121404	-0.08843	-0.744419	-0.819946	-0.325711	-0.054597
Zm00001eb211610	864.01	-2.61888	0.337102	-7.7688	7.92352e-15	2.45404e-13	TRUE	1.27076	0.158732	0.427452	-1.30183	-1.43741	0.324668	0.55763
Zm00001eb413360	140.549	-2.61756	0.439651	-5.95372	2.62116e-09	3.88924e-08	TRUE	0.705304	0.665975	1.63234	-0.950141	-0.923728	-0.553329	-0.576425
Zm00001eb093260	502.352	-2.61447	0.358261	-7.29766	2.92806e-13	7.45687e-12	TRUE	0.427834	1.11494	1.48718	-0.807671	-0.94596	-0.62285	-0.65348
Zm00001eb303920	178.084	-2.61152	0.469513	-5.5622	2.66397e-08	3.3382e-07	TRUE	0.112854	0.618344	1.84369	-1.00811	-1.00885	-0.368423	-0.189506
Zm00001eb228160	4095.6	-2.61149	0.267337	-9.76855	1.53642e-22	1.04246e-20	TRUE	1.40055	0.700681	0.645448	-1.22474	-1.2314	0.044963	-0.335506
Zm00001eb081190	1698.19	-2.61132	0.349507	-7.47144	7.93231e-14	2.18062e-12	TRUE	1.75766	0.223093	0.467658	-1.1411	-1.11667	-0.288883	0.098236
Zm00001eb135460	179.521	-2.60906	0.595599	-4.38056	1.18373e-05	8.5757e-05	TRUE	-0.463302	1.04918	1.65144	-0.896279	-0.878054	0.139882	-0.60287
Zm00001eb350830	170.559	-2.60708	0.477755	-5.45693	4.84445e-08	5.75051e-07	TRUE	0.37838	1.38906	1.26424	-0.831308	-0.732821	-0.624019	-0.84353
Zm00001eb386310	1388.38	-2.60346	0.33585	-7.75185	9.05617e-15	2.79265e-13	TRUE	1.13908	0.114094	0.108268	-1.29768	-1.37521	0.30742	1.00402
Zm00001eb334910	557.249	-2.60312	0.346417	-7.51442	5.71633e-14	1.60249e-12	TRUE	1.3401	0.289471	0.748147	-1.32621	-1.26587	-0.189788	0.40415
Zm00001eb243430	3303.04	-2.60293	0.548733	-4.74353	2.10031e-06	1.80453e-05	TRUE	-0.223956	0.97607	1.81775	-0.720008	-0.567387	-0.518369	-0.764105
Zm00001eb103060	390.971	-2.6008	0.389222	-6.68204	2.35635e-11	4.74785e-10	TRUE	1.02397	0.529106	1.08662	-1.16483	-1.46067	-0.019598	0.005406
Zm00001eb404350	862.149	-2.59906	0.412934	-6.29412	3.09153e-10	5.28992e-09	TRUE	0.961722	0.353435	1.17891	-1.10886	-1.35958	-0.503716	0.478097
Zm00001eb206470	1771.6	-2.59578	0.601073	-4.31857	1.57042e-05	0.000110444	TRUE	-0.372071	0.74082	1.78853	-0.991389	-0.736882	0.283498	-0.712511
Zm00001eb413290	1182.72	-2.59231	0.444311	-5.83446	5.39647e-09	7.51954e-08	TRUE	-0.416873	1.56457	1.07246	-0.990335	-1.11277	-0.024645	-0.09241
Zm00001eb036130	20450.8	-2.58822	0.416449	-6.21497	5.13328e-10	8.41799e-09	TRUE	0.466697	0.848558	1.45551	-1.03873	-1.04117	-0.866007	0.175143
Zm00001eb274880	624.75	-2.58578	0.435855	-5.93266	2.98057e-09	4.3587e-08	TRUE	1.93253	0.267312	0.544301	-0.58477	-0.728224	-0.690607	-0.740542
Zm00001eb356560	1733.03	-2.58453	0.339678	-7.60876	2.76741e-14	8.06073e-13	TRUE	-0.316202	0.365181	0.762712	-1.3099	-1.27629	0.522738	1.25176
Zm00001eb243810	866.582	-2.58407	0.27736	-9.31665	1.20067e-20	6.65295e-19	TRUE	0.461621	1.05625	1.03208	-1.321	-1.35654	0.143302	-0.015711
Zm00001eb356330	5937.93	-2.57204	0.447881	-5.74269	9.31817e-09	1.24228e-07	TRUE	-0.23801	1.0636	1.74872	-0.805624	-0.738371	-0.394571	-0.635744
Zm00001eb212870	187.344	-2.57181	0.447101	-5.75219	8.80933e-09	1.1811e-07	TRUE	-0.01439	0.589597	1.43263	-1.28354	-1.29516	0.521942	0.048923
Zm00001eb211430	510.099	-2.56374	0.500202	-5.1254	2.96909e-07	3.03652e-06	TRUE	-0.415954	0.715083	1.90375	-0.853552	-0.928545	-0.288146	-0.132636
Zm00001eb112220	674.85	-2.56263	0.292488	-8.76149	1.92682e-18	8.9029e-17	TRUE	1.20338	0.546661	0.581987	-1.37636	-1.37714	0.342337	0.079127
Zm00001eb361130	1947.48	-2.5583	0.311045	-8.22486	1.95416e-16	7.03547e-15	TRUE	0.319904	0.680009	1.61227	-1.20579	-1.14905	-0.248012	-0.009344
Zm00001eb329360	355.068	-2.5521	0.369407	-6.90865	4.89304e-12	1.06617e-10	TRUE	0.431244	0.62832	1.66779	-1.09448	-1.14237	-0.330411	-0.160097
Zm00001eb053630	2260.16	-2.54288	0.267222	-9.51601	1.7996e-21	1.0956e-19	TRUE	0.931846	0.249299	0.426845	-1.38434	-1.47785	0.613454	0.640746
Zm00001eb373110	1027.32	-2.54044	0.272473	-9.32364	1.12414e-20	6.25332e-19	TRUE	1.18806	0.877082	1.12528	-0.853703	-0.778625	-0.733783	-0.824309
Zm00001eb321890	427.761	-2.53818	0.311088	-8.15904	3.37695e-16	1.18864e-14	TRUE	1.03576	0.413541	0.707116	-1.41456	-1.4217	0.377749	0.302096
Zm00001eb078650	210.96	-2.53795	0.391234	-6.48703	8.75462e-11	1.61069e-09	TRUE	0.567827	0.181308	0.886933	-1.38466	-1.46877	0.462962	0.754407
Zm00001eb236980	997.01	-2.53478	0.498903	-5.0807	3.76047e-07	3.76977e-06	TRUE	2.17087	-0.026621	0.038766	-0.637766	-0.749234	-0.408361	-0.38765
Zm00001eb389520	759.278	-2.53401	0.514195	-4.92811	8.30306e-07	7.71814e-06	TRUE	-0.245596	1.77265	1.03675	-0.686098	-0.740563	-0.399981	-0.73716
Zm00001eb348700	1116.07	-2.53343	0.410194	-6.17618	6.56729e-10	1.05501e-08	TRUE	-0.113267	1.074	1.71184	-0.826415	-0.841939	-0.441928	-0.56229
Zm00001eb353180	2311.98	-2.53237	0.229753	-11.0221	2.98984e-28	3.25643e-26	TRUE	1.01066	0.971574	1.07853	-1.15246	-1.09798	-0.473486	-0.336852
Zm00001eb200320	3311.88	-2.53181	0.349944	-7.23491	4.65821e-13	1.15317e-11	TRUE	1.70881	0.141818	0.217789	-1.17852	-1.21966	-0.037076	0.366841
Zm00001eb086340	1957.96	-2.5317	0.407973	-6.20556	5.45039e-10	8.91739e-09	TRUE	1.71895	-0.065922	-0.021422	-1.1033	-1.23645	0.206462	0.501689
Zm00001eb136100	300.672	-2.52986	0.674335	-3.75164	0.000175682	0.000917209	TRUE	-0.380944	0.017553	2.20128	-0.587596	-0.563721	-0.108547	-0.578023
Zm00001eb259150	1925	-2.52658	0.408958	-6.17809	6.48805e-10	1.04346e-08	TRUE	1.93358	0.089223	0.171886	-0.98555	-1.05143	-0.33819	0.180482
Zm00001eb325880	3295.08	-2.52632	0.30252	-8.3509	6.77445e-17	2.59718e-15	TRUE	1.05441	0.656186	0.555981	-1.35057	-1.31905	-0.300155	0.703206
Zm00001eb282620	3935.19	-2.52556	0.264481	-9.5491	1.30824e-21	8.10367e-20	TRUE	1.13739	0.756797	1.27195	-0.85229	-0.768868	-0.821164	-0.723806
Zm00001eb053730	1097.64	-2.52368	0.305724	-8.25478	1.52185e-16	5.56377e-15	TRUE	1.57131	0.453906	0.884671	-1.09096	-1.01383	-0.393034	-0.412066
Zm00001eb067170	174.493	-2.52301	0.501043	-5.03551	4.76566e-07	4.65892e-06	TRUE	-0.093974	0.538178	0.583243	-1.22208	-1.18616	1.55861	-0.177815
Zm00001eb265980	719.827	-2.52138	0.494562	-5.09821	3.4288e-07	3.47163e-06	TRUE	-0.242446	0.934052	1.82281	-0.770818	-0.775029	-0.687065	-0.281504
Zm00001eb420150	618.6	-2.52113	0.285663	-8.82554	1.08937e-18	5.20296e-17	TRUE	0.416455	0.454272	0.641389	-1.48945	-1.4109	0.828514	0.559719
Zm00001eb214220	1962.48	-2.51919	0.436764	-5.76787	8.02821e-09	1.08457e-07	TRUE	2.03686	-0.039159	0.153032	-0.919989	-0.913	-0.377759	0.060018
Zm00001eb328920	325.672	-2.51804	0.344394	-7.31151	2.64158e-13	6.77593e-12	TRUE	0.651747	0.772541	0.861724	-1.43861	-1.3562	-0.059883	0.568675
Zm00001eb348450	1261.03	-2.51804	0.351454	-7.16463	7.79961e-13	1.87521e-11	TRUE	1.65229	0.332539	0.66875	-1.08453	-1.12726	-0.5104	0.068615
Zm00001eb058490	5231.71	-2.51695	0.312078	-8.06513	7.31605e-16	2.52502e-14	TRUE	0.246065	1.00889	1.58052	-1.02785	-1.01208	-0.512456	-0.283086
Zm00001eb026810	6151.69	-2.51582	0.326857	-7.69701	1.39283e-14	4.19475e-13	TRUE	0.175126	1.08501	1.41724	-1.08115	-1.20921	-0.390419	0.003399
Zm00001eb155060	517.88	-2.51345	0.46192	-5.44132	5.28883e-08	6.24144e-07	TRUE	-0.352439	0.384182	1.72468	-1.08702	-1.11037	0.568271	-0.127294
Zm00001eb025490	1365.49	-2.51184	0.505996	-4.96414	6.90068e-07	6.53459e-06	TRUE	-0.424754	1.55552	1.1333	-1.07717	-0.844756	0.13154	-0.473679
Zm00001eb332130	531.014	-2.51168	0.402285	-6.24353	4.27791e-10	7.17283e-09	TRUE	0.019511	0.79363	1.79964	-0.963585	-0.978612	-0.435441	-0.235142
Zm00001eb360900	11623.9	-2.51115	0.303655	-8.26974	1.34249e-16	4.9463e-15	TRUE	0.854789	0.388302	1.14968	-1.27354	-1.31868	-0.356386	0.55584
Zm00001eb164450	89.0695	-2.51063	0.726568	-3.45547	0.000549342	0.0024991	TRUE	-0.132011	1.26369	1.57693	-0.717855	-0.461492	-0.738675	-0.790585
Zm00001eb023100	838.962	-2.51021	0.290787	-8.63245	6.00502e-18	2.62905e-16	TRUE	0.915129	0.795612	1.40625	-0.923143	-0.958926	-0.523272	-0.711652
Zm00001eb140930	2675.88	-2.50907	0.361354	-6.94353	3.82422e-12	8.43647e-11	TRUE	1.67044	0.316919	0.922769	-0.87382	-0.86106	-0.763818	-0.411433
Zm00001eb065100	561.072	-2.50342	0.562111	-4.4536	8.44419e-06	6.35779e-05	TRUE	-0.495703	1.17788	1.65426	-0.744297	-0.79241	-0.146248	-0.653478
Zm00001eb404430	412.498	-2.50298	0.458436	-5.45983	4.76599e-08	5.66686e-07	TRUE	1.85165	0.300467	0.652553	-0.508118	-0.604133	-0.848483	-0.84393
Zm00001eb360430	835.001	-2.49934	0.29035	-8.60801	7.43414e-18	3.22487e-16	TRUE	0.503226	1.02408	1.38232	-1.12554	-1.14379	-0.379781	-0.260511
Zm00001eb141120	1453.03	-2.49833	0.382831	-6.52595	6.7574e-11	1.25792e-09	TRUE	1.69164	0.282007	0.690706	-1.00707	-1.07356	0.057896	-0.641625
Zm00001eb421500	2068.27	-2.49828	0.477369	-5.23344	1.66386e-07	1.78937e-06	TRUE	1.34587	-0.381082	-0.452226	-1.02789	-1.06936	0.354627	1.23006
Zm00001eb186660	780.133	-2.49762	0.384742	-6.49167	8.48899e-11	1.56997e-09	TRUE	-0.173294	0.359953	1.24399	-1.2304	-1.37769	0.282288	0.895149
Zm00001eb158760	973.924	-2.49684	0.3006	-8.30617	9.88429e-17	3.70922e-15	TRUE	1.23709	0.305245	0.536445	-1.33943	-1.41958	0.495075	0.185156
Zm00001eb000710	831.137	-2.49589	0.342309	-7.29135	3.06855e-13	7.78665e-12	TRUE	1.19026	0.659133	0.765905	-1.34125	-1.1934	-0.450084	0.36943
Zm00001eb148920	2299.52	-2.49587	0.316607	-7.88318	3.19155e-15	1.02426e-13	TRUE	0.227646	0.702453	1.49443	-1.21374	-1.27021	-0.228235	0.287653
Zm00001eb096860	638.751	-2.49467	0.312209	-7.99039	1.34515e-15	4.46861e-14	TRUE	0.904182	0.338122	1.21963	-1.28748	-1.3622	-0.063928	0.251678
Zm00001eb062500	87.322	-2.49089	0.667624	-3.73097	0.00019074	0.000987433	TRUE	-0.482016	1.6037	0.734445	-0.986437	-0.932409	0.668534	-0.605817
Zm00001eb293020	854.123	-2.49075	0.303861	-8.197	2.46457e-16	8.78391e-15	TRUE	0.18051	0.798977	0.850636	-1.41327	-1.38784	0.160961	0.810023
Zm00001eb169420	232.492	-2.48942	0.596685	-4.17208	3.01827e-05	0.000198122	TRUE	-0.371778	0.116533	-0.143718	-0.754221	-0.753788	2.15187	-0.244893
Zm00001eb424460	218.236	-2.4877	0.417852	-5.95353	2.62421e-09	3.88969e-08	TRUE	0.385753	0.904129	1.31752	-1.25048	-1.20177	-0.450325	0.295183
Zm00001eb331630	620.448	-2.48616	0.436299	-5.69829	1.21014e-08	1.5909e-07	TRUE	1.86523	0.072726	0.693826	-0.816447	-0.968889	-0.611197	-0.235249
Zm00001eb244500	592.713	-2.48594	0.421079	-5.90375	3.55336e-09	5.10682e-08	TRUE	1.89525	0.556077	0.349048	-0.600923	-0.735701	-0.772744	-0.691003
Zm00001eb348850	198.482	-2.48557	0.542515	-4.58156	4.6151e-06	3.69651e-05	TRUE	-0.437009	1.38898	0.827583	-1.0506	-1.15506	0.79017	-0.364065
Zm00001eb188720	841.05	-2.48198	0.353632	-7.01853	2.24212e-12	5.08574e-11	TRUE	1.66074	0.319714	0.963218	-0.869455	-0.787847	-0.58033	-0.706041
Zm00001eb100800	285.525	-2.48075	0.667037	-3.71906	0.000199963	0.00102845	TRUE	0.884358	-0.720206	-0.529951	-0.821476	-0.891615	1.66701	0.411883
Zm00001eb200500	537.775	-2.48072	0.469285	-5.28618	1.249e-07	1.38415e-06	TRUE	1.34823	-0.28838	-0.103704	-1.10275	-1.11904	-0.007162	1.27279
Zm00001eb010710	1942.08	-2.4805	0.293286	-8.45763	2.72855e-17	1.10269e-15	TRUE	0.40708	0.859773	1.56656	-1.07119	-1.14	-0.297844	-0.324377
Zm00001eb103050	471.117	-2.47986	0.310639	-7.98309	1.42711e-15	4.71879e-14	TRUE	0.923103	0.96039	1.29602	-0.863047	-0.815807	-0.819128	-0.681535
Zm00001eb119370	236.662	-2.47788	0.496121	-4.9945	5.89869e-07	5.6689e-06	TRUE	0.023127	1.17736	1.61153	-0.546515	-0.694782	-0.810387	-0.760339
Zm00001eb144570	976.329	-2.4778	0.328047	-7.55319	4.24728e-14	1.20979e-12	TRUE	0.411589	1.15361	1.43365	-1.01775	-0.895259	-0.636629	-0.449217
Zm00001eb351700	9216.67	-2.47581	0.362967	-6.82105	9.03766e-12	1.91628e-10	TRUE	-0.128552	1.1874	1.5352	-1.01853	-0.998036	-0.379575	-0.197906
Zm00001eb242390	43330	-2.47519	0.447696	-5.52873	3.22564e-08	3.96496e-07	TRUE	2.11055	-0.097086	0.067661	-0.817468	-0.862478	-0.340237	-0.060937
Zm00001eb100000	87.2205	-2.47439	0.608026	-4.06954	4.71055e-05	0.000289135	TRUE	0.06126	1.69278	0.850009	-0.870641	-1.04371	0.057053	-0.746754
Zm00001eb327810	1243.32	-2.47063	0.423357	-5.83581	5.35289e-09	7.46615e-08	TRUE	2.04075	0.044563	0.163568	-0.901249	-0.938071	-0.328262	-0.081301
Zm00001eb330020	4393.9	-2.47036	0.291351	-8.47899	2.27163e-17	9.25952e-16	TRUE	1.09789	0.598401	1.11088	-1.22796	-1.18043	-0.532314	0.133539
Zm00001eb132880	1980.7	-2.46997	0.254789	-9.6942	3.19128e-22	2.11534e-20	TRUE	1.12451	0.748392	0.524442	-1.33509	-1.43029	0.137022	0.231017
Zm00001eb144670	919.928	-2.46903	0.324765	-7.60251	2.90442e-14	8.42521e-13	TRUE	0.598876	0.800344	1.63709	-0.745555	-0.662827	-0.798655	-0.829272
Zm00001eb220420	402.721	-2.46893	0.486446	-5.07545	3.86587e-07	3.85898e-06	TRUE	2.11795	-0.020388	0.158196	-0.832315	-0.756304	-0.305448	-0.361688
Zm00001eb364140	175.585	-2.46892	0.615576	-4.01075	6.05269e-05	0.000361657	TRUE	-0.277848	0.593757	-0.539936	-0.913244	-0.84273	1.93189	0.048112
Zm00001eb277540	454.532	-2.46756	0.422499	-5.84038	5.2081e-09	7.27135e-08	TRUE	1.15233	0.854784	1.14345	-0.74225	-1.11745	-0.620754	-0.670103
Zm00001eb385490	550.026	-2.467	0.393131	-6.27526	3.49041e-10	5.93663e-09	TRUE	1.68545	0.177793	0.614788	-1.05556	-1.2584	-0.220647	0.056574
Zm00001eb220980	253.424	-2.45454	0.354185	-6.93011	4.2052e-12	9.21959e-11	TRUE	0.728095	0.796615	1.21093	-1.33334	-1.24291	-0.209321	0.049924
Zm00001eb188570	3073.49	-2.45055	0.241971	-10.1275	4.17358e-24	3.25287e-22	TRUE	0.222591	0.51462	0.126197	-1.35476	-1.41186	0.829453	1.07376
Zm00001eb415640	1384.7	-2.44986	0.555138	-4.41306	1.01918e-05	7.50236e-05	TRUE	-0.08488	1.11397	1.60489	-0.962845	-0.696594	-0.107128	-0.867412
Zm00001eb163640	139.503	-2.44961	0.448841	-5.45763	4.82533e-08	5.73261e-07	TRUE	0.547169	0.315913	1.35771	-1.32056	-1.34134	-0.021414	0.462517
Zm00001eb287910	296.206	-2.44866	0.361342	-6.77658	1.23051e-11	2.57825e-10	TRUE	1.10447	0.57677	1.33233	-1.14687	-0.979493	-0.39823	-0.488965
Zm00001eb373920	61.055	-2.44607	0.691045	-3.53966	0.000400638	0.00189183	TRUE	0.516423	1.1638	1.37725	-0.727176	-0.886831	-0.471742	-0.971728
Zm00001eb247490	91.6531	-2.44182	0.549201	-4.44613	8.74305e-06	6.54806e-05	TRUE	0.236252	0.631055	1.89136	-0.736366	-0.852635	-0.497038	-0.672631
Zm00001eb076250	120.225	-2.43542	0.740268	-3.28992	0.00100217	0.0041591	TRUE	1.95246	0.411546	0.312774	-0.574137	-0.974958	-0.612236	-0.51545
Zm00001eb225610	1596.99	-2.43289	0.267785	-9.08523	1.03477e-19	5.29901e-18	TRUE	0.487749	0.964675	1.2725	-1.22146	-1.30055	-0.165771	-0.037147
Zm00001eb170730	733.432	-2.42417	0.301912	-8.02941	9.79394e-16	3.32361e-14	TRUE	0.281315	0.315976	0.118252	-1.29389	-1.44066	0.91154	1.10747
Zm00001eb370650	5172.79	-2.42415	0.42944	-5.6449	1.65279e-08	2.13329e-07	TRUE	0.559846	0.143522	0.965285	-1.25532	-1.10552	-0.574954	1.26714
Zm00001eb329440	354.439	-2.42336	0.373508	-6.4881	8.69272e-11	1.60346e-09	TRUE	0.586317	0.355672	0.408139	-1.52778	-1.29999	0.387131	1.09051
Zm00001eb054680	35433.7	-2.42276	0.291221	-8.31932	8.84686e-17	3.34647e-15	TRUE	0.448436	0.816674	1.62833	-1.0652	-0.984951	-0.521994	-0.321298
Zm00001eb116730	1118.32	-2.4221	0.375853	-6.44428	1.1615e-10	2.10151e-09	TRUE	0.302182	0.777784	1.61249	-1.09483	-1.03997	-0.644839	0.08719
Zm00001eb291190	1818.8	-2.41951	0.431074	-5.61275	1.99136e-08	2.53113e-07	TRUE	0.804513	0.78482	1.49688	-0.780658	-0.840248	-0.501154	-0.964148
Zm00001eb291800	463.863	-2.41819	0.572678	-4.22259	2.41506e-05	0.000162359	TRUE	1.51589	-0.484091	-0.606891	-0.938387	-1.00435	0.929561	0.588268
Zm00001eb055560	2280.87	-2.41812	0.252736	-9.56775	1.09253e-21	6.85734e-20	TRUE	0.684643	0.520799	1.12721	-1.36507	-1.40075	0.029359	0.403808
Zm00001eb103300	577.012	-2.41717	0.310519	-7.7843	7.00989e-15	2.19021e-13	TRUE	0.586638	0.672679	0.481108	-1.38151	-1.46372	0.946461	0.15834
Zm00001eb005130	1127.57	-2.4131	0.392222	-6.15239	7.63246e-10	1.2157e-08	TRUE	1.30151	0.488815	0.972955	-1.10726	-1.09998	0.236718	-0.792762
Zm00001eb151070	700.47	-2.41304	0.264498	-9.12307	7.30229e-20	3.8364e-18	TRUE	1.13501	0.825021	1.14329	-1.03754	-1.07587	-0.490153	-0.499757
Zm00001eb233510	14719	-2.4123	0.354089	-6.81269	9.57872e-12	2.02797e-10	TRUE	0.086327	0.829798	1.68456	-1.02945	-1.06195	-0.527629	0.018348
Zm00001eb246810	385.428	-2.41086	0.439822	-5.48144	4.21867e-08	5.05421e-07	TRUE	-0.152379	1.65943	0.775038	-1.05122	-1.152	0.26643	-0.345292
Zm00001eb154820	3380.71	-2.40852	0.486928	-4.94637	7.56115e-07	7.09358e-06	TRUE	0.993134	0.135109	0.481125	-1.03259	-1.15149	1.33774	-0.763025
Zm00001eb275050	1279.54	-2.40852	0.314315	-7.66276	1.81977e-14	5.38903e-13	TRUE	0.604857	0.588467	1.71013	-0.998328	-0.946202	-0.555519	-0.403408
Zm00001eb433770	2770.69	-2.40813	0.51341	-4.69045	2.72599e-06	2.28806e-05	TRUE	-0.214236	1.89114	0.860393	-0.613918	-0.522548	-0.644179	-0.756648
Zm00001eb287520	442.659	-2.40632	0.31201	-7.71232	1.23555e-14	3.76101e-13	TRUE	0.761087	0.831425	1.24178	-1.21032	-1.26255	-0.002862	-0.358556
Zm00001eb388100	371.338	-2.40351	0.454475	-5.28854	1.23297e-07	1.36959e-06	TRUE	-0.014244	0.792746	0.324262	-1.33341	-1.13044	1.48181	-0.120719
Zm00001eb008810	245.943	-2.39914	0.473082	-5.0713	3.95113e-07	3.93035e-06	TRUE	0.744596	0.303476	1.70407	-1.08949	-0.874125	-0.087955	-0.700569
Zm00001eb032790	396.18	-2.39876	0.481265	-4.98427	6.21948e-07	5.96104e-06	TRUE	2.07181	0.201916	0.239618	-0.534788	-0.548977	-0.724829	-0.704748
Zm00001eb321750	1590.63	-2.39774	0.311401	-7.69986	1.36217e-14	4.11116e-13	TRUE	0.226048	0.822553	1.43064	-1.20982	-1.29578	-0.189958	0.216322
Zm00001eb163860	1437.51	-2.39752	0.55469	-4.32226	1.54437e-05	0.000109044	TRUE	-0.069263	1.14069	1.64532	-0.933954	-0.554229	-0.451749	-0.776813
Zm00001eb313000	16144	-2.39263	0.322531	-7.4183	1.1863e-13	3.18104e-12	TRUE	0.389772	1.10528	1.39885	-1.02043	-1.06999	-0.685206	-0.118272
Zm00001eb023540	216.402	-2.3913	0.515966	-4.63461	3.57616e-06	2.92739e-05	TRUE	1.75344	0.123011	0.601681	-0.967348	-1.00042	0.235455	-0.745825
Zm00001eb187290	180.083	-2.38841	0.664841	-3.59245	0.000327582	0.00158268	TRUE	2.00709	0.013191	-0.500724	-0.787841	-0.740852	0.529503	-0.520362
Zm00001eb400290	1409.84	-2.38827	0.264195	-9.0398	1.5696e-19	7.92342e-18	TRUE	0.895595	0.948842	1.32763	-0.773804	-0.689956	-0.876891	-0.831417
Zm00001eb229640	1690.67	-2.38774	0.256765	-9.29931	1.41363e-20	7.77222e-19	TRUE	1.29075	0.638114	1.13461	-1.01406	-1.05411	-0.545893	-0.44942
Zm00001eb355980	540.473	-2.3856	0.696608	-3.4246	0.000615714	0.00275779	TRUE	0.222795	2.16516	-0.644357	-0.587776	-0.571136	-0.244271	-0.340418
Zm00001eb108820	800.345	-2.38524	0.274104	-8.70195	3.26231e-18	1.45522e-16	TRUE	0.815894	0.413795	0.996062	-1.38022	-1.44406	0.271645	0.326881
Zm00001eb085610	87.9212	-2.38502	0.773838	-3.08207	0.00205568	0.00763145	TRUE	-0.435854	-0.273043	-0.380702	-0.517127	-0.517127	2.24521	-0.121359
Zm00001eb309950	1351.74	-2.37828	0.399329	-5.95569	2.58977e-09	3.85072e-08	TRUE	-0.173643	1.49663	1.3	-0.978003	-0.885144	-0.304722	-0.455115
Zm00001eb155270	1030.82	-2.37775	0.350702	-6.77998	1.20197e-11	2.52217e-10	TRUE	0.7626	0.377315	0.867786	-1.25644	-1.53813	0.026727	0.760143
Zm00001eb415690	1486.53	-2.37595	0.446039	-5.32679	9.9964e-08	1.13348e-06	TRUE	2.09244	-0.156109	0.185223	-0.846966	-0.875148	-0.197124	-0.202313
Zm00001eb205750	74.2871	-2.3731	0.688092	-3.44881	0.00056306	0.00255421	TRUE	-0.589843	1.8869	0.751942	-0.808964	-0.805816	0.03613	-0.470345
Zm00001eb180330	580.16	-2.37301	0.285956	-8.2985	1.05431e-16	3.93563e-15	TRUE	1.29313	0.855715	0.909407	-1.0585	-1.11409	-0.528683	-0.35698
Zm00001eb224280	748.803	-2.36716	0.318949	-7.42176	1.15574e-13	3.10495e-12	TRUE	1.58872	0.486804	0.603032	-1.17876	-1.17913	-0.01186	-0.308813
Zm00001eb110710	1445.13	-2.36643	0.356008	-6.64712	2.98892e-11	5.90498e-10	TRUE	1.53884	-0.089998	0.440721	-1.21354	-1.29456	0.097381	0.521153
Zm00001eb364210	2674.05	-2.3658	0.325417	-7.27007	3.59311e-13	9.03692e-12	TRUE	0.058959	0.289227	1.12243	-1.27769	-1.40134	0.200061	1.00835
Zm00001eb208310	3709.7	-2.3652	0.429989	-5.5006	3.78491e-08	4.58488e-07	TRUE	1.39032	-0.32249	-0.412724	-1.10419	-1.14088	0.732499	0.857476
Zm00001eb039590	804.726	-2.36453	0.46394	-5.09663	3.45746e-07	3.49815e-06	TRUE	-0.702585	0.985438	1.23374	-1.14531	-1.17416	0.417	0.385871
Zm00001eb097950	113.508	-2.36282	0.628106	-3.76182	0.000168681	0.000887181	TRUE	0.090777	-0.352164	-0.464759	-0.762941	-0.84005	2.07329	0.25585
Zm00001eb432260	329.365	-2.35953	0.363579	-6.48974	8.59826e-11	1.5881e-09	TRUE	0.641033	0.197522	0.968042	-1.42504	-1.34821	0.097748	0.868904
Zm00001eb187050	154.822	-2.35774	0.444629	-5.30272	1.1409e-07	1.28035e-06	TRUE	1.63498	0.410817	0.942497	-0.771767	-0.876652	-0.733102	-0.606777
Zm00001eb255190	410.756	-2.35604	0.3118	-7.55626	4.14833e-14	1.18398e-12	TRUE	0.962929	0.61507	0.567485	-1.37275	-1.48643	0.466	0.247693
Zm00001eb206050	1930.58	-2.35557	0.338724	-6.95425	3.54443e-12	7.85589e-11	TRUE	1.35741	0.05665	0.944238	-1.22724	-1.21899	0.409157	-0.321224
Zm00001eb224050	2146.28	-2.35399	0.367229	-6.41014	1.4539e-10	2.59415e-09	TRUE	1.73241	0.247618	0.15844	-1.09903	-1.27161	0.290061	-0.057889
Zm00001eb038640	592.888	-2.35353	0.407209	-5.77967	7.48465e-09	1.02185e-07	TRUE	0.474735	0.859713	1.42243	-0.990246	-1.34906	-0.458272	0.040697
Zm00001eb095690	215.774	-2.3505	0.519931	-4.52079	6.16086e-06	4.78073e-05	TRUE	2.12388	0.092673	0.167705	-0.703905	-0.644767	-0.46784	-0.567747
Zm00001eb249970	1386.15	-2.34981	0.311719	-7.53824	4.76351e-14	1.34871e-12	TRUE	0.745815	0.043217	-0.162767	-1.27224	-1.33441	0.824067	1.15632
Zm00001eb066850	663.616	-2.34961	0.445589	-5.27305	1.34172e-07	1.47537e-06	TRUE	2.05408	0.340145	0.162543	-0.636205	-0.610737	-0.615784	-0.694042
Zm00001eb190820	363.671	-2.3495	0.426997	-5.50237	3.74711e-08	4.55075e-07	TRUE	0.598376	0.67683	1.23866	-1.11206	-1.54638	-0.002339	0.146911
Zm00001eb120260	1193.76	-2.34841	0.411935	-5.70094	1.19149e-08	1.57075e-07	TRUE	1.93836	-0.030683	0.089402	-1.0214	-1.06898	-0.100827	0.194128
Zm00001eb213200	259.902	-2.34715	0.541009	-4.33847	1.43477e-05	0.000102016	TRUE	-0.37576	0.283149	0.020558	-0.873781	-0.926201	2.03251	-0.160481
Zm00001eb412040	1078.87	-2.34621	0.31311	-7.49322	6.72035e-14	1.87285e-12	TRUE	0.130058	0.936792	1.41747	-1.2537	-1.23469	-0.002875	0.006954
Zm00001eb045950	723.328	-2.34363	0.361519	-6.48272	9.00848e-11	1.65525e-09	TRUE	0.787592	0.757016	1.22558	-1.09603	-1.30356	-0.594795	0.224189
Zm00001eb372220	7311.89	-2.3432	0.455492	-5.14433	2.68471e-07	2.77368e-06	TRUE	-0.247676	1.22629	1.64312	-0.587831	-0.596683	-0.736774	-0.700443
Zm00001eb018460	674.178	-2.34132	0.375044	-6.24277	4.29877e-10	7.1908e-09	TRUE	1.34312	0.94333	0.858197	-0.798531	-0.901616	-0.916921	-0.527581
Zm00001eb033930	407.097	-2.33998	0.529682	-4.41771	9.9754e-06	7.35452e-05	TRUE	-0.173476	1.09924	1.63389	-0.935881	-0.760918	-0.067529	-0.795328
Zm00001eb221710	724.291	-2.33966	0.351252	-6.66092	2.72119e-11	5.43663e-10	TRUE	0.544306	0.725881	1.65337	-0.883703	-1.10488	-0.420482	-0.514485
Zm00001eb155910	459.439	-2.33842	0.353969	-6.60628	3.94091e-11	7.63686e-10	TRUE	1.45298	0.252112	0.405907	-1.32126	-1.29604	0.021937	0.484361
Zm00001eb378110	223.714	-2.33569	0.489724	-4.76939	1.84785e-06	1.60415e-05	TRUE	1.74756	-0.109546	0.47704	-1.03693	-1.12113	0.453591	-0.410581
Zm00001eb372600	114.969	-2.3345	0.521803	-4.47391	7.68006e-06	5.82576e-05	TRUE	1.85553	0.344084	0.44956	-0.866298	-1.08561	-0.528068	-0.169193
Zm00001eb404930	214.116	-2.33323	0.50981	-4.57667	4.72443e-06	3.77768e-05	TRUE	-0.257227	0.705995	1.93129	-0.873945	-0.835743	-0.431562	-0.23881
Zm00001eb066910	736.22	-2.33204	0.35539	-6.56192	5.31198e-11	1.00871e-09	TRUE	1.58883	0.512062	0.922739	-0.975109	-0.752939	-0.69738	-0.598209
Zm00001eb322670	264.885	-2.33136	0.539495	-4.32137	1.55065e-05	0.000109324	TRUE	-0.566507	-0.069304	1.2731	-1.01773	-1.09147	1.34552	0.126395
Zm00001eb145680	201.086	-2.33022	0.725667	-3.21114	0.00132208	0.00525904	TRUE	1.35256	-0.421938	-0.077668	-0.970971	-1.30592	0.309162	1.11478
Zm00001eb323630	719.912	-2.32491	0.303778	-7.65332	1.95861e-14	5.7881e-13	TRUE	1.25513	0.631584	1.24092	-0.857394	-0.862396	-0.614466	-0.793378
Zm00001eb137610	733.911	-2.31662	0.39712	-5.83355	5.42588e-09	7.54569e-08	TRUE	-0.346491	-0.41305	-0.357761	-0.792688	-0.881893	1.02315	1.76873
Zm00001eb018830	3084.99	-2.31595	0.392381	-5.90229	3.585e-09	5.14188e-08	TRUE	-0.207455	1.14524	1.64662	-0.925962	-0.879181	-0.392986	-0.38628
Zm00001eb031360	6236.52	-2.31207	0.389858	-5.93053	3.01954e-09	4.41114e-08	TRUE	1.59504	0.165253	0.898234	-0.963267	-1.07806	-0.721603	0.104406
Zm00001eb260730	845.734	-2.31192	0.337256	-6.85508	7.12727e-12	1.5272e-10	TRUE	0.477388	0.967464	1.54806	-0.89102	-0.984492	-0.72024	-0.397161
Zm00001eb278300	701.32	-2.30907	0.473339	-4.87826	1.07023e-06	9.73782e-06	TRUE	-0.265488	0.830573	1.15895	-1.03788	-1.23931	-0.475228	1.02838
Zm00001eb329780	1796.65	-2.30738	0.326236	-7.07273	1.5191e-12	3.49245e-11	TRUE	0.790601	0.986804	1.34857	-0.957233	-0.846585	-0.855327	-0.466833
Zm00001eb057040	863.271	-2.3068	0.313909	-7.34861	2.00272e-13	5.26085e-12	TRUE	1.36546	0.565581	0.544231	-1.25945	-1.31353	-0.269821	0.367534
Zm00001eb241240	1217.55	-2.30639	0.346399	-6.6582	2.77199e-11	5.51481e-10	TRUE	0.147031	1.7652	0.673926	-1.02793	-1.11917	-0.256187	-0.182868
Zm00001eb365700	1057.44	-2.30609	0.337014	-6.8427	7.77122e-12	1.66016e-10	TRUE	1.0152	0.30748	0.175138	-1.30499	-1.34792	0.004342	1.15075
Zm00001eb302580	787.815	-2.30523	0.370199	-6.22701	4.75428e-10	7.86925e-09	TRUE	1.83337	0.610004	0.353421	-0.817628	-0.993786	-0.500376	-0.485007
Zm00001eb153880	1330.31	-2.30155	0.350456	-6.56732	5.12297e-11	9.75426e-10	TRUE	0.381973	0.795074	1.50896	-1.08868	-1.17184	-0.597478	0.171985
Zm00001eb100100	3150.46	-2.30136	0.386517	-5.9541	2.61513e-09	3.88436e-08	TRUE	1.12623	0.64287	1.29857	-0.925912	-0.885994	-0.945118	-0.310643
Zm00001eb409840	878.62	-2.29999	0.428125	-5.37223	7.77671e-08	8.94668e-07	TRUE	1.21249	0.002178	-0.107745	-1.14105	-1.45254	0.769223	0.717438
Zm00001eb318350	1054.88	-2.29878	0.342334	-6.71503	1.88028e-11	3.83469e-10	TRUE	1.27357	0.922298	0.95922	-0.879868	-0.878739	-0.491039	-0.905439
Zm00001eb325000	564.1	-2.2979	0.318475	-7.21533	5.38051e-13	1.32275e-11	TRUE	1.07323	1.11303	0.355381	-1.3809	-1.23756	0.182734	-0.105908
Zm00001eb084350	1034.77	-2.29678	0.324837	-7.07054	1.54331e-12	3.54237e-11	TRUE	0.547184	1.13664	1.39081	-0.814209	-0.994598	-0.73527	-0.53056
Zm00001eb056490	327.847	-2.29676	0.392311	-5.85444	4.78609e-09	6.7152e-08	TRUE	1.07637	0.039093	1.52456	-1.1302	-1.06555	-0.267737	-0.176536
Zm00001eb145140	1676.27	-2.29664	0.44513	-5.15948	2.47633e-07	2.57717e-06	TRUE	-0.292395	1.12591	1.70975	-0.80945	-0.75313	-0.591055	-0.389634
Zm00001eb117000	244.866	-2.29524	0.574396	-3.99591	6.44461e-05	0.000381539	TRUE	-0.327457	0.102677	1.71267	-0.946935	-0.944057	0.936329	-0.533231
Zm00001eb048850	555.382	-2.2938	0.418258	-5.48417	4.15413e-08	4.99376e-07	TRUE	0.041585	1.08328	1.66752	-0.729455	-0.918547	-0.654414	-0.48997
Zm00001eb366380	864.152	-2.29361	0.34835	-6.5842	4.57346e-11	8.75499e-10	TRUE	0.619108	0.2276	1.04838	-1.25343	-1.46692	-0.035898	0.861157
Zm00001eb272470	375.036	-2.29297	0.38409	-5.96988	2.37427e-09	3.54516e-08	TRUE	0.221374	1.02351	1.33182	-1.10218	-1.38142	-0.013316	-0.079787
Zm00001eb022960	327.597	-2.29194	0.364813	-6.28251	3.33159e-10	5.68695e-09	TRUE	0.486345	0.657453	1.61137	-1.17618	-1.09216	-0.101955	-0.384874
Zm00001eb421320	732.338	-2.28909	0.340895	-6.71493	1.88152e-11	3.83469e-10	TRUE	0.24945	0.781016	1.72218	-1.03937	-1.02014	-0.365094	-0.32804
Zm00001eb047910	387.36	-2.28894	0.459645	-4.97981	6.36456e-07	6.07545e-06	TRUE	-0.176859	0.974862	1.8102	-0.745963	-0.75914	-0.537839	-0.565259
Zm00001eb370450	135.053	-2.28854	0.529842	-4.31929	1.56531e-05	0.000110232	TRUE	0.044983	0.932144	1.78461	-0.585381	-0.610036	-0.745929	-0.820387
Zm00001eb374630	721.239	-2.28804	0.356029	-6.42657	1.3052e-10	2.34061e-09	TRUE	0.416024	0.880103	1.64328	-0.96925	-0.866065	-0.389309	-0.71478
Zm00001eb158920	195.653	-2.28732	0.613177	-3.73028	0.00019127	0.000989483	TRUE	-0.221564	0.987176	1.80225	-0.535819	-0.766605	-0.470194	-0.795245
Zm00001eb410760	470.651	-2.28549	0.457572	-4.99483	5.88876e-07	5.66319e-06	TRUE	0.760634	1.0534	1.04784	-1.39734	-0.924386	-0.631252	0.091104
Zm00001eb379630	137.869	-2.28476	0.497688	-4.59073	4.41689e-06	3.54576e-05	TRUE	0.240152	1.34946	1.37516	-0.681033	-0.799948	-0.855207	-0.628583
Zm00001eb266720	1163.85	-2.28347	0.295843	-7.71853	1.1768e-14	3.60538e-13	TRUE	0.847656	0.389606	1.13482	-1.3255	-1.34097	-0.201653	0.496041
Zm00001eb307280	432.539	-2.28259	0.36629	-6.23163	4.61605e-10	7.65833e-09	TRUE	-0.028386	1.01107	1.03555	-1.26258	-1.4207	0.144192	0.520851
Zm00001eb245220	359.573	-2.28027	0.395022	-5.77252	7.80948e-09	1.06007e-07	TRUE	-0.109115	0.922035	0.671089	-1.29091	-1.33309	1.11507	0.024915
Zm00001eb242740	372.686	-2.27763	0.588445	-3.87058	0.000108576	0.000602325	TRUE	2.23012	-0.18537	-0.057241	-0.494236	-0.507243	-0.517935	-0.468094
Zm00001eb409530	2341.34	-2.27612	0.304541	-7.47391	7.78453e-14	2.14832e-12	TRUE	0.954639	0.859948	1.00604	-1.12707	-1.34452	-0.489251	0.140214
Zm00001eb188320	303.994	-2.27407	0.411216	-5.53011	3.20029e-08	3.93722e-07	TRUE	-0.199709	0.240956	1.09156	-1.3424	-1.25323	0.365345	1.09748
Zm00001eb152790	5751.01	-2.27207	0.386169	-5.88361	4.01403e-09	5.72827e-08	TRUE	1.61591	0.433827	0.641776	-1.02076	-1.04789	-0.788263	0.165409
Zm00001eb089390	2675.31	-2.26997	0.271059	-8.37447	5.54748e-17	2.15592e-15	TRUE	1.10011	0.692682	1.31317	-1.00774	-0.919531	-0.711411	-0.467279
Zm00001eb216600	285.25	-2.26845	0.410639	-5.52421	3.3098e-08	4.05436e-07	TRUE	1.23571	0.461207	0.812226	-1.16084	-1.31868	-0.521629	0.492003
Zm00001eb434010	1966.23	-2.26693	0.260132	-8.71454	2.91944e-18	1.31467e-16	TRUE	0.893649	0.660653	0.692591	-1.39838	-1.3919	-0.078116	0.621509
Zm00001eb098850	204.252	-2.26498	0.506552	-4.47137	7.77212e-06	5.87987e-05	TRUE	1.85336	-0.046584	0.105442	-0.984172	-1.13389	-0.268742	0.474581
Zm00001eb063990	6656.85	-2.26381	0.317911	-7.1209	1.07224e-12	2.53074e-11	TRUE	0.708867	-0.023586	0.262338	-1.25721	-1.29984	0.147893	1.46154
Zm00001eb125340	470.984	-2.25896	0.43384	-5.2069	1.92023e-07	2.03881e-06	TRUE	-0.325118	0.385094	-0.024142	-1.01249	-1.07829	1.87781	0.17714
Zm00001eb012470	3262.56	-2.25823	0.497402	-4.54005	5.62404e-06	4.42714e-05	TRUE	1.64339	-0.200924	1.09253	-0.800849	-0.839902	-0.846276	-0.047967
Zm00001eb000680	2085.47	-2.25802	0.366733	-6.15713	7.4077e-10	1.18331e-08	TRUE	-0.146562	0.717462	1.53581	-1.22589	-1.15282	-0.207693	0.479696
Zm00001eb377990	134.497	-2.25664	0.436459	-5.17034	2.3367e-07	2.4426e-06	TRUE	1.11844	0.904654	1.1461	-0.989141	-0.826824	-0.536056	-0.817168
Zm00001eb132980	248.041	-2.25636	0.398712	-5.65913	1.52146e-08	1.97456e-07	TRUE	0.053318	0.846458	1.39759	-1.25966	-1.27781	0.318845	-0.078737
Zm00001eb156610	18768.2	-2.25008	0.359469	-6.25946	3.86317e-10	6.5237e-09	TRUE	-0.011763	1.27557	1.5427	-0.799847	-0.753916	-0.63081	-0.621932
Zm00001eb353660	4288.01	-2.24406	0.282882	-7.93284	2.14185e-15	6.96837e-14	TRUE	0.938796	0.862773	1.32665	-0.931855	-0.94915	-0.807022	-0.440188
Zm00001eb060640	2262.72	-2.24224	0.402488	-5.57096	2.53338e-08	3.18299e-07	TRUE	1.58778	0.057435	-0.235438	-1.1047	-1.25787	0.190295	0.762499
Zm00001eb122210	2497.76	-2.23943	0.54281	-4.12562	3.69742e-05	0.000236252	TRUE	2.19866	-0.208652	-0.061982	-0.565037	-0.754252	-0.15422	-0.454514
Zm00001eb326060	397.405	-2.23618	0.566048	-3.95052	7.7981e-05	0.000450758	TRUE	1.67102	-0.538328	-0.313719	-0.888461	-1.0257	0.982528	0.112654
Zm00001eb185680	100.426	-2.23492	0.641527	-3.48374	0.000494452	0.00227352	TRUE	-0.192086	1.52445	1.04638	-0.96016	-0.870635	0.323596	-0.871551
Zm00001eb274200	1398	-2.23474	0.335125	-6.66835	2.58687e-11	5.1902e-10	TRUE	1.43858	0.028766	0.680671	-1.23944	-1.28814	-0.125476	0.50504
Zm00001eb327950	834.553	-2.23448	0.328019	-6.81204	9.62231e-12	2.03416e-10	TRUE	0.372952	0.389263	1.0919	-1.31557	-1.38884	-0.07288	0.923169
Zm00001eb319670	1674.87	-2.22942	0.334766	-6.65963	2.74509e-11	5.46897e-10	TRUE	-0.253199	0.727567	0.01139	-1.24314	-1.22068	1.44432	0.53375
Zm00001eb015020	2915.83	-2.22837	0.36238	-6.14927	7.78416e-10	1.23649e-08	TRUE	0.271025	0.855624	1.74567	-0.842992	-0.778621	-0.470323	-0.780384
Zm00001eb119240	1024.73	-2.22559	0.310424	-7.16952	7.52636e-13	1.81567e-11	TRUE	0.208139	1.07461	1.21292	-1.27314	-1.25831	-0.232953	0.268736
Zm00001eb196210	171.542	-2.22343	0.490617	-4.53191	5.84536e-06	4.57597e-05	TRUE	1.8759	0.401776	0.538848	-0.768681	-0.519781	-0.745758	-0.782308
Zm00001eb208200	1515.9	-2.22171	0.576639	-3.85287	0.000116742	0.000642604	TRUE	-0.439036	1.21304	1.6674	-0.730747	-0.498053	-0.467871	-0.744729
Zm00001eb139780	408.641	-2.22115	0.320903	-6.92157	4.46674e-12	9.77789e-11	TRUE	0.544961	1.21196	1.17851	-1.07505	-1.21783	-0.324316	-0.318232
Zm00001eb250950	624.427	-2.22006	0.395728	-5.61008	2.02238e-08	2.56826e-07	TRUE	0.232765	0.825237	1.7938	-0.663714	-0.702361	-0.673757	-0.811974
Zm00001eb285450	26153.9	-2.21989	0.346273	-6.41081	1.44746e-10	2.58734e-09	TRUE	0.122218	1.17837	1.58445	-0.677669	-0.72116	-0.77731	-0.708892
Zm00001eb372770	1530.69	-2.21706	0.366819	-6.044	1.50343e-09	2.31303e-08	TRUE	1.46613	0.035595	0.162144	-1.183	-1.31498	0.000906	0.833209
Zm00001eb029570	634.494	-2.21662	0.399354	-5.55051	2.84834e-08	3.54108e-07	TRUE	-0.179494	1.1007	1.37909	-1.30162	-1.06608	0.137009	-0.069603
Zm00001eb154490	41414.7	-2.21617	0.315621	-7.02162	2.19306e-12	4.98534e-11	TRUE	0.979477	0.460178	1.47133	-1.04408	-1.02065	-0.718194	-0.128057
Zm00001eb054890	144.426	-2.21507	0.493425	-4.48917	7.1502e-06	5.46474e-05	TRUE	0.329202	0.534615	1.26126	-1.12381	-1.53715	-0.082545	0.618421
Zm00001eb039760	8314.08	-2.21486	0.275206	-8.048	8.41567e-16	2.88349e-14	TRUE	0.666048	0.65645	1.63417	-0.985982	-0.993739	-0.393455	-0.583491
Zm00001eb152340	1031.24	-2.21417	0.449833	-4.9222	8.55759e-07	7.93395e-06	TRUE	2.12307	0.077515	0.175671	-0.639784	-0.739619	-0.533584	-0.463272
Zm00001eb362700	1058.02	-2.21287	0.408975	-5.41075	6.27596e-08	7.33316e-07	TRUE	1.92774	-0.106945	0.202025	-1.10552	-1.00059	-0.007095	0.090392
Zm00001eb178710	369.62	-2.206	0.353877	-6.2338	4.55247e-10	7.56169e-09	TRUE	1.27027	0.337141	1.31093	-1.00241	-1.08261	-0.293913	-0.539412
Zm00001eb258550	6205.35	-2.20538	0.435396	-5.06523	4.07911e-07	4.03502e-06	TRUE	1.52924	-0.267263	-0.32951	-1.03937	-1.17929	0.945793	0.340397
Zm00001eb363430	3011.33	-2.20444	0.266781	-8.2631	1.41938e-16	5.21604e-15	TRUE	0.743354	0.608476	1.06532	-1.32015	-1.3811	-0.212703	0.496795
Zm00001eb137820	2672.62	-2.20368	0.317621	-6.9381	3.97397e-12	8.73966e-11	TRUE	1.65861	0.303645	0.957507	-0.916478	-0.850357	-0.654939	-0.497992
Zm00001eb384690	1337.57	-2.19929	0.335191	-6.56131	5.33356e-11	1.01145e-09	TRUE	0.019433	1.31773	1.35597	-1.07166	-1.05667	-0.278104	-0.286703
Zm00001eb149010	411.77	-2.19877	0.409024	-5.37564	7.63104e-08	8.78622e-07	TRUE	-0.114387	0.558765	1.78073	-1.1256	-1.10222	-0.103166	0.10587
Zm00001eb007180	1326.39	-2.19768	0.357212	-6.15231	7.63618e-10	1.2157e-08	TRUE	1.48139	0.125454	0.111925	-1.20306	-1.32716	0.059841	0.751619
Zm00001eb345240	3588.42	-2.19662	0.28134	-7.80771	5.8235e-15	1.83163e-13	TRUE	1.34076	0.527228	1.18697	-0.907274	-1.00667	-0.688837	-0.452179
Zm00001eb078460	5235.31	-2.19582	0.441816	-4.96998	6.69588e-07	6.36602e-06	TRUE	-0.329595	1.09327	1.73233	-0.800928	-0.764366	-0.600051	-0.330666
Zm00001eb297420	634.948	-2.19573	0.354507	-6.19375	5.87505e-10	9.5243e-09	TRUE	0.629462	1.17966	1.24979	-1.05734	-0.893242	-0.309054	-0.79927
Zm00001eb073110	315.148	-2.19439	0.440517	-4.9814	6.31268e-07	6.03406e-06	TRUE	1.84903	0.282722	0.684013	-0.687287	-0.812426	-0.790088	-0.525965
Zm00001eb190920	5403.89	-2.19373	0.299444	-7.32601	2.37109e-13	6.11526e-12	TRUE	1.60225	0.435143	0.807353	-1.17389	-0.9887	-0.382345	-0.299806
Zm00001eb411260	4695.13	-2.19305	0.475638	-4.61075	4.01212e-06	3.25025e-05	TRUE	-0.399601	1.08365	1.77312	-0.690628	-0.642992	-0.577285	-0.546265
Zm00001eb041120	262.136	-2.19176	0.449732	-4.87347	1.09654e-06	9.95167e-06	TRUE	-0.100381	0.914452	1.53496	-1.11224	-1.10539	0.340511	-0.471907
Zm00001eb291340	6940.96	-2.1912	0.241943	-9.05671	1.3445e-19	6.86031e-18	TRUE	0.492833	0.840371	1.14436	-1.31107	-1.39748	-0.030765	0.261761
Zm00001eb398820	352.873	-2.1911	0.458105	-4.78296	1.72736e-06	1.50692e-05	TRUE	0.011243	1.25472	1.55355	-0.637265	-0.67264	-0.671003	-0.838601
Zm00001eb405440	223.049	-2.18934	0.426311	-5.13554	2.81329e-07	2.89598e-06	TRUE	-0.015424	0.470952	1.03665	-1.26218	-1.36511	0.01871	1.1164
Zm00001eb055230	2128.48	-2.18894	0.313788	-6.97587	3.03973e-12	6.76901e-11	TRUE	0.347054	1.01332	1.32051	-1.10414	-1.34055	-0.298225	0.062036
Zm00001eb046510	1214.63	-2.18837	0.352769	-6.2034	5.52567e-10	9.01975e-09	TRUE	-0.053801	0.991893	1.62463	-1.05878	-1.07726	-0.238979	-0.187704
Zm00001eb400530	690.068	-2.18775	0.274127	-7.98077	1.45425e-15	4.79733e-14	TRUE	0.078458	0.43432	0.41648	-1.39221	-1.39692	1.00918	0.85069
Zm00001eb392390	1804.56	-2.18449	0.362591	-6.02468	1.69447e-09	2.59009e-08	TRUE	0.065888	0.316989	1.6486	-1.1448	-1.2395	-0.189748	0.542567
Zm00001eb063340	572.771	-2.18159	0.336275	-6.48751	8.72645e-11	1.60759e-09	TRUE	0.192992	0.701854	1.01525	-1.28162	-1.54243	0.448991	0.46496
Zm00001eb028940	8407.95	-2.18097	0.304494	-7.16261	7.91564e-13	1.89989e-11	TRUE	1.31941	0.195463	0.343327	-1.31105	-1.32362	-0.018462	0.794928
Zm00001eb111250	433.352	-2.18025	0.321011	-6.7918	1.10744e-11	2.33418e-10	TRUE	0.577657	0.412515	1.08072	-1.42243	-1.37207	0.078501	0.645109
Zm00001eb161080	916.391	-2.17675	0.387261	-5.62088	1.89983e-08	2.42566e-07	TRUE	1.48009	-0.259833	0.454181	-1.15708	-1.35742	0.394823	0.445246
Zm00001eb019570	98.4154	-2.17587	0.698483	-3.11514	0.0018386	0.00693262	TRUE	-0.292712	-0.154392	-0.354178	-0.657815	-0.776504	2.17383	0.061768
Zm00001eb328440	402.458	-2.17581	0.375947	-5.78753	7.14291e-09	9.78014e-08	TRUE	0.494352	0.663136	1.73663	-1.04251	-0.828507	-0.470678	-0.552428
Zm00001eb185240	851.606	-2.17523	0.502299	-4.33055	1.4874e-05	0.000105389	TRUE	-0.066315	1.71897	1.05369	-0.895912	-0.52001	-0.533757	-0.756661
Zm00001eb139760	2097.39	-2.17491	0.301804	-7.20637	5.7465e-13	1.40541e-11	TRUE	1.35712	0.396734	0.93686	-1.16274	-1.24176	-0.449892	0.163683
Zm00001eb113310	688.085	-2.17359	0.431235	-5.0404	4.64569e-07	4.55734e-06	TRUE	1.97525	0.289945	0.40509	-0.548158	-0.529332	-0.819223	-0.773575
Zm00001eb418760	1855.83	-2.17356	0.351002	-6.19243	5.92443e-10	9.59339e-09	TRUE	-0.180503	0.176371	0.372069	-1.13357	-1.34304	0.561463	1.54722
Zm00001eb172520	166.096	-2.17155	0.473851	-4.58277	4.58863e-06	3.67739e-05	TRUE	-0.27683	-0.147454	-0.089488	-0.93146	-1.0426	1.89365	0.594183
Zm00001eb088350	614.468	-2.1713	0.344062	-6.31078	2.7763e-10	4.77934e-09	TRUE	0.919729	-0.008004	0.255114	-1.3251	-1.32595	0.255555	1.22866
Zm00001eb066600	632.591	-2.17079	0.376039	-5.77277	7.79787e-09	1.05951e-07	TRUE	1.50613	0.090836	0.22044	-1.33116	-1.19298	0.014397	0.692339
Zm00001eb242360	1376.63	-2.16899	0.607885	-3.5681	0.000359585	0.00171915	TRUE	1.31027	-0.452788	-0.786564	-0.836677	-0.957023	1.2854	0.437373
Zm00001eb189250	955.765	-2.16844	0.433836	-4.9983	5.78387e-07	5.57366e-06	TRUE	1.73574	-0.138094	-0.092954	-1.09617	-1.07944	-0.093278	0.764197
Zm00001eb063170	140.405	-2.16833	0.433404	-5.00303	5.64371e-07	5.44228e-06	TRUE	0.761801	1.25258	1.14234	-0.696717	-0.989244	-0.726025	-0.744735
Zm00001eb196900	146.323	-2.16828	0.495658	-4.37454	1.21688e-05	8.80236e-05	TRUE	0.292293	1.25199	1.20491	-1.26921	-0.931934	0.090464	-0.638507
Zm00001eb177410	1719.86	-2.16745	0.464278	-4.66842	3.0352e-06	2.51927e-05	TRUE	1.06326	0.08945	0.884914	-1.12239	-1.06673	-0.837833	0.989328
Zm00001eb159530	1956.49	-2.16698	0.336659	-6.43671	1.22094e-10	2.20064e-09	TRUE	1.64903	0.308389	0.533547	-1.21598	-1.1026	-0.395809	0.223418
Zm00001eb401210	1274.87	-2.16667	0.364343	-5.94679	2.7345e-09	4.04051e-08	TRUE	-0.233783	0.990596	1.50433	-1.14905	-1.17214	0.080116	-0.020068
Zm00001eb310330	893.814	-2.16507	0.417748	-5.18271	2.18689e-07	2.29956e-06	TRUE	-0.348649	0.779279	1.75368	-1.0138	-1.0678	0.054767	-0.157467
Zm00001eb272360	1421.58	-2.16419	0.36462	-5.93545	2.93044e-09	4.30314e-08	TRUE	1.45863	-0.227347	0.204696	-1.24113	-1.25354	0.298449	0.760247
Zm00001eb345890	2441.29	-2.16248	0.482025	-4.48624	7.24912e-06	5.52843e-05	TRUE	-0.448739	1.21004	1.67413	-0.693394	-0.722259	-0.578061	-0.441718
Zm00001eb330660	483.074	-2.16162	0.338444	-6.38692	1.69263e-10	2.98631e-09	TRUE	1.24765	0.535693	1.29111	-1.01513	-0.826203	-0.526933	-0.706178
Zm00001eb398020	324.567	-2.16049	0.458574	-4.71133	2.46111e-06	2.08423e-05	TRUE	0.979768	0.206257	0.479365	-1.11735	-1.55068	1.05449	-0.051844
Zm00001eb308440	835.442	-2.15886	0.419495	-5.14634	2.65622e-07	2.75025e-06	TRUE	1.66014	-0.097587	-0.023891	-1.14345	-1.12116	-0.087508	0.813454
Zm00001eb365200	37447.8	-2.15886	0.348903	-6.18755	6.11046e-10	9.86085e-09	TRUE	0.906991	0.480172	1.51797	-0.977821	-0.996938	-0.825582	-0.104787
Zm00001eb069300	226.169	-2.15767	0.478788	-4.50653	6.5897e-06	5.0774e-05	TRUE	1.8884	-0.197091	0.298758	-1.01002	-1.10704	-0.097914	0.224908
Zm00001eb041990	468.519	-2.15758	0.282491	-7.63771	2.21116e-14	6.50732e-13	TRUE	0.761721	0.886027	0.645737	-1.43689	-1.4133	0.259536	0.297176
Zm00001eb029550	1260.07	-2.15756	0.424461	-5.08306	3.71399e-07	3.73014e-06	TRUE	-0.312418	1.03622	1.66807	-0.961113	-0.943222	-0.482431	-0.005113
Zm00001eb413100	291.687	-2.15706	0.409479	-5.26782	1.38056e-07	1.51133e-06	TRUE	1.39847	0.05879	0.415674	-1.19486	-1.40268	0.038024	0.686586
Zm00001eb175250	629.638	-2.15579	0.365671	-5.89542	3.73731e-09	5.35492e-08	TRUE	1.43278	0.008099	0.456995	-1.1989	-1.42274	0.44777	0.275996
Zm00001eb202110	143.224	-2.15447	0.480077	-4.48775	7.19782e-06	5.49817e-05	TRUE	0.308761	0.594618	1.63227	-1.00232	-1.31241	-0.370599	0.149669
Zm00001eb308950	292.409	-2.15347	0.347678	-6.19386	5.87071e-10	9.5243e-09	TRUE	1.01922	0.647996	0.905048	-1.24496	-1.43231	-0.187549	0.292545
Zm00001eb056180	729.001	-2.15313	0.304768	-7.06484	1.60806e-12	3.67908e-11	TRUE	1.24896	0.480608	1.34533	-0.863701	-0.845517	-0.629215	-0.736472
Zm00001eb207780	5056.61	-2.15282	0.326127	-6.60118	4.07892e-11	7.87205e-10	TRUE	0.934136	0.703973	1.02133	-1.16688	-1.27115	-0.65235	0.430937
Zm00001eb034890	912.618	-2.15278	0.493767	-4.3599	1.30121e-05	9.34321e-05	TRUE	1.90654	-0.319373	-0.188777	-0.944684	-0.946016	-0.153169	0.645483
Zm00001eb135450	380.742	-2.15272	0.551712	-3.9019	9.5442e-05	0.000538308	TRUE	-0.541219	0.714635	1.2827	-1.14884	-0.914429	1.08163	-0.474474
Zm00001eb303940	149697	-2.14986	0.389955	-5.5131	3.52563e-08	4.30388e-07	TRUE	0.096098	0.823528	1.65226	-1.00561	-1.00059	-0.735709	0.170027
Zm00001eb283870	4821.11	-2.14986	0.308235	-6.97473	3.06453e-12	6.81353e-11	TRUE	0.225623	1.07503	1.50534	-1.06208	-1.042	-0.534317	-0.167609
Zm00001eb342490	216.142	-2.14477	0.39001	-5.49927	3.81377e-08	4.6159e-07	TRUE	0.560857	1.16673	0.304259	-1.31716	-1.42562	0.680733	0.030204
Zm00001eb305960	1779.64	-2.14415	0.257088	-8.34015	7.41943e-17	2.82157e-15	TRUE	0.614444	0.962894	0.786586	-1.31993	-1.47631	0.391406	0.04091
Zm00001eb310290	3848.56	-2.14316	0.347922	-6.15989	7.27947e-10	1.16414e-08	TRUE	1.50628	0.254982	0.478263	-1.12542	-1.33854	-0.308454	0.532884
Zm00001eb271150	1008.08	-2.14166	0.293216	-7.30404	2.79248e-13	7.13717e-12	TRUE	1.31791	0.607615	1.11496	-1.12454	-0.949907	-0.575927	-0.390104
Zm00001eb369780	1965.93	-2.13913	0.325689	-6.56801	5.0991e-11	9.72188e-10	TRUE	1.01448	0.012776	0.068379	-1.30137	-1.2909	0.25534	1.24129
Zm00001eb434430	2202.71	-2.13711	0.369963	-5.77655	7.62492e-09	1.038e-07	TRUE	1.62206	0.002889	1.16782	-0.74411	-0.859924	-0.646425	-0.542302
Zm00001eb035820	1058.53	-2.13659	0.37256	-5.73489	9.75747e-09	1.29719e-07	TRUE	1.19427	0.080654	0.376253	-1.18817	-1.35509	-0.178344	1.07043
Zm00001eb017780	586.802	-2.13159	0.3196	-6.66956	2.56572e-11	5.15505e-10	TRUE	0.323965	0.422308	1.17684	-1.44901	-1.32214	0.174519	0.673517
Zm00001eb108230	2483.72	-2.12897	0.399341	-5.3312	9.75646e-08	1.10716e-06	TRUE	1.98331	0.236827	0.454257	-0.605216	-0.692208	-0.76121	-0.615761
Zm00001eb371680	448.745	-2.12863	0.387849	-5.48828	4.05859e-08	4.88304e-07	TRUE	-0.363489	-0.439188	-0.202619	-0.858962	-0.823697	0.793935	1.89402
Zm00001eb178580	776.634	-2.12836	0.273535	-7.78095	7.19808e-15	2.24406e-13	TRUE	0.097572	0.228491	0.514223	-1.36571	-1.38487	1.13712	0.773172
Zm00001eb227240	676.468	-2.12725	0.298016	-7.13804	9.46705e-13	2.25698e-11	TRUE	0.627458	0.522645	0.394956	-1.33946	-1.56376	0.766623	0.591544
Zm00001eb098370	484.315	-2.12643	0.39821	-5.33998	9.2956e-08	1.0574e-06	TRUE	0.232129	0.852412	1.71195	-1.00939	-0.857221	-0.238328	-0.691553
Zm00001eb270660	2319.88	-2.12527	0.307581	-6.90963	4.85916e-12	1.06042e-10	TRUE	1.53873	0.432692	0.944561	-1.00618	-1.02987	-0.655265	-0.224671
Zm00001eb044810	1370.18	-2.12493	0.576689	-3.68471	0.000228962	0.0011616	TRUE	-0.435217	0.71659	1.99294	-0.604667	-0.476249	-0.494876	-0.698522
Zm00001eb274110	19425.6	-2.12336	0.317732	-6.68287	2.3431e-11	4.72787e-10	TRUE	0.390877	0.888994	1.39005	-1.0963	-1.25652	-0.541745	0.224644
Zm00001eb163020	7067.48	-2.12284	0.372502	-5.69886	1.20612e-08	1.58709e-07	TRUE	-0.073375	1.05736	1.72607	-0.821417	-0.771181	-0.600473	-0.516985
Zm00001eb050240	34132.6	-2.12249	0.451128	-4.70486	2.54042e-06	2.14627e-05	TRUE	-0.246244	0.798998	1.935	-0.655695	-0.600214	-0.678485	-0.55336
Zm00001eb074880	1652.17	-2.12103	0.250909	-8.45338	2.82995e-17	1.14042e-15	TRUE	0.749682	0.749464	1.40985	-1.16707	-1.1658	-0.315549	-0.260582
Zm00001eb261740	1912.57	-2.1195	0.360922	-5.87245	4.29412e-09	6.08512e-08	TRUE	1.61866	0.008716	0.082309	-1.15529	-1.32022	0.350002	0.415819
Zm00001eb260160	179.739	-2.11817	0.594534	-3.56275	0.000366994	0.00175044	TRUE	0.013162	1.80073	0.910108	-0.496937	-0.700641	-0.649054	-0.87737
Zm00001eb000970	3010.11	-2.11751	0.320264	-6.61177	3.79757e-11	7.37925e-10	TRUE	0.926986	0.36291	0.874032	-1.22239	-1.55452	0.035891	0.577084
Zm00001eb093290	1389.57	-2.11747	0.299017	-7.08144	1.42663e-12	3.30127e-11	TRUE	0.789778	0.855054	1.15805	-1.1149	-1.39823	-0.3238	0.034047
Zm00001eb221890	1569.34	-2.11589	0.293288	-7.21437	5.41832e-13	1.32974e-11	TRUE	1.53344	0.385721	0.526528	-1.26938	-1.25085	-0.110771	0.18531
Zm00001eb396750	123.22	-2.11515	0.527506	-4.00971	6.07937e-05	0.000362793	TRUE	1.82241	0.593751	0.310421	-0.75858	-1.04863	-0.202537	-0.716835
Zm00001eb434240	567.079	-2.11289	0.375128	-5.63246	1.77661e-08	2.27654e-07	TRUE	1.26539	-0.135954	0.247061	-1.22538	-1.37881	0.328378	0.899319
Zm00001eb434030	1499.05	-2.11272	0.292618	-7.22007	5.19591e-13	1.27958e-11	TRUE	1.05751	0.474114	1.34465	-1.11838	-1.13781	-0.545782	-0.074306
Zm00001eb153070	124.442	-2.11202	0.586714	-3.59975	0.000318521	0.00154628	TRUE	2.13511	0.045604	-0.18986	-0.718514	-0.88136	-0.065708	-0.325272
Zm00001eb091200	1183.5	-2.11187	0.356898	-5.91729	3.27289e-09	4.74703e-08	TRUE	0.462802	0.827458	1.68711	-0.812926	-0.705609	-0.602985	-0.855847
Zm00001eb211410	1040	-2.11187	0.39379	-5.36293	8.18819e-08	9.3972e-07	TRUE	-0.043789	1.15421	1.55299	-1.01911	-0.897105	-0.117109	-0.630084
Zm00001eb396690	301.303	-2.10927	0.507366	-4.15729	3.22043e-05	0.000209262	TRUE	-0.519637	1.01959	1.55274	-0.913279	-1.14915	-0.244865	0.254602
Zm00001eb140590	1104.45	-2.10866	0.337051	-6.25621	3.94435e-10	6.64669e-09	TRUE	1.7228	0.180852	0.78499	-1.11091	-0.986937	-0.281651	-0.309144
Zm00001eb323700	2278.88	-2.10785	0.319643	-6.59439	4.27007e-11	8.21859e-10	TRUE	0.998228	-0.084194	0.365312	-1.26266	-1.44625	0.436194	0.99337
Zm00001eb002000	1456.82	-2.10678	0.37133	-5.67361	1.39815e-08	1.81952e-07	TRUE	-0.073179	0.728258	1.84624	-0.993918	-0.957216	-0.285085	-0.265098
Zm00001eb258610	243.638	-2.1012	0.572547	-3.66991	0.000242636	0.00122309	TRUE	-0.471705	1.84138	0.961947	-0.703398	-0.671717	-0.307864	-0.64864
Zm00001eb413150	613.956	-2.10111	0.553578	-3.79551	0.000147341	0.000788692	TRUE	-0.631362	1.73127	1.11594	-0.718918	-0.727901	-0.293988	-0.475038
Zm00001eb143180	1247.19	-2.10015	0.336838	-6.2349	4.52068e-10	7.51768e-09	TRUE	-0.002546	0.92173	1.56444	-1.11278	-1.19676	0.005925	-0.180008
Zm00001eb306680	10046.1	-2.09945	0.336441	-6.24016	4.37123e-10	7.28623e-09	TRUE	0.201482	0.856562	1.78464	-0.824883	-0.718537	-0.651751	-0.647511
Zm00001eb092590	1696.09	-2.09693	0.366594	-5.72002	1.06513e-08	1.4094e-07	TRUE	1.6192	-0.192168	0.254922	-1.22108	-1.19538	0.159233	0.575273
Zm00001eb376700	320.989	-2.09666	0.322616	-6.49892	8.08982e-11	1.49809e-09	TRUE	0.841684	0.890835	0.890845	-1.25634	-1.45238	-0.037791	0.123142
Zm00001eb345230	1383.28	-2.09619	0.364496	-5.75093	8.87536e-09	1.18771e-07	TRUE	0.009686	0.902212	1.7171	-0.94039	-1.04179	-0.494643	-0.15217
Zm00001eb386650	556.907	-2.09489	0.317284	-6.60258	4.04076e-11	7.81966e-10	TRUE	1.1021	0.497922	0.924989	-1.27547	-1.34081	-0.310092	0.401364
Zm00001eb146740	1587.29	-2.09457	0.308731	-6.78445	1.16532e-11	2.44889e-10	TRUE	1.40962	0.291943	0.534111	-1.2481	-1.34938	-0.134089	0.4959
Zm00001eb048770	523.59	-2.09361	0.388842	-5.38421	7.27639e-08	8.41889e-07	TRUE	1.33483	1.07504	0.011915	-1.09363	-1.24587	0.353045	-0.435333
Zm00001eb371770	2698.3	-2.09211	0.325943	-6.41866	1.3748e-10	2.46231e-09	TRUE	0.240557	0.602866	1.62853	-1.08454	-1.32001	-0.086865	0.019456
Zm00001eb150290	1083.65	-2.09176	0.352393	-5.93589	2.92248e-09	4.29589e-08	TRUE	0.123206	0.973271	1.71636	-0.820361	-0.916	-0.548607	-0.527871
Zm00001eb283430	590.641	-2.09168	0.293879	-7.11748	1.09918e-12	2.59002e-11	TRUE	0.243068	-0.043333	0.31141	-1.284	-1.35654	0.857301	1.2721
Zm00001eb282610	2852.28	-2.09164	0.610076	-3.42849	0.000606958	0.00272373	TRUE	-0.514942	0.594384	2.01888	-0.789918	-0.476465	-0.182927	-0.649012
Zm00001eb296560	21307.7	-2.09143	0.490417	-4.26459	2.00273e-05	0.000137773	TRUE	-0.443261	1.03484	1.79202	-0.716431	-0.679094	-0.66533	-0.32275
Zm00001eb213150	395.163	-2.09123	0.31454	-6.64852	2.96064e-11	5.86547e-10	TRUE	0.317331	0.748986	1.09995	-1.41598	-1.38482	0.36426	0.27027
Zm00001eb364370	288.922	-2.09029	0.386205	-5.41237	6.21972e-08	7.27877e-07	TRUE	0.27221	1.14048	1.5061	-1.03005	-0.872656	-0.412849	-0.603234
Zm00001eb253620	825.003	-2.08996	0.382742	-5.4605	4.74803e-08	5.65024e-07	TRUE	1.61677	-0.139751	0.348998	-1.13856	-1.28795	0.066501	0.533993
Zm00001eb094960	1632.46	-2.0885	0.2872	-7.27192	3.5441e-13	8.92949e-12	TRUE	0.754148	0.27393	0.037417	-1.3047	-1.47643	0.880331	0.835309
Zm00001eb059910	1744.44	-2.08429	0.355117	-5.8693	4.37642e-09	6.17707e-08	TRUE	1.80951	-0.023495	0.374997	-1.12616	-1.14267	0.005068	0.102753
Zm00001eb150960	4269.92	-2.08184	0.322715	-6.45103	1.1109e-10	2.02028e-09	TRUE	0.196022	0.963988	1.66402	-1.01818	-0.890635	-0.543081	-0.372126
Zm00001eb076780	2860.77	-2.07866	0.392891	-5.29067	1.21872e-07	1.35588e-06	TRUE	-0.107992	0.987295	1.79129	-0.715459	-0.755286	-0.563085	-0.636762
Zm00001eb327270	557.301	-2.07816	0.298912	-6.95241	3.591e-12	7.9404e-11	TRUE	1.47926	0.735343	0.820826	-1.04275	-1.00093	-0.586214	-0.405539
Zm00001eb169640	1303.18	-2.07734	0.307616	-6.75302	1.44803e-11	3.00737e-10	TRUE	0.24118	-0.070516	-0.2469	-1.11621	-1.18172	0.731467	1.6427
Zm00001eb006900	780.67	-2.07712	0.382949	-5.42401	5.82758e-08	6.8374e-07	TRUE	1.89646	0.501331	0.40083	-0.762899	-0.720544	-0.770277	-0.544902
Zm00001eb084080	512.333	-2.07676	0.297073	-6.99074	2.73447e-12	6.12772e-11	TRUE	0.795817	0.793871	0.947418	-1.29697	-1.41882	-0.163338	0.342022
Zm00001eb251250	88.3659	-2.07579	0.607192	-3.41867	0.000629286	0.00281059	TRUE	0.896418	1.11086	0.779883	-0.908461	-1.17295	0.319454	-1.02521
Zm00001eb147760	878.166	-2.07534	0.387192	-5.35999	8.32281e-08	9.54398e-07	TRUE	1.74989	0.340198	0.628418	-0.898199	-1.05814	-0.705406	-0.056754
Zm00001eb041520	149.169	-2.07424	0.398255	-5.20833	1.90544e-07	2.02614e-06	TRUE	1.35998	0.786532	1.01176	-0.789296	-0.862138	-0.810964	-0.695872
Zm00001eb234910	909.956	-2.07254	0.49289	-4.20488	2.61218e-05	0.000174617	TRUE	0.395242	0.711812	1.76754	-0.788359	-0.656829	-0.451642	-0.977759
Zm00001eb312530	1004.31	-2.07018	0.307803	-6.72566	1.74797e-11	3.59347e-10	TRUE	0.706373	0.933534	1.45416	-0.819539	-1.00156	-0.758886	-0.514087
Zm00001eb414550	13123	-2.06966	0.29837	-6.93656	4.01752e-12	8.82176e-11	TRUE	0.925082	0.64768	1.42908	-1.06362	-0.969364	-0.75103	-0.217835
Zm00001eb131590	1538.95	-2.06603	0.367874	-5.61615	1.95255e-08	2.48626e-07	TRUE	1.8537	0.156235	0.767304	-0.748493	-0.739094	-0.5656	-0.724046
Zm00001eb411380	920.138	-2.06577	0.569251	-3.62893	0.000284601	0.00140566	TRUE	-0.730202	1.99429	0.271606	-0.91105	-0.753449	0.134646	-0.005836
Zm00001eb316900	211.09	-2.06537	0.518439	-3.98383	6.78146e-05	0.000399315	TRUE	0.183697	0.742764	1.79969	-0.748218	-0.886754	-0.887774	-0.203404
Zm00001eb130840	1692.73	-2.06357	0.507752	-4.06413	4.82127e-05	0.000295076	TRUE	0.067158	0.832832	1.8329	-0.516233	-0.664532	-0.654188	-0.897938
Zm00001eb411880	613.993	-2.05809	0.30453	-6.75825	1.39664e-11	2.9049e-10	TRUE	0.897114	0.278085	0.297519	-1.33723	-1.51368	0.67841	0.699781
Zm00001eb307650	1200.18	-2.0561	0.429817	-4.78367	1.72122e-06	1.5025e-05	TRUE	1.69802	-0.003394	0.333121	-0.957465	-1.27171	0.575836	-0.374407
Zm00001eb194020	300.33	-2.05609	0.562341	-3.6563	0.000255885	0.00128349	TRUE	-0.008643	0.093736	0.107876	-0.824111	-0.916754	2.05104	-0.50314
Zm00001eb342550	1532.37	-2.05528	0.390634	-5.26139	1.42973e-07	1.56005e-06	TRUE	-0.034147	0.839713	1.80423	-0.897464	-0.891134	-0.636129	-0.185068
Zm00001eb320800	43133.5	-2.05464	0.324922	-6.32349	2.55723e-10	4.4237e-09	TRUE	0.342031	0.746831	1.56343	-1.11492	-1.1126	-0.605952	0.181176
Zm00001eb303770	804.344	-2.05266	0.386794	-5.30685	1.11534e-07	1.25464e-06	TRUE	0.00722	0.303747	1.27482	-1.14986	-1.50095	0.267588	0.79743
Zm00001eb040550	715.533	-2.05261	0.633853	-3.23831	0.00120241	0.00486348	TRUE	-0.355741	0.727151	1.96368	-0.808464	-0.353487	-0.4818	-0.691341
Zm00001eb019460	88.9234	-2.05041	0.584743	-3.50652	0.000454002	0.00211079	TRUE	-0.127898	0.964087	1.80315	-0.807945	-0.617443	-0.480519	-0.733431
Zm00001eb396400	251.659	-2.05009	0.403326	-5.08298	3.71568e-07	3.73014e-06	TRUE	0.754227	0.704326	1.46392	-1.14486	-0.972212	-0.077304	-0.728098
Zm00001eb256400	528.435	-2.04926	0.349048	-5.871	4.33174e-09	6.13231e-08	TRUE	1.10443	0.680723	0.897971	-1.1242	-1.38023	-0.49287	0.314176
Zm00001eb333240	1288.19	-2.04902	0.471985	-4.34127	1.41659e-05	0.000100926	TRUE	-0.362435	1.0305	1.76543	-0.959859	-0.661916	-0.428694	-0.383031
Zm00001eb179140	333.535	-2.04898	0.373961	-5.47913	4.27413e-08	5.10771e-07	TRUE	1.42928	0.625753	1.04994	-0.668435	-0.940359	-0.828366	-0.667805
Zm00001eb362300	194.028	-2.04447	0.540904	-3.77972	0.000157005	0.000833188	TRUE	-0.317002	1.76258	1.02351	-0.876303	-0.692479	-0.665286	-0.235012
Zm00001eb386290	1224.48	-2.04159	0.31756	-6.42899	1.28456e-10	2.30652e-09	TRUE	0.09632	1.16592	1.11356	-1.35146	-1.20037	-0.144921	0.320942
Zm00001eb058280	415.785	-2.03909	0.296976	-6.86618	6.59441e-12	1.4173e-10	TRUE	0.518239	0.46428	0.255527	-1.46343	-1.40326	0.732044	0.896607
Zm00001eb426370	5598.03	-2.03835	0.321541	-6.3393	2.3081e-10	4.00738e-09	TRUE	1.04429	0.385191	1.57027	-0.582137	-0.743935	-0.871622	-0.802058
Zm00001eb376040	7850.58	-2.03815	0.489286	-4.16556	3.10596e-05	0.000203194	TRUE	-0.477834	1.50437	1.28571	-1.01408	-0.706189	-0.019206	-0.572773
Zm00001eb085220	777.307	-2.03678	0.339212	-6.00446	1.91975e-09	2.90626e-08	TRUE	0.431607	0.75306	1.75155	-0.767289	-0.808159	-0.606214	-0.754552
Zm00001eb250630	191.312	-2.0362	0.424508	-4.79662	1.61368e-06	1.41734e-05	TRUE	0.66589	0.305016	1.01181	-1.20197	-1.59414	0.158754	0.65464
Zm00001eb057810	12021.1	-2.03424	0.285183	-7.1331	9.81342e-13	2.33563e-11	TRUE	0.284136	0.762596	1.65625	-1.10455	-1.12273	-0.258599	-0.217105
Zm00001eb189860	5234.41	-2.03026	0.337819	-6.00991	1.85628e-09	2.8192e-08	TRUE	-0.087702	0.760224	1.15866	-1.25871	-1.27327	-0.20672	0.907519
Zm00001eb294250	6336.11	-2.02869	0.277991	-7.29766	2.92808e-13	7.45687e-12	TRUE	1.37195	0.652879	1.07702	-0.887963	-0.929726	-0.806622	-0.477532
Zm00001eb194350	178.91	-2.02841	0.401802	-5.04828	4.45807e-07	4.38238e-06	TRUE	1.69179	0.533772	0.716437	-0.926688	-0.962696	-0.534348	-0.518265
Zm00001eb358730	9349.3	-2.02739	0.408109	-4.96776	6.77315e-07	6.43087e-06	TRUE	2.0733	0.077168	0.352174	-0.626471	-0.64944	-0.662199	-0.564534
Zm00001eb257600	460.716	-2.02671	0.475071	-4.26611	1.98907e-05	0.000136966	TRUE	1.40737	-0.363834	-0.25343	-1.07085	-1.07285	0.125031	1.22856
Zm00001eb017280	929.743	-2.0253	0.342424	-5.91459	3.32701e-09	4.81077e-08	TRUE	0.746804	1.57997	0.740585	-0.651148	-0.877176	-0.868966	-0.670066
Zm00001eb220780	1135.74	-2.02367	0.448312	-4.51397	6.36249e-06	4.92642e-05	TRUE	2.11104	0.049104	-0.07136	-0.774825	-0.91303	-0.304521	-0.096408
Zm00001eb252010	2782.6	-2.01981	0.380416	-5.30947	1.09944e-07	1.23873e-06	TRUE	0.098258	0.827444	1.83849	-0.631805	-0.691233	-0.791937	-0.649219
Zm00001eb304520	344.659	-2.01852	0.610772	-3.30488	0.000950185	0.00396288	TRUE	2.1728	-0.097285	0.115784	-0.397807	-0.593978	-0.486637	-0.712877
Zm00001eb355680	6435.76	-2.01805	0.427038	-4.7257	2.29322e-06	1.95421e-05	TRUE	1.35448	-0.483802	-0.244083	-1.08874	-1.08598	0.381205	1.16692
Zm00001eb157800	3582.7	-2.0141	0.351632	-5.72787	1.01701e-08	1.34699e-07	TRUE	0.998072	0.238196	1.39767	-1.03262	-1.20354	-0.645944	0.248168
Zm00001eb121270	4366.26	-2.01371	0.579662	-3.47394	0.000512867	0.00235057	TRUE	1.88902	-0.591838	-0.497223	-0.749379	-0.916601	0.602403	0.26362
Zm00001eb014160	2356.78	-2.01322	0.425783	-4.72828	2.26429e-06	1.93255e-05	TRUE	-0.197752	0.95293	1.82899	-0.693293	-0.718397	-0.694704	-0.477771
Zm00001eb027100	423.46	-2.01303	0.355248	-5.66654	1.45706e-08	1.89444e-07	TRUE	0.423928	0.714306	1.51944	-1.24081	-1.11294	-0.449382	0.14546
Zm00001eb398470	962.306	-2.01285	0.363839	-5.53224	3.16158e-08	3.89297e-07	TRUE	1.74225	0.154188	0.354395	-1.06191	-1.2728	0.220833	-0.136963
Zm00001eb289960	308.839	-2.0123	0.492852	-4.08298	4.44622e-05	0.000275775	TRUE	-0.17308	1.14407	1.68962	-0.69431	-0.510544	-0.772704	-0.683046
Zm00001eb097670	1187.75	-2.01217	0.358916	-5.60622	2.06788e-08	2.62135e-07	TRUE	0.000866	0.78626	1.50764	-1.15385	-1.19555	-0.388981	0.443617
Zm00001eb419710	574.665	-2.01175	0.353466	-5.69149	1.25936e-08	1.64949e-07	TRUE	1.48353	0.383306	1.15383	-0.591187	-0.776697	-0.860305	-0.792474
Zm00001eb304600	1472.6	-2.00923	0.421479	-4.76709	1.86902e-06	1.62054e-05	TRUE	-0.311349	0.950323	1.73363	-1.04229	-0.854067	-0.418772	-0.057483
Zm00001eb051810	100.823	-2.00834	0.654055	-3.0706	0.00213629	0.00788738	TRUE	0.223782	0.278001	2.04527	-0.629035	-0.535568	-0.530861	-0.851585
Zm00001eb184570	557.352	-2.00829	0.417022	-4.8158	1.46609e-06	1.29816e-05	TRUE	-0.053236	0.881679	1.82926	-0.880835	-0.731566	-0.612745	-0.432555
Zm00001eb233690	981.888	-2.00775	0.321741	-6.24025	4.36872e-10	7.28623e-09	TRUE	1.37758	0.343421	1.25232	-0.85152	-1.05636	-0.59375	-0.471702
Zm00001eb223840	539.402	-2.00756	0.311071	-6.45372	1.09138e-10	1.98988e-09	TRUE	0.344707	0.863871	1.14158	-1.38952	-1.30442	-0.092988	0.436779
Zm00001eb416150	670.313	-2.00682	0.300662	-6.67467	2.47796e-11	4.98579e-10	TRUE	0.945161	1.23334	0.480963	-1.30327	-1.23053	0.195605	-0.321268
Zm00001eb072650	166.077	-2.00662	0.559894	-3.58393	0.000338458	0.00162968	TRUE	1.40592	0.84798	0.866404	-0.757197	-0.677804	-0.618169	-1.06713
Zm00001eb419100	334.983	-2.00303	0.349286	-5.73465	9.77163e-09	1.29785e-07	TRUE	0.474292	0.664812	1.59886	-1.21185	-1.0972	-0.292838	-0.136065
Zm00001eb057570	1520.86	-2.00135	0.532853	-3.75592	0.000172708	0.000904675	TRUE	-0.640181	1.08395	1.73155	-0.763119	-0.72104	-0.540298	-0.15087
Zm00001eb143020	3214.26	-2.00127	0.314961	-6.35403	2.09746e-10	3.65509e-09	TRUE	1.70722	0.31539	0.409519	-1.11081	-1.23909	-0.192142	0.109915
Zm00001eb406100	3190.43	-1.99978	0.447754	-4.46625	7.96017e-06	6.01251e-05	TRUE	-0.183835	1.13092	1.63054	-0.842715	-0.799313	-0.120074	-0.815521
Zm00001eb285390	2812.51	-1.99848	0.329691	-6.06168	1.34708e-09	2.08606e-08	TRUE	1.34471	0.205301	0.809005	-1.16412	-1.3023	-0.414375	0.521777
Zm00001eb394530	359.904	-1.99844	0.316381	-6.31659	2.67404e-10	4.61451e-09	TRUE	0.885224	1.02588	1.17609	-1.14607	-0.991111	-0.604804	-0.345215
Zm00001eb056340	371.176	-1.99739	0.501999	-3.97886	6.92456e-05	0.000406728	TRUE	-0.206891	1.00893	1.79258	-0.620976	-0.503657	-0.679201	-0.790779
Zm00001eb426320	505.248	-1.99585	0.457662	-4.36097	1.29488e-05	9.30488e-05	TRUE	1.82909	-0.01459	0.105372	-0.920259	-1.19671	-0.316597	0.513697
Zm00001eb243590	577.632	-1.99457	0.302652	-6.5903	4.38949e-11	8.42557e-10	TRUE	1.279	0.570137	1.26684	-0.846768	-0.739603	-0.777525	-0.752086
Zm00001eb248020	1376.4	-1.99339	0.484102	-4.11771	3.82656e-05	0.00024308	TRUE	-0.481364	1.02878	1.63784	-0.825915	-0.963044	-0.610017	0.21372
Zm00001eb319030	5172.4	-1.99322	0.538994	-3.69804	0.00021727	0.00110863	TRUE	0.218054	1.84543	0.679976	-0.381729	-0.994191	-0.771046	-0.596498
Zm00001eb257180	445.892	-1.99303	0.345276	-5.77228	7.82076e-09	1.06059e-07	TRUE	0.913398	0.701031	1.47268	-0.54702	-0.65866	-0.905199	-0.97623
Zm00001eb145940	384.952	-1.99268	0.535553	-3.7208	0.000198596	0.00102254	TRUE	-0.547282	-0.38714	0.118833	-0.73544	-0.823695	0.322064	2.05266
Zm00001eb094670	951.493	-1.99041	0.391012	-5.0904	3.57306e-07	3.60227e-06	TRUE	-0.200196	0.088221	0.247233	-1.01026	-1.20715	0.251932	1.83022
Zm00001eb250700	386.492	-1.98904	0.545623	-3.64544	0.000266937	0.00132953	TRUE	-0.071699	0.752154	1.90059	-0.760364	-0.580873	-0.362279	-0.877531
Zm00001eb269770	4544.88	-1.98819	0.318518	-6.242	4.32e-10	7.21782e-09	TRUE	0.269367	0.960734	1.61611	-0.895784	-1.08639	-0.567438	-0.296591
Zm00001eb063110	164.362	-1.98393	0.573134	-3.46155	0.00053708	0.00245046	TRUE	-0.373704	1.15542	1.57542	-0.747769	-0.967093	0.092837	-0.735103
Zm00001eb127850	1417.13	-1.98345	0.356914	-5.55722	2.7411e-08	3.42276e-07	TRUE	1.65721	0.601975	0.753656	-0.655026	-0.821102	-0.628222	-0.908491
Zm00001eb072850	11476.8	-1.97993	0.34265	-5.77827	7.5472e-09	1.02939e-07	TRUE	-0.131814	1.2093	1.5249	-1.01572	-0.988975	-0.241714	-0.355976
Zm00001eb369090	137.979	-1.97766	0.461933	-4.28126	1.85835e-05	0.000128903	TRUE	0.421496	0.316613	0.576627	-1.20132	-1.65278	0.647431	0.891941
Zm00001eb141210	2760.14	-1.97725	0.470886	-4.19901	2.68085e-05	0.000178619	TRUE	-0.450041	-0.2415	-0.265911	-0.664502	-0.637087	2.19473	0.064307
Zm00001eb215540	483.311	-1.97287	0.425289	-4.63888	3.50304e-06	2.87395e-05	TRUE	1.8509	0.045761	-0.105465	-1.06484	-1.12079	-0.018545	0.412985
Zm00001eb053650	2023.98	-1.97277	0.251248	-7.85189	4.09824e-15	1.29762e-13	TRUE	0.945337	0.735804	1.45227	-0.759561	-0.773334	-0.794948	-0.805563
Zm00001eb351960	344.364	-1.97202	0.345802	-5.70273	1.17902e-08	1.5572e-07	TRUE	0.631705	0.954474	1.47595	-0.942122	-0.925118	-0.762018	-0.432875
Zm00001eb294590	669.354	-1.97174	0.35766	-5.51288	3.53005e-08	4.30557e-07	TRUE	0.869246	0.522794	1.42549	-1.00587	-1.20129	-0.69114	0.080772
Zm00001eb268080	1414.45	-1.97135	0.33854	-5.82311	5.77634e-09	8.00169e-08	TRUE	0.218535	1.66274	1.02934	-0.655831	-0.705359	-0.776651	-0.772772
Zm00001eb226030	252.48	-1.96953	0.534031	-3.68805	0.000225981	0.00114812	TRUE	-0.496213	0.954165	1.7202	-0.807207	-0.961024	0.130499	-0.540425
Zm00001eb211400	725.508	-1.96878	0.391505	-5.02875	4.93688e-07	4.80973e-06	TRUE	1.74704	0.005559	1.01018	-0.776482	-0.704035	-0.698837	-0.583426
Zm00001eb395530	144.613	-1.96788	0.564605	-3.48541	0.000491387	0.00226236	TRUE	-0.071871	-0.350804	-0.048316	-0.7942	-0.819105	2.13659	-0.052293
Zm00001eb170930	2101.95	-1.96493	0.267947	-7.33328	2.2459e-13	5.81351e-12	TRUE	0.907968	0.597054	1.15206	-1.18916	-1.43808	-0.082931	0.053097
Zm00001eb376530	288.498	-1.9648	0.631869	-3.1095	0.00187405	0.00705319	TRUE	0.662127	-0.127302	-0.024309	-0.865631	-0.800918	1.89821	-0.742172
Zm00001eb075050	884.375	-1.96399	0.348644	-5.63322	1.76877e-08	2.27265e-07	TRUE	1.56251	0.098552	0.434891	-1.14363	-1.39584	0.171239	0.272274
Zm00001eb347620	476.057	-1.96377	0.472872	-4.15286	3.28349e-05	0.000212975	TRUE	0.979088	0.469189	1.32462	-0.804463	-1.24475	-0.913302	0.189614
Zm00001eb141310	181.296	-1.96371	0.381343	-5.14946	2.61243e-07	2.70689e-06	TRUE	0.737465	0.905361	1.22884	-1.09471	-1.35545	-0.241805	-0.179697
Zm00001eb179870	386.922	-1.96345	0.342621	-5.73067	1.00037e-08	1.32744e-07	TRUE	0.151474	0.723372	1.24487	-1.29865	-1.39307	0.524096	0.047908
Zm00001eb353240	49.5051	-1.96092	0.614105	-3.19314	0.00140735	0.00553292	TRUE	1.9415	0.576704	0.20132	-0.601677	-0.698738	-0.698171	-0.720941
Zm00001eb206910	2772.01	-1.95954	0.28439	-6.8903	5.56742e-12	1.20701e-10	TRUE	1.15033	0.511682	1.41978	-0.805933	-0.812689	-0.828415	-0.634748
Zm00001eb394640	6500.63	-1.95855	0.306298	-6.39426	1.61325e-10	2.8605e-09	TRUE	1.66587	0.585871	0.764643	-0.674443	-0.784539	-0.861878	-0.695522
Zm00001eb056240	2972.94	-1.95819	0.329863	-5.93637	2.91406e-09	4.28797e-08	TRUE	1.52275	0.103414	0.34542	-1.20596	-1.29169	-0.117782	0.64385
Zm00001eb217390	530.272	-1.95731	0.503907	-3.88426	0.000102643	0.000574129	TRUE	-0.282205	0.452811	0.202559	-0.902969	-0.991163	1.92664	-0.405678
Zm00001eb169490	374.615	-1.95683	0.388505	-5.03682	4.73321e-07	4.63358e-06	TRUE	0.020325	0.301562	0.370101	-1.15533	-1.3132	1.64138	0.135155
Zm00001eb102930	1665.09	-1.95634	0.485485	-4.02966	5.58587e-05	0.00033746	TRUE	1.31514	-0.487977	-0.413194	-0.943241	-1.04472	0.220568	1.35343
Zm00001eb116340	3167.34	-1.95624	0.272104	-7.18931	6.51184e-13	1.58712e-11	TRUE	0.437721	0.869449	1.5816	-1.03798	-1.08662	-0.403091	-0.361068
Zm00001eb029200	39561.4	-1.95572	0.262898	-7.43909	1.01385e-13	2.75507e-12	TRUE	1.29709	0.451621	1.02664	-1.17526	-1.21688	-0.440786	0.057576
Zm00001eb285110	832.437	-1.9551	0.605638	-3.22817	0.00124585	0.00500919	TRUE	-0.564315	1.08576	1.77195	-0.621194	-0.468989	-0.472841	-0.730375
Zm00001eb227540	253.387	-1.95507	0.419725	-4.65798	3.19326e-06	2.63965e-05	TRUE	1.29777	0.747123	1.08113	-0.616124	-1.10461	-0.674464	-0.730817
Zm00001eb405460	470.203	-1.95496	0.380148	-5.14263	2.70914e-07	2.79485e-06	TRUE	0.511212	0.764931	0.462879	-1.18946	-1.68052	0.391156	0.739806
Zm00001eb013460	232.329	-1.95493	0.415091	-4.70964	2.4815e-06	2.10025e-05	TRUE	0.035342	0.716692	1.40447	-1.13223	-1.44905	0.355001	0.069772
Zm00001eb366320	416.465	-1.94969	0.32101	-6.0736	1.25072e-09	1.95175e-08	TRUE	1.43423	0.865533	0.833167	-0.647849	-0.724915	-0.828396	-0.931774
Zm00001eb021230	112.105	-1.94693	0.555735	-3.50334	0.000459467	0.00213201	TRUE	-0.239247	1.07143	1.75459	-0.603263	-0.825228	-0.594539	-0.563745
Zm00001eb246450	748.925	-1.94633	0.310252	-6.27339	3.53272e-10	5.99422e-09	TRUE	1.28548	0.169375	0.752013	-1.26664	-1.41139	0.084001	0.387159
Zm00001eb348200	250.545	-1.94605	0.401516	-4.84675	1.25503e-06	1.12532e-05	TRUE	0.136043	0.890807	1.52266	-1.0608	-1.278	-0.315944	0.10524
Zm00001eb424390	1484.99	-1.94588	0.26898	-7.2343	4.67938e-13	1.15639e-11	TRUE	0.758301	0.855966	1.4833	-0.863621	-0.963062	-0.560462	-0.710417
Zm00001eb004140	258.227	-1.94555	0.521941	-3.72753	0.000193369	0.000998885	TRUE	0.727562	-0.257288	-0.337404	-0.922264	-0.986799	-0.083715	1.85991
Zm00001eb332520	1345.43	-1.94509	0.293875	-6.61875	3.6224e-11	7.06791e-10	TRUE	0.510447	1.54265	0.847495	-1.14707	-1.00243	-0.236372	-0.514711
Zm00001eb282060	85.2422	-1.94323	0.626547	-3.10149	0.00192549	0.00720662	TRUE	-0.232625	1.65299	1.08494	-0.732425	-0.885439	-0.042365	-0.845081
Zm00001eb326500	10607.2	-1.94296	0.32274	-6.0202	1.74203e-09	2.65422e-08	TRUE	0.325165	0.58908	1.88251	-0.787941	-0.827548	-0.587823	-0.593445
Zm00001eb232910	1582.17	-1.9371	0.258637	-7.48964	6.90634e-14	1.92091e-12	TRUE	0.448864	0.422737	0.275162	-1.35899	-1.43303	0.441702	1.20356
Zm00001eb347190	497.235	-1.93456	0.342462	-5.64896	1.61425e-08	2.08925e-07	TRUE	0.540165	1.25866	1.29673	-0.598304	-0.822801	-0.890266	-0.784185
Zm00001eb284300	1049.14	-1.93374	0.318058	-6.07984	1.20306e-09	1.8836e-08	TRUE	-0.006294	0.629599	1.29071	-1.25437	-1.43381	0.320962	0.453201
Zm00001eb248620	1298.88	-1.93345	0.334735	-5.77604	7.64795e-09	1.04014e-07	TRUE	1.49836	0.560122	1.01349	-0.59084	-0.844304	-0.89745	-0.739373
Zm00001eb434210	5479.44	-1.93308	0.406688	-4.75322	2.00205e-06	1.72743e-05	TRUE	2.01011	0.177227	0.430582	-0.555101	-0.652582	-0.789587	-0.620648
Zm00001eb340790	147.554	-1.9319	0.47882	-4.03471	5.46705e-05	0.000330845	TRUE	1.22156	0.575059	1.19037	-0.859832	-1.08079	-0.132516	-0.913858
Zm00001eb346660	512.757	-1.93179	0.342232	-5.64469	1.65483e-08	2.13398e-07	TRUE	0.273127	0.866558	1.62888	-1.11467	-1.01999	-0.453758	-0.180145
Zm00001eb029490	557.906	-1.92951	0.35361	-5.4566	4.85349e-08	5.75642e-07	TRUE	0.251192	0.528868	1.50279	-1.12691	-1.4439	0.17979	0.108171
Zm00001eb011720	1018.65	-1.92877	0.269932	-7.1454	8.97351e-13	2.14653e-11	TRUE	0.749942	1.28676	1.11172	-0.697058	-0.625727	-0.944586	-0.88105
Zm00001eb249190	592.888	-1.92799	0.36376	-5.30016	1.157e-07	1.29535e-06	TRUE	0.295966	0.401919	1.84829	-1.1391	-0.968829	-0.254292	-0.183962
Zm00001eb244120	1455.79	-1.92778	0.374065	-5.1536	2.55536e-07	2.65357e-06	TRUE	0.012509	0.594065	1.92572	-0.914719	-0.896578	-0.498449	-0.222545
Zm00001eb194770	152.243	-1.92745	0.451468	-4.26929	1.96096e-05	0.000135359	TRUE	0.503019	0.756456	1.68684	-0.848692	-0.876287	-0.828979	-0.392359
Zm00001eb109670	6581.66	-1.92682	0.319909	-6.02302	1.71187e-09	2.61387e-08	TRUE	0.577817	0.670779	1.71796	-0.829793	-0.774081	-0.837189	-0.525495
Zm00001eb146690	845.088	-1.92559	0.338642	-5.6862	1.29897e-08	1.69824e-07	TRUE	1.12463	0.095499	-0.196968	-1.29865	-1.30565	0.942389	0.638748
Zm00001eb052270	1274.48	-1.92553	0.255268	-7.54315	4.58736e-14	1.30143e-12	TRUE	0.894509	0.497379	1.03279	-1.31871	-1.43449	0.031799	0.296716
Zm00001eb148520	11136.7	-1.92475	0.418904	-4.59473	4.33315e-06	3.48445e-05	TRUE	-0.26995	0.959517	1.84	-0.726833	-0.670313	-0.598298	-0.534123
Zm00001eb168410	1082.31	-1.92424	0.309336	-6.22055	4.95403e-10	8.15231e-09	TRUE	0.76963	0.718269	1.34189	-1.07264	-1.27297	-0.560584	0.076409
Zm00001eb143560	526.708	-1.9232	0.286533	-6.71199	1.91994e-11	3.90737e-10	TRUE	0.73433	0.828463	1.40905	-1.10561	-1.1418	-0.377908	-0.346524
Zm00001eb229260	13841.7	-1.91757	0.472623	-4.05729	4.96453e-05	0.00030302	TRUE	-0.445087	0.882137	1.89331	-0.676994	-0.70329	-0.607073	-0.342999
Zm00001eb096980	27123.4	-1.91689	0.362222	-5.29203	1.20967e-07	1.34687e-06	TRUE	-0.074143	0.814572	1.86691	-0.830801	-0.847945	-0.515464	-0.41313
Zm00001eb261140	234.658	-1.91613	0.498783	-3.8416	0.000122234	0.000670491	TRUE	1.41748	0.353039	0.798056	-0.942333	-1.12762	-0.936841	0.438221
Zm00001eb057290	156.219	-1.91596	0.41053	-4.66704	3.05572e-06	2.53482e-05	TRUE	1.10726	0.569405	1.17373	-1.05668	-1.33395	-0.417558	-0.042209
Zm00001eb115010	1686.62	-1.91412	0.320588	-5.97064	2.36322e-09	3.53238e-08	TRUE	-0.27587	0.101926	0.810339	-1.32073	-1.22846	0.661426	1.25137
Zm00001eb173490	4029.28	-1.91411	0.416084	-4.60029	4.21911e-06	3.3966e-05	TRUE	2.09408	-0.029941	0.28966	-0.769211	-0.73351	-0.563593	-0.28749
Zm00001eb425400	596.833	-1.91236	0.354099	-5.40064	6.64037e-08	7.73347e-07	TRUE	0.850562	-0.029951	0.237801	-1.20689	-1.53223	0.874988	0.805719
Zm00001eb421860	1437.11	-1.91165	0.410808	-4.65339	3.26524e-06	2.69131e-05	TRUE	1.60751	0.370187	0.899341	-0.893469	-0.845549	-0.962246	-0.175776
Zm00001eb284330	959.191	-1.9086	0.482566	-3.95511	7.64983e-05	0.00044309	TRUE	-0.184742	1.23751	1.59496	-0.678455	-0.353753	-0.816104	-0.799417
Zm00001eb200140	1278.94	-1.90832	0.367917	-5.18682	2.13918e-07	2.2544e-06	TRUE	-0.021331	0.481822	1.92677	-0.991868	-0.994787	-0.225972	-0.17463
Zm00001eb409060	1178.32	-1.90695	0.259947	-7.33592	2.20209e-13	5.721e-12	TRUE	0.723332	1.35438	1.07345	-0.74489	-0.759582	-0.859096	-0.787587
Zm00001eb004660	3565.42	-1.90671	0.317644	-6.00265	1.9412e-09	2.93559e-08	TRUE	0.76894	0.002589	0.019542	-1.36041	-1.19848	0.355375	1.41244
Zm00001eb394010	1177.91	-1.90636	0.428762	-4.44619	8.74064e-06	6.54806e-05	TRUE	0.855148	-0.307487	-0.086227	-1.08905	-1.01909	-0.067249	1.71395
Zm00001eb044400	453.157	-1.90247	0.321756	-5.91277	3.36393e-09	4.85554e-08	TRUE	1.278	0.765868	1.11583	-0.862752	-0.769466	-0.890344	-0.637139
Zm00001eb002640	3435.37	-1.90178	0.285485	-6.66159	2.70877e-11	5.41945e-10	TRUE	0.826282	0.675245	1.04947	-1.27609	-1.2912	-0.473609	0.489897
Zm00001eb019030	237.755	-1.89915	0.412118	-4.60828	4.06017e-06	3.28355e-05	TRUE	0.494508	0.990521	1.54514	-0.771623	-0.845137	-0.904651	-0.508754
Zm00001eb311750	1855.33	-1.89836	0.323542	-5.86741	4.42653e-09	6.23538e-08	TRUE	1.07424	0.360112	1.14881	-1.1663	-1.24049	-0.579072	0.402695
Zm00001eb012770	2343.23	-1.89812	0.275485	-6.89011	5.57485e-12	1.20701e-10	TRUE	0.698899	1.05158	1.37834	-0.791364	-0.923266	-0.823806	-0.590388
Zm00001eb206670	260.593	-1.89807	0.419261	-4.52717	5.97779e-06	4.65906e-05	TRUE	0.974568	-0.044079	0.766588	-1.14935	-1.57023	0.236249	0.786249
Zm00001eb079630	122.414	-1.89783	0.488489	-3.88511	0.000102285	0.000572566	TRUE	1.16282	-0.173664	0.177505	-1.20899	-1.32645	0.221628	1.14715
Zm00001eb397610	631.445	-1.89709	0.397796	-4.76901	1.85133e-06	1.60619e-05	TRUE	1.32503	-0.157392	-0.27912	-1.17324	-1.23219	0.977905	0.53901
Zm00001eb329680	1455.9	-1.89582	0.273162	-6.94028	3.91331e-12	8.61962e-11	TRUE	0.507105	0.747324	1.37684	-1.19086	-1.36019	-0.132802	0.052583
Zm00001eb112310	822.353	-1.89539	0.320337	-5.91688	3.28106e-09	4.75402e-08	TRUE	0.643983	0.617664	0.105419	-1.58575	-1.25612	0.81705	0.657757
Zm00001eb261800	928.307	-1.89146	0.397904	-4.75355	1.99874e-06	1.72563e-05	TRUE	-0.111322	0.909122	1.83719	-0.731217	-0.80372	-0.557738	-0.542318
Zm00001eb393970	997.128	-1.88857	0.34475	-5.47809	4.29932e-08	5.13349e-07	TRUE	1.33983	0.30007	1.14505	-0.981714	-1.19488	-0.641162	0.032812
Zm00001eb362460	457.489	-1.88834	0.462834	-4.07996	4.50437e-05	0.000278529	TRUE	1.85752	-0.392826	0.000534	-1.0005	-1.08206	0.180403	0.436922
Zm00001eb322660	332.339	-1.88828	0.461301	-4.09338	4.25123e-05	0.000266322	TRUE	0.186213	-0.283279	-0.555423	-0.876771	-0.987726	1.83497	0.68202
Zm00001eb373650	206.601	-1.88788	0.411683	-4.58577	4.52317e-06	3.62697e-05	TRUE	0.094668	-0.270181	0.845457	-1.29377	-1.27809	1.15983	0.742081
Zm00001eb348390	812.625	-1.88738	0.276105	-6.83575	8.15769e-12	1.73749e-10	TRUE	1.02843	1.29307	0.854186	-0.731693	-0.884016	-0.839232	-0.720752
Zm00001eb357920	368.285	-1.88624	0.456764	-4.12957	3.63442e-05	0.000232629	TRUE	1.48226	0.011895	-0.061889	-1.07742	-1.1457	1.10702	-0.316175
Zm00001eb213420	102.01	-1.88528	0.604964	-3.11635	0.00183102	0.00690956	TRUE	0.687398	1.46555	0.26898	-0.773785	-1.33074	0.507368	-0.824769
Zm00001eb347050	196.413	-1.88477	0.454323	-4.14853	3.34618e-05	0.000216441	TRUE	-0.401111	1.11867	0.943454	-1.23494	-1.24624	0.786286	0.03389
Zm00001eb062910	630.503	-1.8839	0.288211	-6.53654	6.29586e-11	1.17975e-09	TRUE	0.969175	0.964916	1.09328	-1.27007	-1.01387	-0.279462	-0.46396
Zm00001eb002320	4942.15	-1.88361	0.368002	-5.11848	3.08011e-07	3.13875e-06	TRUE	1.46125	-0.203391	0.235905	-1.15832	-1.21592	-0.088889	0.969359
Zm00001eb155560	214.312	-1.8833	0.412075	-4.5703	4.87027e-06	3.88553e-05	TRUE	0.649515	0.758349	0.585211	-1.18338	-1.55871	-0.149934	0.898952
Zm00001eb056410	949.581	-1.88146	0.452023	-4.16232	3.15036e-05	0.000205461	TRUE	-0.102104	0.943418	1.81393	-0.663707	-0.546971	-0.608003	-0.836563
Zm00001eb053970	294.246	-1.88106	0.449992	-4.18021	2.91235e-05	0.000191791	TRUE	1.0086	0.783153	1.15186	-0.858721	-1.16064	-0.977409	0.053159
Zm00001eb105340	411.781	-1.88086	0.387191	-4.85772	1.18745e-06	1.0681e-05	TRUE	1.79983	0.239853	0.306213	-1.00884	-1.25899	0.002663	-0.080727
Zm00001eb392300	26192.1	-1.87584	0.360464	-5.20396	1.95085e-07	2.06677e-06	TRUE	0.508902	0.476261	1.70469	-1.02243	-0.963442	-0.791789	0.087812
Zm00001eb001010	459.474	-1.87518	0.581098	-3.22696	0.00125113	0.00502613	TRUE	-0.799746	1.321	1.25259	-0.823483	-0.904833	0.50091	-0.546447
Zm00001eb434290	759.915	-1.87389	0.49589	-3.77884	0.000157562	0.000835832	TRUE	2.0732	-0.289856	0.048527	-0.739701	-0.92602	-0.396929	0.230782
Zm00001eb299250	327.248	-1.87382	0.442824	-4.23153	2.3211e-05	0.000156934	TRUE	0.772986	0.61093	1.60112	-0.59211	-1.12038	-0.477899	-0.79464
Zm00001eb301170	426.013	-1.87246	0.4061	-4.61084	4.01049e-06	3.25025e-05	TRUE	1.91452	0.273779	0.571843	-0.665694	-0.574931	-0.712313	-0.807203
Zm00001eb274840	198.797	-1.87231	0.386643	-4.84247	1.28235e-06	1.14548e-05	TRUE	0.818574	0.832525	1.46127	-0.540785	-0.801448	-0.890185	-0.879955
Zm00001eb276260	330.575	-1.87171	0.348511	-5.3706	7.84741e-08	9.0207e-07	TRUE	0.028605	-0.2619	-0.357945	-1.02917	-1.05872	1.46905	1.21008
Zm00001eb206840	94.1946	-1.87146	0.56248	-3.32716	0.000877363	0.00371504	TRUE	0.329941	0.454967	1.9252	-0.534451	-0.952594	-0.476046	-0.747021
Zm00001eb352350	4647.58	-1.87019	0.28364	-6.59355	4.29426e-11	8.25394e-10	TRUE	0.193841	0.900935	1.43797	-1.26095	-1.19249	0.144475	-0.223782
Zm00001eb061240	234.703	-1.86883	0.382269	-4.88878	1.01464e-06	9.2677e-06	TRUE	-0.076093	0.171231	0.94821	-1.37522	-1.32323	0.663371	0.991737
Zm00001eb042040	2194.94	-1.86782	0.285419	-6.54414	5.98399e-11	1.12577e-09	TRUE	0.815187	0.510965	1.6392	-0.894529	-1.00404	-0.604515	-0.462267
Zm00001eb118010	197.834	-1.86781	0.461492	-4.04732	5.18075e-05	0.000315133	TRUE	1.92283	0.488934	0.349404	-0.666775	-0.580279	-0.673375	-0.840739
Zm00001eb228740	560.352	-1.86752	0.499946	-3.73545	0.000187383	0.00097257	TRUE	0.256344	0.312458	2.02132	-0.620237	-0.53867	-0.554566	-0.87665
Zm00001eb198730	3170.18	-1.8664	0.262646	-7.10616	1.1932e-12	2.793e-11	TRUE	0.732153	0.750839	1.58604	-0.863492	-0.830375	-0.642898	-0.732266
Zm00001eb204600	2243.1	-1.8663	0.307268	-6.07385	1.2488e-09	1.95091e-08	TRUE	1.01279	0.564219	1.33992	-1.0481	-1.105	-0.734945	-0.028888
Zm00001eb147420	5321.51	-1.86519	0.319251	-5.84238	5.14603e-09	7.19177e-08	TRUE	0.184527	1.00577	1.57262	-1.04771	-0.998531	-0.612973	-0.103694
Zm00001eb388300	245.46	-1.86472	0.431726	-4.31921	1.56586e-05	0.000110232	TRUE	1.81987	0.246534	0.068063	-1.19674	-1.04548	0.267957	-0.160202
Zm00001eb356050	7882.38	-1.8647	0.257722	-7.23531	4.64474e-13	1.15185e-11	TRUE	0.160605	0.699459	1.06888	-1.34685	-1.44023	0.221715	0.636426
Zm00001eb403660	980.625	-1.86351	0.291743	-6.38751	1.68609e-10	2.97847e-09	TRUE	1.42304	0.383737	1.0192	-1.07587	-1.21171	-0.364747	-0.173649
Zm00001eb089410	811.159	-1.8635	0.293265	-6.35432	2.09353e-10	3.65273e-09	TRUE	-0.00726	0.728823	0.847924	-1.44278	-1.36474	0.759196	0.478836
Zm00001eb334150	1653.57	-1.86235	0.335372	-5.55309	2.80656e-08	3.49833e-07	TRUE	1.40978	0.300705	1.27804	-0.581074	-0.71449	-0.907876	-0.785078
Zm00001eb395270	5221.93	-1.8614	0.291969	-6.37533	1.82571e-10	3.21311e-09	TRUE	0.546689	0.826973	1.5568	-0.928379	-1.13804	-0.609922	-0.254119
Zm00001eb061520	2796.84	-1.86034	0.456123	-4.07859	4.53098e-05	0.000279437	TRUE	1.94254	-0.02882	-0.249048	-0.974538	-0.880593	-0.363231	0.55369
Zm00001eb319240	3441.2	-1.85902	0.300353	-6.18946	6.0369e-10	9.75324e-09	TRUE	0.539578	0.756224	1.68978	-0.656525	-0.612954	-0.892426	-0.82368
Zm00001eb142510	334.711	-1.8586	0.427058	-4.35211	1.34836e-05	9.64524e-05	TRUE	-0.062664	0.74877	0.867248	-1.23816	-1.19082	-0.383421	1.25904
Zm00001eb099170	99.8951	-1.85722	0.455369	-4.0785	4.53273e-05	0.000279437	TRUE	0.725639	1.02137	1.36115	-1.08641	-0.813772	-0.655976	-0.552
Zm00001eb125530	496.906	-1.85673	0.485878	-3.8214	0.000132699	0.000720372	TRUE	-0.431821	0.890575	1.8823	-0.717989	-0.753903	-0.345827	-0.523334
Zm00001eb130340	2159.75	-1.85617	0.254983	-7.27958	3.34857e-13	8.46692e-12	TRUE	1.00486	0.538069	1.40373	-1.13458	-1.07935	-0.297244	-0.435488
Zm00001eb074610	1312.26	-1.85554	0.294224	-6.30653	2.85352e-10	4.90038e-09	TRUE	0.800412	0.525983	1.3823	-1.19676	-1.21367	-0.482462	0.184197
Zm00001eb370330	59248.4	-1.85214	0.413956	-4.47424	7.66851e-06	5.8252e-05	TRUE	0.041944	0.909297	1.74408	-0.818375	-0.794325	-0.889803	-0.192815
Zm00001eb326670	310.245	-1.8521	0.369643	-5.01051	5.42872e-07	5.24566e-06	TRUE	1.05863	0.098772	-0.020832	-1.35028	-1.31295	0.483476	1.04319
Zm00001eb211100	336.365	-1.85132	0.364382	-5.08073	3.75995e-07	3.76977e-06	TRUE	1.2357	0.11765	1.01767	-1.16212	-1.40114	-0.117609	0.309859
Zm00001eb310520	1119.06	-1.85084	0.247848	-7.46766	8.16363e-14	2.23987e-12	TRUE	0.608461	0.727127	0.894636	-1.38418	-1.45889	0.491591	0.121259
Zm00001eb346680	1939.37	-1.84972	0.320205	-5.77666	7.61997e-09	1.038e-07	TRUE	0.393402	0.282106	0.949697	-1.22539	-1.4632	-0.04094	1.10432
Zm00001eb390910	261.564	-1.84841	0.440378	-4.19734	2.70071e-05	0.000179689	TRUE	1.89186	0.332592	0.538664	-0.635508	-0.930259	-0.468269	-0.729081
Zm00001eb122340	2220.57	-1.84805	0.345857	-5.34338	9.12281e-08	1.03858e-06	TRUE	0.241106	0.839326	1.68876	-0.997409	-0.925116	-0.720334	-0.126328
Zm00001eb358080	4451.14	-1.84777	0.270574	-6.82909	8.54577e-12	1.8147e-10	TRUE	0.816588	1.13173	1.22453	-0.807207	-0.763454	-0.668854	-0.933328
Zm00001eb059210	1072.59	-1.84759	0.563449	-3.27907	0.00104149	0.00428095	TRUE	2.01349	-0.487312	-0.505962	-0.804794	-0.78174	0.154283	0.412033
Zm00001eb221190	437.312	-1.84715	0.428302	-4.31272	1.61258e-05	0.000113214	TRUE	0.130223	1.29404	1.44774	-1.03204	-0.591035	-0.529	-0.719928
Zm00001eb295860	168.428	-1.84643	0.607869	-3.03755	0.00238514	0.00866406	TRUE	0.887805	-0.69517	0.032678	-0.853205	-0.982983	1.73705	-0.126174
Zm00001eb233350	183.376	-1.84583	0.366885	-5.0311	4.87662e-07	4.75756e-06	TRUE	0.858385	0.572467	0.640627	-1.43816	-1.43257	0.605906	0.193342
Zm00001eb048810	5398.1	-1.84572	0.370628	-4.97999	6.35884e-07	6.07408e-06	TRUE	1.0694	0.359288	1.51312	-0.791918	-0.917018	-0.940252	-0.292622
Zm00001eb424670	507.993	-1.84139	0.435026	-4.23282	2.30779e-05	0.000156407	TRUE	1.11173	-0.284125	0.480474	-1.06961	-1.25993	-0.263641	1.2851
Zm00001eb323580	594.074	-1.84047	0.350172	-5.25591	1.4729e-07	1.60101e-06	TRUE	0.18958	0.879986	1.74882	-0.855043	-0.93044	-0.539556	-0.493342
Zm00001eb349240	9311.55	-1.83989	0.29768	-6.18075	6.37972e-10	1.02837e-08	TRUE	1.51798	0.602464	0.94789	-0.854398	-0.80435	-0.883425	-0.526166
Zm00001eb361620	387.884	-1.83935	0.430698	-4.27063	1.94924e-05	0.00013468	TRUE	-0.03233	-0.168685	-0.497586	-0.853974	-0.921261	1.97346	0.500379
Zm00001eb080830	2423.25	-1.83636	0.335064	-5.48061	4.2385e-08	5.07368e-07	TRUE	0.375561	0.805538	1.63377	-1.02401	-0.964428	-0.745349	-0.08108
Zm00001eb432830	359.506	-1.83499	0.352721	-5.20237	1.96766e-07	2.08293e-06	TRUE	0.01781	0.330643	1.00422	-1.34994	-1.35352	0.278391	1.0724
Zm00001eb335140	282.129	-1.83437	0.404726	-4.53236	5.83276e-06	4.56862e-05	TRUE	-0.077317	-0.071115	-0.023712	-0.993133	-1.16198	1.85059	0.476658
Zm00001eb265270	2206.74	-1.83429	0.372406	-4.92552	8.41368e-07	7.81317e-06	TRUE	0.01947	0.869292	1.82204	-0.715233	-0.85849	-0.689131	-0.447948
Zm00001eb042710	371.088	-1.83377	0.567212	-3.23296	0.00122514	0.0049371	TRUE	-0.507772	1.42343	1.28151	-0.871112	-0.746291	0.253223	-0.832982
Zm00001eb329540	711.094	-1.83108	0.382269	-4.79003	1.66758e-06	1.46016e-05	TRUE	-0.03411	0.75783	1.86366	-0.940864	-0.860046	-0.485786	-0.300684
Zm00001eb024290	898.217	-1.8301	0.361248	-5.06605	4.06153e-07	4.02605e-06	TRUE	0.299069	0.807086	1.77612	-0.72609	-0.626921	-0.678031	-0.851234
Zm00001eb045470	5967.61	-1.82912	0.341695	-5.35307	8.64754e-08	9.87644e-07	TRUE	1.76587	-0.053519	0.357174	-1.07889	-1.24286	0.052729	0.199493
Zm00001eb075710	163.053	-1.82619	0.499854	-3.65344	0.00025875	0.00129558	TRUE	1.53921	0.220718	0.262153	-1.02634	-1.20283	0.807734	-0.60065
Zm00001eb248190	1353.07	-1.82595	0.251864	-7.24974	4.17569e-13	1.04099e-11	TRUE	0.546331	1.16806	0.869851	-1.29917	-1.35748	-0.117572	0.189981
Zm00001eb021880	382.14	-1.82588	0.362263	-5.04021	4.65023e-07	4.55864e-06	TRUE	1.61908	0.152925	0.867728	-1.05542	-1.16058	-0.372492	-0.051245
Zm00001eb053680	4854.5	-1.82461	0.277318	-6.57948	4.72106e-11	9.02538e-10	TRUE	1.38374	0.123145	0.544533	-1.35848	-1.30821	0.19057	0.424705
Zm00001eb273570	2903.17	-1.8233	0.322236	-5.65828	1.52893e-08	1.98244e-07	TRUE	1.39257	0.476937	1.17959	-0.841137	-0.827446	-0.910213	-0.470301
Zm00001eb261260	123.594	-1.82306	0.608024	-2.99834	0.00271453	0.00963123	TRUE	-0.335979	1.15179	1.64787	-0.615112	-0.853053	-0.148886	-0.846631
Zm00001eb241500	5851.61	-1.82255	0.464149	-3.92665	8.61369e-05	0.000491691	TRUE	-0.08679	1.68737	1.08264	-0.888004	-0.499047	-0.429551	-0.866617
Zm00001eb249330	4521.5	-1.82238	0.374756	-4.86283	1.15718e-06	1.04352e-05	TRUE	1.80632	-0.057515	0.254214	-1.07702	-1.08111	-0.327692	0.482809
Zm00001eb098230	282.377	-1.82141	0.391694	-4.65009	3.31789e-06	2.73153e-05	TRUE	0.950218	0.020284	-0.164692	-1.22933	-1.33312	1.22345	0.533187
Zm00001eb023810	2704.77	-1.82103	0.277976	-6.55104	5.71384e-11	1.07924e-09	TRUE	0.407638	1.1923	1.4315	-0.920308	-0.835669	-0.684331	-0.591132
Zm00001eb174610	736.541	-1.82009	0.379044	-4.80181	1.57241e-06	1.38367e-05	TRUE	-0.434103	1.03488	0.250812	-1.21341	-1.23981	1.23987	0.36177
Zm00001eb395200	293.667	-1.81932	0.375287	-4.8478	1.24837e-06	1.12006e-05	TRUE	0.697037	0.316017	1.40254	-1.12196	-1.42933	-0.193086	0.328781
Zm00001eb148020	521.48	-1.81832	0.325857	-5.58013	2.40338e-08	3.02771e-07	TRUE	0.567449	0.821987	1.63555	-0.680016	-0.639778	-0.882109	-0.823082
Zm00001eb047920	239.66	-1.81785	0.418004	-4.34888	1.36834e-05	9.77826e-05	TRUE	-0.037524	1.18654	1.14245	-1.28016	-1.12739	0.487546	-0.371458
Zm00001eb055750	517.065	-1.8175	0.371701	-4.88967	1.01003e-06	9.23148e-06	TRUE	0.230219	0.696611	1.66299	-0.955902	-1.27216	0.041171	-0.402927
Zm00001eb139130	2622.67	-1.81729	0.280474	-6.47936	9.21152e-11	1.69037e-09	TRUE	1.31893	0.054535	0.73949	-1.3155	-1.35142	0.265221	0.288742
Zm00001eb157010	727.439	-1.81701	0.340588	-5.33493	9.55825e-08	1.08641e-06	TRUE	0.161345	1.06749	1.5763	-1.08588	-0.905846	-0.308697	-0.504714
Zm00001eb079360	982.041	-1.8169	0.263445	-6.89671	5.32207e-12	1.1561e-10	TRUE	1.15999	0.884079	1.03753	-1.02222	-1.11951	-0.637968	-0.30189
Zm00001eb431260	659.605	-1.81556	0.531002	-3.41912	0.00062824	0.00280857	TRUE	1.62283	-0.393069	-0.636017	-0.890737	-1.00553	0.929309	0.373221
Zm00001eb373140	1649.08	-1.81391	0.299132	-6.06392	1.3284e-09	2.05938e-08	TRUE	0.944276	0.072286	0.286864	-1.28842	-1.41531	0.265839	1.13447
Zm00001eb312930	380.593	-1.81271	0.369044	-4.91191	9.01916e-07	8.31839e-06	TRUE	0.902506	0.899409	1.34718	-0.745886	-0.80991	-0.996703	-0.596598
Zm00001eb247190	3286.82	-1.81264	0.35689	-5.07898	3.79472e-07	3.79338e-06	TRUE	1.60858	0.415324	0.274552	-1.01228	-1.32715	-0.414085	0.455065
Zm00001eb094340	1097.08	-1.81227	0.354489	-5.11235	3.18176e-07	3.23769e-06	TRUE	1.80634	0.282115	0.153301	-1.06471	-1.18201	-0.224741	0.229711
Zm00001eb120180	364.738	-1.8122	0.34507	-5.25169	1.50711e-07	1.63318e-06	TRUE	1.4237	0.133898	0.641135	-1.36924	-1.25586	0.188476	0.237889
Zm00001eb298350	3572.38	-1.80916	0.49108	-3.68404	0.000229568	0.00116394	TRUE	2.16439	-0.321992	0.075552	-0.627163	-0.780278	-0.447037	-0.063471
Zm00001eb213310	4130.47	-1.80797	0.429247	-4.21195	2.53178e-05	0.000169562	TRUE	-0.064002	1.1203	1.63352	-0.448194	-0.385157	-0.928232	-0.928232
Zm00001eb416210	847.743	-1.80756	0.407349	-4.43738	9.1061e-06	6.79485e-05	TRUE	1.67722	0.047738	-0.273283	-1.08291	-1.17969	0.076208	0.734711
Zm00001eb315040	100.6	-1.80693	0.491524	-3.67618	0.000236754	0.00119655	TRUE	-0.158134	0.076522	-0.384742	-1.13236	-1.02017	1.12392	1.49496
Zm00001eb328560	327.998	-1.8069	0.550981	-3.27943	0.00104017	0.00428095	TRUE	-0.236205	1.27062	1.5662	-0.641393	-0.303417	-0.792815	-0.862989
Zm00001eb358050	6051.01	-1.80603	0.451506	-4.00001	6.33407e-05	0.000376417	TRUE	-0.366259	1.0559	1.76367	-0.760115	-0.676356	-0.718435	-0.298396
Zm00001eb223080	986.057	-1.80385	0.32786	-5.50188	3.75767e-08	4.55967e-07	TRUE	-0.073057	0.096532	0.728105	-1.26614	-1.25448	0.287182	1.48186
Zm00001eb244460	1262.69	-1.80314	0.293198	-6.14991	7.75293e-10	1.23291e-08	TRUE	0.611848	0.805577	1.52998	-1.08376	-0.998189	-0.220071	-0.645383
Zm00001eb276750	211.903	-1.80002	0.389789	-4.61792	3.87602e-06	3.15441e-05	TRUE	0.366827	1.15466	1.49778	-0.700592	-0.790363	-0.81647	-0.711844
Zm00001eb258350	1292.62	-1.79776	0.311505	-5.77121	7.87048e-09	1.06631e-07	TRUE	0.591714	0.926309	1.50008	-0.898448	-0.98884	-0.807465	-0.323353
Zm00001eb386990	543.491	-1.79774	0.4313	-4.16819	3.07031e-05	0.000201073	TRUE	-0.620803	1.25996	0.76542	-1.09107	-1.29742	0.696224	0.28769
Zm00001eb343590	789.513	-1.79764	0.321794	-5.58632	2.31936e-08	2.92706e-07	TRUE	0.283198	1.07833	1.48302	-1.0065	-1.08444	-0.582526	-0.171076
Zm00001eb223980	5180.11	-1.79738	0.547496	-3.28291	0.0010274	0.00424147	TRUE	-0.644399	1.55012	1.36342	-0.634325	-0.557868	-0.417096	-0.659852
Zm00001eb085780	794.089	-1.79731	0.389923	-4.6094	4.03836e-06	3.26778e-05	TRUE	1.91478	0.290038	0.542474	-0.653682	-0.819308	-0.487593	-0.786707
Zm00001eb280040	2140.11	-1.79408	0.366685	-4.89271	9.9458e-07	9.11581e-06	TRUE	0.314702	0.405683	1.96844	-0.665493	-0.829079	-0.69266	-0.501593
Zm00001eb082870	668.763	-1.79369	0.483928	-3.70651	0.000210131	0.00107568	TRUE	2.01644	0.641647	-0.262046	-0.562091	-0.582428	-0.71319	-0.53833
Zm00001eb091000	505.534	-1.79285	0.342233	-5.23868	1.61726e-07	1.7419e-06	TRUE	0.155757	0.651547	1.36936	-1.17477	-1.46541	0.088332	0.375185
Zm00001eb081250	1152.47	-1.7926	0.344739	-5.19986	1.99443e-07	2.1097e-06	TRUE	0.258369	0.993565	1.66374	-0.792581	-0.763288	-0.826036	-0.533771
Zm00001eb153060	403.789	-1.79111	0.364492	-4.91401	8.92322e-07	8.23526e-06	TRUE	0.365918	0.965027	1.06922	-1.10569	-1.51801	-0.234457	0.457989
Zm00001eb229930	29582.4	-1.78835	0.283492	-6.3083	2.82122e-10	4.85078e-09	TRUE	1.2021	0.21803	1.37571	-1.05646	-1.11491	-0.486495	-0.137977
Zm00001eb148950	525.472	-1.78833	0.317836	-5.62656	1.83838e-08	2.35144e-07	TRUE	1.46618	0.438018	1.08856	-0.990596	-0.949935	-0.391468	-0.660755
Zm00001eb152250	2310.95	-1.7883	0.420135	-4.25648	2.07669e-05	0.000141897	TRUE	-0.164786	0.784062	1.88957	-0.776489	-0.773525	-0.731084	-0.227745
Zm00001eb191680	716.778	-1.78713	0.31197	-5.72853	1.01306e-08	1.34302e-07	TRUE	0.69984	0.440202	0.582911	-1.50704	-1.28056	1.03178	0.032871
Zm00001eb283070	1828.82	-1.78614	0.504238	-3.54227	0.000396706	0.00187451	TRUE	1.27085	1.55771	-0.326329	-0.618389	-0.800026	-0.193883	-0.889927
Zm00001eb004380	2465.57	-1.78539	0.339555	-5.25802	1.45611e-07	1.58518e-06	TRUE	1.44828	0.01958	0.147895	-1.28531	-1.20175	-0.014011	0.885326
Zm00001eb365840	2963.4	-1.78394	0.564629	-3.15949	0.00158045	0.00609534	TRUE	-0.691112	2.07678	0.388111	-0.689776	-0.644346	-0.031287	-0.408371
Zm00001eb269430	875.1	-1.78101	0.360816	-4.93606	7.97159e-07	7.43928e-06	TRUE	0.510325	0.027304	0.190714	-1.15303	-1.23434	-0.028732	1.68776
Zm00001eb151930	1515.08	-1.78003	0.426956	-4.16913	3.05763e-05	0.000200356	TRUE	-0.291993	0.747502	1.93236	-0.908386	-0.69373	-0.451331	-0.334423
Zm00001eb295090	646.485	-1.77967	0.397874	-4.47295	7.71478e-06	5.84896e-05	TRUE	1.48681	-0.011299	0.042755	-1.17	-1.17326	-0.17983	1.00482
Zm00001eb137900	21825.8	-1.77879	0.352595	-5.04486	4.53852e-07	4.45837e-06	TRUE	0.319899	0.966459	1.57954	-0.98637	-0.84173	-0.871545	-0.166256
Zm00001eb203470	6570.42	-1.77872	0.291447	-6.10307	1.04051e-09	1.6327e-08	TRUE	1.61242	0.194009	0.514499	-1.23446	-1.22693	-0.100993	0.241457
Zm00001eb260060	2740.3	-1.77533	0.312852	-5.67464	1.38977e-08	1.81027e-07	TRUE	1.30548	0.04093	0.822203	-1.15342	-1.47101	0.327616	0.128207
Zm00001eb141930	3187.12	-1.77506	0.380503	-4.66503	3.08568e-06	2.55519e-05	TRUE	-0.500236	-0.029054	-0.316198	-0.970993	-0.82796	0.810332	1.83411
Zm00001eb316730	347.908	-1.77373	0.362432	-4.89398	9.88163e-07	9.07174e-06	TRUE	0.056063	0.878734	1.39747	-1.35015	-1.16616	0.281757	-0.097717
Zm00001eb422190	2056.12	-1.77371	0.433886	-4.08796	4.35183e-05	0.000270986	TRUE	-0.850677	0.936481	0.887101	-1.17598	-1.14524	0.607355	0.74096
Zm00001eb027590	882.563	-1.77328	0.28585	-6.20354	5.52054e-10	9.01975e-09	TRUE	1.27097	0.567993	0.713994	-1.19019	-1.45177	-0.065221	0.154219
Zm00001eb285590	472.888	-1.77026	0.400765	-4.41721	9.99821e-06	7.36751e-05	TRUE	0.893709	-0.065952	-0.523463	-1.14072	-1.21838	0.913093	1.14171
Zm00001eb068630	948.782	-1.76576	0.294613	-5.99352	2.05352e-09	3.07919e-08	TRUE	1.2059	0.605335	1.25751	-1.11566	-0.851113	-0.655374	-0.446597
Zm00001eb334960	1919.52	-1.76554	0.45256	-3.90123	9.57045e-05	0.000539574	TRUE	-0.344085	0.728371	1.9649	-0.75901	-0.654518	-0.622766	-0.312895
Zm00001eb274250	855.309	-1.76464	0.329538	-5.3549	8.56022e-08	9.79248e-07	TRUE	0.10804	0.403283	1.31517	-1.43239	-1.2175	0.077813	0.74559
Zm00001eb249730	618.553	-1.76463	0.426302	-4.1394	3.4822e-05	0.000224115	TRUE	2.0835	0.288361	0.082977	-0.626189	-0.808003	-0.470598	-0.550047
Zm00001eb001910	269.079	-1.76379	0.381154	-4.62749	3.70132e-06	3.02263e-05	TRUE	0.538784	0.486845	1.1744	-1.61404	-1.14258	0.16008	0.396517
Zm00001eb109620	66435.8	-1.76234	0.333276	-5.28793	1.23707e-07	1.37307e-06	TRUE	0.163505	0.796733	1.82323	-0.821241	-0.780982	-0.717613	-0.463637
Zm00001eb160350	1535.21	-1.76062	0.345605	-5.09433	3.4998e-07	3.53594e-06	TRUE	-0.161647	1.04662	1.38697	-1.22393	-1.122	-0.275387	0.349369
Zm00001eb295320	6422.86	-1.76037	0.291687	-6.03513	1.58838e-09	2.43845e-08	TRUE	0.400315	1.10626	1.445	-0.963639	-1.00159	-0.727362	-0.258982
Zm00001eb015400	326.14	-1.75961	0.50122	-3.51066	0.000447002	0.00208165	TRUE	0.808198	-0.363568	0.984102	-0.905616	-1.37411	1.19223	-0.341243
Zm00001eb357750	1672.48	-1.75748	0.420334	-4.18115	2.90042e-05	0.000191093	TRUE	-0.156096	1.09839	1.71331	-0.523121	-0.543007	-0.826567	-0.762905
Zm00001eb432000	220.247	-1.75596	0.476738	-3.68328	0.000230255	0.0011663	TRUE	1.24535	0.520338	1.27559	-0.44361	-1.12121	-0.798757	-0.677704
Zm00001eb387010	19167.6	-1.75441	0.411786	-4.26049	2.03982e-05	0.000139917	TRUE	-0.278223	0.691555	1.97763	-0.706906	-0.78745	-0.524457	-0.372145
Zm00001eb076830	397.861	-1.75405	0.334215	-5.24827	1.53535e-07	1.65998e-06	TRUE	1.43158	0.42909	1.19302	-0.824485	-0.742276	-0.802263	-0.684671
Zm00001eb315010	2545.73	-1.75325	0.383533	-4.57131	4.84681e-06	3.869e-05	TRUE	-0.202883	1.22393	1.62618	-0.79605	-0.755451	-0.624236	-0.471488
Zm00001eb208320	576.408	-1.75135	0.321758	-5.44306	5.23733e-08	6.1858e-07	TRUE	0.311494	-0.085633	-0.247507	-1.13763	-1.20755	0.808556	1.55828
Zm00001eb233140	35925.1	-1.75116	0.327526	-5.34664	8.96024e-08	1.02171e-06	TRUE	1.63235	0.396837	0.903417	-0.929244	-0.80657	-0.854906	-0.341882
Zm00001eb255570	655.414	-1.75104	0.303646	-5.76671	8.08356e-09	1.08997e-07	TRUE	0.682698	1.03032	1.41277	-0.880604	-0.631294	-0.798978	-0.814912
Zm00001eb259480	486.573	-1.75049	0.437623	-4	6.33421e-05	0.000376417	TRUE	1.49732	-0.232175	-0.23472	-1.03893	-1.22533	0.225086	1.00874
Zm00001eb177390	590.54	-1.74987	0.28016	-6.24598	4.2115e-10	7.06983e-09	TRUE	0.608091	1.10945	0.857012	-1.25798	-1.43098	-0.061358	0.175773
Zm00001eb072800	221.7	-1.74946	0.494772	-3.53589	0.000406398	0.0019152	TRUE	-0.322931	0.335872	1.62137	-0.985044	-1.1467	-0.361659	0.859085
Zm00001eb319250	34352.9	-1.74913	0.294338	-5.9426	2.80534e-09	4.13657e-08	TRUE	1.59257	0.247973	1.03269	-0.944177	-0.966403	-0.634685	-0.327964
Zm00001eb316450	1795.04	-1.74762	0.271517	-6.4365	1.22256e-10	2.20077e-09	TRUE	0.027448	0.653894	0.7892	-1.41978	-1.36863	0.349479	0.968388
Zm00001eb400630	636.876	-1.74653	0.420426	-4.15419	3.26439e-05	0.000211924	TRUE	-0.484727	0.107921	-0.25346	-0.889114	-1.15266	1.34238	1.32967
Zm00001eb365980	3132.18	-1.74643	0.320839	-5.44332	5.22974e-08	6.18198e-07	TRUE	0.564875	0.657473	1.60597	-1.05594	-0.994811	-0.751105	-0.026456
Zm00001eb208690	11157.9	-1.74576	0.272859	-6.39806	1.57368e-10	2.79382e-09	TRUE	0.625174	0.678155	1.60135	-0.990558	-1.09821	-0.227943	-0.58797
Zm00001eb224120	203.585	-1.74568	0.495884	-3.52034	0.000431001	0.00201441	TRUE	0.119036	0.322775	0.639562	-1.17934	-1.04282	1.65289	-0.512098
Zm00001eb287150	584.698	-1.74545	0.39736	-4.39262	1.11992e-05	8.17181e-05	TRUE	-0.497957	0.721829	1.00689	-1.12679	-1.42043	0.836229	0.480227
Zm00001eb000060	181.279	-1.74523	0.572359	-3.04919	0.00229462	0.00838677	TRUE	2.13987	-0.249329	0.191019	-0.52222	-0.847465	-0.553412	-0.158466
Zm00001eb098100	272.546	-1.7441	0.58294	-2.9919	0.00277243	0.0098072	TRUE	-0.428764	0.740837	1.86348	-0.724988	-0.73693	0.12869	-0.842329
Zm00001eb270930	785.323	-1.74395	0.392234	-4.4462	8.74015e-06	6.54806e-05	TRUE	0.37445	0.577646	1.57897	-0.905308	-1.30115	0.321278	-0.645889
Zm00001eb389600	2380.87	-1.74337	0.302513	-5.76294	8.26607e-09	1.11247e-07	TRUE	0.310552	0.339801	1.15022	-1.26324	-1.40184	-0.082744	0.947262
Zm00001eb028440	7746.77	-1.7422	0.296543	-5.87504	4.22754e-09	6.00276e-08	TRUE	0.15752	1.09213	0.795905	-1.28732	-1.32852	-0.245977	0.81627
Zm00001eb359660	809.604	-1.74207	0.381384	-4.56776	4.92963e-06	3.92406e-05	TRUE	1.83981	0.239702	0.723433	-0.633758	-0.528442	-0.880988	-0.75976
Zm00001eb237920	2043.72	-1.74169	0.445032	-3.91362	9.09239e-05	0.000516109	TRUE	-0.448674	1.04721	1.7885	-0.713703	-0.74923	-0.515094	-0.409004
Zm00001eb119100	1000.91	-1.73961	0.316835	-5.49057	4.00632e-08	4.82424e-07	TRUE	0.403371	1.46488	1.15221	-0.784354	-0.902565	-0.517092	-0.816455
Zm00001eb013550	1527.81	-1.73797	0.245608	-7.0762	1.48157e-12	3.41726e-11	TRUE	0.672892	1.11884	1.13854	-1.13675	-1.23311	-0.401329	-0.159093
Zm00001eb269160	1071.4	-1.73642	0.3075	-5.6469	1.63364e-08	2.11241e-07	TRUE	-0.088125	0.607442	1.15551	-1.38772	-1.31324	0.748852	0.277283
Zm00001eb107700	1917.43	-1.73394	0.329159	-5.26778	1.38081e-07	1.51133e-06	TRUE	1.794	0.273455	0.710681	-0.922754	-0.911679	-0.279745	-0.663955
Zm00001eb021400	924.042	-1.73378	0.332506	-5.2143	1.84515e-07	1.96645e-06	TRUE	0.301243	0.862595	1.50572	-1.07705	-1.16777	0.164504	-0.589238
Zm00001eb296690	1264.52	-1.73338	0.329708	-5.25732	1.46168e-07	1.59003e-06	TRUE	0.084105	0.86561	1.65435	-0.994034	-1.17871	-0.350383	-0.080937
Zm00001eb200390	1405.62	-1.73269	0.379815	-4.56193	5.06849e-06	4.02782e-05	TRUE	1.70827	-0.09214	0.496969	-1.02545	-1.1693	-0.408732	0.490385
Zm00001eb062800	3201.6	-1.73142	0.499471	-3.46651	0.000527259	0.0024103	TRUE	-0.42764	0.85075	1.80965	-0.751168	-0.76521	-0.812123	0.095739
Zm00001eb015240	249.298	-1.73067	0.375156	-4.6132	3.96522e-06	3.21962e-05	TRUE	1.25534	0.28924	1.271	-1.1818	-1.02261	-0.086625	-0.524546
Zm00001eb163290	7584.54	-1.73036	0.269969	-6.40946	1.46039e-10	2.60247e-09	TRUE	0.461492	1.44204	1.07802	-1.04831	-0.95615	-0.654228	-0.322862
Zm00001eb106160	975.209	-1.72794	0.42126	-4.10184	4.09875e-05	0.000258059	TRUE	2.04156	-0.204692	0.239437	-1.002	-0.828204	-0.043766	-0.20234
Zm00001eb209550	19296.5	-1.72567	0.386614	-4.46356	8.06073e-06	6.08134e-05	TRUE	-0.093503	0.471647	2.03976	-0.761466	-0.796599	-0.539705	-0.320138
Zm00001eb297450	461.387	-1.72427	0.308561	-5.5881	2.29572e-08	2.8998e-07	TRUE	0.53955	0.813458	1.39516	-1.17644	-1.26136	-0.352032	0.04166
Zm00001eb212760	2513.25	-1.72263	0.379578	-4.53828	5.67143e-06	4.46196e-05	TRUE	1.90382	0.082834	0.703397	-0.733038	-0.705474	-0.79257	-0.458966
Zm00001eb084870	1408.77	-1.7225	0.288706	-5.96626	2.42757e-09	3.61712e-08	TRUE	0.802859	0.585302	1.59726	-0.892415	-1.0353	-0.659222	-0.398481
Zm00001eb024490	833.722	-1.72218	0.338611	-5.08602	3.65662e-07	3.68128e-06	TRUE	1.53523	-0.040652	0.795362	-1.17981	-1.21658	-0.202849	0.309302
Zm00001eb323940	743.123	-1.72144	0.311896	-5.51928	3.40394e-08	4.1625e-07	TRUE	1.27761	0.604001	0.178727	-1.29034	-1.37419	0.644915	-0.040716
Zm00001eb257200	8975.21	-1.72078	0.389119	-4.42224	9.76834e-06	7.2244e-05	TRUE	-0.326534	0.177001	1.45775	-1.13457	-1.10942	-0.157054	1.09283
Zm00001eb126420	1448.61	-1.72036	0.325522	-5.28493	1.25753e-07	1.39251e-06	TRUE	1.14439	0.050753	1.17161	-1.24097	-1.18811	-0.394038	0.456366
Zm00001eb201570	24183.1	-1.72009	0.408174	-4.2141	2.50776e-05	0.000168192	TRUE	1.94266	-0.314081	0.218171	-0.917809	-1.02838	-0.246049	0.345486
Zm00001eb005340	1182.56	-1.71991	0.346389	-4.96527	6.86044e-07	6.50504e-06	TRUE	0.133618	1.0569	1.66987	-0.867461	-0.669336	-0.652664	-0.670935
Zm00001eb415420	546.473	-1.71947	0.371008	-4.63459	3.57643e-06	2.92739e-05	TRUE	0.653263	1.12289	0.983914	-1.22012	-1.04047	-0.819055	0.319584
Zm00001eb284630	1926.87	-1.71906	0.259977	-6.61235	3.78257e-11	7.3703e-10	TRUE	0.923363	0.673881	1.38295	-1.02131	-1.18096	-0.531123	-0.246799
Zm00001eb139900	976.238	-1.71883	0.355486	-4.83517	1.3303e-06	1.18681e-05	TRUE	1.49597	0.487651	0.712095	-1.03197	-1.14311	-0.765278	0.244647
Zm00001eb360390	382.344	-1.71848	0.372026	-4.61925	3.85131e-06	3.1361e-05	TRUE	1.10766	0.60312	1.19798	-0.938252	-1.21609	-0.783667	0.029246
Zm00001eb340900	2252.56	-1.7183	0.311803	-5.51084	3.57115e-08	4.35196e-07	TRUE	0.398291	0.746364	1.72046	-0.949439	-0.918951	-0.70045	-0.296277
Zm00001eb229020	3733.33	-1.71817	0.28406	-6.04862	1.4609e-09	2.25005e-08	TRUE	1.23371	0.238116	0.766557	-1.29713	-1.31855	0.601772	-0.224473
Zm00001eb374560	307.818	-1.71801	0.412483	-4.16505	3.11289e-05	0.000203486	TRUE	-0.047868	0.000604	0.398278	-1.05143	-1.49011	0.85658	1.33395
Zm00001eb410170	2221.9	-1.71793	0.353443	-4.86055	1.17059e-06	1.05494e-05	TRUE	0.945776	0.442446	1.58395	-0.817398	-0.825431	-0.954337	-0.375003
Zm00001eb270370	1856.32	-1.71698	0.40292	-4.26134	2.03207e-05	0.000139525	TRUE	-0.225579	1.09229	1.74163	-0.771283	-0.64075	-0.627689	-0.568614
Zm00001eb041090	238.245	-1.71623	0.490004	-3.50249	0.000460932	0.0021381	TRUE	1.96582	-0.225614	-0.086845	-0.942745	-1.01352	-0.088613	0.391517
Zm00001eb403080	279.986	-1.7156	0.396969	-4.32174	1.54803e-05	0.000109232	TRUE	0.004844	1.23535	1.16782	-1.28888	-1.08581	-0.383635	0.3503
Zm00001eb085150	755.835	-1.71416	0.328095	-5.2246	1.74531e-07	1.86988e-06	TRUE	0.136942	0.856849	-0.019514	-1.4515	-1.21224	1.19339	0.496082
Zm00001eb244720	884.274	-1.71349	0.363099	-4.71908	2.36916e-06	2.0125e-05	TRUE	1.54973	0.093898	0.04066	-1.13833	-1.30686	0.764322	-0.00343
Zm00001eb288060	1004.89	-1.71325	0.378247	-4.52946	5.91339e-06	4.61902e-05	TRUE	-0.274834	0.740755	1.72758	-0.99767	-1.17176	-0.118207	0.094137
Zm00001eb103200	246.378	-1.71237	0.475523	-3.60102	0.000316967	0.00153987	TRUE	0.326208	1.77849	0.742558	-0.501055	-0.871889	-0.938575	-0.535734
Zm00001eb282080	1491.74	-1.71222	0.265799	-6.4418	1.18065e-10	2.13073e-09	TRUE	0.724507	1.15993	0.982471	-1.09326	-1.34675	-0.392807	-0.034093
Zm00001eb044380	5582.85	-1.71194	0.324587	-5.27421	1.3333e-07	1.46839e-06	TRUE	0.343608	0.972666	1.6369	-0.851192	-0.716313	-0.86424	-0.521425
Zm00001eb094460	621.708	-1.71104	0.428902	-3.98934	6.62574e-05	0.000390957	TRUE	2.01878	-0.118379	0.35564	-0.868131	-0.870137	-0.522686	0.004908
Zm00001eb163540	1336.78	-1.70825	0.29183	-5.85356	4.81168e-09	6.74444e-08	TRUE	0.680559	1.07769	1.36792	-0.738665	-0.897602	-0.891581	-0.598319
Zm00001eb331780	1091.46	-1.70444	0.39129	-4.35595	1.32489e-05	9.495e-05	TRUE	0.870102	-0.339813	-0.044406	-1.04077	-1.26226	0.276906	1.54023
Zm00001eb425880	14086.6	-1.70443	0.307697	-5.5393	3.03675e-08	3.74576e-07	TRUE	1.66535	0.001693	0.73927	-1.18039	-1.11519	-0.19129	0.080561
Zm00001eb153500	3469.21	-1.704	0.416298	-4.09321	4.2544e-05	0.000266322	TRUE	1.2962	-0.253711	-0.523153	-1.01663	-1.18993	0.610172	1.07705
Zm00001eb361030	2097.49	-1.70296	0.335537	-5.07532	3.8685e-07	3.85898e-06	TRUE	0.442717	0.927817	1.59294	-0.809272	-0.913042	-0.891579	-0.349584
Zm00001eb281400	708.967	-1.70284	0.37481	-4.5432	5.54065e-06	4.36634e-05	TRUE	0.287831	1.12016	1.53149	-0.644823	-0.992204	-0.836245	-0.466212
Zm00001eb243140	10286.7	-1.70274	0.336892	-5.05424	4.32107e-07	4.25943e-06	TRUE	1.14196	0.633665	1.16134	-1.0863	-0.945568	-0.933141	0.028034
Zm00001eb195060	11924	-1.70267	0.33519	-5.07971	3.78016e-07	3.78417e-06	TRUE	0.429707	0.884134	1.20135	-1.12932	-1.20789	-0.737135	0.559159
Zm00001eb257850	1521.61	-1.70157	0.28818	-5.90456	3.53599e-09	5.08701e-08	TRUE	0.160683	0.83112	1.48341	-1.20784	-1.27304	-0.038404	0.044078
Zm00001eb050130	1110.95	-1.701	0.415559	-4.09329	4.25304e-05	0.000266322	TRUE	-0.320368	1.14061	1.69197	-0.710981	-0.905254	-0.508139	-0.387839
Zm00001eb147460	443.526	-1.70098	0.338007	-5.03237	4.84446e-07	4.72944e-06	TRUE	1.37515	0.010491	0.542598	-1.27128	-1.38916	0.351117	0.381082
Zm00001eb042030	481.913	-1.69982	0.35669	-4.76554	1.88344e-06	1.63105e-05	TRUE	1.70484	0.297909	0.362622	-1.04723	-1.33284	0.004799	0.009902
Zm00001eb152450	19069.8	-1.6982	0.291295	-5.82983	5.54837e-09	7.70849e-08	TRUE	0.917776	0.614677	1.49242	-0.962253	-0.903337	-0.842922	-0.316358
Zm00001eb364960	163.33	-1.6981	0.540713	-3.14048	0.0016867	0.00643168	TRUE	-0.855123	0.705286	1.16053	-1.04097	-1.22004	0.437098	0.813218
Zm00001eb392680	477.264	-1.69761	0.285945	-5.93685	2.90551e-09	4.27982e-08	TRUE	1.05824	0.658628	0.948379	-1.38169	-1.26064	-0.166992	0.144069
Zm00001eb147720	3694.98	-1.69541	0.306987	-5.52274	3.33749e-08	4.08476e-07	TRUE	0.358068	0.856918	1.72277	-0.731114	-0.675531	-0.708366	-0.822742
Zm00001eb353280	1174.95	-1.69507	0.369584	-4.58642	4.50907e-06	3.61771e-05	TRUE	1.96489	0.025557	0.565743	-0.789859	-0.909286	-0.412167	-0.44488
Zm00001eb070220	1107.13	-1.69421	0.391319	-4.3295	1.49451e-05	0.00010584	TRUE	-0.446228	-0.203898	-0.233977	-0.781036	-0.925346	1.95969	0.630797
Zm00001eb338270	1389.93	-1.69415	0.29978	-5.65131	1.5923e-08	2.06272e-07	TRUE	0.368702	0.715943	1.64015	-1.15767	-1.05847	-0.065307	-0.443353
Zm00001eb427140	207.319	-1.69295	0.423751	-3.99516	6.46516e-05	0.000382596	TRUE	1.62869	0.057594	0.537567	-1.02329	-1.40741	0.157108	0.049747
Zm00001eb185220	2940.98	-1.69271	0.350804	-4.82524	1.39834e-06	1.24283e-05	TRUE	0.284485	0.786453	1.7892	-0.78283	-0.638025	-0.867344	-0.571944
Zm00001eb370290	1311.84	-1.69205	0.381656	-4.43343	9.27461e-06	6.90606e-05	TRUE	0.135565	1.30839	0.763196	-1.12916	-1.1546	0.771874	-0.695264
Zm00001eb045670	3033.35	-1.69024	0.35545	-4.75521	1.98243e-06	1.71363e-05	TRUE	1.71561	-0.186829	0.842357	-0.981546	-1.10382	0.068663	-0.354439
Zm00001eb354910	3370.8	-1.69001	0.34715	-4.86824	1.12597e-06	1.01926e-05	TRUE	1.85578	-0.058257	0.629562	-0.920383	-1.10894	-0.185109	-0.212647
Zm00001eb084450	3424.92	-1.6898	0.419433	-4.02878	5.60679e-05	0.000338256	TRUE	2.11505	-0.117682	0.291481	-0.708629	-0.722226	-0.562957	-0.295041
Zm00001eb226240	2164.88	-1.68918	0.319763	-5.28262	1.27351e-07	1.40801e-06	TRUE	1.42502	-0.163551	0.239532	-1.26692	-1.30599	0.533764	0.538142
Zm00001eb259880	1983.27	-1.68788	0.411145	-4.10532	4.03748e-05	0.000254767	TRUE	-0.073524	1.48646	0.339578	-1.19746	-0.992196	0.978778	-0.541633
Zm00001eb187630	2973.45	-1.6874	0.278455	-6.05985	1.36246e-09	2.10758e-08	TRUE	0.493525	0.779337	1.67908	-0.877333	-0.976967	-0.588573	-0.509072
Zm00001eb253220	385.096	-1.68574	0.334556	-5.03873	4.68631e-07	4.59084e-06	TRUE	0.415196	0.928906	1.53879	-1.05564	-1.0582	-0.201478	-0.567572
Zm00001eb120390	957.645	-1.68567	0.290625	-5.80016	6.62517e-09	9.12409e-08	TRUE	0.290036	0.473019	0.814866	-1.27276	-1.58127	0.421717	0.854383
Zm00001eb106990	266.931	-1.68401	0.411858	-4.0888	4.33614e-05	0.000270215	TRUE	0.462221	0.638612	1.74765	-0.879339	-0.881194	-0.241753	-0.846199
Zm00001eb062350	1045.39	-1.68202	0.310584	-5.41566	6.10629e-08	7.15849e-07	TRUE	0.969735	-0.070999	0.117752	-1.24324	-1.43706	0.98321	0.680602
Zm00001eb100550	2803.47	-1.67852	0.323788	-5.18399	2.17185e-07	2.28544e-06	TRUE	-0.014429	0.782056	1.6806	-1.045	-1.18179	-0.269735	0.048307
Zm00001eb424540	450.907	-1.67514	0.463001	-3.61801	0.000296875	0.00145614	TRUE	1.86275	0.566601	0.342641	-0.403895	-0.872048	-0.591395	-0.904649
Zm00001eb234190	1751.63	-1.67508	0.372472	-4.49719	6.88567e-06	5.27963e-05	TRUE	1.51452	0.340411	0.720854	-1.0423	-1.07352	-0.832526	0.372563
Zm00001eb211290	145.732	-1.67496	0.471098	-3.55543	0.000377359	0.00179445	TRUE	0.830134	0.860893	0.442112	-1.00713	-1.67178	-0.18327	0.729049
Zm00001eb203870	995.586	-1.67482	0.439387	-3.81171	0.000138006	0.000744959	TRUE	-0.40392	1.5643	1.33153	-0.745532	-0.710012	-0.418529	-0.617842
Zm00001eb289820	722.869	-1.67409	0.302034	-5.54272	2.97812e-08	3.68948e-07	TRUE	0.992834	0.375463	1.48916	-1.10875	-1.06783	-0.175631	-0.505248
Zm00001eb396640	221.422	-1.67392	0.557205	-3.00414	0.00266332	0.00948144	TRUE	-0.491626	-0.38411	-0.328627	-0.591371	-0.606235	2.17587	0.226099
Zm00001eb023890	503.275	-1.67372	0.373912	-4.47623	7.59711e-06	5.77828e-05	TRUE	-0.101524	0.785737	1.45159	-1.2327	-1.15695	-0.306027	0.559879
Zm00001eb397280	407.823	-1.67277	0.418929	-3.99297	6.5251e-05	0.000385661	TRUE	-0.379396	0.478621	0.255625	-1.08203	-1.10823	1.77745	0.057964
Zm00001eb040740	1410.57	-1.66938	0.34946	-4.77702	1.77909e-06	1.55014e-05	TRUE	-0.499257	0.965201	0.665541	-1.35726	-1.2073	0.874017	0.55906
Zm00001eb029530	2522.01	-1.66766	0.378368	-4.40751	1.04566e-05	7.68531e-05	TRUE	0.979345	-0.05487	1.78115	-0.595298	-0.810919	-0.581918	-0.717487
Zm00001eb117470	1793.09	-1.66755	0.342248	-4.87236	1.10274e-06	1.00015e-05	TRUE	0.628757	0.055336	0.990725	-1.14319	-1.43573	-0.197255	1.10135
Zm00001eb232600	2946.95	-1.66726	0.33522	-4.97362	6.57148e-07	6.25194e-06	TRUE	0.536251	0.657926	1.3235	-1.20234	-1.133	-0.716468	0.534131
Zm00001eb015420	6218.02	-1.66717	0.259068	-6.43527	1.23255e-10	2.21594e-09	TRUE	1.35522	0.653361	1.06423	-0.987702	-0.955343	-0.76174	-0.368023
Zm00001eb158970	2563.87	-1.66497	0.332217	-5.01169	5.39536e-07	5.21698e-06	TRUE	1.03096	0.48006	1.44325	-0.917559	-0.96734	-0.90499	-0.164382
Zm00001eb009580	1216.61	-1.66366	0.415629	-4.00275	6.26094e-05	0.000372844	TRUE	1.35289	-0.163875	-0.18093	-1.10952	-1.06665	-0.143662	1.31175
Zm00001eb421180	787.911	-1.66279	0.397313	-4.18509	2.85056e-05	0.000188345	TRUE	1.93298	0.580587	0.0588	-0.891213	-0.768792	-0.702696	-0.209667
Zm00001eb404400	2847.2	-1.65722	0.329779	-5.02524	5.02793e-07	4.89172e-06	TRUE	1.1321	0.06783	0.02343	-1.17844	-1.36364	0.113708	1.20501
Zm00001eb405320	1104.63	-1.65672	0.330285	-5.01604	5.27487e-07	5.11442e-06	TRUE	1.48449	0.998415	0.101974	-1.16347	-1.07664	-0.501635	0.156871
Zm00001eb291600	1306.96	-1.65644	0.324743	-5.10078	3.38253e-07	3.43213e-06	TRUE	1.70621	0.522421	0.742025	-0.760327	-0.553785	-0.893296	-0.763253
Zm00001eb370170	2546.17	-1.65643	0.272521	-6.07817	1.21559e-09	1.90111e-08	TRUE	0.705175	0.844364	1.53822	-0.789353	-0.845996	-0.848968	-0.603437
Zm00001eb193190	2532.85	-1.65631	0.315571	-5.24861	1.53253e-07	1.6582e-06	TRUE	0.79734	0.367846	1.12129	-1.21287	-1.3048	-0.505442	0.736635
Zm00001eb353800	305.153	-1.65597	0.329043	-5.0327	4.8361e-07	4.72453e-06	TRUE	1.09363	0.492266	1.09254	-1.39471	-1.17336	-0.196469	0.086107
Zm00001eb313720	6137.57	-1.65543	0.310805	-5.32627	1.00253e-07	1.13585e-06	TRUE	-0.205184	1.40467	0.913024	-1.20429	-1.27376	0.258901	0.106633
Zm00001eb211680	200.219	-1.65535	0.362656	-4.56453	5.00615e-06	3.9805e-05	TRUE	1.33979	0.618103	1.10416	-0.986538	-1.01375	-0.391017	-0.670747
Zm00001eb086910	546.675	-1.65506	0.300991	-5.49872	3.82547e-08	4.62612e-07	TRUE	0.99886	0.738543	0.112936	-1.48045	-1.33087	0.382001	0.578976
Zm00001eb401400	531.935	-1.65467	0.300997	-5.49731	3.85636e-08	4.65553e-07	TRUE	1.12727	0.18794	0.394665	-1.36127	-1.44353	0.516479	0.578448
Zm00001eb220880	1090.95	-1.65345	0.457531	-3.61386	0.00030167	0.00147813	TRUE	-0.388207	1.29228	1.60419	-0.702394	-0.574404	-0.505432	-0.726032
Zm00001eb073440	2356.77	-1.65326	0.328249	-5.03662	4.7382e-07	4.63527e-06	TRUE	0.99296	-0.16401	0.647249	-1.17852	-1.44002	1.04717	0.095179
Zm00001eb152600	2032.08	-1.65237	0.289837	-5.70102	1.19094e-08	1.57075e-07	TRUE	0.759889	0.615996	1.6411	-0.605944	-0.63834	-0.931235	-0.841466
Zm00001eb279980	1133.98	-1.65184	0.249487	-6.62096	3.56869e-11	6.99197e-10	TRUE	1.00233	0.496429	1.11704	-1.28961	-1.35545	0.028003	0.001252
Zm00001eb057000	168.506	-1.65181	0.520727	-3.17212	0.00151332	0.00588768	TRUE	-0.154038	1.26776	1.56323	-0.487666	-0.868021	-0.485666	-0.835597
Zm00001eb357950	3248.94	-1.65049	0.355805	-4.63876	3.50509e-06	2.87397e-05	TRUE	0.090795	0.714835	1.90689	-0.630643	-0.658282	-0.721573	-0.702019
Zm00001eb428040	12550.8	-1.64858	0.348266	-4.73368	2.20482e-06	1.88747e-05	TRUE	-0.402774	0.746708	1.288	-1.13375	-1.32627	0.756117	0.071963
Zm00001eb193790	814.569	-1.64839	0.338793	-4.86547	1.14183e-06	1.03165e-05	TRUE	1.47771	0.565849	1.0195	-0.613204	-0.98817	-0.865082	-0.596604
Zm00001eb167580	125.962	-1.64831	0.512687	-3.21504	0.00130426	0.00520274	TRUE	-0.160147	0.924582	1.64536	-0.851783	-1.11805	-0.632263	0.192302
Zm00001eb309580	482.012	-1.64682	0.425901	-3.86668	0.000110327	0.000610605	TRUE	-0.124229	-0.23403	-0.214052	-0.828946	-0.843048	2.11403	0.130275
Zm00001eb386190	1611.15	-1.64589	0.460803	-3.57178	0.000354558	0.00169855	TRUE	-0.542361	0.8566	1.867	-0.922515	-0.677002	-0.353429	-0.228292
Zm00001eb158030	2027.87	-1.64576	0.28004	-5.87689	4.18052e-09	5.94791e-08	TRUE	0.391199	1.03227	1.55344	-0.997777	-0.869649	-0.533715	-0.575769
Zm00001eb396390	229.513	-1.64483	0.532343	-3.0898	0.00200292	0.00746883	TRUE	-0.356866	1.09158	1.49235	-1.3983	-0.657037	0.075825	-0.247556
Zm00001eb028110	2156.33	-1.64468	0.451688	-3.64119	0.000271376	0.00134974	TRUE	1.79659	-0.325511	-0.411198	-0.909481	-1.07916	0.271765	0.656989
Zm00001eb227480	249.533	-1.64306	0.405224	-4.05469	5.02001e-05	0.000306011	TRUE	1.5557	0.618986	0.153367	-1.32099	-1.05583	0.419436	-0.370669
Zm00001eb095750	257.097	-1.64142	0.488776	-3.35822	0.00078446	0.00338842	TRUE	2.05946	-0.292952	0.325295	-0.720093	-0.974613	-0.099163	-0.29793
Zm00001eb321180	694.159	-1.64124	0.399706	-4.10612	4.02354e-05	0.000254001	TRUE	-0.11946	1.13828	1.68846	-0.694371	-0.606468	-0.712297	-0.694143
Zm00001eb305690	953.784	-1.64111	0.41981	-3.90918	9.26116e-05	0.000524849	TRUE	-0.246258	1.0411	1.7675	-0.686978	-0.77818	-0.709808	-0.387383
Zm00001eb064520	154.294	-1.64058	0.399884	-4.10263	4.08477e-05	0.000257408	TRUE	-0.04098	0.205415	0.509221	-1.27551	-1.4058	0.805988	1.20167
Zm00001eb199560	1320.13	-1.64039	0.267239	-6.13828	8.34218e-10	1.31775e-08	TRUE	1.53948	0.731344	0.827157	-0.714498	-0.740191	-0.855845	-0.78745
Zm00001eb179810	1873.18	-1.63924	0.355184	-4.61519	3.92738e-06	3.19437e-05	TRUE	0.521984	1.01285	1.5097	-0.692302	-0.667172	-1.04046	-0.644606
Zm00001eb249680	552.233	-1.63805	0.290407	-5.64055	1.69505e-08	2.18386e-07	TRUE	0.946084	0.816569	1.25503	-1.21076	-1.00955	-0.571922	-0.225448
Zm00001eb358460	685.039	-1.63763	0.281924	-5.80874	6.2943e-09	8.68528e-08	TRUE	1.43714	0.634798	1.04612	-0.790955	-0.801748	-0.71005	-0.815303
Zm00001eb285090	5466.47	-1.63693	0.309847	-5.28302	1.27071e-07	1.40601e-06	TRUE	1.2386	0.555634	1.07302	-1.2721	-0.939371	-0.708736	0.05296
Zm00001eb051460	495.902	-1.63675	0.460864	-3.55148	0.000383071	0.00181917	TRUE	-0.39622	0.882124	1.63791	-0.911889	-0.9911	-0.631909	0.411083
Zm00001eb376100	2717.99	-1.63603	0.374094	-4.37332	1.22372e-05	8.83833e-05	TRUE	1.80281	-0.027253	0.228322	-1.15382	-0.994336	-0.356005	0.500281
Zm00001eb122120	241.837	-1.63543	0.437102	-3.74152	0.00018291	0.00095144	TRUE	2.00306	0.279077	0.250336	-0.845015	-0.829635	-0.62502	-0.232804
Zm00001eb158850	1350.26	-1.63424	0.314038	-5.20395	1.95093e-07	2.06677e-06	TRUE	0.364094	1.32754	1.30332	-0.575477	-0.52251	-0.987285	-0.909678
Zm00001eb332710	1768.33	-1.63325	0.367232	-4.44748	8.68842e-06	6.52091e-05	TRUE	-0.056793	0.943522	1.60488	-1.08409	-0.95461	-0.639861	0.186952
Zm00001eb025150	738.377	-1.63171	0.362186	-4.50517	6.63184e-06	5.1071e-05	TRUE	0.26177	-0.428819	-0.312883	-0.960773	-1.12401	0.987118	1.5776
Zm00001eb289800	4286.91	-1.63073	0.280086	-5.82225	5.80617e-09	8.02734e-08	TRUE	0.283328	1.00045	1.51399	-1.09398	-1.07933	-0.125229	-0.499232
Zm00001eb338730	1575.14	-1.63024	0.444979	-3.66364	0.000248654	0.0012521	TRUE	-0.328149	2.07663	0.440053	-0.64816	-0.829511	-0.24268	-0.46818
Zm00001eb190330	3660.32	-1.62958	0.282577	-5.76684	8.07707e-09	1.08997e-07	TRUE	0.843207	0.606657	1.60142	-0.677336	-0.840547	-0.678787	-0.854616
Zm00001eb190250	634.742	-1.62805	0.422919	-3.84956	0.00011833	0.000650584	TRUE	-0.195387	-0.079385	0.938556	-1.00816	-1.18307	1.62745	-0.100002
Zm00001eb327030	2234.89	-1.62748	0.326512	-4.98443	6.21432e-07	5.96012e-06	TRUE	0.605375	1.04968	1.4251	-0.86795	-0.476564	-0.783889	-0.951757
Zm00001eb404010	704.115	-1.62654	0.478477	-3.39941	0.000675317	0.00298702	TRUE	0.845813	-0.564006	-0.636117	-1.00736	-0.942318	1.10235	1.20164
Zm00001eb192710	1077.13	-1.62621	0.32204	-5.04972	4.42447e-07	4.35237e-06	TRUE	1.58086	0.155107	1.07864	-1.08928	-0.870313	-0.471576	-0.383425
Zm00001eb106580	495.076	-1.62567	0.345635	-4.70344	2.55815e-06	2.1574e-05	TRUE	0.903072	0.13767	0.257671	-1.19771	-1.48939	1.18531	0.203381
Zm00001eb127190	518.697	-1.62521	0.306058	-5.31013	1.09546e-07	1.23523e-06	TRUE	1.44067	0.85754	0.683719	-1.0594	-1.06	-0.659012	-0.203514
Zm00001eb231170	2163.24	-1.62514	0.292719	-5.55188	2.82614e-08	3.51656e-07	TRUE	1.58635	0.31139	1.06434	-0.811353	-0.89173	-0.691533	-0.567464
Zm00001eb237900	540.763	-1.6248	0.295619	-5.49627	3.87912e-08	4.67903e-07	TRUE	0.514634	1.14489	1.38113	-0.986751	-0.968738	-0.631866	-0.453297
Zm00001eb316630	2460.88	-1.62348	0.275778	-5.88692	3.93465e-09	5.62064e-08	TRUE	1.15828	0.116333	1.13397	-1.32452	-1.24208	-0.078095	0.236119
Zm00001eb178500	903.58	-1.62343	0.270802	-5.99489	2.03629e-09	3.05983e-08	TRUE	1.13578	0.499706	0.529639	-1.29472	-1.51459	0.353683	0.290508
Zm00001eb327250	798.708	-1.62084	0.410351	-3.94989	7.81883e-05	0.000451772	TRUE	-0.643857	-0.299483	0.642248	-1.06462	-1.02498	1.3395	1.0512
Zm00001eb143150	185.427	-1.62016	0.393184	-4.12061	3.77867e-05	0.000240901	TRUE	0.524192	0.601123	-0.059481	-1.25536	-1.47419	1.16892	0.494792
Zm00001eb423990	640.527	-1.61979	0.328281	-4.93414	8.05053e-07	7.49323e-06	TRUE	1.21512	0.93662	0.975372	-0.703384	-1.17089	-0.775297	-0.477541
Zm00001eb006870	4205.06	-1.61843	0.336152	-4.81459	1.47503e-06	1.30526e-05	TRUE	0.03257	0.97213	1.76435	-0.76301	-0.763451	-0.665492	-0.5771
Zm00001eb369790	726.477	-1.61799	0.461526	-3.50574	0.000455336	0.00211491	TRUE	-0.397455	0.904309	1.76446	-0.791617	-0.886508	-0.698116	0.104925
Zm00001eb345770	272.292	-1.61741	0.406044	-3.98335	6.79511e-05	0.000399953	TRUE	-0.011569	1.26957	1.53575	-0.72423	-0.916253	-0.560999	-0.592269
Zm00001eb136170	306.047	-1.61702	0.332818	-4.85858	1.18233e-06	1.06417e-05	TRUE	0.5428	1.03703	0.892638	-1.18179	-1.54649	0.205862	0.04996
Zm00001eb275740	2389.66	-1.61674	0.37679	-4.29083	1.78007e-05	0.000124202	TRUE	-0.095447	0.922353	1.83003	-0.620403	-0.796525	-0.581509	-0.658502
Zm00001eb147610	659.224	-1.61466	0.299085	-5.39867	6.71379e-08	7.81256e-07	TRUE	0.3634	0.741211	1.10397	-1.22775	-1.53815	0.467329	0.089991
Zm00001eb367740	859.943	-1.61384	0.26671	-6.05091	1.44029e-09	2.2207e-08	TRUE	0.872877	1.21145	0.997887	-1.02296	-1.08581	-0.68098	-0.292455
Zm00001eb235930	923.211	-1.61274	0.259156	-6.22303	4.87634e-10	8.06188e-09	TRUE	1.00113	0.843261	0.965384	-1.16832	-1.37802	0.035724	-0.299161
Zm00001eb334290	5203.97	-1.61272	0.286321	-5.63256	1.77555e-08	2.27654e-07	TRUE	1.50659	0.658914	0.898354	-0.953739	-0.793688	-0.861861	-0.454565
Zm00001eb395970	226.556	-1.61235	0.378505	-4.25979	2.04617e-05	0.000140217	TRUE	1.19868	0.993653	0.87261	-1.07642	-0.936951	-0.190444	-0.861131
Zm00001eb145960	1103.97	-1.61037	0.490236	-3.28488	0.00102024	0.00422153	TRUE	-0.328944	1.15891	1.69228	-0.629321	-0.525568	-0.486411	-0.880942
Zm00001eb411540	516.069	-1.60879	0.291648	-5.5162	3.46407e-08	4.23238e-07	TRUE	0.711769	0.060241	0.212625	-1.36073	-1.4106	0.83416	0.952539
Zm00001eb023830	205.739	-1.60772	0.473555	-3.395	0.000686274	0.00302605	TRUE	0.424812	-0.204145	0.035881	-0.944079	-1.18338	1.86679	0.004121
Zm00001eb063880	5361.01	-1.60679	0.402098	-3.996	6.44211e-05	0.000381539	TRUE	-0.35608	0.849281	1.85427	-0.867333	-0.812849	-0.531129	-0.136156
Zm00001eb157720	577.929	-1.60594	0.297886	-5.39113	7.00156e-08	8.12078e-07	TRUE	0.785068	1.54134	0.761409	-0.948125	-0.751863	-0.715134	-0.672699
Zm00001eb000330	1041.79	-1.60469	0.324028	-4.95231	7.33376e-07	6.90638e-06	TRUE	1.35677	0.430727	1.03766	-0.990242	-1.18026	-0.720419	0.065763
Zm00001eb176120	573.502	-1.60417	0.328482	-4.88358	1.04178e-06	9.49113e-06	TRUE	-0.035865	1.0553	1.37227	-1.24019	-1.20895	0.046662	0.010771
Zm00001eb056930	30442	-1.60375	0.378605	-4.23594	2.27597e-05	0.000154398	TRUE	-0.247777	0.47912	1.88505	-1.00895	-0.956823	-0.39996	0.249331
Zm00001eb316120	406.116	-1.60362	0.501416	-3.19819	0.00138291	0.00545664	TRUE	-0.522994	-0.218142	-0.318899	-0.645734	-0.730114	2.12909	0.30679
Zm00001eb074520	380.628	-1.60336	0.344966	-4.64788	3.35356e-06	2.7593e-05	TRUE	1.52868	0.345824	1.1269	-0.874902	-0.684993	-0.721827	-0.719682
Zm00001eb274760	340.623	-1.60326	0.390939	-4.10105	4.11275e-05	0.000258711	TRUE	-0.183631	0.870022	1.51673	-1.34832	-1.03635	0.076442	0.105114
Zm00001eb244640	595.864	-1.60319	0.419127	-3.82506	0.000130742	0.000711655	TRUE	-0.228413	1.17691	1.51901	-0.842226	-1.03525	0.092385	-0.682421
Zm00001eb136890	2825.9	-1.6022	0.35183	-4.5539	5.26595e-06	4.17072e-05	TRUE	-0.425857	0.688581	1.31258	-1.15767	-1.29274	0.100382	0.774719
Zm00001eb202950	753.013	-1.60182	0.316933	-5.05411	4.32399e-07	4.25943e-06	TRUE	0.199977	1.3965	1.26329	-0.925671	-1.0862	-0.518071	-0.329828
Zm00001eb066180	190.708	-1.60166	0.434764	-3.68397	0.000229625	0.00116394	TRUE	1.03592	0.017978	-0.319471	-1.20843	-1.24571	0.451407	1.26831
Zm00001eb220900	142.661	-1.60062	0.430193	-3.7207	0.000198671	0.00102255	TRUE	1.20009	1.08036	0.809411	-0.688235	-1.27184	-0.628252	-0.501532
Zm00001eb026350	2813.92	-1.60002	0.270606	-5.91273	3.36482e-09	4.85554e-08	TRUE	0.340206	1.07382	1.48952	-1.09509	-0.98551	-0.370006	-0.45294
Zm00001eb061140	189.716	-1.59998	0.427395	-3.74357	0.000181427	0.00094442	TRUE	1.18139	0.840001	0.789761	-1.13423	-1.0651	-0.883374	0.271554
Zm00001eb341310	376.265	-1.59964	0.443906	-3.60355	0.000313904	0.001527	TRUE	1.88252	-0.137762	0.131302	-0.923404	-1.09833	-0.345661	0.491339
Zm00001eb197300	196.004	-1.59904	0.407018	-3.92867	8.54162e-05	0.000488166	TRUE	0.799945	1.19691	0.179842	-1.21287	-1.33729	0.718724	-0.345258
Zm00001eb005360	269.367	-1.59788	0.414079	-3.85888	0.000113908	0.000628467	TRUE	-0.02478	1.49209	1.32004	-0.896522	-0.71176	-0.701524	-0.477546
Zm00001eb245850	1544.58	-1.59786	0.507354	-3.14939	0.00163611	0.00626459	TRUE	-0.614178	1.02289	1.82175	-0.574847	-0.644738	-0.487539	-0.523339
Zm00001eb284390	1772.91	-1.59726	0.441079	-3.62125	0.000293179	0.001441	TRUE	-0.405496	1.18141	1.68519	-0.808348	-0.594707	-0.657692	-0.400365
Zm00001eb114280	3430.17	-1.59612	0.306978	-5.19946	1.99867e-07	2.1121e-06	TRUE	0.120178	0.993951	1.67065	-0.888934	-1.00956	-0.396382	-0.489909
Zm00001eb295550	249.924	-1.59583	0.339733	-4.6973	2.63618e-06	2.22056e-05	TRUE	0.98047	0.377184	0.82011	-1.37278	-1.42189	0.056222	0.560685
Zm00001eb293360	1483.99	-1.59545	0.290502	-5.49205	3.97299e-08	4.78818e-07	TRUE	1.43293	0.13713	0.330658	-1.30801	-1.34907	0.40694	0.349416
Zm00001eb013140	1485.67	-1.59416	0.389461	-4.09324	4.25386e-05	0.000266322	TRUE	1.94525	-0.228277	0.319103	-0.989215	-0.987943	-0.259386	0.200463
Zm00001eb167290	291.64	-1.59405	0.426201	-3.74013	0.000183924	0.000956364	TRUE	0.269671	0.05501	0.978234	-1.03257	-1.4955	1.28862	-0.063465
Zm00001eb231160	266.442	-1.59392	0.43684	-3.64875	0.000263517	0.00131499	TRUE	-0.188816	1.33171	1.18444	-1.27754	-0.911835	0.327839	-0.465794
Zm00001eb169080	323.168	-1.59312	0.330001	-4.82761	1.38181e-06	1.22967e-05	TRUE	1.43317	0.518862	1.13503	-0.740859	-0.760016	-0.838047	-0.748134
Zm00001eb052700	311.221	-1.59182	0.425275	-3.74303	0.000181812	0.000946078	TRUE	0.209949	0.407539	0.640814	-1.03898	-1.42463	1.48122	-0.275907
Zm00001eb253280	109.468	-1.59108	0.515958	-3.08375	0.00204411	0.0075925	TRUE	0.643103	0.650668	1.6569	-0.942248	-0.594188	-0.409794	-1.00444
Zm00001eb245940	332.862	-1.59074	0.35349	-4.50009	6.79247e-06	5.22229e-05	TRUE	0.821891	0.43602	1.62533	-1.00549	-0.990368	-0.675131	-0.212253
Zm00001eb396450	1136.68	-1.5903	0.416771	-3.81578	0.000135756	0.0007336	TRUE	-0.040804	0.908923	1.81082	-0.701882	-0.633774	-0.89144	-0.451841
Zm00001eb178250	8440.46	-1.59019	0.294166	-5.40578	6.45279e-08	7.52119e-07	TRUE	0.46692	0.771516	1.68978	-0.936843	-0.854833	-0.764652	-0.371885
Zm00001eb162890	910.655	-1.58956	0.321041	-4.95127	7.37301e-07	6.93542e-06	TRUE	1.5049	0.388284	0.80555	-1.12246	-1.12502	-0.618188	0.166929
Zm00001eb049240	4750.57	-1.58899	0.25199	-6.30575	2.86801e-10	4.91932e-09	TRUE	1.17247	1.01937	0.90307	-1.00422	-1.04122	-0.777112	-0.272354
Zm00001eb249610	84.2544	-1.58872	0.512025	-3.10281	0.00191691	0.00718398	TRUE	1.92708	0.461238	0.374746	-0.66932	-0.802644	-0.584344	-0.706755
Zm00001eb207120	580.837	-1.58839	0.314169	-5.05583	4.28515e-07	4.22998e-06	TRUE	0.147119	0.926871	0.776859	-1.54673	-1.24174	0.73517	0.202452
Zm00001eb312420	150.523	-1.58625	0.371801	-4.26641	1.98646e-05	0.000136853	TRUE	1.18793	1.00056	0.95509	-1.03591	-0.987063	-0.550181	-0.570433
Zm00001eb120900	911.123	-1.5862	0.335421	-4.72899	2.25641e-06	1.92814e-05	TRUE	-0.400999	0.439245	0.75445	-1.18386	-1.41334	1.06022	0.744279
Zm00001eb135860	178.208	-1.58484	0.408793	-3.87688	0.000105805	0.000589725	TRUE	0.353641	0.356394	1.51168	-1.14881	-1.38396	-0.143828	0.454889
Zm00001eb255240	11929.5	-1.58368	0.401638	-3.94306	8.04491e-05	0.000463514	TRUE	-0.112885	0.747945	1.92483	-0.680094	-0.671342	-0.803573	-0.404876
Zm00001eb234150	177.622	-1.58341	0.442259	-3.58027	0.000343238	0.00165045	TRUE	1.53633	0.52487	0.957618	-1.0176	-0.494997	-0.880128	-0.626097
Zm00001eb297310	2019.33	-1.58233	0.419778	-3.76944	0.000163617	0.000863755	TRUE	1.95104	-0.165825	-0.268127	-0.902279	-1.08122	0.200555	0.265851
Zm00001eb394380	1283.13	-1.58171	0.312115	-5.0677	4.02654e-07	3.99415e-06	TRUE	0.923257	0.442899	1.56903	-1.18555	-0.789123	-0.476487	-0.484038
Zm00001eb260970	5154.69	-1.5817	0.468799	-3.37394	0.000741007	0.00322924	TRUE	1.8661	-0.431765	-0.43604	-0.845336	-1.02347	0.427406	0.443108
Zm00001eb043070	6366.89	-1.58077	0.297352	-5.31614	1.05993e-07	1.19802e-06	TRUE	0.99532	-0.11281	0.478241	-1.20295	-1.52753	0.527693	0.842031
Zm00001eb136490	26176	-1.5802	0.259729	-6.08404	1.17194e-09	1.83691e-08	TRUE	0.907579	0.010252	0.742095	-1.30813	-1.4776	0.342395	0.783414
Zm00001eb021510	459.389	-1.57851	0.361919	-4.3615	1.29174e-05	9.28703e-05	TRUE	1.69516	0.020744	0.320381	-1.12049	-1.30063	0.225431	0.159406
Zm00001eb238250	641.338	-1.57835	0.438945	-3.59578	0.000323424	0.00156767	TRUE	-0.62834	0.804666	1.70462	-0.982571	-1.02999	-0.026369	0.15798
Zm00001eb197120	280.763	-1.57767	0.37443	-4.21352	2.51424e-05	0.000168467	TRUE	1.46859	0.4998	1.08395	-0.906415	-0.674342	-0.908131	-0.563449
Zm00001eb033580	564.997	-1.57737	0.336976	-4.68095	2.85547e-06	2.38685e-05	TRUE	0.158946	1.04026	1.65005	-0.934793	-0.860514	-0.517069	-0.536882
Zm00001eb043390	2199.17	-1.57532	0.409363	-3.84822	0.000118979	0.000653396	TRUE	-0.595736	0.683263	1.72878	-1.05691	-1.00056	0.266021	-0.024863
Zm00001eb311180	839.836	-1.5734	0.411452	-3.82403	0.000131289	0.00071354	TRUE	-0.083816	0.381233	0.34759	-1.02373	-1.115	1.82389	-0.330169
Zm00001eb143260	560.748	-1.57297	0.396045	-3.9717	7.13624e-05	0.000417089	TRUE	-0.511016	1.15473	1.23188	-1.10158	-1.22698	0.408662	0.044304
Zm00001eb005330	5180.97	-1.57248	0.326736	-4.81269	1.48916e-06	1.3153e-05	TRUE	0.195162	0.820808	1.80834	-0.835368	-0.63109	-0.685373	-0.672482
Zm00001eb189150	2556.14	-1.57244	0.390673	-4.02496	5.69848e-05	0.000343094	TRUE	0.031921	1.00244	1.67679	-0.672308	-0.974837	-0.204809	-0.859195
Zm00001eb002550	468.006	-1.57068	0.286484	-5.48259	4.19141e-08	5.03005e-07	TRUE	0.681124	0.602411	1.02851	-1.3075	-1.50516	0.163767	0.336842
Zm00001eb191710	3330.39	-1.56975	0.320877	-4.89206	9.97875e-07	9.13806e-06	TRUE	0.215851	0.60065	1.85793	-0.860202	-1.03369	-0.50781	-0.272731
Zm00001eb369350	1496.65	-1.56883	0.460845	-3.40425	0.000663458	0.00294007	TRUE	-0.320547	2.04749	0.537154	-0.565499	-0.7622	-0.27155	-0.664848
Zm00001eb103610	2857.33	-1.56663	0.303529	-5.16137	2.45144e-07	2.55313e-06	TRUE	0.464708	0.575262	1.7638	-0.99072	-0.94261	-0.651176	-0.21926
Zm00001eb415650	737.206	-1.56633	0.288538	-5.4285	5.68304e-08	6.68441e-07	TRUE	0.564452	0.840042	1.32938	-1.10196	-1.38353	-0.280958	0.03258
Zm00001eb019090	321.03	-1.56616	0.376882	-4.15557	3.24478e-05	0.000210747	TRUE	0.64948	0.988429	1.00779	-1.35638	-1.0457	0.436138	-0.679747
Zm00001eb353080	4571.82	-1.56541	0.34886	-4.48723	7.21558e-06	5.50581e-05	TRUE	0.338864	-0.419246	-0.470408	-0.99778	-0.975922	0.841772	1.68272
Zm00001eb075910	290.721	-1.56423	0.380405	-4.11201	3.92235e-05	0.000248608	TRUE	0.313005	0.510159	1.63817	-0.982659	-1.3993	0.085484	-0.164859
Zm00001eb346300	3325.68	-1.56388	0.316725	-4.93765	7.90703e-07	7.38875e-06	TRUE	0.078896	1.20656	1.56556	-0.759388	-0.883136	-0.613958	-0.594532
Zm00001eb375550	3940.03	-1.56121	0.302626	-5.15889	2.48422e-07	2.58347e-06	TRUE	0.26316	0.877182	1.75092	-0.747042	-0.771277	-0.695117	-0.677826
Zm00001eb372830	261001	-1.56106	0.372975	-4.18544	2.8462e-05	0.000188221	TRUE	-0.197157	0.105897	1.38177	-1.08199	-1.17917	-0.224736	1.19539
Zm00001eb357050	1766.04	-1.5609	0.324818	-4.80545	1.54404e-06	1.36123e-05	TRUE	1.80088	0.409051	0.660854	-0.731665	-0.878558	-0.790122	-0.470435
Zm00001eb294720	829.075	-1.55997	0.344337	-4.53035	5.88847e-06	4.60463e-05	TRUE	0.048409	1.03516	1.63202	-1.00639	-0.923172	-0.6035	-0.182532
Zm00001eb055960	444.024	-1.55878	0.302954	-5.14527	2.67132e-07	2.76186e-06	TRUE	0.966176	0.478335	0.867922	-1.25747	-1.5148	0.003166	0.456671
Zm00001eb011640	2486.6	-1.55869	0.331991	-4.69498	2.66638e-06	2.24201e-05	TRUE	0.265332	0.787477	1.7884	-0.954123	-0.651312	-0.537385	-0.698393
Zm00001eb279490	2979.45	-1.55741	0.295645	-5.26784	1.38037e-07	1.51133e-06	TRUE	0.528354	0.92018	1.58235	-0.783293	-0.81585	-0.897752	-0.533993
Zm00001eb183750	1145.4	-1.55686	0.28013	-5.55761	2.73487e-08	3.41798e-07	TRUE	1.37014	0.255434	1.11743	-1.12591	-1.20694	-0.19226	-0.217893
Zm00001eb428340	302.507	-1.55619	0.367472	-4.23487	2.28683e-05	0.000155061	TRUE	1.18062	0.396138	1.32048	-1.18474	-0.896361	-0.695662	-0.12047
Zm00001eb281280	2834.81	-1.55608	0.356756	-4.36176	1.29022e-05	9.28079e-05	TRUE	1.53177	0.103129	0.585875	-1.07163	-1.16992	-0.615101	0.635883
Zm00001eb193280	1976.46	-1.55585	0.467509	-3.32795	0.000874886	0.00370705	TRUE	-0.434499	1.23524	1.64912	-0.677074	-0.542157	-0.447688	-0.782944
Zm00001eb337510	1000.04	-1.55563	0.317836	-4.89446	9.85767e-07	9.05641e-06	TRUE	1.4549	0.217375	1.22829	-0.884665	-0.961131	-0.707163	-0.347607
Zm00001eb094410	93.6429	-1.55415	0.502779	-3.09113	0.00199396	0.00744323	TRUE	-0.386536	0.029436	0.116907	-1.00195	-1.19563	1.68323	0.754548
Zm00001eb010020	700.337	-1.55413	0.309616	-5.01953	5.17974e-07	5.02907e-06	TRUE	0.583104	1.04202	1.23982	-1.15974	-1.10218	-0.685833	0.082817
Zm00001eb184830	1519.37	-1.55398	0.457062	-3.39995	0.00067399	0.00298464	TRUE	-0.321927	0.243261	1.08929	-1.04614	-0.949486	1.53404	-0.549034
Zm00001eb401770	572.564	-1.55368	0.320694	-4.84474	1.26775e-06	1.13458e-05	TRUE	0.331826	0.585648	0.934724	-1.18336	-1.66493	0.449249	0.546843
Zm00001eb299950	491.989	-1.55314	0.49314	-3.14948	0.0016356	0.00626459	TRUE	-0.45714	1.02292	1.81404	-0.68864	-0.539399	-0.688706	-0.463073
Zm00001eb049310	661.801	-1.55265	0.367225	-4.22806	2.35715e-05	0.000159144	TRUE	-0.203112	0.584776	1.71547	-1.22215	-1.05811	-0.056596	0.239724
Zm00001eb421710	403.042	-1.55253	0.485143	-3.20016	0.00137351	0.00542256	TRUE	-0.125298	2.09065	0.393967	-0.54779	-0.619408	-0.41726	-0.774864
Zm00001eb054960	6501.05	-1.55204	0.296264	-5.23871	1.61699e-07	1.7419e-06	TRUE	0.161133	0.810231	1.75035	-1.00145	-0.988218	-0.3093	-0.422741
Zm00001eb184840	3685.87	-1.55196	0.279685	-5.54895	2.87388e-08	3.56658e-07	TRUE	0.983966	0.149421	0.910681	-1.3208	-1.34609	-0.152128	0.774945
Zm00001eb187890	518.596	-1.55179	0.400472	-3.8749	0.000106669	0.000593138	TRUE	-0.505071	0.620329	1.39591	-1.25537	-1.1224	0.116854	0.74975
Zm00001eb109560	278.417	-1.55065	0.390135	-3.97465	7.04832e-05	0.000412461	TRUE	1.77342	-0.037977	0.688901	-1.04463	-1.11978	-0.12832	-0.131615
Zm00001eb258130	903.397	-1.55009	0.395676	-3.91758	8.94424e-05	0.000508513	TRUE	-0.217839	0.873634	1.86462	-0.751059	-0.827417	-0.571381	-0.370559
Zm00001eb099580	7300.21	-1.54926	0.399997	-3.87319	0.000107421	0.000596854	TRUE	1.91614	-0.214007	0.331258	-0.891351	-0.994108	-0.509383	0.361452
Zm00001eb200170	1079.53	-1.54913	0.424539	-3.64897	0.000263293	0.00131499	TRUE	2.00934	-0.220861	0.302443	-0.885884	-0.857365	-0.521679	0.174003
Zm00001eb150410	2841.59	-1.54906	0.304976	-5.07929	3.78843e-07	3.78976e-06	TRUE	1.43802	0.245846	0.798857	-1.09823	-1.30155	-0.447619	0.364683
Zm00001eb124560	4613.72	-1.54825	0.453305	-3.41547	0.000636711	0.0028366	TRUE	-0.308682	0.678522	1.93666	-0.718661	-0.728961	-0.80158	-0.057298
Zm00001eb241110	981.046	-1.54738	0.310989	-4.97568	6.50174e-07	6.18975e-06	TRUE	0.4422	0.139066	1.47736	-1.34949	-1.22377	-0.017801	0.532433
Zm00001eb252570	2093.97	-1.54646	0.327294	-4.72499	2.30128e-06	1.95941e-05	TRUE	1.31619	0.323971	0.567408	-1.22991	-1.20991	-0.530877	0.763119
Zm00001eb278530	800.767	-1.54627	0.292177	-5.29223	1.20833e-07	1.34644e-06	TRUE	1.19328	0.701442	1.04758	-1.03084	-1.22531	-0.649019	-0.037141
Zm00001eb060010	1915.93	-1.54555	0.326205	-4.73797	2.15865e-06	1.8513e-05	TRUE	0.317409	0.766638	0.832771	-1.09348	-1.73318	0.407486	0.502354
Zm00001eb386260	130.382	-1.54484	0.42635	-3.62341	0.000290748	0.00143054	TRUE	1.02045	0.373505	0.090642	-1.25683	-1.52773	0.811902	0.488064
Zm00001eb399480	298.542	-1.54482	0.495956	-3.11483	0.00184054	0.00693809	TRUE	2.06635	0.03018	-0.34063	-0.791355	-0.91233	0.250771	-0.302981
Zm00001eb181990	929.186	-1.54409	0.286205	-5.39504	6.85087e-08	7.95902e-07	TRUE	0.057575	1.13218	0.931722	-1.40338	-1.30416	0.341534	0.244525
Zm00001eb398580	683.272	-1.54302	0.320539	-4.81381	1.48077e-06	1.30952e-05	TRUE	0.862995	0.630086	1.54854	-0.681501	-1.08415	-0.581447	-0.694523
Zm00001eb220220	434.397	-1.54259	0.360564	-4.27826	1.88358e-05	0.000130462	TRUE	1.39208	0.205194	0.950239	-1.07216	-1.23489	-0.57501	0.334554
Zm00001eb279830	757.741	-1.54236	0.342767	-4.49972	6.80429e-06	5.22854e-05	TRUE	0.426237	0.659252	1.60244	-0.901248	-1.30821	0.058893	-0.537358
Zm00001eb045960	801.583	-1.54198	0.461341	-3.3424	0.000830579	0.00354872	TRUE	0.187812	0.415652	1.99297	-0.438685	-0.665473	-0.557359	-0.934919
Zm00001eb184410	2632.93	-1.54177	0.427263	-3.60847	0.000308004	0.00150294	TRUE	2.03566	-0.205862	-0.196255	-0.821491	-1.02715	0.212849	0.002252
Zm00001eb390310	185.302	-1.54126	0.372444	-4.13823	3.49995e-05	0.000225054	TRUE	0.374254	1.18494	1.15962	-1.13609	-1.33225	-0.209403	-0.041076
Zm00001eb357650	1729.11	-1.54089	0.426953	-3.60905	0.000307325	0.00150065	TRUE	-0.382801	0.850602	1.89539	-0.642005	-0.84814	-0.547886	-0.325164
Zm00001eb252240	1641.97	-1.54067	0.373004	-4.13045	3.62048e-05	0.000231963	TRUE	0.368945	0.911567	1.37058	-1.01905	-1.05296	-0.937453	0.358375
Zm00001eb370430	352.983	-1.54051	0.369828	-4.16548	3.107e-05	0.000203194	TRUE	0.028364	0.748176	1.04104	-1.35552	-1.2263	0.983117	-0.218879
Zm00001eb061350	822.215	-1.53994	0.348929	-4.41332	1.01799e-05	7.49747e-05	TRUE	1.28579	0.734562	1.09749	-0.640714	-0.563943	-0.808279	-1.10491
Zm00001eb329520	1470.61	-1.53865	0.392363	-3.92149	8.80033e-05	0.000501538	TRUE	0.364349	0.700185	1.78873	-0.577457	-0.753391	-0.518819	-1.0036
Zm00001eb326720	2849.63	-1.53822	0.350209	-4.3923	1.12159e-05	8.17565e-05	TRUE	1.46873	0.174072	0.382939	-1.22798	-1.10632	-0.511461	0.820021
Zm00001eb098340	988.914	-1.53797	0.294644	-5.21975	1.79163e-07	1.91516e-06	TRUE	0.286561	0.837309	1.3515	-1.26325	-1.25193	0.35629	-0.31648
Zm00001eb203150	240.314	-1.53791	0.375839	-4.09193	4.27797e-05	0.000267562	TRUE	0.189986	1.0036	0.319356	-1.29129	-1.39379	1.11411	0.058027
Zm00001eb178470	1511.88	-1.53781	0.422847	-3.6368	0.000276044	0.00136745	TRUE	1.96372	-0.147817	-0.012592	-0.830624	-1.06877	-0.329427	0.425515
Zm00001eb156280	361.651	-1.53711	0.45345	-3.38981	0.000699401	0.00307723	TRUE	1.13949	-0.294772	-0.434663	-1.02694	-1.10438	0.281806	1.43946
Zm00001eb024740	2484.57	-1.53613	0.39832	-3.85653	0.000115008	0.000634041	TRUE	-0.275655	1.31085	1.45248	-0.838695	-0.916859	-0.742842	0.010715
Zm00001eb330210	994.689	-1.53592	0.340247	-4.51412	6.35816e-06	4.92575e-05	TRUE	0.16041	0.848395	1.65837	-0.96106	-1.08099	-0.641753	0.016621
Zm00001eb387590	658.911	-1.53568	0.32869	-4.67213	2.98099e-06	2.48008e-05	TRUE	-0.00288	0.482597	1.44599	-1.17942	-1.43119	0.376594	0.308313
Zm00001eb287600	1532.44	-1.53558	0.313516	-4.89795	9.68424e-07	8.90862e-06	TRUE	1.72575	0.311161	0.877421	-0.806768	-0.738836	-0.580399	-0.788332
Zm00001eb419950	5152.54	-1.53302	0.374554	-4.09292	4.25972e-05	0.000266538	TRUE	0.138665	0.668434	1.74542	-1.05518	-0.832384	-0.812134	0.147177
Zm00001eb037520	2158.5	-1.53148	0.424107	-3.61107	0.000304942	0.00149159	TRUE	-0.276497	1.14261	0.914303	-1.06896	-1.02817	1.03359	-0.716888
Zm00001eb331190	958.15	-1.53108	0.386549	-3.9609	7.46662e-05	0.000434074	TRUE	1.92371	-0.18139	0.41713	-0.918951	-1.059	-0.325309	0.14381
Zm00001eb100540	290.789	-1.53104	0.412847	-3.70848	0.000208505	0.00106929	TRUE	0.241763	0.477344	1.97014	-0.580509	-0.787892	-0.627591	-0.693256
Zm00001eb200510	653.685	-1.53017	0.323268	-4.73345	2.20737e-06	1.88852e-05	TRUE	1.33803	0.468201	1.25755	-0.789467	-0.748862	-0.58743	-0.938026
Zm00001eb011810	178.1	-1.53011	0.466352	-3.28101	0.00103437	0.00426155	TRUE	1.61161	-0.166255	1.11429	-0.771145	-1.05601	-0.644953	-0.087531
Zm00001eb152180	613.602	-1.52966	0.343618	-4.45163	8.52215e-06	6.40969e-05	TRUE	1.37598	0.670106	0.315748	-1.07636	-1.39411	-0.420002	0.528637
Zm00001eb059310	1794.24	-1.52713	0.414073	-3.68807	0.00022596	0.00114812	TRUE	0.026408	0.620887	1.84707	-0.835926	-0.845537	-0.884997	0.072092
Zm00001eb256020	46366.3	-1.52667	0.384992	-3.96544	7.32597e-05	0.000426784	TRUE	1.85522	-0.308461	0.006643	-1.12354	-0.97565	0.049536	0.496255
Zm00001eb093870	246.6	-1.52635	0.484175	-3.15247	0.00161897	0.00621349	TRUE	-0.372783	0.187309	0.341582	-0.864603	-1.18702	1.88484	0.01068
Zm00001eb178540	1431.05	-1.52588	0.230782	-6.61177	3.79754e-11	7.37925e-10	TRUE	-0.019146	0.165973	0.092252	-1.29089	-1.26631	1.21737	1.10075
Zm00001eb282770	679.34	-1.5246	0.371739	-4.10127	4.10881e-05	0.000258578	TRUE	0.920574	0.088138	-0.515628	-1.12126	-1.29365	1.18611	0.735718
Zm00001eb285330	222.179	-1.52447	0.43972	-3.46691	0.000526473	0.00240748	TRUE	-0.02164	0.880592	1.77899	-0.715269	-1.02743	-0.661295	-0.233949
Zm00001eb376990	566.691	-1.52442	0.347166	-4.39104	1.1281e-05	8.21463e-05	TRUE	0.846863	0.647902	1.31736	-0.999888	-1.20262	-0.802666	0.193043
Zm00001eb126640	513.287	-1.52433	0.425336	-3.58383	0.000338592	0.00162977	TRUE	-0.552294	1.31288	1.40195	-1.05983	-0.930354	-0.052938	-0.119409
Zm00001eb268750	5835.4	-1.52379	0.297177	-5.12756	2.93515e-07	3.01049e-06	TRUE	0.302308	0.261843	1.10832	-1.31053	-1.29808	-0.152824	1.08895
Zm00001eb352040	970.099	-1.52314	0.311639	-4.88752	1.02116e-06	9.32118e-06	TRUE	1.3506	0.086395	1.25998	-1.11186	-1.07319	-0.080091	-0.431829
Zm00001eb390640	4116.59	-1.52203	0.297115	-5.12269	3.01206e-07	3.07824e-06	TRUE	0.425709	0.768825	1.73507	-0.591603	-0.607436	-0.885348	-0.845217
Zm00001eb091670	2348.65	-1.52183	0.262605	-5.79514	6.82648e-09	9.37403e-08	TRUE	0.586988	0.972976	1.1892	-1.18677	-1.26879	-0.488292	0.194687
Zm00001eb250790	226.758	-1.52181	0.3665	-4.15228	3.29177e-05	0.000213409	TRUE	1.31936	0.152996	0.700873	-1.23631	-1.43529	0.37559	0.122779
Zm00001eb178450	1257.51	-1.52107	0.358267	-4.24563	2.17976e-05	0.000148439	TRUE	-0.415959	1.249	1.24537	-1.19014	-1.10892	-0.040598	0.261251
Zm00001eb147040	170.251	-1.52055	0.408154	-3.72543	0.000194982	0.00100599	TRUE	0.800914	-0.169319	0.054813	-1.38792	-1.21929	0.774452	1.14635
Zm00001eb373490	1182.7	-1.52026	0.378918	-4.01211	6.01789e-05	0.000359881	TRUE	-0.145851	0.880733	1.85815	-0.707045	-0.82041	-0.463482	-0.602094
Zm00001eb418010	551.848	-1.51917	0.417532	-3.63845	0.000274283	0.00136134	TRUE	0.095871	-0.186449	0.394588	-0.934112	-1.18576	-0.05981	1.87568
Zm00001eb277070	2944.66	-1.51859	0.505193	-3.00596	0.00264743	0.00944748	TRUE	-0.664512	1.04614	1.80364	-0.620634	-0.594081	-0.515297	-0.455252
Zm00001eb418940	969.723	-1.51853	0.323421	-4.69519	2.66358e-06	2.24098e-05	TRUE	0.118023	1.02493	1.61445	-1.12974	-0.878926	-0.375156	-0.373582
Zm00001eb168000	490.175	-1.51785	0.31023	-4.89266	9.94803e-07	9.11581e-06	TRUE	1.09244	0.581334	1.02233	-1.14215	-1.36264	-0.444844	0.253542
Zm00001eb340590	5251.13	-1.51682	0.341035	-4.44769	8.67977e-06	6.51786e-05	TRUE	0.240148	0.68002	1.66159	-1.08395	-0.970675	-0.74467	0.217534
Zm00001eb084990	1258.17	-1.51585	0.297911	-5.08828	3.61324e-07	3.64018e-06	TRUE	0.039675	0.003773	0.195724	-1.1179	-1.29084	0.49713	1.67243
Zm00001eb387370	1093.17	-1.51553	0.411825	-3.68003	0.000233209	0.00118019	TRUE	1.83724	-0.27759	0.009959	-0.887706	-1.26101	0.31712	0.261989
Zm00001eb361120	780.481	-1.51519	0.34847	-4.34812	1.3731e-05	9.80735e-05	TRUE	1.09643	0.271422	0.430299	-1.53609	-1.09341	-0.149259	0.980616
Zm00001eb205020	1617.82	-1.5146	0.238117	-6.36073	2.00795e-10	3.51205e-09	TRUE	1.0363	0.820655	1.23287	-1.07221	-1.02933	-0.626672	-0.361605
Zm00001eb205690	362.026	-1.51457	0.296938	-5.10064	3.38512e-07	3.4323e-06	TRUE	0.977011	0.835808	1.34746	-0.662782	-0.740876	-0.868614	-0.888007
Zm00001eb359330	3538.28	-1.51442	0.381399	-3.97069	7.16656e-05	0.000418506	TRUE	0.012012	0.558669	1.66325	-1.02072	-1.03043	-0.72423	0.541445
Zm00001eb321350	605.367	-1.5137	0.320763	-4.71906	2.36932e-06	2.0125e-05	TRUE	-0.005558	0.074909	0.421008	-1.15658	-1.36265	0.483178	1.54569
Zm00001eb287570	3317.29	-1.51182	0.425703	-3.55136	0.000383249	0.00181941	TRUE	-0.503047	0.863408	1.88468	-0.804959	-0.747284	-0.307153	-0.385643
Zm00001eb390320	9266.19	-1.51173	0.357878	-4.22416	2.39832e-05	0.000161693	TRUE	1.64856	0.302095	0.914455	-0.550737	-0.35395	-1.02785	-0.932577
Zm00001eb203690	1542.97	-1.5105	0.33777	-4.47198	7.75001e-06	5.87005e-05	TRUE	-0.273561	0.471596	1.59281	-1.27164	-1.1592	0.312405	0.327595
Zm00001eb060760	766.027	-1.51034	0.295717	-5.10739	3.26647e-07	3.3215e-06	TRUE	0.496429	0.976213	1.57248	-0.811518	-0.722813	-0.808397	-0.702391
Zm00001eb395780	7639.88	-1.51027	0.358426	-4.21362	2.51315e-05	0.000168467	TRUE	-0.022367	0.866258	1.84913	-0.705098	-0.579122	-0.754063	-0.654733
Zm00001eb006390	3100.83	-1.51014	0.260909	-5.788	7.12279e-09	9.76201e-08	TRUE	0.754638	0.62295	1.38144	-1.32478	-1.10245	-0.398918	0.067111
Zm00001eb424850	4731.58	-1.50808	0.294149	-5.12691	2.94535e-07	3.01659e-06	TRUE	0.975649	0.702507	1.42433	-0.613394	-0.651103	-1.05424	-0.783748
Zm00001eb343100	345.973	-1.50754	0.419634	-3.59252	0.000327495	0.00158268	TRUE	1.89219	0.52339	0.351048	-0.442889	-0.744904	-0.677522	-0.901314
Zm00001eb074060	958.486	-1.50728	0.313729	-4.80439	1.55225e-06	1.36762e-05	TRUE	1.49846	0.309202	1.02969	-1.11252	-0.957614	-0.657208	-0.110008
Zm00001eb199960	1432.77	-1.50648	0.33411	-4.50895	6.51493e-06	5.02524e-05	TRUE	1.64463	0.189915	0.323405	-1.0778	-1.28482	-0.298416	0.503073
Zm00001eb299230	3059.31	-1.5063	0.333891	-4.51136	6.44137e-06	4.97663e-05	TRUE	1.44718	0.295113	0.396646	-1.15167	-1.21968	-0.524207	0.756631
Zm00001eb161640	607.894	-1.50494	0.279064	-5.3928	6.93696e-08	8.05244e-07	TRUE	0.821501	0.345505	1.09898	-1.36403	-1.39941	0.082352	0.415097
Zm00001eb142960	259.311	-1.50474	0.4001	-3.7609	0.0001693	0.000889123	TRUE	0.755057	-0.12593	-0.189946	-1.07983	-1.40892	1.27629	0.77327
Zm00001eb101990	12274.4	-1.50448	0.38186	-3.93987	8.15256e-05	0.000468764	TRUE	0.627288	0.507662	1.71923	-0.76648	-0.798788	-1.05483	-0.23408
Zm00001eb231010	505.174	-1.5042	0.285072	-5.27658	1.31618e-07	1.45179e-06	TRUE	0.910176	0.994592	0.896318	-1.18932	-1.34055	-0.391168	0.119961
Zm00001eb228130	495.407	-1.5032	0.273086	-5.5045	3.70212e-08	4.50382e-07	TRUE	1.13834	0.913659	1.14036	-0.805891	-0.885782	-0.816877	-0.683819
Zm00001eb361460	5744.55	-1.50264	0.292434	-5.13838	2.77113e-07	2.85464e-06	TRUE	0.793373	0.702234	1.39695	-1.20712	-0.953819	-0.747522	0.015908
Zm00001eb426150	576.224	-1.50051	0.329199	-4.55807	5.16263e-06	4.09804e-05	TRUE	1.81316	0.310922	0.564848	-1.03973	-1.00051	-0.370591	-0.2781
Zm00001eb145400	4696.67	-1.50017	0.319601	-4.69388	2.6807e-06	2.25271e-05	TRUE	-0.026728	1.13171	1.62957	-0.92521	-0.868904	-0.540195	-0.400245
Zm00001eb160620	5527.78	-1.49753	0.342545	-4.37178	1.23238e-05	8.89634e-05	TRUE	1.93004	0.046657	0.221621	-1.00983	-1.05137	-0.279642	0.142524
Zm00001eb341010	595.214	-1.49739	0.351611	-4.25866	2.05659e-05	0.000140727	TRUE	-0.180468	0.924082	1.17188	-1.09319	-1.51585	0.288391	0.405153
Zm00001eb061000	127.683	-1.49691	0.489288	-3.05938	0.00221799	0.00814028	TRUE	1.90643	0.2436	0.295422	-0.817179	-1.06485	0.077787	-0.641215
Zm00001eb294920	1132.34	-1.49654	0.331851	-4.50966	6.49308e-06	5.01112e-05	TRUE	0.020526	1.74193	0.660139	-0.986302	-1.2323	-0.195068	-0.008927
Zm00001eb346760	640.302	-1.49643	0.346105	-4.32362	1.53489e-05	0.000108536	TRUE	1.12581	0.720728	0.812938	-1.57879	-0.926311	-0.385142	0.230768
Zm00001eb190960	2430.13	-1.49558	0.294418	-5.07977	3.77899e-07	3.78417e-06	TRUE	1.19987	0.480586	1.33843	-0.38806	-0.646441	-0.975353	-1.00904
Zm00001eb214510	483.598	-1.49476	0.384751	-3.88502	0.000102323	0.000572566	TRUE	0.059981	0.594583	1.64637	-0.912866	-1.3601	-0.366658	0.338697
Zm00001eb209440	3371.52	-1.49385	0.338674	-4.41087	1.02957e-05	7.57493e-05	TRUE	0.275124	0.815039	1.7622	-0.785421	-0.741329	-0.896893	-0.428719
Zm00001eb055010	341.835	-1.49212	0.390908	-3.81706	0.000135053	0.000730633	TRUE	1.94147	0.24493	0.084944	-0.998231	-1.07033	-0.122136	-0.08065
Zm00001eb328070	657.624	-1.49164	0.320533	-4.65363	3.26143e-06	2.68973e-05	TRUE	1.36519	0.41363	1.24336	-1.0008	-0.735561	-0.800839	-0.48498
Zm00001eb002420	2497.49	-1.49092	0.314583	-4.73937	2.14386e-06	1.84084e-05	TRUE	0.223811	0.939527	1.72219	-0.751486	-0.721041	-0.610792	-0.802213
Zm00001eb148730	2405.53	-1.49049	0.388499	-3.83653	0.000124787	0.000683963	TRUE	-0.751997	0.332152	0.282007	-1.07507	-1.04687	0.661031	1.59874
Zm00001eb398380	1009.08	-1.48781	0.262826	-5.66083	1.50645e-08	1.95687e-07	TRUE	0.757602	0.243416	0.590149	-1.32474	-1.54737	0.484192	0.796744
Zm00001eb192150	2651.99	-1.48577	0.298166	-4.98303	6.25975e-07	5.99558e-06	TRUE	0.674457	0.01451	0.656898	-1.33921	-1.28315	-0.017001	1.2935
Zm00001eb060830	1913.57	-1.48544	0.246874	-6.017	1.77674e-09	2.7042e-08	TRUE	1.40308	0.753577	0.973225	-0.665072	-0.648167	-0.95171	-0.864937
Zm00001eb030960	305.211	-1.48424	0.483404	-3.07039	0.00213783	0.00788894	TRUE	-0.205149	0.845221	1.88065	-0.403664	-0.836078	-0.750557	-0.530426
Zm00001eb201580	1557.28	-1.48296	0.440399	-3.36731	0.000759042	0.00329569	TRUE	-0.418176	0.728625	1.89661	-0.752011	-0.839397	0.036768	-0.652418
Zm00001eb351120	2065.05	-1.48285	0.409268	-3.62318	0.000291008	0.00143133	TRUE	1.65651	-0.287351	-0.285067	-1.00391	-1.10372	0.098059	0.925478
Zm00001eb398890	300.326	-1.48043	0.418891	-3.53416	0.000409076	0.0019259	TRUE	0.451426	0.404636	1.89774	-0.735694	-0.376016	-0.831114	-0.810978
Zm00001eb057590	1914.74	-1.47957	0.249774	-5.92364	3.14889e-09	4.57654e-08	TRUE	0.783191	0.751895	1.49692	-1.09077	-0.944299	-0.466307	-0.530628
Zm00001eb020660	673.86	-1.47866	0.457198	-3.23418	0.00121993	0.00492171	TRUE	-0.505259	0.936697	1.86417	-0.690205	-0.727881	-0.41651	-0.461007
Zm00001eb207930	4270.85	-1.47737	0.28463	-5.19049	2.09736e-07	2.21197e-06	TRUE	0.783932	0.798081	1.35739	-1.01666	-1.11002	-0.800061	-0.012667
Zm00001eb083200	706.323	-1.47703	0.305739	-4.83101	1.35845e-06	1.21117e-05	TRUE	1.47199	0.368203	1.11748	-0.945443	-0.974561	-0.70171	-0.335964
Zm00001eb190810	2473.9	-1.47703	0.37492	-3.93958	8.16259e-05	0.000469151	TRUE	-0.061415	1.11811	1.63027	-0.901703	-0.725555	-0.223827	-0.835876
Zm00001eb052910	1106.12	-1.47594	0.320583	-4.60394	4.14567e-06	3.33937e-05	TRUE	0.987472	0.509115	1.54123	-0.681993	-0.789233	-0.589412	-0.977183
Zm00001eb143140	649.485	-1.47591	0.474109	-3.11302	0.00185183	0.00697325	TRUE	-0.221522	1.55	0.983347	-0.899267	-0.834081	0.385217	-0.963691
Zm00001eb398330	1032.32	-1.47576	0.42715	-3.45489	0.000550509	0.00250288	TRUE	1.10072	-0.499559	-0.325042	-1.01476	-1.04623	0.294122	1.49075
Zm00001eb289270	298.179	-1.47491	0.366981	-4.01902	5.84404e-05	0.000350964	TRUE	1.39089	0.423801	1.21886	-0.584747	-0.994632	-0.803449	-0.650724
Zm00001eb433440	1459.27	-1.47456	0.344024	-4.28622	1.81739e-05	0.000126619	TRUE	1.24215	-0.110245	0.088034	-1.15779	-1.29602	0.044303	1.18956
Zm00001eb353320	1921.96	-1.47443	0.27827	-5.29856	1.16722e-07	1.30473e-06	TRUE	0.436842	0.977545	1.50274	-1.19188	-0.909449	-0.494274	-0.321519
Zm00001eb223320	835.733	-1.47372	0.309636	-4.75953	1.94042e-06	1.67835e-05	TRUE	0.544084	0.453525	1.08229	-1.38838	-1.25446	0.859059	-0.296109
Zm00001eb413890	250.037	-1.47371	0.373322	-3.94755	7.89538e-05	0.000455453	TRUE	1.35264	0.935956	0.079688	-1.36927	-1.12786	-0.193189	0.322033
Zm00001eb051110	1162.9	-1.4731	0.327616	-4.49644	6.91013e-06	5.29553e-05	TRUE	1.63077	0.276059	0.479926	-1.04509	-1.28141	-0.416124	0.355872
Zm00001eb124530	1161.33	-1.47277	0.402399	-3.65997	0.000252247	0.00126884	TRUE	1.5767	-0.340715	-0.31392	-1.0476	-1.15914	0.513659	0.771023
Zm00001eb050840	720.463	-1.47175	0.336368	-4.37541	1.21204e-05	8.7718e-05	TRUE	0.246627	0.793627	1.79229	-0.821317	-0.828245	-0.455924	-0.727058
Zm00001eb120830	1646.67	-1.47109	0.425426	-3.45793	0.000544339	0.00247959	TRUE	-0.504804	-0.234764	-0.190036	-0.714864	-0.721749	2.1377	0.228514
Zm00001eb291870	837.126	-1.46805	0.404561	-3.62876	0.000284784	0.00140608	TRUE	-0.162129	0.729765	1.85538	-0.706998	-1.06739	-0.597439	-0.051193
Zm00001eb370240	961.513	-1.46762	0.28955	-5.06864	4.00678e-07	3.97734e-06	TRUE	0.672448	0.2787	1.2812	-1.1911	-1.50015	0.064831	0.394067
Zm00001eb184050	350.99	-1.46686	0.448104	-3.27349	0.00106227	0.00436257	TRUE	-0.441783	0.118536	0.395492	-0.88135	-1.26085	1.78514	0.284808
Zm00001eb099480	1747.53	-1.46659	0.295303	-4.9664	6.82081e-07	6.47179e-06	TRUE	0.458556	0.934708	1.58335	-0.913785	-0.881072	-0.813929	-0.367823
Zm00001eb374100	552.842	-1.46622	0.31626	-4.63611	3.55029e-06	2.90935e-05	TRUE	0.407406	1.05354	1.55755	-0.80818	-0.73645	-0.646225	-0.827642
Zm00001eb274700	752.12	-1.46609	0.369237	-3.9706	7.16933e-05	0.000418506	TRUE	-0.361107	0.640485	1.50541	-1.10429	-1.26381	-0.029547	0.61286
Zm00001eb136080	929.439	-1.46387	0.295857	-4.94789	7.50216e-07	7.04289e-06	TRUE	0.919403	0.684343	1.30525	-1.02279	-1.20102	-0.702725	0.01754
Zm00001eb375130	2677.27	-1.46352	0.256959	-5.69553	1.22989e-08	1.61388e-07	TRUE	1.10692	0.658654	1.34874	-0.539622	-0.743904	-0.941203	-0.889584
Zm00001eb356410	9361.45	-1.46329	0.278589	-5.2525	1.5005e-07	1.62727e-06	TRUE	1.07294	0.733727	1.32709	-0.656894	-0.70661	-1.04574	-0.724505
Zm00001eb064730	447.454	-1.46279	0.35893	-4.07542	4.59312e-05	0.000282751	TRUE	1.6846	0.453957	0.25058	-0.954338	-1.40788	-0.014198	-0.012728
Zm00001eb326680	352.476	-1.46186	0.367094	-3.98224	6.82697e-05	0.000401661	TRUE	-0.147239	1.22162	1.24346	-1.14769	-1.22272	-0.224872	0.277444
Zm00001eb324590	2931.7	-1.46156	0.260119	-5.61883	1.92253e-08	2.45024e-07	TRUE	0.686045	0.664715	1.51392	-1.04128	-1.20551	-0.492192	-0.1257
Zm00001eb042730	1121.67	-1.46145	0.385499	-3.79105	0.000150013	0.000800278	TRUE	-0.012556	1.17975	1.14703	-1.344	-0.874963	-0.645924	0.550668
Zm00001eb373390	258.312	-1.45871	0.340713	-4.28136	1.85756e-05	0.000128903	TRUE	0.538876	0.730527	-0.004532	-1.48524	-1.32902	0.733726	0.81567
Zm00001eb339070	5127.79	-1.45697	0.428859	-3.39732	0.000680504	0.00300621	TRUE	-0.362892	0.809625	1.94357	-0.641659	-0.529295	-0.615864	-0.603483
Zm00001eb131790	2937.86	-1.4569	0.30099	-4.84036	1.29607e-06	1.157e-05	TRUE	1.50215	0.811399	0.521722	-0.889831	-1.27039	-0.637048	-0.037998
Zm00001eb300350	973.354	-1.45636	0.279024	-5.21947	1.79432e-07	1.9166e-06	TRUE	0.575654	0.191347	1.0208	-1.30622	-1.48507	0.797397	0.206092
Zm00001eb292540	4503.34	-1.45322	0.295569	-4.91669	8.80198e-07	8.13395e-06	TRUE	0.236903	0.849412	1.62709	-1.26276	-0.911114	-0.318307	-0.22123
Zm00001eb079180	3110.15	-1.45274	0.429737	-3.38054	0.000723448	0.00316439	TRUE	-0.567837	0.729577	1.92792	-0.821131	-0.799394	-0.284989	-0.184143
Zm00001eb079800	189.113	-1.45238	0.418672	-3.46902	0.000522356	0.0023902	TRUE	1.66013	0.445457	0.643153	-1.33776	-0.767961	-0.472858	-0.170164
Zm00001eb029080	619.577	-1.45212	0.399885	-3.63134	0.000281956	0.00139406	TRUE	-0.029262	-0.093225	0.280306	-1.03767	-0.989839	-0.091665	1.96136
Zm00001eb226270	644.029	-1.45155	0.311109	-4.66573	3.07523e-06	2.54802e-05	TRUE	1.24331	0.333703	0.91175	-1.11955	-1.42474	-0.308918	0.364449
Zm00001eb071720	1416.37	-1.45112	0.302745	-4.79321	1.64136e-06	1.43987e-05	TRUE	1.75644	0.488437	0.589571	-0.838347	-1.09566	-0.550423	-0.350016
Zm00001eb403830	645.075	-1.45027	0.382258	-3.79397	0.00014826	0.000792417	TRUE	1.94827	0.362956	0.401018	-0.604316	-0.767736	-0.498327	-0.841866
Zm00001eb086540	4003.27	-1.44903	0.256634	-5.64631	1.63924e-08	2.11773e-07	TRUE	1.02939	0.938312	1.21084	-0.84636	-0.733358	-0.974861	-0.623954
Zm00001eb314250	603.775	-1.44901	0.366924	-3.94908	7.84519e-05	0.000453068	TRUE	-0.003528	0.723958	1.25909	-1.23875	-1.16176	-0.466918	0.887901
Zm00001eb017520	993.78	-1.44871	0.270362	-5.35843	8.39476e-08	9.61095e-07	TRUE	0.93679	0.723202	0.065285	-1.36222	-1.45288	0.676787	0.413035
Zm00001eb427870	4680.94	-1.44824	0.34238	-4.22994	2.33755e-05	0.000157896	TRUE	1.99611	0.159645	0.475876	-0.732551	-0.726614	-0.662594	-0.509873
Zm00001eb274710	378.708	-1.44814	0.309892	-4.67305	2.96757e-06	2.47036e-05	TRUE	0.62956	1.25286	0.573143	-1.47703	-1.21082	-0.007985	0.240276
Zm00001eb428430	285.039	-1.4446	0.347479	-4.15737	3.21933e-05	0.000209262	TRUE	-0.007553	0.307081	1.1441	-1.33153	-1.40826	0.663668	0.632496
Zm00001eb374440	868.77	-1.44408	0.354835	-4.06973	4.70684e-05	0.000289032	TRUE	0.079461	-0.333211	-0.113705	-0.915917	-1.09802	0.48726	1.89413
Zm00001eb129360	2032.35	-1.4432	0.373305	-3.86601	0.000110629	0.000612039	TRUE	-0.585478	1.12507	0.965811	-1.18352	-1.15268	0.853656	-0.022862
Zm00001eb195620	285.272	-1.44268	0.389524	-3.7037	0.000212477	0.0010869	TRUE	1.17796	0.128054	0.709172	-1.0107	-1.66221	0.114015	0.543716
Zm00001eb287590	541.692	-1.44229	0.446345	-3.23133	0.00123215	0.0049583	TRUE	1.3556	0.347079	1.2034	-1.08803	-0.438262	-0.325234	-1.05454
Zm00001eb173660	3661.35	-1.44175	0.335956	-4.29147	1.77495e-05	0.000123906	TRUE	1.62752	0.165511	0.94818	-0.969568	-0.897871	-0.822101	-0.051666
Zm00001eb051520	803.609	-1.44159	0.42181	-3.41763	0.000631695	0.00281868	TRUE	1.76955	0.348122	0.65556	-0.32494	-0.44067	-1.04033	-0.967294
Zm00001eb279260	380.473	-1.43862	0.293963	-4.89387	9.88714e-07	9.07174e-06	TRUE	1.35176	0.700059	1.04192	-0.987621	-1.00948	-0.52269	-0.573953
Zm00001eb038160	159.726	-1.4378	0.453915	-3.16755	0.00153728	0.00596778	TRUE	-0.194665	-0.321553	0.411428	-1.0622	-1.05206	1.81388	0.405166
Zm00001eb058010	404.773	-1.43742	0.306089	-4.6961	2.65172e-06	2.23232e-05	TRUE	0.852076	0.277414	0.358393	-1.30093	-1.55127	0.542458	0.821857
Zm00001eb278990	1101.85	-1.43569	0.310631	-4.62186	3.8031e-06	3.1004e-05	TRUE	0.006018	1.17026	0.769051	-1.1402	-1.54742	0.18547	0.556828
Zm00001eb243750	1711.14	-1.43536	0.357386	-4.01629	5.91217e-05	0.000354455	TRUE	0.769653	0.635108	1.28684	-0.978824	-1.14241	-0.964325	0.393963
Zm00001eb427100	772.311	-1.43498	0.282922	-5.07198	3.93693e-07	3.92173e-06	TRUE	0.754228	0.734196	1.58536	-0.806178	-0.796242	-0.81434	-0.657018
Zm00001eb021010	160.474	-1.43398	0.480028	-2.98728	0.00281474	0.00990502	TRUE	1.95839	0.111175	0.435589	-0.606908	-1.07016	-0.183617	-0.644465
Zm00001eb217000	610.636	-1.4338	0.265155	-5.40741	6.39428e-08	7.45911e-07	TRUE	1.20259	1.01215	0.975646	-0.932926	-0.767196	-0.808707	-0.681551
Zm00001eb129710	1513.07	-1.43378	0.316177	-4.53473	5.76776e-06	4.52771e-05	TRUE	0.060155	0.914086	1.69318	-1.10441	-0.9197	-0.218077	-0.425237
Zm00001eb314310	113.021	-1.43345	0.45612	-3.1427	0.00167396	0.00638825	TRUE	1.01195	0.953915	1.12481	-1.01985	-0.834732	-1.00533	-0.23077
Zm00001eb155160	969.446	-1.43327	0.277435	-5.16612	2.38999e-07	2.4928e-06	TRUE	0.975583	0.023321	0.572705	-1.31242	-1.49402	0.654576	0.580253
Zm00001eb139140	3455.38	-1.43321	0.350494	-4.08912	4.33016e-05	0.000270087	TRUE	-0.268735	0.579904	1.72179	-1.02853	-1.16579	-0.233162	0.394513
Zm00001eb322400	13056.6	-1.43167	0.406107	-3.52537	0.000422898	0.00198111	TRUE	-0.201144	0.681372	1.97675	-0.684674	-0.600481	-0.775386	-0.396435
Zm00001eb314220	1701.97	-1.43089	0.380231	-3.76322	0.000167738	0.000883209	TRUE	0.431532	1.01161	1.41533	-0.90791	-0.879505	0.019387	-1.09044
Zm00001eb423510	1181.18	-1.43079	0.316601	-4.51921	6.20694e-06	4.81386e-05	TRUE	0.900936	0.921964	1.28721	-0.87973	-0.842074	-1.03671	-0.351594
Zm00001eb253790	4937.67	-1.42973	0.275728	-5.18528	2.15688e-07	2.27137e-06	TRUE	1.07059	0.279149	1.4688	-0.94517	-1.22668	-0.398678	-0.248002
Zm00001eb058320	1035.81	-1.42923	0.308535	-4.6323	3.61628e-06	2.95659e-05	TRUE	1.49312	0.769655	0.81909	-0.732328	-0.525504	-1.03714	-0.786888
Zm00001eb352390	997.969	-1.42856	0.315466	-4.5284	5.94315e-06	4.63716e-05	TRUE	1.2956	0.070742	0.558332	-1.17028	-1.43898	0.74858	-0.063994
Zm00001eb286800	1362.79	-1.42764	0.336473	-4.24295	2.20598e-05	0.000149865	TRUE	0.085649	1.62582	1.13298	-0.882274	-0.610217	-0.699148	-0.652808
Zm00001eb252650	556.706	-1.42655	0.335245	-4.25524	2.08825e-05	0.000142618	TRUE	1.32449	0.371168	0.732068	-1.26682	-1.17175	-0.539624	0.550462
Zm00001eb120970	2654.84	-1.4265	0.288471	-4.94505	7.61231e-07	7.13686e-06	TRUE	0.892651	-0.168228	0.903739	-1.31309	-1.3584	0.172094	0.871236
Zm00001eb347200	9184.68	-1.42578	0.334013	-4.26862	1.96685e-05	0.000135699	TRUE	1.3483	0.291945	0.916353	-1.09568	-1.08426	-0.824755	0.448102
Zm00001eb148640	2279.08	-1.42536	0.252728	-5.63989	1.70164e-08	2.19035e-07	TRUE	1.3075	0.565227	1.2392	-0.733435	-0.732191	-0.767627	-0.878673
Zm00001eb394580	1764.21	-1.42512	0.305383	-4.66667	3.06124e-06	2.53791e-05	TRUE	0.853381	0.602115	1.5742	-0.757665	-0.865002	-0.947385	-0.459642
Zm00001eb041600	1100.87	-1.42036	0.287852	-4.93435	8.04181e-07	7.49003e-06	TRUE	0.78767	0.644263	1.61662	-0.72325	-0.757938	-0.895821	-0.671546
Zm00001eb064710	2276.93	-1.42007	0.342611	-4.14485	3.4004e-05	0.000219448	TRUE	1.72683	0.032131	0.657687	-0.990642	-1.08775	-0.594984	0.256734
Zm00001eb179330	2671.89	-1.41932	0.267812	-5.2997	1.15994e-07	1.29762e-06	TRUE	0.806945	0.654897	1.4457	-0.986949	-1.21778	-0.602294	-0.10052
Zm00001eb257330	539.586	-1.41917	0.387781	-3.65972	0.000252494	0.00126963	TRUE	-0.04323	1.00175	1.69911	-0.734711	-0.992679	-0.738758	-0.191487
Zm00001eb370100	2245.99	-1.41863	0.316279	-4.48537	7.27868e-06	5.54799e-05	TRUE	-0.154254	1.26058	1.22802	-1.16683	-1.15912	-0.29917	0.290776
Zm00001eb125400	1041.44	-1.41841	0.320146	-4.43051	9.40099e-06	6.97818e-05	TRUE	0.72252	0.707199	1.60212	-0.890135	-0.631267	-0.954572	-0.555869
Zm00001eb413710	273.158	-1.41835	0.380957	-3.72312	0.000196779	0.00101392	TRUE	0.037898	-0.288975	-0.158539	-0.944023	-1.16943	0.788127	1.73494
Zm00001eb378300	513.972	-1.41829	0.364315	-3.89303	9.89993e-05	0.000556601	TRUE	1.86935	0.47076	0.438413	-0.708472	-0.916274	-0.782608	-0.371164
Zm00001eb168260	2915.78	-1.4173	0.378263	-3.74685	0.000179071	0.000933523	TRUE	1.945	0.160184	0.450176	-0.777975	-0.813255	-0.840703	-0.12343
Zm00001eb424960	979.146	-1.41708	0.40069	-3.53659	0.000405322	0.0019114	TRUE	-0.491036	1.47995	1.28915	-0.92473	-0.936658	0.000772	-0.41745
Zm00001eb237700	2189.85	-1.41658	0.354068	-4.00086	6.31137e-05	0.000375532	TRUE	-0.246294	1.0341	1.54804	-1.25589	-0.88345	-0.3179	0.121391
Zm00001eb342290	541.622	-1.41647	0.268546	-5.27458	1.33063e-07	1.46658e-06	TRUE	0.360992	0.464943	0.264577	-1.46135	-1.37651	0.988967	0.758379
Zm00001eb064910	480.759	-1.41636	0.441091	-3.21105	0.00132252	0.00525931	TRUE	-0.033484	0.569819	1.54995	-0.716943	-1.60111	-0.173435	0.4052
Zm00001eb195070	519.327	-1.41627	0.418227	-3.38636	0.000708257	0.00311234	TRUE	1.69314	-0.223095	-0.075264	-1.03955	-1.10161	0.875735	-0.129355
Zm00001eb351060	4639.74	-1.41604	0.237968	-5.95055	2.67247e-09	3.9571e-08	TRUE	1.29194	0.652255	1.1847	-0.916317	-0.82748	-0.788339	-0.596753
Zm00001eb294690	4210.77	-1.41531	0.467476	-3.02756	0.00246538	0.00890085	TRUE	-0.158575	1.6637	1.08745	-0.812957	-0.141983	-0.783963	-0.853671
Zm00001eb109510	172.822	-1.41517	0.370003	-3.82475	0.000130905	0.000711999	TRUE	1.1015	1.17715	0.876339	-0.703579	-0.53146	-1.03891	-0.881045
Zm00001eb051500	310.505	-1.4148	0.390857	-3.61972	0.000294918	0.00144755	TRUE	1.29222	0.481629	1.11475	-0.733095	-1.28385	-0.816574	-0.055082
Zm00001eb158270	6892.05	-1.41256	0.417566	-3.38283	0.000717418	0.00314383	TRUE	2.07168	-0.007342	0.233238	-0.766384	-0.67027	-0.781521	-0.079401
Zm00001eb301770	359.273	-1.41181	0.409008	-3.45179	0.000556872	0.00252856	TRUE	0.131796	-0.289144	0.13726	-0.957775	-1.0859	0.122459	1.94131
Zm00001eb311560	2167.3	-1.41175	0.407912	-3.46093	0.000538314	0.0024553	TRUE	-0.228252	0.595341	2.03599	-0.606455	-0.616525	-0.634809	-0.545291
Zm00001eb260170	741.014	-1.40968	0.296733	-4.75067	2.02746e-06	1.7483e-05	TRUE	0.408406	1.36266	1.26849	-0.611818	-0.673113	-0.893278	-0.861353
Zm00001eb278930	1359.4	-1.40885	0.261096	-5.39592	6.81718e-08	7.92636e-07	TRUE	1.05047	0.642993	1.41875	-0.759127	-0.606771	-0.851273	-0.895044
Zm00001eb016330	1901.46	-1.40861	0.262544	-5.36521	8.08532e-08	9.28666e-07	TRUE	0.643194	0.834716	1.58599	-0.900657	-0.751382	-0.676365	-0.735497
Zm00001eb275230	3734.48	-1.40835	0.278631	-5.05455	4.31409e-07	4.25559e-06	TRUE	1.53139	0.239124	0.979618	-1.10192	-1.07989	-0.503409	-0.064914
Zm00001eb315400	183.709	-1.40819	0.437489	-3.21879	0.00128733	0.00514389	TRUE	1.54333	0.42799	1.00443	-0.405921	-0.973494	-0.93868	-0.657652
Zm00001eb236510	2247.53	-1.40671	0.409708	-3.43345	0.000595956	0.00268284	TRUE	0.160574	0.882193	1.71175	-0.75644	-0.705858	-1.07068	-0.221536
Zm00001eb008090	558.468	-1.40661	0.328338	-4.28402	1.83548e-05	0.000127567	TRUE	1.09103	0.426041	0.381813	-1.13905	-1.57452	-0.025077	0.839761
Zm00001eb012010	1708.68	-1.40602	0.385798	-3.64445	0.000267969	0.0013342	TRUE	-0.023917	0.818911	1.8681	-0.591404	-0.578834	-0.887647	-0.605211
Zm00001eb173190	3682.08	-1.40519	0.231479	-6.07046	1.27547e-09	1.98601e-08	TRUE	1.11762	0.749693	1.22325	-0.936551	-1.12866	-0.601693	-0.423664
Zm00001eb368060	3326.75	-1.40375	0.313924	-4.47162	7.76282e-06	5.87596e-05	TRUE	0.22368	0.556612	1.78664	-1.15221	-0.933037	-0.499583	0.017896
Zm00001eb177930	994.995	-1.40361	0.274972	-5.10454	3.31596e-07	3.36941e-06	TRUE	1.42871	0.529804	1.12576	-0.892047	-0.764136	-0.789513	-0.638577
Zm00001eb240620	2266.84	-1.40319	0.449143	-3.12415	0.00178319	0.00675423	TRUE	-0.363217	0.28693	2.09483	-0.540181	-0.974516	-0.131477	-0.372371
Zm00001eb270250	1454.52	-1.40313	0.372219	-3.76963	0.000163487	0.00086339	TRUE	1.96364	0.085126	0.32341	-0.859225	-0.944991	-0.630172	0.062207
Zm00001eb082590	853.711	-1.40244	0.37174	-3.77264	0.000161527	0.000854631	TRUE	0.990834	0.242331	0.431194	-1.17041	-1.20248	1.27805	-0.569525
Zm00001eb312990	3485.96	-1.40108	0.354793	-3.94901	7.84764e-05	0.000453068	TRUE	0.633894	0.702525	1.05566	-1.14535	-1.11541	-0.909947	0.778632
Zm00001eb009070	928.613	-1.398	0.33932	-4.11999	3.78888e-05	0.000241335	TRUE	1.77002	0.306507	0.379286	-1.21995	-0.943884	-0.468018	0.176046
Zm00001eb015840	613.137	-1.39668	0.308652	-4.5251	6.0366e-06	4.69716e-05	TRUE	1.61688	0.823996	0.594199	-0.57743	-0.789853	-0.780896	-0.886892
Zm00001eb356450	1204.91	-1.39628	0.384706	-3.62947	0.000284003	0.00140369	TRUE	0.128002	0.631412	1.9181	-0.692753	-0.648543	-0.905377	-0.430838
Zm00001eb092100	1369.15	-1.39587	0.316534	-4.40986	1.03439e-05	7.60641e-05	TRUE	1.81148	0.471376	0.348075	-0.871779	-1.20766	-0.324093	-0.227404
Zm00001eb058980	4722.6	-1.39437	0.282121	-4.94245	7.71464e-07	7.22072e-06	TRUE	0.482515	0.502678	0.757781	-1.30675	-1.35743	-0.23429	1.15549
Zm00001eb336420	1707.22	-1.39386	0.358553	-3.88745	0.000101301	0.000567295	TRUE	-0.107283	1.36336	1.49178	-0.596469	-0.660333	-0.766447	-0.724613
Zm00001eb176680	262.586	-1.39168	0.332376	-4.18705	2.826e-05	0.000186976	TRUE	0.910908	0.709	1.43894	-1.11949	-0.877627	-0.601285	-0.460444
Zm00001eb216860	336.626	-1.39165	0.448595	-3.10224	0.00192061	0.00719593	TRUE	-0.227021	1.25494	1.59502	-0.418045	-0.584005	-0.816455	-0.804426
Zm00001eb231810	411.232	-1.39108	0.323026	-4.30641	1.65925e-05	0.000116287	TRUE	-0.062703	-0.142909	-0.266736	-1.08512	-1.01088	1.73523	0.833121
Zm00001eb159670	1102.76	-1.39065	0.297353	-4.67678	2.91412e-06	2.43157e-05	TRUE	1.62314	0.440042	0.938914	-0.784176	-0.763909	-0.858652	-0.595359
Zm00001eb330190	3684.86	-1.39065	0.333948	-4.16427	3.12352e-05	0.000203992	TRUE	-0.039805	1.10911	1.5399	-1.01779	-0.942287	-0.686862	0.03773
Zm00001eb233300	2896.22	-1.39021	0.406253	-3.42202	0.00062157	0.00278226	TRUE	2.14628	-0.180142	0.121344	-0.828936	-0.702826	-0.351352	-0.204366
Zm00001eb150730	5675.35	-1.39016	0.32025	-4.34086	1.41929e-05	0.000101068	TRUE	-0.161237	0.783147	1.56828	-0.999008	-1.3731	0.115586	0.066329
Zm00001eb232690	829.048	-1.38933	0.330577	-4.20276	2.63683e-05	0.000176099	TRUE	1.32974	-0.164163	0.332489	-1.14824	-1.45786	0.68929	0.418751
Zm00001eb301240	18633	-1.38925	0.314198	-4.42158	9.79813e-06	7.23888e-05	TRUE	0.981457	-0.388803	0.228263	-1.13916	-1.38277	1.14798	0.553041
Zm00001eb249260	2534.65	-1.38903	0.433503	-3.20421	0.00135433	0.00536327	TRUE	1.97386	-0.364592	0.093173	-0.847291	-0.900263	-0.442674	0.487788
Zm00001eb387530	318.105	-1.38867	0.309799	-4.48249	7.37773e-06	5.62047e-05	TRUE	0.893225	0.789776	1.44075	-0.852809	-0.938612	-0.724565	-0.607764
Zm00001eb015760	2207.88	-1.38819	0.350936	-3.95568	7.6316e-05	0.000442396	TRUE	-0.110931	0.994322	1.78426	-0.720567	-0.771461	-0.517122	-0.658507
Zm00001eb432740	526.239	-1.3877	0.417394	-3.32468	0.000885189	0.00374371	TRUE	0.849725	-0.708513	0.159857	-1.05033	-1.16844	0.488119	1.42958
Zm00001eb386150	698.771	-1.38729	0.393393	-3.52646	0.000421148	0.00197422	TRUE	0.419308	0.489046	1.75246	-0.881751	-0.897125	-0.96186	0.079918
Zm00001eb191550	8962.36	-1.38684	0.297052	-4.66867	3.03162e-06	2.51777e-05	TRUE	0.298189	0.969666	1.41083	-1.20974	-1.01823	-0.660426	0.209714
Zm00001eb351190	1722.7	-1.38639	0.388432	-3.56919	0.000358083	0.00171255	TRUE	1.61985	0.211684	0.746231	-0.812467	-1.06109	-0.960564	0.256363
Zm00001eb283510	1711.35	-1.38457	0.355348	-3.89638	9.76405e-05	0.000549615	TRUE	1.5091	0.229284	0.757952	-0.899341	-1.23923	-0.764991	0.407223
Zm00001eb098380	323.831	-1.38339	0.433504	-3.19119	0.00141688	0.00556128	TRUE	-0.199186	0.889942	0.200772	-1.08734	-1.11454	1.61564	-0.305288
Zm00001eb187110	699.679	-1.38194	0.388089	-3.56089	0.000369594	0.00176166	TRUE	0.55797	-0.597859	-0.32389	-0.973875	-1.11721	1.13636	1.3185
Zm00001eb334270	729.36	-1.3813	0.357329	-3.86563	0.000110803	0.000612763	TRUE	0.613559	1.53081	0.768004	-0.618267	-1.33499	-0.661093	-0.298021
Zm00001eb230800	227.291	-1.3807	0.441929	-3.12426	0.00178252	0.00675347	TRUE	0.343478	1.00258	1.48091	-0.555323	-1.29547	-0.155927	-0.820252
Zm00001eb279760	9431.34	-1.37955	0.314517	-4.38626	1.15315e-05	8.37123e-05	TRUE	-0.015474	1.03289	1.71421	-0.919164	-0.794607	-0.515862	-0.501996
Zm00001eb430940	872.017	-1.37885	0.439901	-3.13446	0.0017217	0.00654752	TRUE	0.802895	0.510892	1.61869	-0.414139	-0.535445	-1.14963	-0.833257
Zm00001eb331950	1485.57	-1.37752	0.355456	-3.87537	0.000106464	0.000592464	TRUE	1.92563	0.005107	0.666445	-0.692366	-0.929478	-0.607778	-0.367555
Zm00001eb074240	848.185	-1.37701	0.308205	-4.46783	7.9016e-06	5.97145e-05	TRUE	0.790966	0.382877	1.09319	-1.50378	-1.12711	-0.284337	0.648192
Zm00001eb412610	1220.87	-1.37681	0.317803	-4.33229	1.47567e-05	0.000104637	TRUE	0.659457	0.345443	1.25075	-1.14609	-1.33652	-0.501272	0.728238
Zm00001eb360120	321.645	-1.37658	0.331997	-4.14635	3.37812e-05	0.000218209	TRUE	1.02024	0.300593	1.19919	-1.30107	-1.23724	0.330847	-0.312553
Zm00001eb129090	4454.81	-1.37624	0.41239	-3.33724	0.000846153	0.00360225	TRUE	-0.336836	1.11652	1.68773	-0.757386	-0.70986	-0.827042	-0.173121
Zm00001eb139770	992.917	-1.37537	0.327446	-4.2003	2.6656e-05	0.000177769	TRUE	1.05298	0.576344	1.2893	-0.888915	-1.13145	-0.909018	0.010759
Zm00001eb007820	521.733	-1.37499	0.432656	-3.17802	0.00148287	0.00578187	TRUE	1.9496	0.096109	-0.021144	-0.788449	-1.0444	-0.574696	0.382978
Zm00001eb402340	658.241	-1.37361	0.414796	-3.31154	0.000927856	0.00388708	TRUE	-0.357151	1.21664	1.6358	-0.675625	-0.856211	-0.658773	-0.304683
Zm00001eb200930	241.778	-1.37311	0.36755	-3.73585	0.000187082	0.000971363	TRUE	0.359892	1.25775	1.33093	-0.960214	-0.963817	-0.778137	-0.246404
Zm00001eb143390	153.64	-1.37199	0.381793	-3.59355	0.000326198	0.00157761	TRUE	1.46366	1.01107	0.632376	-0.764223	-0.661749	-0.856041	-0.825094
Zm00001eb335830	773.324	-1.37149	0.312609	-4.38725	1.14793e-05	8.34193e-05	TRUE	0.59492	1.04321	1.31424	-1.14717	-0.914901	-0.82011	-0.070183
Zm00001eb163350	678.437	-1.37033	0.379747	-3.60853	0.000307932	0.00150294	TRUE	0.240934	0.749614	1.76002	-0.544864	-0.242782	-0.985469	-0.977448
Zm00001eb130760	1049.2	-1.36977	0.379413	-3.61024	0.000305914	0.0014958	TRUE	0.689463	0.396035	0.185008	-0.938014	-1.81731	0.586328	0.898493
Zm00001eb391700	6756.37	-1.36902	0.3631	-3.77035	0.000163017	0.00086155	TRUE	1.87068	0.056458	0.501995	-0.956293	-0.863747	-0.751369	0.142269
Zm00001eb386720	198.902	-1.36878	0.417637	-3.27745	0.0010475	0.00430438	TRUE	0.35955	1.47026	0.916965	-1.39016	-0.753756	-0.606236	0.003375
Zm00001eb270460	563.835	-1.36851	0.328249	-4.16911	3.05795e-05	0.000200356	TRUE	1.34488	0.428253	0.535233	-1.17158	-1.33013	-0.432903	0.626244
Zm00001eb127720	806.981	-1.36794	0.405193	-3.37601	0.000735445	0.00320898	TRUE	-0.440024	1.042	1.75308	-0.798591	-0.872472	-0.257072	-0.426927
Zm00001eb008850	2045.79	-1.36676	0.320737	-4.26133	2.03214e-05	0.000139525	TRUE	1.39729	0.138881	1.18938	-1.16038	-0.886565	-0.693524	0.014923
Zm00001eb066980	541.031	-1.36649	0.396565	-3.44581	0.000569351	0.00257862	TRUE	2.03951	0.432191	-0.004048	-0.743837	-0.771604	-0.636658	-0.315558
Zm00001eb411680	630.136	-1.36641	0.390979	-3.49485	0.000474334	0.0021931	TRUE	0.153575	1.57675	1.01655	-0.440293	-0.197567	-1.05251	-1.05651
Zm00001eb144630	344.494	-1.36403	0.35391	-3.85417	0.000116124	0.00063983	TRUE	0.708886	1.01829	1.32708	-0.695987	-1.16507	-0.326619	-0.866576
Zm00001eb295070	2055.11	-1.36325	0.229377	-5.94326	2.79413e-09	4.12432e-08	TRUE	0.164877	0.377173	0.491949	-1.40785	-1.39555	0.668425	1.10098
Zm00001eb156750	3087.33	-1.36295	0.311997	-4.36848	1.25113e-05	9.01796e-05	TRUE	0.69718	0.654681	0.311302	-1.06264	-1.77712	0.521791	0.654813
Zm00001eb406320	690.718	-1.36248	0.428531	-3.17942	0.0014757	0.00576186	TRUE	2.10188	-0.072724	-0.007228	-0.649191	-1.0472	-0.216171	-0.10937
Zm00001eb025390	1244.42	-1.36242	0.348712	-3.907	9.34493e-05	0.000528751	TRUE	0.472068	1.00538	1.52026	-0.818088	-0.663554	-1.07139	-0.44468
Zm00001eb111370	296.43	-1.36185	0.397502	-3.42601	0.000612511	0.00274517	TRUE	-0.006979	0.883319	1.77158	-0.780867	-0.999541	-0.652938	-0.214574
Zm00001eb274960	305.065	-1.36164	0.36036	-3.77856	0.000157739	0.000836457	TRUE	0.005054	0.355701	0.979539	-1.42797	-1.21693	0.131261	1.17334
Zm00001eb405410	1207.06	-1.35935	0.314542	-4.32166	1.54858e-05	0.000109232	TRUE	1.76318	0.491209	0.674702	-0.769612	-0.67325	-0.892609	-0.593617
Zm00001eb037000	1488.24	-1.35924	0.279396	-4.86492	1.14503e-06	1.03388e-05	TRUE	0.511613	0.436766	1.57447	-1.18314	-1.24553	-0.284686	0.190509
Zm00001eb153030	1083.79	-1.35816	0.258832	-5.24727	1.54371e-07	1.66775e-06	TRUE	1.0312	0.576041	1.31087	-1.27227	-1.03676	-0.365222	-0.243865
Zm00001eb237060	227.803	-1.35767	0.423347	-3.20699	0.0013413	0.00531909	TRUE	1.6521	-0.087134	1.07889	-0.705702	-1.07493	-0.622484	-0.240747
Zm00001eb005700	266.141	-1.35762	0.386151	-3.51577	0.000438479	0.00204573	TRUE	-0.009031	1.37295	0.411422	-1.09032	-1.4666	0.778418	0.003162
Zm00001eb085430	328.109	-1.35584	0.355807	-3.81062	0.000138621	0.000747318	TRUE	-0.143469	-0.344734	-0.379059	-0.928826	-0.888885	1.82182	0.863155
Zm00001eb264400	880.561	-1.35535	0.348244	-3.89196	9.94394e-05	0.000558633	TRUE	0.494555	0.59636	1.78283	-0.886783	-0.631634	-0.920038	-0.435289
Zm00001eb428660	2377.2	-1.3521	0.30678	-4.40739	1.04624e-05	7.68562e-05	TRUE	0.887749	0.60587	1.54941	-0.776453	-0.532307	-0.70269	-1.03158
Zm00001eb356770	2670.5	-1.35206	0.330939	-4.08552	4.39773e-05	0.000273485	TRUE	1.57167	0.017474	0.897926	-0.951465	-1.17707	-0.608339	0.249804
Zm00001eb020720	862.379	-1.35198	0.283326	-4.77181	1.82576e-06	1.58594e-05	TRUE	0.062511	-0.240814	-0.330481	-1.00503	-1.13846	1.37827	1.274
Zm00001eb038650	331.638	-1.35145	0.34597	-3.90627	9.37305e-05	0.000529497	TRUE	1.60156	0.41154	0.954421	-0.61106	-0.490917	-0.942882	-0.922661
Zm00001eb120310	3624.61	-1.35141	0.28752	-4.70024	2.59858e-06	2.19019e-05	TRUE	0.261728	0.853359	1.66333	-0.907963	-1.13679	-0.526217	-0.207447
Zm00001eb292830	1750.63	-1.3512	0.344705	-3.91987	8.85963e-05	0.000504309	TRUE	0.212707	0.420084	1.73837	-0.949013	-1.16119	-0.616949	0.35599
Zm00001eb093610	13169.9	-1.35065	0.258357	-5.22784	1.71499e-07	1.83879e-06	TRUE	0.243922	0.111218	0.460299	-1.24688	-1.37417	0.335746	1.46986
Zm00001eb323840	3803.06	-1.34975	0.315543	-4.27755	1.88959e-05	0.000130751	TRUE	0.333703	0.137653	1.79694	-1.14682	-1.06928	0.274555	-0.326749
Zm00001eb008800	259.91	-1.34873	0.42648	-3.16247	0.00156436	0.00604945	TRUE	0.990243	0.385528	0.19666	-1.80126	-0.90387	0.312268	0.820426
Zm00001eb084730	488.957	-1.34693	0.450688	-2.98861	0.00280248	0.00987902	TRUE	1.07163	-0.540455	-0.39624	-0.914598	-1.13904	0.496819	1.42189
Zm00001eb410870	620.111	-1.3459	0.389976	-3.45122	0.00055805	0.0025331	TRUE	-0.408139	0.975584	1.55018	-0.878628	-1.27818	-0.170273	0.209447
Zm00001eb340490	1891.32	-1.34528	0.372638	-3.61015	0.000306015	0.0014958	TRUE	-0.289322	0.963498	1.76484	-0.913971	-0.818272	-0.596914	-0.109863
Zm00001eb384890	6750.6	-1.34408	0.337966	-3.97696	6.98031e-05	0.000409156	TRUE	1.4035	-0.077711	0.076184	-1.18944	-1.16495	-0.153442	1.10586
Zm00001eb199160	1224.56	-1.34345	0.253661	-5.29623	1.18216e-07	1.31935e-06	TRUE	0.506011	0.505767	1.12933	-1.50221	-1.30253	0.191527	0.472095
Zm00001eb183370	2461.18	-1.34263	0.388485	-3.45605	0.000548147	0.00249614	TRUE	-0.323653	0.765388	1.83371	-0.875735	-0.881004	-0.626324	0.10762
Zm00001eb300900	2070.98	-1.34206	0.328597	-4.08422	4.42242e-05	0.000274899	TRUE	-0.047688	1.07309	1.69805	-0.748495	-0.918297	-0.551293	-0.505367
Zm00001eb131070	10244.6	-1.3419	0.287276	-4.67112	2.99564e-06	2.49081e-05	TRUE	0.714242	0.697402	1.5345	-0.995119	-0.934386	-0.874838	-0.141804
Zm00001eb229670	985.383	-1.34015	0.35085	-3.81974	0.000133592	0.00072439	TRUE	1.11369	0.793206	1.21484	-0.652728	-0.631266	-1.18483	-0.652911
Zm00001eb010980	4888.58	-1.33995	0.36019	-3.72011	0.000199138	0.00102458	TRUE	1.9821	0.049798	0.545856	-0.743498	-0.688875	-0.781922	-0.363459
Zm00001eb009240	481.477	-1.33913	0.29117	-4.59913	4.24249e-06	3.41349e-05	TRUE	0.602765	0.557723	0.974633	-1.53103	-1.28258	0.059555	0.618939
Zm00001eb034030	245.453	-1.3377	0.400104	-3.34337	0.000827667	0.00353841	TRUE	-0.319573	0.973179	1.32884	-1.11969	-1.29123	-0.079186	0.507659
Zm00001eb336800	627.079	-1.3376	0.44563	-3.00158	0.00268578	0.00955312	TRUE	0.981079	-0.47163	-0.609813	-0.939361	-1.06971	0.745168	1.36427
Zm00001eb300870	1023.14	-1.3368	0.327721	-4.07909	4.52128e-05	0.000279243	TRUE	1.40721	-0.020085	-0.11232	-1.18181	-1.3492	0.609185	0.64702
Zm00001eb187450	197.198	-1.33659	0.444829	-3.00472	0.00265822	0.00947839	TRUE	-0.197716	0.462744	1.83716	-1.02985	-1.01218	-0.407388	0.347232
Zm00001eb220140	11228.6	-1.33642	0.436403	-3.06235	0.00219608	0.00807241	TRUE	1.17884	0.003001	0.901113	-0.909806	-1.0057	-1.06991	0.902455
Zm00001eb249240	499.852	-1.33623	0.35407	-3.77392	0.0001607	0.000851208	TRUE	0.664142	1.73675	0.527234	-0.966388	-0.475733	-0.730679	-0.755327
Zm00001eb228610	571.931	-1.33368	0.332651	-4.00924	6.09133e-05	0.000363354	TRUE	-0.219578	0.538308	0.465615	-1.12368	-1.47748	1.32627	0.490548
Zm00001eb057840	9735.95	-1.33337	0.231498	-5.75973	8.42495e-09	1.13063e-07	TRUE	0.954786	0.702155	1.41006	-1.08704	-0.919968	-0.623009	-0.436984
Zm00001eb068780	1393.63	-1.33312	0.293812	-4.53734	5.69691e-06	4.47953e-05	TRUE	1.60103	0.361504	0.624235	-1.03242	-1.29853	0.128572	-0.384387
Zm00001eb121370	7912.78	-1.33302	0.357971	-3.72381	0.000196237	0.00101149	TRUE	2.02582	0.223922	0.345258	-0.666917	-0.583124	-0.809314	-0.535643
Zm00001eb343270	1395.14	-1.33264	0.326322	-4.08381	4.43042e-05	0.000275276	TRUE	-0.020089	0.660613	1.78017	-0.926693	-1.22263	-0.179158	-0.092207
Zm00001eb254290	2882.84	-1.33257	0.318261	-4.18705	2.82606e-05	0.000186976	TRUE	1.4358	0.781642	0.874527	-0.669033	-0.640399	-1.1324	-0.650134
Zm00001eb431860	224.254	-1.33106	0.351537	-3.7864	0.000152846	0.000813551	TRUE	0.721273	0.296608	0.347058	-1.40902	-1.37565	1.14905	0.270689
Zm00001eb193810	123.977	-1.33095	0.437954	-3.03903	0.00237344	0.00863041	TRUE	-0.282279	-0.004132	-0.011527	-1.13535	-1.04033	1.7315	0.742122
Zm00001eb191980	715.509	-1.32982	0.310984	-4.27619	1.90121e-05	0.00013149	TRUE	1.30586	0.07957	0.86103	-1.42345	-1.14022	-0.133311	0.450515
Zm00001eb192370	358.31	-1.32949	0.397188	-3.34726	0.000816139	0.00350074	TRUE	-0.59808	0.756582	0.951621	-1.41959	-1.08326	0.749989	0.642743
Zm00001eb415380	1575.02	-1.32874	0.335348	-3.96226	7.4243e-05	0.000432145	TRUE	-0.01404	1.1155	1.62451	-1.07089	-0.707613	-0.373631	-0.573846
Zm00001eb283780	11086.2	-1.32857	0.310436	-4.2797	1.87147e-05	0.00012975	TRUE	0.169106	0.650017	1.89943	-0.889802	-0.746309	-0.59821	-0.48423
Zm00001eb156910	355.153	-1.32807	0.354509	-3.74624	0.000179504	0.000935097	TRUE	0.129792	1.31331	0.436832	-1.22109	-1.33952	0.86498	-0.184298
Zm00001eb104710	352.141	-1.32783	0.440558	-3.01397	0.00257851	0.0092364	TRUE	0.028978	1.78488	0.845052	-0.372014	-0.386242	-0.89828	-1.00238
Zm00001eb184520	935.884	-1.32687	0.285613	-4.6457	3.38923e-06	2.78703e-05	TRUE	0.348395	1.25597	1.40571	-0.91014	-0.815225	-0.701312	-0.583399
Zm00001eb039830	746.658	-1.32438	0.297713	-4.4485	8.64719e-06	6.49684e-05	TRUE	1.66122	0.486569	0.855521	-0.656791	-0.734811	-0.833658	-0.778053
Zm00001eb320900	1299.15	-1.32431	0.406124	-3.26085	0.00111081	0.00453302	TRUE	0.715777	-0.51908	-0.602408	-0.978286	-1.01264	1.17722	1.21942
Zm00001eb409440	4747.62	-1.32396	0.324362	-4.08173	4.47013e-05	0.000277015	TRUE	-0.215122	1.02498	1.18493	-1.10641	-1.28796	-0.318026	0.717606
Zm00001eb049330	2795.86	-1.32328	0.300306	-4.40642	1.05091e-05	7.71595e-05	TRUE	1.58786	0.440563	0.974421	-0.663648	-0.728392	-0.988121	-0.622685
Zm00001eb119990	2348.59	-1.32257	0.438839	-3.0138	0.00257996	0.00923927	TRUE	2.08331	-0.281901	-0.057465	-0.790773	-0.803148	-0.45934	0.309315
Zm00001eb059860	1408.34	-1.32226	0.328188	-4.02896	5.60247e-05	0.000338175	TRUE	0.035785	0.967635	1.74658	-0.869378	-0.790045	-0.681669	-0.408907
Zm00001eb123210	2409.19	-1.32184	0.249147	-5.30544	1.12401e-07	1.2624e-06	TRUE	1.01425	0.679487	1.39085	-0.850558	-1.06759	-0.457385	-0.709052
Zm00001eb013760	996.896	-1.32173	0.354797	-3.72532	0.000195068	0.00100599	TRUE	0.399195	1.15942	1.31844	-0.989847	-0.84758	-1.02948	-0.010144
Zm00001eb135800	4691.66	-1.32093	0.314771	-4.19648	2.71098e-05	0.000180287	TRUE	1.63193	0.528419	0.825754	-0.73441	-0.728326	-1.03146	-0.491908
Zm00001eb260050	792.589	-1.31995	0.337443	-3.91163	9.16749e-05	0.000519955	TRUE	1.54753	0.141511	1.20202	-0.548485	-0.77373	-0.855578	-0.713272
Zm00001eb024210	2453.98	-1.31954	0.282919	-4.66402	3.10086e-06	2.56626e-05	TRUE	0.459789	0.884568	1.65144	-0.648366	-0.726538	-0.718261	-0.902631
Zm00001eb350760	246.583	-1.31941	0.378063	-3.48991	0.000483183	0.00222965	TRUE	1.01405	-0.2248	-0.027338	-1.21343	-1.34856	0.832075	0.968006
Zm00001eb184930	1595.48	-1.31939	0.347308	-3.79891	0.000145331	0.000778958	TRUE	0.129899	0.566243	1.96748	-0.584578	-0.768388	-0.639945	-0.670708
Zm00001eb047570	957.227	-1.31937	0.333428	-3.95699	7.58986e-05	0.000440156	TRUE	1.574	0.358145	0.961057	-0.995492	-0.784759	-0.906079	-0.206872
Zm00001eb424450	1252.23	-1.31933	0.294886	-4.47402	7.67614e-06	5.82576e-05	TRUE	1.01902	-0.016119	0.396408	-1.46114	-1.22538	0.231729	1.05548
Zm00001eb418170	2664.04	-1.31927	0.254834	-5.17699	2.255e-07	2.36766e-06	TRUE	0.006257	0.90333	0.872312	-1.3955	-1.38257	0.682386	0.313784
Zm00001eb133480	7694.38	-1.31737	0.30305	-4.34704	1.37987e-05	9.83592e-05	TRUE	1.49634	0.457037	1.06961	-0.613646	-0.66911	-1.0566	-0.683629
Zm00001eb052130	1127.15	-1.3156	0.321064	-4.09764	4.17386e-05	0.000262091	TRUE	0.127738	1.21209	1.51559	-0.922788	-0.797443	-0.77463	-0.360557
Zm00001eb253200	8975.82	-1.31534	0.432914	-3.03835	0.00237881	0.00864774	TRUE	-0.375291	1.0745	1.75999	-0.469675	-0.469008	-0.832675	-0.687843
Zm00001eb217210	375.114	-1.31451	0.404034	-3.25347	0.00114007	0.00464041	TRUE	0.122123	0.519273	1.70206	-1.26454	-0.818318	-0.638134	0.377534
Zm00001eb050760	1980.68	-1.31446	0.299904	-4.38294	1.17089e-05	8.49133e-05	TRUE	1.19137	0.082939	0.467258	-1.4561	-1.16813	0.931807	-0.049139
Zm00001eb423930	4229.34	-1.31243	0.227802	-5.76129	8.34759e-09	1.12131e-07	TRUE	1.40103	0.862	0.88843	-0.789255	-0.880474	-0.807388	-0.674341
Zm00001eb253990	848.287	-1.31234	0.295355	-4.44326	8.86074e-06	6.6292e-05	TRUE	0.009856	0.492872	1.01673	-1.2225	-1.52954	0.361733	0.870853
Zm00001eb269180	1780.86	-1.31232	0.404913	-3.241	0.00119111	0.00482189	TRUE	2.11447	0.20437	0.071286	-0.587207	-0.584128	-0.772875	-0.44591
Zm00001eb007050	760.898	-1.31213	0.290215	-4.52124	6.14781e-06	4.77322e-05	TRUE	0.433431	0.601636	0.228764	-1.18964	-1.64252	0.618516	0.949816
Zm00001eb238900	1887.87	-1.31191	0.409658	-3.20245	0.00136263	0.00539259	TRUE	1.06944	0.697721	0.940697	-0.821261	-1.06465	-1.22915	0.407203
Zm00001eb004780	884.494	-1.31129	0.328148	-3.99602	6.44169e-05	0.000381539	TRUE	0.189863	-0.403463	-0.487975	-1.01584	-0.964024	1.28267	1.39876
Zm00001eb042340	1466.16	-1.31038	0.289683	-4.52351	6.08219e-06	4.73004e-05	TRUE	1.60964	0.231559	1.06941	-0.853904	-0.898952	-0.625535	-0.532214
Zm00001eb080440	740.139	-1.3101	0.344351	-3.80455	0.000142065	0.000764199	TRUE	1.63983	-0.025813	0.558074	-1.00246	-1.32541	-0.257563	0.41334
Zm00001eb431820	824.826	-1.31004	0.438084	-2.99039	0.00278619	0.00983872	TRUE	-0.101644	0.965653	1.70706	-0.178845	-0.429216	-0.970494	-0.992508
Zm00001eb096060	1259.39	-1.30806	0.33712	-3.8801	0.000104414	0.000582659	TRUE	0.413348	0.707008	1.64774	-0.879522	-1.02461	-0.888945	0.024979
Zm00001eb432790	2602.93	-1.30794	0.299402	-4.36852	1.25093e-05	9.01796e-05	TRUE	0.779461	0.557287	1.19506	-1.13226	-1.26404	-0.68611	0.550601
Zm00001eb339000	3178.34	-1.30643	0.317849	-4.11021	3.95295e-05	0.000250212	TRUE	0.939324	0.695036	1.44302	-0.738547	-0.672679	-1.12143	-0.544731
Zm00001eb396100	894.735	-1.3042	0.36659	-3.55766	0.000374168	0.00178107	TRUE	0.679599	0.91997	1.44157	-0.537423	-0.497937	-1.18362	-0.822162
Zm00001eb407020	1178.35	-1.30306	0.28808	-4.52325	6.08977e-06	4.73334e-05	TRUE	0.414764	1.12576	1.49103	-0.798427	-0.742017	-0.60829	-0.882819
Zm00001eb286040	4328.59	-1.30301	0.296988	-4.3874	1.14713e-05	8.34036e-05	TRUE	0.778302	0.676644	1.2161	-0.929334	-1.47699	-0.566705	0.301985
Zm00001eb295890	1209.88	-1.30239	0.275072	-4.73473	2.19344e-06	1.88e-05	TRUE	1.12301	0.015016	0.520991	-1.28423	-1.48197	0.619825	0.48736
Zm00001eb162000	588.087	-1.302	0.385166	-3.38036	0.000723922	0.00316549	TRUE	1.80274	-0.187187	0.118309	-1.03547	-1.12897	-0.146401	0.576973
Zm00001eb326320	316.344	-1.30126	0.365149	-3.56363	0.000365758	0.00174572	TRUE	-0.226176	0.270177	0.216365	-1.01967	-1.49733	1.10502	1.15162
Zm00001eb089060	639.259	-1.29957	0.389453	-3.33691	0.00084714	0.00360333	TRUE	1.28694	-0.314154	0.187852	-0.967485	-1.38922	0.037421	1.15865
Zm00001eb332950	3653.1	-1.29947	0.295129	-4.40308	1.06727e-05	7.82387e-05	TRUE	0.347703	0.991191	1.61685	-0.891612	-0.692931	-0.502256	-0.868943
Zm00001eb036840	614.636	-1.29924	0.4286	-3.03135	0.00243463	0.0088128	TRUE	2.1185	-0.227364	0.250291	-0.746355	-0.739755	-0.525909	-0.12941
Zm00001eb222650	192.614	-1.29884	0.399428	-3.25176	0.00114693	0.00466032	TRUE	-0.44589	-0.183951	-0.410594	-0.866556	-0.870637	1.04807	1.72956
Zm00001eb146500	1932.38	-1.2982	0.286515	-4.53102	5.87008e-06	4.59278e-05	TRUE	1.51563	0.446672	1.0618	-0.747457	-0.857149	-0.903455	-0.516043
Zm00001eb053750	9218.53	-1.29819	0.355956	-3.64705	0.000265271	0.00132309	TRUE	1.10297	0.360907	1.48565	-0.773339	-0.630216	-1.13062	-0.415354
Zm00001eb024560	669.441	-1.29782	0.391856	-3.31197	0.000926414	0.00388218	TRUE	-0.524419	1.48249	0.866564	-1.09352	-1.08124	0.59347	-0.243336
Zm00001eb025070	1088.74	-1.29768	0.325544	-3.98619	6.71423e-05	0.000395849	TRUE	-0.192481	1.39776	0.808981	-1.18503	-1.24665	0.601927	-0.184512
Zm00001eb155390	1523.07	-1.29747	0.378112	-3.43145	0.000600365	0.00269841	TRUE	0.804422	-0.57409	0.004011	-0.973686	-1.23006	0.426608	1.54279
Zm00001eb129370	2012.49	-1.29716	0.277293	-4.67795	2.89764e-06	2.42067e-05	TRUE	0.765206	0.313069	1.7102	-0.994509	-1.0639	-0.411087	-0.318974
Zm00001eb357940	2540.53	-1.29711	0.406237	-3.19299	0.0014081	0.00553292	TRUE	-0.406612	0.843498	1.76793	-0.856068	-0.854963	-0.7007	0.206918
Zm00001eb411120	120.684	-1.29584	0.416811	-3.10893	0.00187764	0.00706295	TRUE	0.219663	0.022035	-0.123157	-1.22384	-1.24814	0.940973	1.41246
Zm00001eb214180	1147.89	-1.29525	0.303767	-4.26397	2.00823e-05	0.000138084	TRUE	1.3208	0.063221	0.229937	-1.25576	-1.34762	0.097127	0.892294
Zm00001eb193940	35097	-1.29516	0.388933	-3.33004	0.000868333	0.00368451	TRUE	1.44675	-0.093505	1.204	-0.835029	-0.851393	-1.00429	0.133469
Zm00001eb276940	175.416	-1.29296	0.419062	-3.08537	0.002033	0.00756111	TRUE	0.362459	0.84444	1.70406	-0.493036	-0.67403	-1.00179	-0.742111
Zm00001eb228270	713.285	-1.2919	0.365565	-3.53398	0.000409348	0.00192654	TRUE	-0.592339	0.730859	0.067467	-1.02979	-1.32005	1.14035	1.0035
Zm00001eb333590	872.667	-1.29174	0.272036	-4.74842	2.05016e-06	1.76573e-05	TRUE	0.843949	0.87367	1.12505	-1.24304	-1.16122	-0.585958	0.147554
Zm00001eb414000	2690.92	-1.29152	0.393224	-3.28443	0.00102189	0.00422611	TRUE	1.95394	0.096539	0.56724	-0.592407	-0.574204	-0.967969	-0.483137
Zm00001eb400820	10536.7	-1.2909	0.278169	-4.64069	3.4725e-06	2.85055e-05	TRUE	0.559038	-0.083372	-0.280231	-1.22732	-1.16336	0.689756	1.50549
Zm00001eb094560	3177.5	-1.29086	0.310443	-4.15813	3.20859e-05	0.000208875	TRUE	1.40226	0.011156	0.344909	-1.27885	-1.19792	-0.182096	0.900541
Zm00001eb307760	731.829	-1.29048	0.346331	-3.72616	0.000194422	0.00100396	TRUE	-0.284627	0.324728	0.793506	-1.21777	-1.2011	1.50036	0.084909
Zm00001eb102420	14502.6	-1.29013	0.385082	-3.35028	0.000807304	0.00346808	TRUE	-0.244027	0.942068	1.75409	-0.751896	-0.848816	-0.830576	-0.020843
Zm00001eb322910	342.585	-1.28931	0.417724	-3.08651	0.00202524	0.00754018	TRUE	1.9384	-0.090026	0.433057	-0.738054	-1.10718	0.08294	-0.519134
Zm00001eb140180	510.186	-1.28878	0.305116	-4.22391	2.40103e-05	0.000161798	TRUE	1.57235	0.510225	0.484271	-1.11534	-1.32134	-0.196373	0.066218
Zm00001eb370810	519.426	-1.28762	0.29557	-4.35639	1.32223e-05	9.48219e-05	TRUE	1.3783	0.953433	0.789027	-0.713117	-0.531342	-0.84447	-1.03184
Zm00001eb386590	2752.44	-1.2857	0.228669	-5.62254	1.88173e-08	2.40471e-07	TRUE	0.885899	0.759328	1.24862	-1.14162	-1.26935	-0.397027	-0.085855
Zm00001eb095330	2995.67	-1.28504	0.249533	-5.14977	2.60803e-07	2.70431e-06	TRUE	0.734631	0.466972	1.17543	-1.33056	-1.33256	0.512901	-0.226809
Zm00001eb249130	735.562	-1.28491	0.294715	-4.35985	1.30153e-05	9.34321e-05	TRUE	0.321351	0.867062	1.41179	-1.05278	-1.40761	0.091771	-0.231584
Zm00001eb336310	6869.84	-1.28485	0.271889	-4.72565	2.2938e-06	1.95421e-05	TRUE	1.0282	0.108036	-0.09178	-1.29727	-1.34115	0.504793	1.08917
Zm00001eb335220	412.704	-1.28457	0.357463	-3.59357	0.000326184	0.00157761	TRUE	1.67385	0.394221	0.855376	-0.800834	-0.785576	-0.950358	-0.386674
Zm00001eb424310	14643.1	-1.28338	0.343986	-3.73089	0.000190804	0.000987433	TRUE	0.327495	-0.079455	0.957902	-1.0518	-1.29083	-0.312073	1.44877
Zm00001eb414030	707.714	-1.28323	0.336606	-3.81225	0.000137705	0.000743848	TRUE	-0.033088	0.580437	0.94475	-1.03954	-1.69381	0.777915	0.46333
Zm00001eb000510	561.963	-1.2829	0.380827	-3.36873	0.000755164	0.00328287	TRUE	2.02667	-0.028131	0.419945	-0.84861	-0.816377	-0.526698	-0.2268
Zm00001eb310930	343.731	-1.28237	0.421405	-3.0431	0.00234158	0.00852967	TRUE	-0.339035	1.46058	1.33904	-0.80672	-0.918684	-0.056387	-0.678797
Zm00001eb231550	1098.1	-1.28235	0.315996	-4.05811	4.94717e-05	0.00030216	TRUE	0.309161	1.02588	1.59631	-0.751629	-0.885945	-0.888782	-0.404992
Zm00001eb342540	2146.93	-1.28156	0.343663	-3.72911	0.000192158	0.000993717	TRUE	1.84238	0.280264	0.661722	-0.81028	-0.632812	-0.928202	-0.413076
Zm00001eb237500	670.341	-1.28148	0.340099	-3.76798	0.000164575	0.000868167	TRUE	0.068485	1.33275	1.46398	-0.800356	-0.591708	-0.731755	-0.741403
Zm00001eb011750	3562.91	-1.2813	0.233712	-5.4824	4.19602e-08	5.03132e-07	TRUE	0.246306	0.109927	0.452255	-1.25459	-1.50102	0.970153	0.976967
Zm00001eb108100	812.496	-1.28089	0.305563	-4.19191	2.76619e-05	0.000183701	TRUE	0.765338	0.667028	1.59972	-0.598649	-0.643431	-1.02873	-0.761283
Zm00001eb368010	1609.89	-1.28018	0.318934	-4.01394	5.97131e-05	0.000357397	TRUE	0.079566	0.564299	1.78419	-1.19706	-0.953889	-0.373755	0.096643
Zm00001eb406960	241.098	-1.27909	0.393956	-3.24678	0.0011672	0.00473591	TRUE	0.875215	0.508283	0.548493	-1.55629	-1.03144	-0.369959	1.02569
Zm00001eb291360	4194.27	-1.27878	0.277224	-4.61278	3.9731e-06	3.22416e-05	TRUE	1.63538	0.368814	0.950285	-0.839647	-0.861431	-0.790843	-0.462559
Zm00001eb121750	829.404	-1.27841	0.323059	-3.95721	7.58292e-05	0.000440114	TRUE	1.58956	0.953622	0.441056	-0.502485	-0.687864	-1.02868	-0.765211
Zm00001eb315860	231.909	-1.27832	0.346653	-3.68762	0.000226363	0.00114965	TRUE	1.11416	0.544061	1.42454	-0.581508	-0.758278	-0.896014	-0.846963
Zm00001eb120360	271.697	-1.27832	0.39486	-3.2374	0.00120625	0.00487484	TRUE	1.72146	-0.036972	1.04073	-0.669219	-0.928964	-0.618962	-0.508075
Zm00001eb076460	1565.7	-1.27804	0.328434	-3.89131	9.97027e-05	0.000559891	TRUE	1.40374	0.353049	1.13632	-0.769029	-1.05656	-0.943726	-0.123793
Zm00001eb144310	5797.63	-1.27782	0.276307	-4.62462	3.75288e-06	3.06298e-05	TRUE	0.234105	1.04243	1.38297	-0.995364	-1.33534	-0.407294	0.078492
Zm00001eb230510	1571.03	-1.27739	0.310071	-4.11967	3.79418e-05	0.000241564	TRUE	1.5224	0.549876	0.435756	-1.1072	-1.17644	-0.638965	0.414577
Zm00001eb030970	1620.83	-1.27732	0.310028	-4.12002	3.78845e-05	0.000241335	TRUE	1.69274	0.176143	1.0092	-0.624579	-0.716296	-0.783065	-0.754147
Zm00001eb016470	321.184	-1.27701	0.418782	-3.04934	0.00229348	0.00838478	TRUE	0.390556	0.78024	1.63337	-0.884835	-0.779568	-0.054807	-1.08496
Zm00001eb322760	600.693	-1.27695	0.336166	-3.79857	0.000145535	0.000779611	TRUE	0.072198	1.07053	1.5774	-0.876777	-1.09344	-0.614791	-0.135118
Zm00001eb271440	1036.12	-1.27649	0.385106	-3.31465	0.000917581	0.00384997	TRUE	1.90386	-0.236389	0.435967	-0.740952	-1.24293	-0.178833	0.059275
Zm00001eb185730	20636.1	-1.27628	0.229195	-5.56853	2.56896e-08	3.22484e-07	TRUE	0.610054	1.11812	1.35503	-0.999009	-0.915859	-0.689584	-0.47875
Zm00001eb322600	306	-1.27576	0.42467	-3.00412	0.00266351	0.00948144	TRUE	2.06668	0.324517	0.124364	-0.52073	-0.614575	-0.632599	-0.747661
Zm00001eb348360	1489.38	-1.27516	0.252215	-5.05586	4.28452e-07	4.22998e-06	TRUE	0.868421	0.842179	1.4264	-0.66664	-0.761357	-0.760826	-0.948176
Zm00001eb300160	1493.47	-1.2734	0.279417	-4.55735	5.1803e-06	4.10976e-05	TRUE	0.509477	0.407323	1.47459	-1.2841	-1.22431	-0.29179	0.408806
Zm00001eb330790	1613.14	-1.2733	0.337584	-3.7718	0.000162077	0.000857219	TRUE	1.79542	0.088888	0.373611	-1.10147	-1.01947	-0.496889	0.359914
Zm00001eb203950	5253.41	-1.27323	0.332566	-3.8285	0.000128924	0.000703653	TRUE	1.0054	0.583215	1.28054	-0.870841	-1.05377	-1.0615	0.116963
Zm00001eb399270	1765.09	-1.27282	0.372768	-3.41451	0.000638963	0.00284574	TRUE	0.142708	0.74404	1.84823	-0.484532	-0.668429	-0.987409	-0.594604
Zm00001eb321610	1334.6	-1.27111	0.360337	-3.52757	0.000419397	0.00196796	TRUE	1.99376	-0.045301	0.327323	-0.938511	-0.899093	-0.474569	0.036387
Zm00001eb304290	81456.5	-1.27002	0.256022	-4.96059	7.0278e-07	6.65039e-06	TRUE	1.35935	0.279272	1.30436	-0.953201	-0.955504	-0.607613	-0.426664
Zm00001eb129000	552.448	-1.26862	0.286585	-4.42668	9.5695e-06	7.09584e-05	TRUE	1.40646	0.527117	1.1183	-1.03286	-0.868079	-0.502123	-0.648803
Zm00001eb041400	1756.43	-1.26802	0.314127	-4.03664	5.4223e-05	0.000328698	TRUE	1.8858	0.283796	0.620294	-0.678341	-0.82726	-0.574162	-0.710128
Zm00001eb063290	1309.05	-1.26786	0.281915	-4.49732	6.88161e-06	5.27937e-05	TRUE	0.630636	0.86026	1.50665	-0.988356	-0.933005	-0.826044	-0.250139
Zm00001eb032930	1246.82	-1.26729	0.286411	-4.42473	9.6563e-06	7.15272e-05	TRUE	1.33984	0.240047	1.37352	-0.936147	-0.807645	-0.619001	-0.590614
Zm00001eb085340	1931.72	-1.26713	0.407381	-3.11043	0.00186816	0.00703286	TRUE	2.17799	-0.109394	0.074028	-0.631402	-0.718046	-0.467677	-0.325497
Zm00001eb260490	4135.74	-1.26662	0.381762	-3.31782	0.000907245	0.00381764	TRUE	0.821598	0.518889	1.56897	-0.733308	-0.743295	-1.20494	-0.227919
Zm00001eb159810	652.54	-1.26604	0.290716	-4.3549	1.33127e-05	9.5278e-05	TRUE	-0.012963	0.946018	0.777362	-1.27195	-1.51405	0.615097	0.460484
Zm00001eb376780	1216.45	-1.26579	0.289414	-4.37362	1.22205e-05	8.83078e-05	TRUE	1.36144	0.28331	0.477172	-1.18552	-1.42376	-0.135278	0.622631
Zm00001eb156700	304.77	-1.26449	0.362542	-3.48785	0.000486922	0.00224399	TRUE	1.05404	1.01089	-0.019597	-1.25345	-1.2701	0.772067	-0.293853
Zm00001eb059190	220.073	-1.26367	0.397549	-3.17864	0.00147967	0.00577098	TRUE	0.33727	0.930523	1.4381	-0.821513	-1.33165	-0.69548	0.142746
Zm00001eb272660	6853.75	-1.26212	0.287534	-4.38948	1.13624e-05	8.2654e-05	TRUE	0.183279	0.908943	1.74343	-0.913817	-0.790452	-0.585848	-0.545531
Zm00001eb345280	1802.95	-1.26112	0.308287	-4.09072	4.30045e-05	0.000268612	TRUE	1.09136	1.09621	-0.051694	-1.17208	-1.28631	-0.350705	0.673213
Zm00001eb310830	16037.6	-1.2611	0.348692	-3.61666	0.000298434	0.00146329	TRUE	0.45996	0.449866	1.38484	-1.11301	-1.04602	-0.882104	0.746464
Zm00001eb293960	2700.99	-1.26075	0.332346	-3.79348	0.000148551	0.000793371	TRUE	-0.279963	1.02445	1.49795	-1.06543	-1.11124	-0.390714	0.324946
Zm00001eb373510	1124.05	-1.26061	0.325687	-3.87062	0.000108558	0.000602325	TRUE	0.594184	0.582045	1.65271	-0.43526	-0.234017	-1.09406	-1.06561
Zm00001eb008450	1019.56	-1.26039	0.317473	-3.97008	7.18485e-05	0.000419067	TRUE	0.27943	1.17573	1.44711	-1.09293	-0.736587	-0.278476	-0.794274
Zm00001eb037200	2908.22	-1.25996	0.316913	-3.97572	7.01667e-05	0.000411117	TRUE	1.36215	-0.314039	0.397111	-1.10045	-1.44005	0.504727	0.590543
Zm00001eb018350	1075.56	-1.2589	0.333602	-3.77367	0.000160865	0.000851761	TRUE	1.84215	0.249318	0.088659	-0.948708	-1.27823	0.050336	-0.003523
Zm00001eb295710	2024.18	-1.25873	0.304691	-4.13115	3.60955e-05	0.000231471	TRUE	1.5229	0.261522	0.459305	-1.27805	-1.12346	-0.417793	0.575579
Zm00001eb301540	2932.63	-1.25867	0.377054	-3.33818	0.000843301	0.00359334	TRUE	-0.103344	0.586171	1.96282	-0.779911	-0.743147	-0.782976	-0.13961
Zm00001eb083310	2311.13	-1.25812	0.236343	-5.32326	1.01921e-07	1.15384e-06	TRUE	0.205384	0.882537	0.775842	-1.3737	-1.47483	0.370038	0.614733
Zm00001eb300320	1230.94	-1.257	0.395079	-3.18164	0.00146444	0.00571945	TRUE	0.359361	-0.614441	-0.487488	-0.855652	-1.03015	1.25038	1.378
Zm00001eb295360	737.757	-1.25668	0.332337	-3.78133	0.000155991	0.000828116	TRUE	0.337318	1.47386	1.16127	-1.03714	-0.500214	-0.7875	-0.647591
Zm00001eb275030	131.476	-1.25658	0.400381	-3.13847	0.00169832	0.00646903	TRUE	1.10847	0.657222	1.34658	-0.706736	-1.03636	-0.597285	-0.771895
Zm00001eb231230	287.947	-1.25469	0.387982	-3.23389	0.00122118	0.00492536	TRUE	1.43375	0.041052	1.04926	-0.893628	-1.25488	-0.633823	0.258271
Zm00001eb288750	1180.5	-1.25446	0.32028	-3.91678	8.97411e-05	0.000510007	TRUE	0.756712	0.986884	1.33919	-0.513382	-0.551764	-1.177	-0.840643
Zm00001eb237810	2327.2	-1.25372	0.307286	-4.07999	4.50379e-05	0.000278529	TRUE	0.26905	-0.098262	0.6788	-1.15681	-1.3195	0.087147	1.53958
Zm00001eb400580	4149.46	-1.2532	0.32683	-3.83441	0.000125865	0.000689076	TRUE	0.343889	0.969367	1.56868	-0.816617	-0.870248	-1.01167	-0.183411
Zm00001eb286070	466.622	-1.24966	0.293431	-4.25877	2.05556e-05	0.000140724	TRUE	1.20999	0.586193	1.31107	-0.735351	-0.599751	-0.922616	-0.849541
Zm00001eb177440	2531.93	-1.2494	0.312372	-3.99972	6.34165e-05	0.000376618	TRUE	0.614576	0.935754	1.48744	-0.978384	-0.555464	-1.01419	-0.489722
Zm00001eb355750	261.69	-1.24928	0.344391	-3.62751	0.000286162	0.00141156	TRUE	1.22852	0.474846	0.996108	-1.23107	-1.18501	-0.537357	0.253956
Zm00001eb273330	1588.25	-1.24893	0.334421	-3.7346	0.000188016	0.000975495	TRUE	0.764679	0.566902	1.37173	-1.06887	-1.01596	-0.959747	0.341265
Zm00001eb009110	3205.46	-1.24856	0.298395	-4.18425	2.86108e-05	0.000188796	TRUE	1.49285	0.464426	1.04489	-0.921054	-0.719878	-0.972908	-0.388325
Zm00001eb337610	890.211	-1.24855	0.355876	-3.50839	0.000450826	0.00209808	TRUE	1.89464	0.196516	0.627872	-0.734829	-0.721873	-0.87581	-0.386513
Zm00001eb353840	4643.37	-1.24851	0.412585	-3.02605	0.00247769	0.00893618	TRUE	-0.618302	0.560836	1.95083	-0.903973	-0.794893	-0.218669	0.02417
Zm00001eb000320	1253.41	-1.24725	0.403937	-3.08773	0.00201691	0.0075131	TRUE	2.15188	0.174884	-0.208699	-0.776639	-0.694377	-0.306206	-0.340846
Zm00001eb404320	2732.19	-1.24718	0.275311	-4.53008	5.89623e-06	4.60815e-05	TRUE	1.64316	0.607146	0.699586	-0.495915	-0.463476	-0.985821	-1.00468
Zm00001eb311910	404.065	-1.24625	0.321172	-3.88031	0.000104323	0.00058238	TRUE	1.43872	0.412816	1.18612	-0.668602	-0.894647	-0.833206	-0.6412
Zm00001eb387500	272.087	-1.24612	0.391206	-3.18532	0.00144592	0.00566069	TRUE	0.590446	0.370625	1.69135	-0.949669	-1.02577	0.146343	-0.82332
Zm00001eb000700	3700.08	-1.24605	0.325413	-3.82915	0.000128588	0.000702356	TRUE	1.41365	-0.03753	0.128618	-1.34349	-1.08124	-0.081488	1.00148
Zm00001eb027670	1947.09	-1.24584	0.351685	-3.5425	0.000396355	0.00187347	TRUE	0.5908	0.734421	1.61624	-0.74539	-0.747185	-1.13421	-0.314677
Zm00001eb247020	860.465	-1.24541	0.262451	-4.74533	2.0817e-06	1.79181e-05	TRUE	0.768449	0.861622	1.48976	-0.743565	-0.863879	-0.706752	-0.805633
Zm00001eb007170	214.055	-1.244	0.358589	-3.46914	0.00052212	0.00238989	TRUE	0.770627	0.343786	1.12898	-1.48679	-1.20755	0.574008	-0.123059
Zm00001eb110760	1464.71	-1.24367	0.270079	-4.60483	4.12798e-06	3.32951e-05	TRUE	0.602614	1.11235	1.37163	-0.928196	-0.811031	-0.4602	-0.887166
Zm00001eb431140	1263.6	-1.24338	0.282883	-4.39538	1.10581e-05	8.08554e-05	TRUE	0.241022	0.08586	0.25351	-1.12068	-1.49055	0.608931	1.4219
Zm00001eb093730	2533.66	-1.24331	0.26991	-4.60638	4.09731e-06	3.30981e-05	TRUE	1.32119	0.254323	1.23285	-1.22144	-0.971303	-0.457845	-0.157772
Zm00001eb361940	1411.86	-1.24308	0.386026	-3.22019	0.00128107	0.0051232	TRUE	1.99448	-0.061315	0.573538	-0.600806	-0.726757	-0.81872	-0.360419
Zm00001eb319770	473.121	-1.24265	0.371191	-3.34773	0.00081476	0.00349588	TRUE	1.72723	0.285802	0.694247	-1.03426	-0.790828	-0.011683	-0.870508
Zm00001eb402280	278.184	-1.24083	0.409329	-3.03137	0.00243443	0.0088128	TRUE	0.937814	-0.349436	0.17499	-1.16694	-1.14378	1.51551	0.031836
Zm00001eb030890	1308.76	-1.24048	0.313871	-3.95219	7.74405e-05	0.000447999	TRUE	1.37884	0.400412	0.458054	-1.20053	-1.21478	-0.541816	0.71982
Zm00001eb141460	498.411	-1.24024	0.292148	-4.24524	2.1836e-05	0.000148558	TRUE	0.278097	1.02811	0.191796	-1.40959	-1.38941	0.831016	0.469983
Zm00001eb270230	246.31	-1.24014	0.404327	-3.06718	0.00216089	0.00795953	TRUE	1.19944	0.495167	1.32935	-0.707466	-0.749077	-0.423875	-1.14354
Zm00001eb079750	578.16	-1.23983	0.296991	-4.17465	2.98448e-05	0.000196358	TRUE	1.42989	0.478081	1.14261	-0.663863	-0.569118	-0.958097	-0.859502
Zm00001eb318870	987.253	-1.23897	0.35458	-3.49419	0.000475497	0.00219776	TRUE	0.352014	1.14207	1.44742	-0.724429	-0.799498	-1.1012	-0.316383
Zm00001eb260190	609.78	-1.23763	0.403038	-3.07074	0.0021353	0.00788576	TRUE	-0.208362	1.88169	0.816757	-0.7754	-0.694966	-0.240984	-0.778737
Zm00001eb212550	5919.89	-1.2367	0.340056	-3.63676	0.000276093	0.00136745	TRUE	1.81005	0.299456	0.598004	-0.452524	-0.250941	-1.01897	-0.985073
Zm00001eb227780	1127.93	-1.2358	0.361715	-3.4165	0.000634306	0.00282766	TRUE	-0.099176	0.877494	1.79763	-0.822588	-0.834638	-0.770313	-0.148414
Zm00001eb344260	2457.42	-1.23569	0.366831	-3.36855	0.000755659	0.00328401	TRUE	0.193854	0.529111	1.89217	-0.814051	-0.733034	-0.941318	-0.126731
Zm00001eb205410	1290.38	-1.23514	0.280812	-4.39846	1.09021e-05	7.9879e-05	TRUE	-0.384404	-0.304594	0.049263	-1.01983	-0.994436	1.00588	1.64811
Zm00001eb049950	502.715	-1.23501	0.332096	-3.71883	0.000200145	0.00102899	TRUE	0.348697	0.341167	1.39414	-1.20228	-1.30393	-0.329054	0.751255
Zm00001eb175630	3500.33	-1.23479	0.386282	-3.1966	0.00139059	0.00548236	TRUE	-0.353697	0.969648	1.84084	-0.665243	-0.665282	-0.678476	-0.447789
Zm00001eb357440	569.029	-1.23403	0.412847	-2.98907	0.00279826	0.00986905	TRUE	1.70815	0.117809	0.01039	-1.18188	-0.848742	-0.58557	0.77984
Zm00001eb040970	488.563	-1.23379	0.308226	-4.00287	6.25789e-05	0.000372819	TRUE	0.458556	0.898216	1.40439	-1.22227	-1.08815	-0.56524	0.114495
Zm00001eb418970	1402.65	-1.23378	0.294489	-4.18957	2.7948e-05	0.000185328	TRUE	1.53551	0.759974	0.670686	-0.281408	-0.598456	-1.01944	-1.06687
Zm00001eb102720	1147.18	-1.23275	0.296453	-4.15833	3.20588e-05	0.000208794	TRUE	1.06685	0.088283	0.164349	-1.16622	-1.527	0.37731	0.996427
Zm00001eb280090	7742.74	-1.23259	0.311853	-3.95245	7.73552e-05	0.000447688	TRUE	0.463496	-0.185825	-0.218995	-1.05332	-1.13527	0.345184	1.78472
Zm00001eb117230	787.512	-1.23162	0.289482	-4.25458	2.09441e-05	0.000142902	TRUE	1.35066	0.698476	1.06843	-0.750017	-0.864921	-0.982344	-0.520283
Zm00001eb130270	714.527	-1.23074	0.31266	-3.93635	8.27316e-05	0.000474544	TRUE	1.19135	0.203858	1.54196	-0.76771	-0.677393	-0.754323	-0.737737
Zm00001eb062340	248.634	-1.23069	0.385886	-3.18925	0.00142643	0.00559257	TRUE	1.94478	0.256854	0.419032	-0.998497	-0.800208	-0.387064	-0.434894
Zm00001eb188040	5670.41	-1.22967	0.36625	-3.35746	0.000786621	0.00339569	TRUE	1.06269	-0.186618	-0.36183	-1.04782	-1.09818	0.084554	1.54721
Zm00001eb406820	1827.15	-1.22925	0.262405	-4.68455	2.80577e-06	2.34946e-05	TRUE	0.522868	0.693861	1.04038	-1.4045	-1.27917	-0.267802	0.694363
Zm00001eb251590	2026.93	-1.22917	0.33658	-3.65194	0.000260266	0.00130225	TRUE	0.157907	0.849159	1.78998	-0.780887	-0.472581	-0.658807	-0.884771
Zm00001eb420350	603.209	-1.22803	0.340041	-3.61142	0.00030452	0.00149004	TRUE	0.838916	-0.294971	0.097745	-1.15764	-1.28032	0.347227	1.44905
Zm00001eb378430	628.544	-1.22778	0.390265	-3.14602	0.00165511	0.00633065	TRUE	-0.273969	1.31825	1.45092	-0.986172	-0.756161	-0.732985	-0.019887
Zm00001eb143240	5998.04	-1.22728	0.300139	-4.08904	4.33168e-05	0.000270087	TRUE	1.74687	0.224286	0.894564	-0.760132	-0.693656	-0.851171	-0.560759
Zm00001eb360130	1534.3	-1.22725	0.306993	-3.99765	6.39741e-05	0.000379537	TRUE	1.69258	0.252243	0.954427	-0.853644	-0.648233	-0.831689	-0.565683
Zm00001eb162670	443.904	-1.22651	0.299227	-4.09894	4.15041e-05	0.000260965	TRUE	0.707394	0.483369	0.96303	-1.17214	-1.65446	0.359185	0.313622
Zm00001eb287440	397.576	-1.22588	0.333344	-3.67754	0.000235498	0.00119092	TRUE	0.646397	0.130194	0.952161	-1.14444	-1.56725	0.943969	0.03897
Zm00001eb147200	418.953	-1.2256	0.33971	-3.60779	0.000308817	0.00150535	TRUE	-0.027673	0.448153	1.13064	-1.12986	-1.52904	0.171826	0.935944
Zm00001eb301040	555.423	-1.22527	0.297553	-4.11782	3.82477e-05	0.000243075	TRUE	1.41867	0.249277	1.15818	-1.02472	-1.14875	-0.301703	-0.350954
Zm00001eb208070	376.351	-1.22497	0.363728	-3.36783	0.000757626	0.00329055	TRUE	0.543054	0.737523	1.3323	-1.17982	-1.03973	-0.843105	0.449771
Zm00001eb101380	956.694	-1.22488	0.295119	-4.15046	3.31805e-05	0.000214719	TRUE	0.907823	1.24225	0.453285	-0.957986	-1.56426	0.131609	-0.212723
Zm00001eb232310	3608.66	-1.2245	0.218878	-5.59443	2.21344e-08	2.80086e-07	TRUE	1.13852	0.804972	1.22247	-0.71508	-0.639895	-0.923989	-0.887006
Zm00001eb347720	2594.73	-1.22209	0.320242	-3.81615	0.000135548	0.000732753	TRUE	0.095119	1.14936	1.59359	-0.750939	-0.770944	-0.427914	-0.88827
Zm00001eb320490	2413.66	-1.22192	0.299517	-4.07965	4.51043e-05	0.000278782	TRUE	0.825928	0.749858	1.28499	-1.01781	-1.08752	-0.925617	0.17017
Zm00001eb244080	253.316	-1.22088	0.392711	-3.10885	0.00187816	0.00706303	TRUE	-0.486803	0.401604	0.403706	-1.41927	-1.0269	1.29453	0.833132
Zm00001eb424890	2596.46	-1.22079	0.268726	-4.54288	5.5492e-06	4.37065e-05	TRUE	0.711912	0.780945	1.43836	-1.02647	-1.07534	-0.775599	-0.053813
Zm00001eb066310	145.519	-1.21999	0.395372	-3.08567	0.00203092	0.00755536	TRUE	1.29646	0.315801	1.20424	-1.00801	-1.24396	-0.434587	-0.129953
Zm00001eb326640	2340.98	-1.21848	0.307136	-3.96724	7.27083e-05	0.000423908	TRUE	-0.195276	0.712463	1.57335	-1.29231	-1.09833	-0.019363	0.319464
Zm00001eb005690	1146.89	-1.21813	0.33492	-3.63707	0.000275757	0.00136695	TRUE	0.855681	0.515879	1.60756	-0.546538	-0.616503	-1.1197	-0.696372
Zm00001eb126080	3313.2	-1.21729	0.268775	-4.52901	5.92606e-06	4.62637e-05	TRUE	0.302823	0.956743	1.55952	-1.21688	-0.913917	-0.407072	-0.281213
Zm00001eb232320	2799.09	-1.21648	0.32923	-3.69493	0.000219951	0.0011215	TRUE	1.1571	0.517757	1.15898	-0.927731	-1.02577	-1.05231	0.171966
Zm00001eb070400	13289.8	-1.21644	0.237292	-5.12636	2.95398e-07	3.02325e-06	TRUE	1.01677	0.531194	1.46448	-0.968504	-1.02181	-0.379099	-0.643031
Zm00001eb135050	6548.09	-1.21644	0.283891	-4.28489	1.82833e-05	0.000127251	TRUE	-0.047585	0.648407	0.126678	-1.31309	-1.18543	0.228412	1.54261
Zm00001eb253090	2972.22	-1.21569	0.376061	-3.23268	0.00122634	0.00493815	TRUE	-0.498486	0.850122	1.7215	-0.825424	-1.10287	0.207848	-0.352688
Zm00001eb373600	1328.27	-1.21567	0.305034	-3.98536	6.73772e-05	0.000397069	TRUE	0.501497	0.718071	1.62712	-0.91739	-1.02075	-0.834466	-0.074079
Zm00001eb088390	528.425	-1.21496	0.324997	-3.73838	0.000185212	0.00096271	TRUE	1.12622	0.998699	0.802601	-1.38387	-0.792556	-0.011714	-0.739381
Zm00001eb169450	322.992	-1.21382	0.370147	-3.27929	0.0010407	0.00428095	TRUE	-0.415012	-0.228389	-0.480454	-0.771026	-0.915621	1.69026	1.12024
Zm00001eb226390	2124.51	-1.21293	0.23682	-5.12174	3.02724e-07	3.09153e-06	TRUE	1.04091	0.594877	1.33377	-1.02803	-1.20488	-0.324823	-0.411825
Zm00001eb243470	2786.28	-1.21226	0.364272	-3.3279	0.000875044	0.00370705	TRUE	0.368744	0.544185	1.72132	-1.07501	-0.69107	-0.979459	0.111283
Zm00001eb064830	2835.14	-1.20991	0.290885	-4.15939	3.19092e-05	0.000208011	TRUE	0.888239	0.758005	1.20544	-0.978921	-1.19373	-0.873161	0.194127
Zm00001eb257930	10626.4	-1.2097	0.367856	-3.28852	0.00100714	0.00417606	TRUE	-0.303692	0.605669	1.8594	-0.687585	-1.23323	0.054333	-0.294898
Zm00001eb288500	290.596	-1.20872	0.402349	-3.00416	0.00266315	0.00948144	TRUE	1.91048	0.241963	0.5223	-0.417416	-0.441667	-0.88448	-0.931182
Zm00001eb245170	1341.19	-1.20763	0.315589	-3.8266	0.000129928	0.00070831	TRUE	0.242594	0.611525	1.75981	-0.995079	-1.02027	0.061234	-0.659813
Zm00001eb308470	7421.35	-1.20647	0.278737	-4.32835	1.50228e-05	0.000106336	TRUE	1.18857	0.396153	1.38596	-0.949113	-0.865183	-0.88765	-0.26873
Zm00001eb395080	1432.23	-1.20632	0.297916	-4.04919	5.13949e-05	0.000312757	TRUE	0.421399	0.983848	1.55353	-0.957658	-0.791989	-0.892383	-0.316741
Zm00001eb210120	1136.48	-1.2057	0.337519	-3.57226	0.000353918	0.00169606	TRUE	0.481136	0.182283	0.005153	-1.13984	-1.16787	-0.110136	1.74928
Zm00001eb001830	1000.55	-1.20559	0.314827	-3.82939	0.000128464	0.000701949	TRUE	-0.05409	0.453974	1.71639	-1.24728	-1.11909	0.071936	0.178159
Zm00001eb216680	2385.63	-1.20518	0.243362	-4.95222	7.33727e-07	6.90638e-06	TRUE	0.915142	0.59571	1.43957	-1.09549	-1.08532	-0.209982	-0.559634
Zm00001eb159970	10832.3	-1.20369	0.381064	-3.15877	0.00158437	0.00610382	TRUE	2.07177	-0.157664	0.141374	-0.823956	-0.82827	-0.530778	0.127523
Zm00001eb359650	267.609	-1.20287	0.361586	-3.32663	0.000879015	0.00372093	TRUE	0.474018	0.942892	1.58885	-0.86034	-0.546812	-0.949057	-0.649551
Zm00001eb306930	984.232	-1.20145	0.32308	-3.71875	0.000200213	0.00102899	TRUE	-0.366291	0.417471	0.883255	-1.17933	-1.33091	0.284068	1.29174
Zm00001eb016170	385.096	-1.20093	0.365988	-3.28134	0.00103314	0.00425895	TRUE	-0.251626	0.624656	1.58765	-1.04837	-1.32025	-0.020207	0.428152
Zm00001eb064600	2439.31	-1.19949	0.285589	-4.20004	2.66865e-05	0.000177889	TRUE	0.464195	1.05884	1.50845	-0.739049	-0.704072	-0.999835	-0.588532
Zm00001eb187400	1928.51	-1.19938	0.27047	-4.43443	9.23159e-06	6.87763e-05	TRUE	0.422414	0.836187	1.68332	-0.927004	-0.869384	-0.666345	-0.479187
Zm00001eb365580	233.204	-1.19903	0.379744	-3.15747	0.00159146	0.00612836	TRUE	-0.254192	0.882317	1.01462	-1.51903	-1.12089	0.680822	0.316349
Zm00001eb385860	382.292	-1.19855	0.369581	-3.243	0.0011828	0.00479099	TRUE	0.030569	1.06313	1.6985	-0.797558	-0.567373	-0.77436	-0.652906
Zm00001eb053470	5639.48	-1.19844	0.301132	-3.97978	6.89803e-05	0.000405338	TRUE	0.748116	0.350902	0.596119	-1.14068	-1.40786	-0.384002	1.2374
Zm00001eb181550	535.823	-1.19783	0.375293	-3.19172	0.00141427	0.00555277	TRUE	1.19804	0.048433	-0.544176	-1.14299	-1.20089	0.529016	1.11257
Zm00001eb349870	1137.72	-1.19736	0.330037	-3.62795	0.000285679	0.00141001	TRUE	0.859073	0.650227	1.37952	-1.21865	-0.737297	-0.952382	0.019517
Zm00001eb189870	4070.51	-1.19725	0.400683	-2.98803	0.00280782	0.00989046	TRUE	2.04178	-0.059463	0.321603	-0.60339	-0.820127	-0.827457	-0.052945
Zm00001eb410250	376.452	-1.19724	0.364633	-3.28342	0.00102554	0.00423541	TRUE	0.832112	1.1698	1.07007	-0.919174	-0.742026	-1.15453	-0.256251
Zm00001eb418180	887.32	-1.19701	0.30087	-3.9785	6.93516e-05	0.000407182	TRUE	1.27277	0.540888	1.2458	-0.841134	-0.819716	-0.997628	-0.400977
Zm00001eb203600	1099.95	-1.19676	0.309631	-3.86512	0.000111033	0.000613559	TRUE	0.867153	0.200674	0.494217	-1.036	-1.75954	0.487355	0.746141
Zm00001eb149520	319.325	-1.19661	0.357177	-3.35019	0.000807557	0.00346812	TRUE	0.759904	0.419051	0.228239	-1.31371	-1.2619	1.35687	-0.188456
Zm00001eb203140	1276.58	-1.1966	0.308192	-3.88264	0.000103326	0.000577268	TRUE	0.229145	0.846786	1.77154	-0.821585	-0.751048	-0.779573	-0.495264
Zm00001eb078960	299.86	-1.19653	0.344222	-3.47604	0.000508877	0.00233379	TRUE	-0.130567	0.301127	0.739527	-1.4365	-1.20707	1.2682	0.465287
Zm00001eb404990	3748.28	-1.19485	0.290228	-4.11695	3.83912e-05	0.000243769	TRUE	1.74908	0.378741	0.724892	-0.920672	-0.840238	-0.793054	-0.298744
Zm00001eb108830	1347.33	-1.19435	0.388071	-3.07765	0.00208641	0.00773543	TRUE	1.91383	0.358933	0.403751	-0.281244	-0.814496	-0.953937	-0.626834
Zm00001eb357760	653.744	-1.1932	0.347549	-3.43317	0.000596571	0.00268476	TRUE	-0.032661	1.15609	1.65013	-0.783564	-0.633673	-0.723655	-0.632667
Zm00001eb378450	398.236	-1.19174	0.335851	-3.5484	0.000387576	0.0018381	TRUE	-0.368175	0.33144	0.324208	-1.14114	-1.29333	0.643518	1.50348
Zm00001eb175430	1054.46	-1.19114	0.389861	-3.05529	0.00224841	0.00823701	TRUE	-0.524276	0.86476	1.57262	-1.37772	-0.759286	0.064533	0.159368
Zm00001eb231860	1249.07	-1.19028	0.340888	-3.4917	0.000479964	0.00221768	TRUE	1.5268	0.303464	1.05661	-0.659115	-0.959299	-1.0223	-0.246159
Zm00001eb420390	635.373	-1.19003	0.353425	-3.36713	0.000759555	0.00329691	TRUE	1.77099	0.269578	0.431493	-1.40202	-0.733491	-0.317351	-0.019195
Zm00001eb286850	1282.89	-1.18895	0.27042	-4.39668	1.09921e-05	8.04554e-05	TRUE	0.601233	0.872968	1.543	-0.917167	-0.94564	-0.793826	-0.360569
Zm00001eb187910	1173.85	-1.18626	0.3962	-2.99409	0.00275269	0.00974954	TRUE	-0.466389	0.472002	0.846241	-1.67212	-0.813701	0.658031	0.975939
Zm00001eb207820	1553.94	-1.18565	0.394194	-3.00778	0.00263168	0.00939517	TRUE	2.10578	0.088676	0.21656	-0.546072	-0.482008	-0.8013	-0.581639
Zm00001eb312220	939.027	-1.18543	0.285765	-4.14825	3.35028e-05	0.000216608	TRUE	1.00917	0.685357	1.40874	-0.897214	-0.506349	-0.953428	-0.74627
Zm00001eb092730	350.703	-1.1853	0.298034	-3.97705	6.97753e-05	0.000409156	TRUE	1.13638	0.840708	1.1786	-0.776975	-0.506611	-0.933419	-0.938687
Zm00001eb149540	6355.84	-1.18506	0.356601	-3.3232	0.000889897	0.00375914	TRUE	1.87151	-0.02066	0.487705	-0.802742	-1.00768	-0.74359	0.215461
Zm00001eb320790	933.142	-1.1841	0.3443	-3.43916	0.000583513	0.00263184	TRUE	1.16629	0.087699	1.47336	-0.832595	-0.988401	-0.889304	-0.017043
Zm00001eb426990	2229.02	-1.18342	0.345508	-3.42515	0.000614456	0.00275302	TRUE	1.81689	0.15996	0.34177	-0.954916	-1.01324	-0.702775	0.352309
Zm00001eb070760	1729.86	-1.18313	0.314051	-3.76732	0.000165007	0.000870123	TRUE	0.181209	0.179818	1.88248	-1.02086	-1.14881	-0.151897	0.07806
Zm00001eb329200	384.458	-1.18304	0.374017	-3.16307	0.00156117	0.006044	TRUE	-0.576801	0.394269	0.881976	-1.09914	-1.3595	0.624419	1.13478
Zm00001eb211130	4782.99	-1.18226	0.394281	-2.99852	0.00271292	0.00962792	TRUE	1.8417	0.042895	0.652192	-0.735521	-0.735107	-1.04845	-0.017712
Zm00001eb119170	2167.4	-1.18196	0.289803	-4.07849	4.53285e-05	0.000279437	TRUE	0.604606	0.977585	1.47306	-1.08302	-0.501003	-0.698973	-0.772259
Zm00001eb183560	377.922	-1.18019	0.36931	-3.19565	0.00139516	0.00549428	TRUE	0.6867	0.303298	1.81557	-0.959189	-0.566281	-0.840189	-0.439911
Zm00001eb244530	951.461	-1.17997	0.302579	-3.8997	9.63111e-05	0.000542778	TRUE	0.720634	-0.17044	0.501813	-1.14022	-1.51955	0.417747	1.19002
Zm00001eb106830	245.092	-1.17898	0.37172	-3.17168	0.00151559	0.00589489	TRUE	0.444318	0.257493	-0.517367	-1.23351	-1.18606	0.971945	1.26319
Zm00001eb233020	497.327	-1.17741	0.350806	-3.35629	0.000789946	0.00340796	TRUE	0.739945	1.47468	0.837311	-0.833208	-0.473937	-0.611925	-1.13287
Zm00001eb427580	694.897	-1.17699	0.330263	-3.56381	0.00036551	0.00174512	TRUE	-0.07406	0.891897	0.195801	-1.19943	-1.28454	1.43911	0.03122
Zm00001eb337940	761.45	-1.17651	0.258299	-4.55484	5.24265e-06	4.15458e-05	TRUE	0.824253	1.15697	1.19313	-0.860382	-0.642976	-0.901341	-0.769656
Zm00001eb239790	6713.13	-1.1763	0.31348	-3.75239	0.00017516	0.000915336	TRUE	1.14609	0.39919	0.960246	-1.21761	-1.02848	-0.847722	0.588281
Zm00001eb322610	984.003	-1.17566	0.305079	-3.85363	0.000116379	0.000640852	TRUE	0.15256	1.0022	1.68359	-0.816477	-0.914976	-0.450015	-0.656887
Zm00001eb251380	999.073	-1.17411	0.361959	-3.24377	0.00117961	0.00478296	TRUE	-0.677619	0.96105	0.899359	-1.3042	-1.08952	0.299516	0.911413
Zm00001eb115650	2106.02	-1.17394	0.275724	-4.25767	2.06567e-05	0.00014128	TRUE	1.53134	0.202477	0.224384	-1.24711	-1.34373	0.279997	0.352637
Zm00001eb009490	268.218	-1.17394	0.347239	-3.38078	0.000722808	0.00316256	TRUE	0.59998	0.246602	0.527109	-1.14728	-1.62712	0.278105	1.12261
Zm00001eb006360	1315.02	-1.17389	0.273688	-4.28916	1.79348e-05	0.000125015	TRUE	0.766477	0.540698	1.48133	-1.14501	-1.1136	0.077308	-0.607204
Zm00001eb149860	2574.72	-1.17308	0.369035	-3.17878	0.00147898	0.00577098	TRUE	-0.124449	1.01833	1.74981	-0.882084	-0.387381	-0.605637	-0.768594
Zm00001eb228040	988.887	-1.17286	0.307847	-3.80987	0.000139042	0.000749072	TRUE	0.117877	1.11476	1.62279	-0.895768	-0.758041	-0.67501	-0.526605
Zm00001eb366610	1462.57	-1.17201	0.322024	-3.63952	0.00027315	0.00135747	TRUE	0.29959	0.701988	1.74994	-0.832663	-0.961174	-0.852619	-0.105057
Zm00001eb378930	4609.77	-1.1714	0.353239	-3.31617	0.000912595	0.0038356	TRUE	1.29053	0.061752	0.145823	-0.985191	-1.26561	-0.476247	1.22893
Zm00001eb140740	295.897	-1.17027	0.329978	-3.5465	0.000390386	0.00184957	TRUE	0.576604	0.97455	1.046	-1.03696	-1.55328	-0.263917	0.257002
Zm00001eb346940	13265.5	-1.16978	0.296551	-3.94463	7.99245e-05	0.000460866	TRUE	1.61239	0.436937	0.914218	-0.732125	-0.784181	-1.01968	-0.427556
Zm00001eb133580	1535.92	-1.16922	0.237522	-4.92259	8.54077e-07	7.92353e-06	TRUE	1.21935	0.682974	1.24586	-0.710131	-0.738623	-0.831296	-0.868136
Zm00001eb011580	533.301	-1.16831	0.28322	-4.12512	3.70545e-05	0.000236658	TRUE	0.450071	0.022777	0.513095	-1.30054	-1.45513	0.60303	1.1667
Zm00001eb356170	5451.39	-1.16783	0.324568	-3.59811	0.000320535	0.00155499	TRUE	0.132392	0.829381	1.813	-0.510903	-0.680487	-0.914112	-0.669275
Zm00001eb346910	224.897	-1.1674	0.339387	-3.43972	0.000582315	0.00262727	TRUE	1.1707	0.848308	1.1468	-0.600971	-0.813187	-0.737808	-1.01384
Zm00001eb297300	1182.88	-1.16646	0.240691	-4.84628	1.25795e-06	1.12652e-05	TRUE	1.01783	0.808757	1.32816	-0.927166	-0.847936	-0.778115	-0.601528
[truncated: 12,209 more rows]

## Sheet: SupplementaryTable3
Supplementary Table 3. Common meiosis-related genes detected in temperate maize lines B73 and Mo17 and the tropical maize line CML228 male meiocytes. Values shown for each sample were Z-scores, indicating levels of gene expression.
										CML228			Mo17		B73
Gene Name	Gene ID	Enriched in GO analysis (CML228)	Base mean	log2(FC)	Std Err	Wald-Stats	P-value (unadjusted)	FDR	Diff exp?	SRR5930250	SRR14498235	SRR14498234	SRR5931453	SRR5931450	SRR650380	SRR650383
Atm1	Zm00001eb126710	-	3567.92	-0.542129	0.296037	-1.83129	0.0670573	0.134658	FALSE	0.148871	0.333874	1.98913	-0.184344	-0.470492	-0.950784	-0.866254
Zyp1	Zm00001eb423930	-	4229.34	-1.31243	0.227802	-5.76129	8.34759e-09	1.12131e-07	TRUE	1.40103	0.862	0.88843	-0.789255	-0.880474	-0.807388	-0.674341
Msh4	Zm00001eb105070	-	1771.87	-0.617409	0.306272	-2.01588	0.0438121	0.0956409	FALSE	1.07463	0.000206	1.60816	-0.576543	-0.306483	-1.22612	-0.573849
Dmc1	Zm00001eb163340	-	12548	-3.31958	0.435114	-7.62922	2.36182e-14	6.93632e-13	TRUE	0.102153	0.613115	1.44353	-1.12572	-1.16121	-0.609003	0.737127
Spo11	Zm00001eb214790	-	885.213	-0.988726	0.428905	-2.30524	0.0211533	0.0531124	FALSE	2.10412	-0.184016	-0.023673	-0.682577	-0.699349	-0.732078	0.217576
Mer3	Zm00001eb184840	-	3685.87	-1.55196	0.279685	-5.54895	2.87388e-08	3.56658e-07	TRUE	0.983966	0.149421	0.910681	-1.3208	-1.34609	-0.152128	0.774945
Zip4	Zm00001eb145140	Up	1676.27	-2.29664	0.44513	-5.15948	2.47633e-07	2.57717e-06	TRUE	-0.292395	1.12591	1.70975	-0.80945	-0.75313	-0.591055	-0.389634
Rad51a	Zm00001eb325310	-	251.96	0.380163	0.3366	1.12942	0.258721	0.385095	FALSE	-0.722775	-0.44053	-1.31851	-0.104259	1.33888	-0.070615	1.3178
Rad51b	Zm00001eb138190	-	328.909	-0.420129	0.312217	-1.34563	0.178421	0.288849	FALSE	0.991865	0.516867	1.32387	-1.00427	0.117357	-0.771299	-1.17439
Rad51c	Zm00001eb160270	-	496.872	-0.514936	0.38028	-1.3541	0.175706	0.285089	FALSE	1.72271	-0.118905	0.099195	-0.927099	-0.456446	-1.13169	0.812235
Rad51d	Zm00001eb329200	-	384.458	-1.18304	0.374017	-3.16307	0.00156117	0.006044	TRUE	-0.576801	0.394269	0.881976	-1.09914	-1.3595	0.624419	1.13478
Rad51e	Zm00001eb355220	-	223.507	-1.15272	0.372521	-3.09437	0.0019723	0.00736819	TRUE	0.7268	0.089166	1.29316	-1.35269	-1.18755	-0.263286	0.694398
Brca2	Zm00001eb419130	-	621.228	-1.15084	0.332559	-3.46055	0.000539081	0.00245801	TRUE	1.66933	0.352749	0.428197	-1.28739	-0.938377	-0.526032	0.301519
Tel2	Zm00001eb246300	-	1331.26	-0.613231	0.284627	-2.15451	0.0312006	0.0726791	FALSE	1.53937	-0.126239	0.654939	-1.10276	-1.06302	-0.59713	0.694834
Tti1	Zm00001eb224850	-	870.621	-0.389246	0.320989	-1.21264	0.225266	0.346836	FALSE	0.327637	0.469228	1.62468	-0.678351	-0.063076	-1.60077	-0.079355
Tti2	Zm00001eb226270	-	644.029	-1.45155	0.311109	-4.66573	3.07523e-06	2.54802e-05	TRUE	1.24331	0.333703	0.91175	-1.11955	-1.42474	-0.308918	0.364449
Mlh1	Zm00001eb362590	Up	582.314	-1.01987	0.363154	-2.80835	0.00497959	0.0161563	FALSE	1.18628	-0.111411	0.762982	-0.917388	-1.36283	-0.553876	0.996243
Mis12a	Zm00001eb433940	-	519.099	-0.307862	0.317058	-0.970995	0.331551	0.463857	FALSE	0.607941	0.698217	1.07884	0.225961	-1.00604	-1.70466	0.09975
Mis12b	Zm00001eb065850	Up	1698.01	-3.79689	0.368363	-10.3075	6.5195e-25	5.43995e-23	TRUE	0.290572	0.978016	1.63997	-0.894732	-0.933809	-0.623073	-0.456941
E2F-DP-transcription factor 212 (E2f12)	Zm00001eb280090	-	7742.74	-1.23259	0.311853	-3.95245	7.73552e-05	0.000447688	TRUE	0.463496	-0.185825	-0.218995	-1.05332	-1.13527	0.345184	1.78472
E2F-DP-transcription factor 213 (E2f13)	Zm00001eb194770	-	152.243	-1.92745	0.451468	-4.26929	1.96096e-05	0.000135359	TRUE	0.503019	0.756456	1.68684	-0.848692	-0.876287	-0.828979	-0.392359
Mre11	Zm00001eb069280	-	5340.78	-0.117282	0.302305	-0.38796	0.698045	0.787793	FALSE	-0.099384	-0.334003	0.035141	-0.838078	-0.146021	-0.757654	2.14
Rad50	Zm00001eb181120	-	1417.8	-0.221839	0.377743	-0.587276	0.557018	0.674173	FALSE	1.80867	-0.357147	-0.943358	0.205339	-0.977044	-0.451206	0.714741
Atr1	Zm00001eb228310	Down	1166.48	1.27656	0.283622	4.5009	6.76651e-06	5.2063e-05	TRUE	-1.12222	-0.932539	-0.632142	1.08806	1.43884	-0.239725	0.39973
Wee1	Zm00001eb209170	Down	562.011	1.56023	0.453068	3.44371	0.000573792	0.00259625	TRUE	-0.211074	-1.12753	-1.28629	1.37586	1.02275	-0.067084	0.293373
Rad1	Zm00001eb208390	Down	582.542	1.668	0.34354	4.85531	1.20198e-06	1.08049e-05	TRUE	-0.451073	-0.597584	-0.696117	2.01185	0.663055	-0.597523	-0.332609
Phr1	Zm00001eb015750	-	1365.52	0.702544	0.292179	2.4045	0.0161946	0.0425761	FALSE	-0.392622	-0.955333	-1.29714	0.915006	1.00769	-0.392788	1.11519
Mus81 homolog2	Zm00001eb141330	-	1907.18	0.968905	0.304097	3.18617	0.00144169	0.00564615	FALSE	-0.274766	-1.23788	-0.941082	1.0691	1.40535	-0.451013	0.43029
Smc3	Zm00001eb297550	-	2298.72	0.734716	0.275176	2.66998	0.00758552	0.0228937	FALSE	-0.995403	0.110011	-0.510916	1.44893	1.29007	-0.482982	-0.859706
CCS52A2	Zm00001eb403730	-	312.909	1.07747	0.405303	2.65842	0.00785073	0.0235539	FALSE	-0.882288	-0.104368	-0.83932	1.61129	1.00257	0.151229	-0.939114
MAP kinase 3 (Mpk3)	Zm00001eb013100	Down	178.428	2.62654	0.437889	5.99819	1.99535e-09	3.00149e-08	TRUE	-0.561322	-0.713713	-0.767283	1.30207	1.57569	-0.245041	-0.590402
MAP kinase 6 (Mpk6)	Zm00001eb417810	-	400.571	-0.400029	0.454849	-0.879477	0.379143	0.512253	FALSE	-1.35429	1.67433	0.466569	-0.446639	-0.636312	0.646427	-0.350088
Siamese-related1 (Smr1)	Zm00001eb148250	-	143.284	-0.722403	0.46316	-1.55973	0.118825	0.210928	FALSE	-0.130353	-0.508414	-0.482593	-0.876012	-0.657801	1.94668	0.708494
UVB resistance 8 (Uvr8)	Zm00001eb082500	-	900.485	-0.0611448	0.378718	-0.161452	0.871737	0.913332	FALSE	1.61511	-0.21704	0.044428	-0.163906	0.911134	-0.88526	-1.30446
Meiotic genes looked for but were not detected: Mlh3, Sog1, Mmd1, Asy1, Msh5, Hei10, Afd, e2f7 - E2F-DP-transcription factor 27, mkp1, smr1 - siamese-related1, and smr5.

## Sheet: SupplementaryTable4
Suppementary Table 4. Significantly differentially expressed genes in "cell cycle" gene ontology category: their expression levels (shown in Z-scores) and functions.
Gene name	Gene ID	CML228			Mo17		B73		Gene function/homolog function
		SRR5930250	SRR14498235	SRR14498234	SRR5931453	SRR5931450	SRR650380	SRR650383
Minichromosome maintenance 2 (Mcm2)	Zm00001eb137000	-0.519988	-0.465621	-0.393657	1.28743	1.59724	-0.842354	-0.663049	Cell cycle regulated by Tb1, Arabidopsis Mcm7, Mcm2/3/5 homologs
Cyclin-dependent kinase inhibitor 3 (Cki3)	Zm00001eb003110	-0.770752	-0.96149	-1.02052	0.590568	0.006496	1.6974	0.458304
Cyclin-dependent kinase inhibitor 1 (Cki1)	Zm00001eb046080	-1.42571	-0.617617	-0.90964	0.863931	0.851243	1.12948	0.108316
Pco124429	Zm00001eb065860	-1.38375	-0.427689	-0.627841	1.18514	1.42282	0.095844	-0.264525	Part of DNA replication complex GINS protein: partner of Sld five 1 (Psf1)
Cyclin 8 (Cyc8)	Zm00001eb073920	-1.13558	-0.471235	-0.928922	0.829379	1.71394	-0.001517	-0.006068	Mitotic cell cycle during maize endosperm development, CycB2
NA	Zm00001eb184500	-1.19352	-0.774793	-0.980805	0.902846	1.41339	0.307857	0.325026	Candidate gene regulating bulliform cell patterning, enhancer of rudimentary homolog, putative cell-cycle gene homolog
Cyclin 13 (Cyc13)	Zm00001eb193830	-1.2964	-0.529831	-0.867679	1.07487	0.992537	1.00211	-0.375604	CycD
Cyclin-dependent kinase inhibitor 2 (Cki2)	Zm00001eb221920	-1.04262	-0.56577	-0.872617	1.35859	1.34539	0.163009	-0.385977	Cki5
Cyclin dependent kinase 8 (Cdk8)	Zm00001eb225020	-1.19937	-0.770065	-1.00355	1.00471	1.12244	0.014038	0.831796	Mediate transcription initiation with RNA polymerase II, CdkC1
Cyclin 9 (Cyc9)	Zm00001eb227730	-0.877685	-0.440402	-1.102	1.33196	1.36625	0.127295	-0.405419	CycA2
Umc1462	Zm00001eb288670	-0.98872	-0.550807	-0.824786	1.06299	0.556887	1.44962	-0.705188	Patellin-1, membrane-trafficking events associated with cell plate formation during cytokinesis
Cyclin 1 (Cyc1)	Zm00001eb352410	-1.19606	-0.04971	-0.656458	1.27164	1.47008	-0.367508	-0.47198	Maturation of Xenopus stage VI oocytes, arrested in meiosis I, CycB1
Umc1107	Zm00001eb390180	-0.665459	-0.163935	-0.385012	1.00933	1.76909	-0.709378	-0.854638	Arabidopsis Patellin-4 homolog, Patellin-5
Cyclin-dependent kinase inhibitor 4 (Cki4)	Zm00001eb402760	-0.17878	-0.680651	-0.649101	1.2176	1.62355	-0.47006	-0.862556
Cyclin 26 (Cyc26)	Zm00001eb409420	-0.812792	-0.679724	-0.946136	0.436694	1.81827	-0.392151	0.575842	CycA2
Umc2595	Zm00001eb004170	-0.997985	-1.00814	-0.963096	1.14755	0.804207	-0.029259	1.04673	Cell division control protein 48 homolog D
Retinoblastoma family 3 (Rrb3)	Zm00001eb037120	-0.480107	-0.236064	-0.683103	1.40483	1.46979	-0.849383	-0.62597
Low phytic acid 3 (Lpa3)	Zm00001eb056480	-0.683786	-0.421081	-0.741893	1.88526	0.899035	-0.505901	-0.431636	Myo-inositol kinase
Idp6905	Zm00001eb104860	-0.216108	-0.3379	-0.453489	1.20576	1.59049	-1.05268	-0.736074
Rad1 DNA repair homolog (Rad1)	Zm00001eb208390	-0.451073	-0.597584	-0.696117	2.01185	0.663055	-0.597523	-0.332609
Wee1	Zm00001eb209170	-0.211074	-1.12753	-1.28629	1.37586	1.02275	-0.067084	0.293373	Probably reducing cell division
G2-like-transcription factor 10 (Glk10)	Zm00001eb227200	-1.0746	-0.360539	-0.936868	0.357257	1.31256	1.28398	-0.581787	Protein PHOSPHATE STARVATION RESPONSE 3 (per NCBI)
Atr1	Zm00001eb228310	-1.12222	-0.932539	-0.632142	1.08806	1.43884	-0.239725	0.39973	DNA damage response
Si606066c12	Zm00001eb266890	-0.685616	-0.565244	-0.572665	1.36355	1.55617	-0.567192	-0.529002	Small nuclear ribonucleoprotein Sm D2
Gamma-tubulin 3 (Tubg3)	Zm00001eb282720	-0.548029	-0.921857	-0.908649	1.36401	1.42971	-0.336875	-0.078307	Gamma-tubulin complex component 4
Idp1657a	Zm00001eb322350	-0.439951	-0.452261	-0.601353	1.03381	1.80511	-0.60899	-0.736362	Protein TPX2 (per NCBI)
Bik1-like kinase 3 (Blk3)	Zm00001eb355810	-1.08863	-0.588079	-0.977767	1.03857	0.415503	1.47806	-0.277651	Botrytis-induced kinase-like 3
Idp279	Zm00001eb369330	-0.658257	-0.545562	-0.593341	1.22007	1.67673	-0.471065	-0.628576	Stomatal closure-related actin-binding protein 1
Cl57132_1	Zm00001eb379890	-1.00739	-0.625222	-1.1014	1.00587	1.36523	-0.287437	0.650342	ARM repeat superfamily protein
Precocious dissociation of sisters-like 5 (Pds5)	Zm00001eb380840	-0.921666	-0.490455	-0.93958	1.4984	1.28758	-0.339232	-0.095046	Sister chromatid cohesion protein Pds5 homolog B
Pza03469	Zm00001eb381470	-1.24903	0.007329	-1.1696	1.2455	1.21221	0.135069	-0.181483	65-kDa microtubule-associated protein 1
Trihelix-transcription factor 43 (Thx43)	Zm00001eb415630	-0.410171	-1.11818	-0.933544	0.890326	0.417436	1.59613	-0.441998	Probable mixed-linked glucan synthase 6
Pco134590	Zm00001eb417890	-0.339516	-0.926814	-1.273	1.42952	1.15292	0.103988	-0.147107	~480 bp deletion is associated with a severe small kernel phenotype, Nop53 domain protein
NA	Zm00001eb215170	-0.364262	-0.498718	-1.02048	1.75848	0.980187	-0.146068	-0.709134	Cdk-activating kinase assembly factor-related
NA	Zm00001eb010100	-0.716465	-1.29632	-1.08138	0.618226	0.968938	0.453248	1.05375	CycJ18
NA	Zm00001eb048550	-0.977295	-0.929775	-0.980943	1.50117	0.905448	0.120395	0.361001	Ania-6a arginine-rich cyclin 1, Cyc1, confers tolerance to LiCl and NaCl when expressed in yeast
NA	Zm00001eb051450	-0.747976	-0.505429	-0.666273	0.997823	1.81945	-0.321801	-0.575797	CycD5, core cell cycle genes, a quantitative trait gene for endoreduplication
NA	Zm00001eb000540	-1.46788	-0.979614	-0.623632	0.820728	0.597774	0.602419	1.05021
NA	Zm00001eb040540	-0.327453	-0.831414	-1.01921	1.39549	1.4148	-0.232948	-0.399272
NA	Zm00001eb059360	-0.908544	-0.813523	-0.80808	0.372045	0.064551	1.92018	0.17337
NA	Zm00001eb097100	-0.681776	-1.27522	-1.05906	1.37279	0.542281	0.587048	0.51394
NA	Zm00001eb111000	-1.22928	-0.510689	-0.934637	0.645808	0.582808	1.604	-0.158003
NA	Zm00001eb114240	-0.883371	-0.793658	-0.976838	1.18412	1.49303	-0.05636	0.033076
NA	Zm00001eb123270	-0.638848	-0.972243	-0.980388	0.763634	1.25333	-0.539317	1.11384
NA	Zm00001eb184560	-0.861329	-0.388046	-0.564543	1.52974	1.34234	-0.320533	-0.73763
NA	Zm00001eb200940	-0.708414	-0.81964	-0.985413	1.13183	1.59669	-0.136936	-0.078112
NA	Zm00001eb228900	-0.469312	-0.810766	-0.857263	1.23818	1.60358	-0.484211	-0.220207
NA	Zm00001eb260560	-0.892669	-0.906957	-1.0887	0.62807	0.62714	1.54936	0.083764
NA	Zm00001eb309380	-0.916673	-0.856183	-1.25368	0.789404	1.26239	0.20179	0.772953
NA	Zm00001eb342630	-0.615433	-0.710177	-0.908713	1.16771	1.60391	0.055919	-0.593221
NA	Zm00001eb394760	-1.18427	-0.237598	-0.756417	0.8113	1.62173	0.441938	-0.696687

## Sheet: SupplementaryTable5
Supplementary Table 5. Genes that had a reads per kilobase million (RPKM) value greater than 2 of B73, Mo17, and CML228 meiocytes aligned to the B73 v5 reference genome. Values shown for each sample were Z-scores, indicating levels of gene expression.
								CML228			Mo17		B73
Gene ID	Base mean	log2(FC)	StdErr	Wald-Stats	P-value (unadjusted)	FDR	Diff exp?	SRR5930250	SRR14498235	SRR14498234	SRR5931453	SRR5931450	SRR650380	SRR650383
Zm00001eb439830	32.7497	-1.82772	0.716701	-2.55018	0.0107666	0.0373735	FALSE	-0.289875	1.3136	1.50952	-0.793382	-0.793382	-0.793382	-0.153092
Zm00001eb278850	39.6655	-1.78987	0.715124	-2.50289	0.0123185	0.0417885	FALSE	-0.415166	0.778235	1.94894	-0.342725	-0.56177	-0.70376	-0.70376
Zm00001eb205400	15.3071	-1.78957	0.723333	-2.47406	0.0133587	0.0444666	FALSE	-0.211922	1.11479	0.325092	-1.2214	-1.2214	1.27267	-0.057837
Zm00001eb016700	39.5337	-1.78683	0.715097	-2.49873	0.012464	0.0421746	FALSE	-0.415033	0.784745	1.94525	-0.342204	-0.562419	-0.705167	-0.705167
Zm00001eb085610	90.6199	-1.75708	0.693196	-2.53476	0.0112525	0.0388004	FALSE	-0.436171	-0.272395	-0.376266	-0.518974	-0.518974	2.24507	-0.122295
Zm00001eb338920	260.179	-1.74473	0.720249	-2.4224	NA	NA	FALSE	2.26257	-0.443761	-0.446601	-0.393463	-0.395315	-0.33112	-0.252313
Zm00001eb102540	97.4156	-1.74073	0.691677	-2.51668	0.0118468	0.0405049	FALSE	-0.422267	-0.328494	-0.33509	-0.501324	-0.501324	2.25213	-0.163628
Zm00001eb390670	102.124	-1.73636	0.696808	-2.49188	0.012707	0.0427949	FALSE	1.21871	0.865698	1.03422	-1.07611	-0.367753	-0.833936	-0.840826
Zm00001eb011930	3589.58	-1.68603	0.727233	-2.31841	0.0204269	0.0623334	FALSE	0.724017	-0.599171	0.437484	-0.824197	-0.804961	-0.697252	1.76408
Zm00001eb011180	80.7778	-1.67224	0.702186	-2.38148	0.0172433	0.054496	FALSE	0.009233	1.05611	1.44553	-0.739773	-1.3535	-0.614114	0.196516
Zm00001eb265340	104.148	-1.66907	0.677443	-2.46378	0.013748	0.0455119	FALSE	-0.114899	0.43859	1.01184	-1.60474	-0.988189	0.165892	1.0915
Zm00001eb427770	49.5372	-1.66191	0.719401	-2.31013	0.0208812	0.063428	FALSE	-0.656293	1.04965	1.74268	-0.951305	-0.582458	-0.351055	-0.251217
Zm00001eb264030	75.0768	-1.65584	0.712158	-2.32511	0.0200662	0.061555	FALSE	1.9523	-0.32279	0.233225	-0.666932	-1.07475	0.399205	-0.52026
Zm00001eb216580	112.999	-1.65434	0.656079	-2.52155	0.0116839	0.0400433	FALSE	1.66284	0.667646	0.639584	-0.500543	-0.580592	-1.00961	-0.879323
Zm00001eb267150	36.5466	-1.64114	0.71006	-2.31127	0.020818	0.0633198	FALSE	1.64727	0.709394	0.577115	-0.522079	-1.17794	-0.496439	-0.737316
Zm00001eb149140	45.4635	-1.63373	0.675302	-2.41925	0.0155525	0.0502963	FALSE	1.00778	0.803021	1.32325	-0.613027	-0.679967	-1.08728	-0.753783
Zm00001eb415350	128.406	-1.63224	0.703569	-2.31994	0.0203441	0.0621687	FALSE	1.39462	0.459656	1.07936	-0.577185	-1.29604	-0.757859	-0.302552
Zm00001eb262460	20.8139	-1.62834	0.726009	-2.24287	0.0249054	0.0731054	FALSE	1.04602	-0.143876	1.2376	-0.882328	-1.09678	0.744054	-0.904681
Zm00001eb221420	24	-1.62018	0.722946	-2.24108	0.0250206	0.073282	FALSE	1.93199	0.119833	0.621909	-0.808804	-0.539106	-0.808804	-0.517021
Zm00001eb232110	1491.48	-1.61604	0.725982	-2.226	0.026014	0.0755744	FALSE	0.032704	-0.07989	-0.081749	-1.04808	-1.01322	0.240071	1.95016
Zm00001eb115900	527.855	-1.61108	0.644493	-2.49977	0.0124274	0.0420813	FALSE	1.95367	-0.480936	-0.717821	-0.616668	-0.84614	0.142036	0.565858
Zm00001eb315200	113.158	-1.60966	0.649649	-2.47774	0.0132218	0.0441145	FALSE	-0.623608	0.704518	2.00256	-0.550884	-0.522065	-0.410534	-0.599982
Zm00001eb059600	29.0015	-1.60801	0.725015	-2.2179	0.0265614	0.0768012	FALSE	0.129217	0.194326	2.09086	-0.308014	-0.702131	-0.702131	-0.702131
Zm00001eb363640	21.8813	-1.59889	0.726048	-2.20218	0.0276526	0.0792362	FALSE	2.0378	0.338304	0.146926	-0.358818	-0.811764	-0.743553	-0.608896
Zm00001eb103650	186.379	-1.59437	0.708601	-2.25003	0.0244468	0.0719744	FALSE	-0.494996	0.84863	0.290613	-1.02864	-0.745962	1.72641	-0.596058
Zm00001eb038130	17.5992	-1.58425	0.715387	-2.21453	0.0267922	0.0773052	FALSE	1.5812	0.907259	-0.004958	-1.36718	-0.869824	-0.224522	-0.021973
Zm00001eb266090	40.1634	-1.5789	0.633879	-2.49086	0.0127435	0.0428945	FALSE	-0.248052	0.106642	0.152505	-1.4057	-1.00865	1.09513	1.30812
Zm00001eb394740	67.866	-1.57349	0.701726	-2.24232	0.024941	0.0731637	FALSE	-0.552845	0.2258	-0.476219	-0.638768	-0.663491	2.13714	-0.031614
Zm00001eb274480	35.6714	-1.56918	0.726484	-2.15996	0.0307757	0.0860696	FALSE	1.05874	0.544629	1.40965	-0.91802	-0.258955	-0.91802	-0.91802
Zm00001eb301610	700.755	-1.54749	0.60281	-2.56713	0.0102545	0.0360317	FALSE	-0.688499	0.35669	2.13079	-0.458702	-0.628022	-0.358809	-0.353446
Zm00001eb073000	157.028	-1.54746	0.605469	-2.5558	0.0105944	0.036934	FALSE	-0.554449	0.865326	1.79496	-0.597394	-0.863094	-0.77647	0.13112
Zm00001eb116960	128.821	-1.54567	0.720992	-2.1438	0.0320485	0.0888497	FALSE	-0.866945	0.554873	1.95548	-0.684831	-0.726333	0.099602	-0.331851
Zm00001eb192990	54.1941	-1.54383	0.622166	-2.48138	0.0130875	0.0437916	FALSE	-0.226453	0.603352	2.02409	-0.424549	-0.598804	-0.691694	-0.685938
Zm00001eb344360	63.2739	-1.53915	0.659664	-2.33324	0.0196357	0.0605373	FALSE	-0.333926	0.925796	1.83109	-0.405082	-0.348964	-0.834457	-0.834457
Zm00001eb380810	59.0527	-1.53144	0.715388	-2.14071	0.0322971	0.0893464	FALSE	-0.820111	1.2838	0.416039	-1.10847	-0.80803	1.25565	-0.218877
Zm00001eb067570	45.2901	-1.52098	0.654874	-2.32256	0.0202028	0.061852	FALSE	0.534906	-0.280568	-0.001737	-0.855803	-1.00603	1.94388	-0.334649
Zm00001eb031530	40.9816	-1.51656	0.710781	-2.13365	0.0328717	0.0906267	FALSE	-0.284721	1.17247	1.26242	-0.76378	-1.38086	-0.482556	0.47703
Zm00001eb294480	63.2208	-1.51487	0.699542	-2.16552	0.0303479	0.0852822	FALSE	-0.57309	0.659985	1.118	-0.912719	-1.4871	0.934832	0.260094
Zm00001eb164450	101.361	-1.51443	0.678215	-2.23296	0.0255516	0.0745096	FALSE	-0.24455	1.26577	1.53997	-0.703409	-0.157429	-0.824217	-0.876135
Zm00001eb441750	195.493	-1.5127	0.618053	-2.44753	0.0143841	0.047307	FALSE	-0.599492	0.460692	2.10613	-0.478249	-0.541971	-0.369593	-0.577518
Zm00001eb208610	28.279	-1.51033	0.725893	-2.08065	0.0374662	0.10027	FALSE	-0.630056	0.70941	1.91466	-0.5928	-0.92594	-0.474422	-0.000849
Zm00001eb433720	90.9387	-1.50974	0.72495	-2.08255	0.0372926	0.0999058	FALSE	1.20059	0.824942	1.03155	-0.165838	-0.96375	-0.96375	-0.96375
Zm00001eb012960	87.0598	-1.50323	0.702133	-2.14095	0.0322781	0.0893336	FALSE	0.63426	0.535363	1.5965	-0.609721	-1.46685	-0.32064	-0.368911
Zm00001eb354960	190.401	-1.50239	0.616173	-2.43826	0.0147581	0.0482307	FALSE	-0.696163	1.60142	1.29977	-0.638929	-0.480159	-0.414543	-0.671397
Zm00001eb066020	2082.71	-1.49764	0.631777	-2.37053	0.0177628	0.055811	FALSE	1.60169	-0.673135	0.085493	-0.872739	-0.568818	-0.734285	1.1618
Zm00001eb134460	76.6788	-1.48681	0.70313	-2.11456	0.0344673	0.0941076	FALSE	-0.836971	0.041448	1.29177	-1.24917	-0.858047	0.937399	0.673566
Zm00001eb216840	573.349	-1.46645	0.570045	-2.57251	0.0100963	0.035606	FALSE	0.950002	0.222354	0.858192	-1.13587	-0.721725	-1.20127	1.02831
Zm00001eb026330	353.007	-1.45415	0.581468	-2.50082	0.0123906	0.0419872	FALSE	-0.833629	1.78924	0.860757	-0.69485	-0.762225	0.162722	-0.522014
Zm00001eb221950	46.3436	-1.4494	0.712687	-2.03371	0.0419804	0.109004	FALSE	-0.713672	0.648505	2.0246	-0.559814	-0.501177	-0.487574	-0.410866
Zm00001eb341760	211.496	-1.44692	0.665961	-2.17268	0.0298047	0.0839904	FALSE	2.05032	0.097147	0.400063	-0.6556	-0.6556	-0.6556	-0.580734
Zm00001eb100000	95.3265	-1.44572	0.602987	-2.3976	0.0165029	0.0525967	FALSE	-0.006702	1.72408	0.820019	-0.457188	-1.15195	-0.023553	-0.90471
Zm00001eb017640	160.36	-1.44422	0.590394	-2.4462	0.0144372	0.0474482	FALSE	-0.511666	0.617578	0.875348	-1.3998	-0.744312	1.41839	-0.255534
Zm00001eb364140	165.474	-1.43839	0.626193	-2.29704	0.0216165	0.065206	FALSE	-0.362916	0.301343	-0.597711	-0.864848	-0.663018	2.05296	0.134183
Zm00001eb154150	37.5976	-1.43235	0.618968	-2.31409	0.0206629	0.0629507	FALSE	0.082071	1.54658	1.19969	-1.04042	-0.515557	-0.58935	-0.683011
Zm00001eb057010	493.027	-1.43034	0.726055	-1.97002	0.0488364	0.122393	FALSE	1.79341	-0.539265	-0.218466	-0.704193	-0.673024	-0.677162	1.0187
Zm00001eb013680	604.075	-1.41794	0.556921	-2.54603	0.0108954	0.0377504	FALSE	-0.764589	0.882759	0.879142	-0.907519	-0.831858	1.38896	-0.646892
Zm00001eb030260	167.523	-1.41172	0.551424	-2.56014	0.010463	0.0366059	FALSE	-0.368734	1.86475	0.919802	-0.430755	-0.612876	-0.548085	-0.824102
Zm00001eb387450	248.103	-1.4055	0.652037	-2.15555	0.0311188	0.0868468	FALSE	-0.393941	1.65116	1.11613	-0.917118	-0.252376	-0.25312	-0.950728
Zm00001eb371530	197.193	-1.40509	0.726102	-1.93512	0.0529755	0.129938	FALSE	1.324	-0.488536	-0.486737	-0.673367	-0.593356	-0.668963	1.58696
Zm00001eb077230	4017.25	-1.40296	0.562976	-2.49204	0.0127013	0.0427949	FALSE	-0.606796	1.19363	1.46328	-1.34604	-0.373458	0.007733	-0.338349
Zm00001eb092510	44.3099	-1.4015	0.726667	-1.92866	0.0537725	0.13134	FALSE	1.3746	0.428538	1.13125	-0.936586	-0.124627	-0.936586	-0.936586
Zm00001eb154890	178.622	-1.39984	0.565582	-2.47504	0.0133222	0.044387	FALSE	-0.484052	0.615114	1.96225	-0.954848	-0.485694	-0.029543	-0.623225
Zm00001eb282970	44.547	-1.39835	0.60461	-2.31281	0.0207333	0.0631135	FALSE	1.39766	0.715987	0.065588	-0.992666	-1.23649	0.737021	-0.687108
Zm00001eb106990	261.405	-1.39641	0.579109	-2.41131	0.0158953	0.0510424	FALSE	0.407414	0.618426	1.6467	-1.41193	-0.296773	-0.170614	-0.793223
Zm00001eb049040	143.382	-1.39522	0.65616	-2.12634	0.033475	0.0918389	FALSE	-0.469705	0.558804	1.72565	-1.10721	-0.468221	0.592886	-0.832209
Zm00001eb437350	116.881	-1.38541	0.714076	-1.94014	0.0523625	0.128977	FALSE	0.003143	-0.144693	-0.37945	-0.54349	-0.610441	2.20939	-0.534461
Zm00001eb436090	117.144	-1.38431	0.71409	-1.93857	0.0525538	0.129312	FALSE	0.001746	-0.145562	-0.37948	-0.542934	-0.609646	2.20981	-0.533937
Zm00001eb440330	117.144	-1.38431	0.71409	-1.93857	0.0525538	0.129312	FALSE	0.001746	-0.145562	-0.37948	-0.542934	-0.609646	2.20981	-0.533937
Zm00001eb440360	117.144	-1.38431	0.71409	-1.93857	0.0525538	0.129312	FALSE	0.001746	-0.145562	-0.37948	-0.542934	-0.609646	2.20981	-0.533937
Zm00001eb000060	193.937	-1.38414	0.557201	-2.48409	0.0129882	0.0435531	FALSE	2.16138	-0.288245	0.153089	-0.418456	-0.80212	-0.601425	-0.204222
Zm00001eb435500	117.275	-1.38377	0.714098	-1.93778	0.0526495	0.129496	FALSE	0.001051	-0.145994	-0.379495	-0.542658	-0.60925	2.21002	-0.533676
Zm00001eb368240	35.8395	-1.383	0.638879	-2.16472	0.030409	0.0854068	FALSE	0.613808	0.754968	1.59684	-1.00541	-0.463466	-0.467635	-1.0291
Zm00001eb070780	504.254	-1.3784	0.631029	-2.18436	0.0289356	0.0820303	FALSE	-0.452871	-0.548567	-0.597102	-0.643	-0.604221	1.81641	1.02935
Zm00001eb276320	96.9853	-1.37787	0.706541	-1.95017	0.051156	0.126749	FALSE	-0.755491	1.23893	0.977821	-1.39019	-0.724851	0.691852	-0.038078
Zm00001eb353240	35.3429	-1.37417	0.634368	-2.16621	0.0302951	0.0851597	FALSE	2.09804	0.342053	-0.009037	-0.565709	-0.642386	-0.593843	-0.629122
Zm00001eb359260	121.768	-1.37265	0.553981	-2.47779	0.0132197	0.0441145	FALSE	2.12879	0.083866	0.127797	-0.520811	-0.486717	-0.510932	-0.821997
Zm00001eb224160	313.143	-1.3708	0.569364	-2.40759	0.0160581	0.0514604	FALSE	-0.295769	0.299848	0.726701	-1.05717	-0.705001	1.77029	-0.738895
Zm00001eb429440	202.686	-1.36823	0.561301	-2.4376	0.0147851	0.0482854	FALSE	-0.38362	0.01152	0.034738	-0.680388	-0.845376	2.14365	-0.280519
Zm00001eb201600	293.248	-1.36348	0.616183	-2.21278	0.0269131	0.0775563	FALSE	-0.582909	-0.56943	-0.558492	-0.59203	-0.59203	1.18971	1.70518
Zm00001eb395530	165.51	-1.36264	0.530438	-2.5689	0.0102022	0.035902	FALSE	-0.037977	-0.330371	0.041997	-0.85199	-0.780173	2.12712	-0.16861
Zm00001eb200910	88.2942	-1.36176	0.624314	-2.18121	0.0291675	0.0825059	FALSE	-0.599484	1.58345	1.23653	-0.531514	-0.822125	-0.065854	-0.800994
Zm00001eb192840	103.752	-1.36146	0.677371	-2.00992	0.04444	0.113931	FALSE	-0.028809	-0.112053	-0.516748	-0.806639	-1.17553	1.00142	1.63836
Zm00001eb416190	684.645	-1.35996	0.529538	-2.5682	0.0102228	0.0359406	FALSE	-0.867774	1.69913	1.05937	-0.719083	-0.76336	-0.039057	-0.36923
Zm00001eb384020	57.2626	-1.35855	0.553329	-2.45524	0.0140792	0.0464433	FALSE	0.122079	0.496509	0.890943	-1.60002	-1.05825	0.024335	1.1244
Zm00001eb169260	30.9267	-1.35084	0.724755	-1.86386	0.0623411	0.146476	FALSE	-0.873061	0.542042	1.68277	-0.764557	-1.1394	0.079896	0.472312
Zm00001eb065100	622.666	-1.35015	0.549527	-2.45693	0.0140129	0.0462493	FALSE	-0.636294	1.17049	1.67525	-0.716296	-0.43277	-0.250872	-0.809511
Zm00001eb112710	74.8972	-1.34678	0.536538	-2.51013	0.0120688	0.0410981	FALSE	0.357313	1.01454	1.44562	-1.03871	-0.816513	-1.00297	0.040713
Zm00001eb045480	108.436	-1.34633	0.706088	-1.90675	0.0565532	0.136417	FALSE	0.922036	1.06692	1.05283	-1.24312	-0.178868	-0.726702	-0.893102
Zm00001eb017480	25.1531	-1.34419	0.684064	-1.96501	0.0494137	0.123541	FALSE	1.88856	0.266067	0.381482	-0.690704	-0.915163	-0.94976	0.01952
Zm00001eb275270	42.3378	-1.34262	0.682518	-1.96715	0.0491655	0.123019	FALSE	-0.315483	1.28946	0.193732	-0.947441	-0.822814	1.40672	-0.804175
Zm00001eb245180	320.387	-1.33561	0.577931	-2.31101	0.0208321	0.0633316	FALSE	-0.796655	0.801655	1.07869	-0.885287	-0.819197	1.28805	-0.667254
Zm00001eb058700	965.113	-1.33487	0.551652	-2.41976	0.0155306	0.0502534	FALSE	-0.652951	0.254952	2.03801	-0.475898	-0.861621	0.261386	-0.563882
Zm00001eb110260	28.97	-1.33179	0.726042	-1.83432	0.0666066	0.154007	FALSE	0.617871	1.41587	0.952544	-0.14861	-0.945891	-0.945891	-0.945891
Zm00001eb215520	1901.81	-1.33051	0.550689	-2.41609	0.015688	0.0505346	FALSE	-0.816054	1.38199	0.955225	-0.912529	-0.659409	0.813711	-0.76293
Zm00001eb018420	81.2574	-1.32494	0.562394	-2.35589	0.0184784	0.057613	FALSE	2.15919	-0.128328	-0.000725	-0.759073	-0.763508	-0.383181	-0.124374
Zm00001eb019460	97.8571	-1.3231	0.547552	-2.4164	0.015675	0.0505086	FALSE	-0.213528	0.94962	1.82388	-0.63329	-0.457781	-0.599124	-0.869778
Zm00001eb358790	507.173	-1.32215	0.655276	-2.0177	0.0436226	0.112299	FALSE	-0.781103	0.375053	2.11569	-0.379621	-0.575806	-0.296526	-0.457686
Zm00001eb159860	688.382	-1.32208	0.525261	-2.517	0.0118358	0.0404821	FALSE	-0.437499	0.992544	1.81095	-0.490517	-0.499949	-0.456095	-0.919429
Zm00001eb159850	688.253	-1.32154	0.525485	-2.51489	0.0119068	0.0406722	FALSE	-0.438771	0.992652	1.81096	-0.490242	-0.499673	-0.455824	-0.919105
Zm00001eb065270	49.3291	-1.32149	0.563655	-2.3445	0.0190526	0.0590872	FALSE	1.44431	0.467108	0.969158	-0.743791	-1.25466	-0.787497	-0.09463
Zm00001eb333720	55.0091	-1.31798	0.71282	-1.84897	0.0644618	0.150416	FALSE	1.18733	0.343296	1.33294	-0.353956	-1.36049	-0.746603	-0.402516
Zm00001eb295770	546.625	-1.31395	0.715233	-1.83709	NA	NA	FALSE	2.01459	-0.581547	-0.48374	-0.691584	-0.691584	-0.182143	0.616008
Zm00001eb209240	151.973	-1.31188	0.523908	-2.50402	0.012279	0.0416847	FALSE	0.994673	0.475099	1.1178	-0.572596	-1.43209	-0.993877	0.410989
Zm00001eb343870	157.671	-1.30832	0.508601	-2.57238	0.0101002	0.0356104	FALSE	1.0796	-0.277896	0.762769	-0.781319	-1.75549	0.55855	0.413787
Zm00001eb189990	117.282	-1.3037	0.67966	-1.91817	0.0550896	0.133751	FALSE	-0.845233	1.54655	1.32037	-0.548461	-0.549209	-0.215982	-0.708032
Zm00001eb301370	558.389	-1.30193	0.648784	-2.00672	0.0447793	0.114612	FALSE	-0.772801	0.346964	2.12717	-0.359857	-0.57136	-0.334838	-0.435279
Zm00001eb221280	1009.53	-1.28664	0.595207	-2.16167	0.0306439	0.0858424	FALSE	-0.872661	1.18828	1.47923	-0.766559	-0.542909	0.3222	-0.807573
Zm00001eb028920	115.548	-1.28604	0.674103	-1.90777	0.0564206	0.136199	FALSE	-0.8298	1.54475	1.33528	-0.525686	-0.530215	-0.284583	-0.709746
Zm00001eb137560	287.224	-1.28471	0.516962	-2.48512	0.0129507	0.0434587	FALSE	-0.558556	0.79089	1.9427	-0.440749	-0.825039	-0.447333	-0.461914
Zm00001eb180830	357.192	-1.28431	0.60657	-2.11733	0.0342315	0.0936009	FALSE	-0.52561	1.83871	0.89519	-0.807166	-0.123477	-0.467678	-0.809964
Zm00001eb004140	244.802	-1.28367	0.513501	-2.49984	0.0124249	0.0420803	FALSE	0.433411	-0.37252	-0.456586	-0.831726	-0.812529	0.011947	2.028
Zm00001eb288440	449.561	-1.28307	0.527696	-2.43145	0.0150386	0.0489672	FALSE	-0.413646	0.821178	1.81328	-0.681126	-0.66313	0.099659	-0.976211
Zm00001eb109550	82.7635	-1.28304	0.508014	-2.5256	0.0115501	0.0396652	FALSE	1.6203	0.223178	0.080404	-0.995863	-1.37214	-0.193419	0.637536
Zm00001eb093420	26.1602	-1.28253	0.642522	-1.99609	0.0459245	0.117029	FALSE	0.868092	1.92107	-0.557833	-0.557833	-0.557833	-0.557833	-0.557833
Zm00001eb153520	181.927	-1.28236	0.524686	-2.44404	0.0145236	0.0476818	FALSE	-0.850815	1.0078	1.11753	-0.922991	-1.12118	0.93549	-0.165832
Zm00001eb130990	68.5435	-1.28106	0.543333	-2.35778	0.0183845	0.0573873	FALSE	-0.030062	1.05835	1.687	-0.500332	-0.426331	-0.86818	-0.92044
Zm00001eb066050	117.173	-1.27824	0.695615	-1.83756	0.0661272	0.153253	FALSE	0.004589	0.562574	0.351693	-0.885126	-1.78318	1.05687	0.692575
Zm00001eb121710	54.8056	-1.27353	0.715524	-1.77985	0.0751001	0.168616	FALSE	0.198008	0.995896	1.57042	-0.282902	-1.28422	-0.76722	-0.429982
Zm00001eb436210	135.674	-1.27235	0.705981	-1.80225	0.0715063	0.162721	FALSE	-0.11943	-0.271089	-0.345386	-0.490975	-0.544753	2.24335	-0.471718
Zm00001eb436450	135.674	-1.27235	0.705981	-1.80225	0.0715063	0.162721	FALSE	-0.11943	-0.271089	-0.345386	-0.490975	-0.544753	2.24335	-0.471718
Zm00001eb043780	169.374	-1.27202	0.498119	-2.55365	0.0106599	0.0370725	FALSE	2.02782	0.475767	-0.003777	-0.54744	-0.526005	-0.897519	-0.528843
Zm00001eb335470	285.591	-1.27081	0.5462	-2.32664	0.0199842	0.0613539	FALSE	2.06073	-0.311315	-0.239559	-0.496404	-1.05335	0.368041	-0.328143
Zm00001eb436490	135.084	-1.26913	0.706365	-1.7967	0.072383	0.164156	FALSE	-0.11765	-0.270149	-0.344857	-0.491252	-0.545328	2.24301	-0.473772
Zm00001eb304420	79.2506	-1.26893	0.595017	-2.1326	0.0329578	0.0907836	FALSE	1.02197	-0.256385	-0.36952	-1.46568	-0.798565	0.600675	1.2675
Zm00001eb442210	195.867	-1.26841	0.715218	-1.77346	0.0761519	0.170522	FALSE	-0.344067	1.10933	1.62988	-0.334846	-1.22759	-0.536179	-0.29652
Zm00001eb147750	81.7279	-1.26783	0.625189	-2.02791	0.0425692	0.110149	FALSE	-0.349759	1.77058	1.03549	-0.447598	-0.502318	-0.549225	-0.957167
Zm00001eb436260	135.609	-1.26752	0.7064	-1.79434	0.0727594	0.164809	FALSE	-0.119145	-0.270782	-0.345067	-0.490635	-0.544405	2.24329	-0.473254
Zm00001eb075470	415.195	-1.26574	0.721807	-1.75357	0.079505	0.176051	FALSE	-0.826869	0.140659	1.0616	-0.882575	-0.882575	-0.212292	1.60205
Zm00001eb257070	166.902	-1.26405	0.575559	-2.19621	0.0280766	0.0801312	FALSE	-0.621825	1.58769	0.9985	-0.757294	-0.769395	0.427041	-0.864719
Zm00001eb441030	135.477	-1.26286	0.706536	-1.7874	0.0738734	0.166664	FALSE	-0.118577	-0.27018	-0.348243	-0.489985	-0.543744	2.24334	-0.472608
Zm00001eb161350	24.7805	-1.26068	0.706623	-1.78409	0.0744091	0.167508	FALSE	-0.892562	0.694353	1.21126	-1.2895	-0.860423	0.888337	0.24854
Zm00001eb436360	219.189	-1.25724	0.664215	-1.89282	0.0583825	0.139601	FALSE	0.021424	-0.174327	-0.421947	-0.516821	-0.642257	2.21014	-0.476215
Zm00001eb329500	1250.72	-1.25683	0.554244	-2.26765	0.0233504	0.0693485	FALSE	-0.633893	0.190871	1.12988	-1.07243	-0.587453	1.56274	-0.589708
Zm00001eb442170	245.653	-1.25432	0.697999	-1.79702	0.0723325	0.164108	FALSE	-0.176154	-0.23966	-0.372799	-0.475599	-0.508686	2.24954	-0.476638
Zm00001eb102650	48.7082	-1.25379	0.704895	-1.77869	0.0752899	0.16892	FALSE	-0.384839	0.694602	1.4996	-1.60784	-0.656821	0.212933	0.242362
Zm00001eb438050	216.969	-1.25247	0.663985	-1.88629	0.0592554	0.141146	FALSE	0.023057	-0.172368	-0.423642	-0.516858	-0.644044	2.20954	-0.475686
Zm00001eb438170	216.969	-1.25247	0.663985	-1.88629	0.0592554	0.141146	FALSE	0.023057	-0.172368	-0.423642	-0.516858	-0.644044	2.20954	-0.475686
Zm00001eb271020	192.541	-1.25143	0.502758	-2.48913	0.0128054	0.0430565	FALSE	-0.454986	0.808053	1.93201	-0.505654	-0.846457	-0.465547	-0.467416
Zm00001eb186790	87.3013	-1.25121	0.645325	-1.93889	0.0525145	0.129283	FALSE	-0.406519	1.02392	0.571889	-0.700818	-1.02041	1.44609	-0.914165
Zm00001eb367400	121.69	-1.25071	0.676386	-1.8491	0.0644432	0.150392	FALSE	-0.851223	1.51688	1.35151	-0.524051	-0.535679	-0.225749	-0.731689
Zm00001eb399650	390.227	-1.24955	0.500907	-2.49458	0.0126107	0.0425628	FALSE	0.023998	0.388728	1.80491	-0.769036	-0.818792	-1.06672	0.436908
Zm00001eb082370	210.494	-1.24636	0.485765	-2.56577	0.0102946	0.0361592	FALSE	-0.289446	-0.23365	1.75979	-1.27764	-0.806206	0.672175	0.174985
Zm00001eb062510	2380.77	-1.24519	0.51451	-2.42014	0.0155146	0.0502145	FALSE	-0.551188	1.21458	1.1182	-1.24601	-0.464111	0.738906	-0.810368
Zm00001eb442410	33.918	-1.24305	0.627357	-1.9814	0.047546	0.119981	FALSE	0.046659	0.655581	1.92627	-0.406317	-0.574606	-0.77382	-0.873766
Zm00001eb082870	659.205	-1.24143	0.526452	-2.35811	0.0183683	0.0573561	FALSE	2.08856	0.494904	-0.506087	-0.393559	-0.447232	-0.711576	-0.525007
Zm00001eb414300	31.1905	-1.24067	0.660093	-1.87954	0.0601708	0.14267	FALSE	1.43279	0.782635	0.712703	-0.025507	-0.886248	-0.946165	-1.07021
Zm00001eb014090	160.339	-1.23918	0.483299	-2.564	0.0103472	0.0363166	FALSE	2.10498	0.006626	0.268271	-0.484543	-0.832725	-0.577482	-0.485127
Zm00001eb372970	831.681	-1.23764	0.527703	-2.34534	0.0190097	0.0589985	FALSE	2.25278	-0.259342	-0.369023	-0.513993	-0.518228	-0.378136	-0.214056
Zm00001eb060820	60.7645	-1.23692	0.511528	-2.41809	0.0156023	0.0503637	FALSE	0.499086	0.774602	1.69059	-0.612713	-0.567375	-0.935751	-0.84844
Zm00001eb056370	156.153	-1.23675	0.587481	-2.10517	0.0352765	0.0957717	FALSE	-0.843112	0.572267	1.51263	-0.96553	-0.756744	0.965943	-0.485455
Zm00001eb413240	87.6465	-1.23631	0.717675	-1.72266	0.0849508	0.185355	FALSE	-0.543263	0.707476	1.87776	-1.12131	-0.343183	-0.027509	-0.549975
Zm00001eb020220	29.129	-1.23587	0.67786	-1.8232	0.0682734	0.156819	FALSE	1.90013	0.172655	0.374162	-0.519612	-1.015	-0.957818	0.045493
Zm00001eb321030	183.132	-1.23364	0.508827	-2.42447	0.0153306	0.0497271	FALSE	0.147206	0.706119	1.7997	-0.795091	-0.588719	-0.156796	-1.11242
Zm00001eb306040	222.716	-1.22807	0.553747	-2.21774	0.0265725	0.0768139	FALSE	-0.830263	1.2223	1.58957	-0.536551	-0.91092	-0.388728	-0.145407
Zm00001eb135460	208.825	-1.22756	0.582952	-2.10576	0.0352249	0.0956998	FALSE	-0.628623	1.02643	1.70704	-0.920304	-0.368777	-0.006884	-0.808882
Zm00001eb194700	86.62	-1.22553	0.522546	-2.34531	0.0190114	0.0589985	FALSE	0.124333	-0.319882	1.05694	-1.02827	-1.2586	1.45694	-0.031463
Zm00001eb434740	254.553	-1.22147	0.667502	-1.82991	0.0672629	0.155146	FALSE	-0.04056	-0.213224	-0.416312	-0.496056	-0.597033	2.22745	-0.464262
Zm00001eb219900	64.4495	-1.22107	0.50523	-2.41685	0.0156554	0.0505042	FALSE	1.41403	0.325826	1.24806	-0.49137	-0.729903	-0.851613	-0.915025
Zm00001eb217460	104.175	-1.22067	0.476711	-2.56061	0.010449	0.0365841	FALSE	1.33747	0.825184	0.850132	-0.763497	-0.972583	-1.11986	-0.156842
Zm00001eb088050	97.9414	-1.21942	0.495839	-2.45931	0.0139204	0.0459847	FALSE	-0.120844	0.167092	0.964328	-1.19916	-1.14642	-0.164414	1.49942
Zm00001eb391140	145.815	-1.21564	0.524233	-2.31889	0.0204009	0.0622897	FALSE	1.45592	0.175938	1.1951	-0.538537	-0.277743	-0.877815	-1.13286
Zm00001eb434290	976.914	-1.21279	0.507903	-2.38784	0.0169479	0.0537725	FALSE	2.22264	-0.350097	-0.154867	-0.521966	-0.578073	-0.549602	-0.068038
Zm00001eb144960	6148.31	-1.21278	0.700156	-1.73216	0.0832452	0.182511	FALSE	-0.448389	2.24016	-0.322795	-0.65992	-0.374818	-0.27276	-0.161473
Zm00001eb154370	763.478	-1.21172	0.557855	-2.1721	0.0298479	0.0840926	FALSE	-0.487313	0.074788	1.93074	-0.667068	-0.664856	0.656799	-0.843086
Zm00001eb438820	263.481	-1.21026	0.668866	-1.80942	0.0703855	0.16074	FALSE	-0.057575	-0.222933	-0.41488	-0.490249	-0.585687	2.23152	-0.4602
Zm00001eb318330	139.166	-1.20883	0.500378	-2.41582	0.0156996	0.0505461	FALSE	0.399682	1.00008	1.33288	-0.882425	-0.889527	-1.19872	0.238033
Zm00001eb049010	136.699	-1.20484	0.480822	-2.50579	0.0122179	0.0415227	FALSE	0.931095	0.833905	0.920588	-1.78617	-0.554405	-0.044242	-0.300774
Zm00001eb298620	245.079	-1.20335	0.522407	-2.30346	0.0212528	0.0643171	FALSE	-0.350936	1.65706	1.14951	-0.646525	-0.161652	-0.75875	-0.888706
Zm00001eb344730	78.046	-1.20206	0.632761	-1.89971	0.0574709	0.137934	FALSE	0.199463	0.231211	0.297287	-0.794797	-0.944178	1.88103	-0.870016
Zm00001eb234330	123.957	-1.2008	0.555537	-2.16151	0.0306557	0.0858439	FALSE	0.479247	0.448015	1.77063	-0.632193	-0.736976	-1.21614	-0.112582
Zm00001eb088220	166.318	-1.19865	0.667058	-1.79692	0.0723481	0.164116	FALSE	-0.082243	2.11315	-0.616983	-0.971843	-0.268635	-0.327002	0.153551
Zm00001eb285420	298.783	-1.19807	0.482519	-2.48294	0.0130302	0.0436549	FALSE	-0.736117	1.29959	0.640301	-1.06369	-0.934889	1.11779	-0.322978
Zm00001eb048870	2093.84	-1.19714	0.4839	-2.47394	0.0133631	0.0444666	FALSE	-0.540219	-0.081924	0.907861	-1.23468	-0.650086	1.70829	-0.109242
Zm00001eb208170	25.6499	-1.19632	0.714777	-1.6737	0.0941903	0.199834	FALSE	-0.478461	1.95723	0.736287	-0.200377	-0.700603	-0.700603	-0.613475
Zm00001eb284450	1140.64	-1.19563	0.514287	-2.32482	0.0200814	0.0615746	FALSE	-0.817061	1.39061	1.43451	-0.54329	-0.759496	-0.020895	-0.684375
Zm00001eb303980	2136.06	-1.19428	0.538243	-2.21885	0.0264969	0.0766668	FALSE	-0.79532	0.662701	1.66157	-0.904223	-0.556326	0.686224	-0.754625
Zm00001eb218070	536.597	-1.19289	0.475448	-2.50899	0.0121077	0.0411931	FALSE	-0.697626	0.65682	1.90897	-0.931156	-0.644715	-0.38312	0.090828
Zm00001eb125110	60.7895	-1.19206	0.727188	-1.63927	0.101156	0.210872	FALSE	0.022823	0.960943	1.64627	0.03347	-0.887835	-0.887835	-0.887835
Zm00001eb036440	3054.36	-1.19194	0.567143	-2.10165	0.0355835	0.0963933	FALSE	-0.778174	0.574112	1.99955	-0.558296	-0.481947	-0.722192	-0.033058
Zm00001eb035330	15.3126	-1.19172	0.709267	-1.68021	0.0929162	0.197803	FALSE	0.657644	-0.294266	-0.13271	-1.0158	-1.2389	0.360775	1.66326
Zm00001eb035040	765.23	-1.19003	0.466344	-2.55183	0.0107157	0.0372393	FALSE	1.93931	-0.130419	0.421301	-0.338294	-1.21528	-0.67319	-0.003428
Zm00001eb204540	1370.47	-1.1877	0.562202	-2.11258	0.0346369	0.09446	FALSE	-1.00528	1.48061	1.32557	-0.721529	-0.56713	-0.07363	-0.43862
Zm00001eb248020	1532.69	-1.18747	0.469734	-2.52796	0.0114727	0.039443	FALSE	-0.638523	1.03189	1.69693	-0.634635	-0.772828	-0.796818	0.113989
Zm00001eb397220	188.513	-1.18633	0.54667	-2.17011	0.0299988	0.0844668	FALSE	1.7237	0.071261	0.157577	-0.549462	-1.13407	-0.96358	0.694579
Zm00001eb369260	136.448	-1.18628	0.597385	-1.98579	0.0470572	0.11907	FALSE	0.051535	-0.325732	-0.134104	-0.995074	-0.602772	2.12277	-0.116622
Zm00001eb208180	108.926	-1.18495	0.726079	-1.63199	0.102682	0.213218	FALSE	-0.650993	1.84644	0.89831	-0.172386	-0.876378	-0.432589	-0.6124
Zm00001eb044280	254.212	-1.18447	0.50732	-2.33477	0.0195554	0.0603463	FALSE	2.15477	-0.16001	0.17786	-0.322943	-0.70491	-0.719518	-0.425249
Zm00001eb313350	228.511	-1.18406	0.488806	-2.42236	0.0154201	0.0499522	FALSE	-0.435482	0.97235	1.66877	-0.713588	-0.92204	0.243319	-0.813334
Zm00001eb337430	15.4893	-1.18406	0.691552	-1.71218	0.0868634	0.188229	FALSE	1.68964	0.365891	0.179897	-0.938505	-0.938505	-0.938505	0.58009
Zm00001eb156140	25.2876	-1.18359	0.645132	-1.83464	0.0665585	0.153941	FALSE	1.35673	1.02541	0.671108	-0.28502	-0.905127	-1.03491	-0.828188
Zm00001eb100800	271.816	-1.18038	0.62635	-1.88453	0.0594927	0.141507	FALSE	0.475542	-0.759149	-0.600799	-0.689027	-0.801716	1.85781	0.517344
Zm00001eb016200	146.471	-1.17954	0.525745	-2.24356	0.0248609	0.072986	FALSE	-0.301112	1.66247	1.14336	-0.908241	-0.324309	-0.413626	-0.858541
Zm00001eb217830	87.9944	-1.17894	0.532696	-2.21316	0.0268867	0.0775059	FALSE	-0.359076	0.773734	1.86725	-0.886486	-0.787014	-0.61682	0.008414
Zm00001eb013740	150.32	-1.17858	0.601665	-1.95886	0.0501296	0.124879	FALSE	2.22748	-0.51044	-0.005662	-0.426088	-0.526379	-0.254628	-0.504281
Zm00001eb365590	3750.86	-1.17781	0.487417	-2.41643	0.0156735	0.0505086	FALSE	2.22038	-0.309696	-0.115929	-0.429889	-0.613835	-0.617305	-0.133728
Zm00001eb406130	3135.65	-1.17533	0.506931	-2.31853	0.0204204	0.062324	FALSE	-0.630794	0.848824	1.40557	-1.07947	-0.531395	0.847522	-0.860255
Zm00001eb380060	373.439	-1.17375	0.555061	-2.11463	0.0344617	0.0941062	FALSE	1.92451	-0.487813	-0.632123	-0.76416	-0.749415	-0.007315	0.716319
Zm00001eb126270	110.47	-1.17314	0.632722	-1.85411	0.0637236	0.149067	FALSE	0.745381	-0.665024	-0.654247	-0.729865	-0.877864	1.75828	0.423339
Zm00001eb390750	175.499	-1.1718	0.467416	-2.50697	0.0121771	0.0414066	FALSE	0.318364	1.43831	1.14359	-0.832642	-0.578199	-0.305779	-1.18364
Zm00001eb293670	131.757	-1.17114	0.598317	-1.95739	0.0503012	0.125172	FALSE	-0.655918	2.11275	0.337843	-0.65967	-0.497513	-0.088517	-0.548981
Zm00001eb429830	103.593	-1.16957	0.527518	-2.21711	0.0266155	0.0769144	FALSE	-0.353173	0.364726	2.10463	-0.707199	-0.78004	-0.257898	-0.371045
Zm00001eb221390	168.829	-1.16652	0.713711	-1.63445	0.102165	0.212452	FALSE	-0.303422	1.31421	1.15562	-0.432895	-1.49853	0.321117	-0.556101
Zm00001eb157210	57.5966	-1.16528	0.69208	-1.68374	0.0922321	0.196777	FALSE	-0.836039	1.8034	1.00001	-0.33858	-0.715112	-0.405256	-0.508427
Zm00001eb154040	286.455	-1.16482	0.601532	-1.93643	0.0528153	0.129784	FALSE	1.96608	-0.213999	-0.212054	-0.604935	-0.659753	-0.91376	0.63842
Zm00001eb059880	25.5558	-1.16389	0.641977	-1.81298	0.069835	0.159717	FALSE	2.22073	0.070517	-0.484149	-0.484149	-0.484149	-0.484149	-0.354653
Zm00001eb363840	151.664	-1.16209	0.461615	-2.51744	0.0118211	0.0404542	FALSE	-0.230994	1.03992	1.78398	-0.672743	-0.640677	-0.617232	-0.662258
Zm00001eb344550	402.708	-1.16109	0.582132	-1.99454	0.0460929	0.117314	FALSE	2.04087	-0.071076	0.19958	0.076257	-0.486264	-0.876661	-0.882706
Zm00001eb233010	125.028	-1.16038	0.720991	-1.60943	0.107523	0.220718	FALSE	0.960283	0.294868	1.50649	0.077819	-1.04912	-0.817699	-0.972645
Zm00001eb206420	209.185	-1.15828	0.497203	-2.32959	0.0198281	0.0610152	FALSE	0.487114	-0.740967	-0.323211	-1.08708	-0.82136	0.956408	1.5291
Zm00001eb142430	154.311	-1.15821	0.4812	-2.40693	0.0160873	0.0515363	FALSE	-0.140805	1.37052	1.45912	-0.511845	-0.699515	-0.483712	-0.993757
Zm00001eb279720	347.969	-1.15735	0.466072	-2.48319	0.0130212	0.0436326	FALSE	-0.778657	1.08058	1.41819	-0.973705	-0.913655	0.540759	-0.373504
Zm00001eb048500	26.0353	-1.15435	0.718436	-1.60676	0.108108	0.22155	FALSE	0.31259	0.932506	1.62566	-0.290677	-0.98011	-0.98011	-0.619859
Zm00001eb164070	66.9712	-1.15309	0.532791	-2.16424	0.0304457	0.0854412	FALSE	0.488266	0.829238	1.63377	-0.626991	-0.697299	-0.495793	-1.13119
Zm00001eb318780	126.294	-1.15121	0.552652	-2.08306	0.0372462	0.0998389	FALSE	0.885135	0.667978	1.4372	-0.369595	-0.692892	-0.624893	-1.30293
Zm00001eb046950	37.3802	-1.14943	0.725491	-1.58435	0.113115	0.228943	FALSE	-0.595051	1.15496	1.65157	-0.250594	-1.05346	-0.457565	-0.44986
Zm00001eb037640	4479.42	-1.14903	0.455789	-2.52096	0.0117035	0.0400886	FALSE	0.616459	-0.278188	0.095328	-0.848045	-0.869034	-0.630156	1.91364
Zm00001eb279150	150.734	-1.14783	0.59217	-1.93835	0.0525808	0.129361	FALSE	0.569836	1.80705	-0.850943	-0.847821	-0.652934	0.507167	-0.532357
Zm00001eb080680	60.7237	-1.14783	0.533783	-2.15037	0.0315262	0.087695	FALSE	0.813275	1.14881	1.04238	-0.621261	-0.139054	-1.05552	-1.18863
Zm00001eb157290	35.5704	-1.14757	0.707811	-1.6213	0.104953	0.216727	FALSE	-0.361995	0.878954	1.79533	0.025885	-0.59653	-0.870823	-0.870823
Zm00001eb182880	397.063	-1.14724	0.560938	-2.04521	0.0408339	0.10695	FALSE	-0.361818	1.5599	1.2369	-0.736902	-0.140132	-0.52437	-1.03357
Zm00001eb062770	1047.06	-1.14674	0.474154	-2.4185	0.0155846	0.0503498	FALSE	-0.940838	0.660119	1.05716	-1.06346	-0.854376	-0.153592	1.29499
Zm00001eb208700	74.6199	-1.14672	0.608004	-1.88604	0.0592896	0.141191	FALSE	-0.386122	0.92571	1.82172	-0.15878	-0.818813	-0.586232	-0.797482
Zm00001eb002330	46.849	-1.14617	0.586579	-1.95398	0.0507032	0.125921	FALSE	1.02895	0.57749	1.28552	-0.155118	-0.374145	-1.18135	-1.18135
Zm00001eb188580	141.533	-1.14597	0.521305	-2.19827	0.0279297	0.0797974	FALSE	2.13853	0.142251	-0.010507	-0.47156	-0.342279	-0.672325	-0.784105
Zm00001eb338180	394.647	-1.14463	0.702898	-1.62844	0.103432	0.214394	FALSE	1.80783	0.291897	-0.763721	-0.770596	-0.736892	0.760933	-0.589447
Zm00001eb331550	1561.28	-1.14384	0.454886	-2.51456	0.0119182	0.0406901	FALSE	1.87229	-0.59378	-0.179484	-0.839708	-0.866972	0.787755	-0.1801
Zm00001eb421690	141.532	-1.14372	0.56471	-2.02532	0.0428341	0.110712	FALSE	0.019109	0.625081	1.91726	-0.480406	-0.376061	-0.620825	-1.08416
Zm00001eb265220	101.59	-1.14295	0.48747	-2.34466	0.0190444	0.0590812	FALSE	-0.363194	1.09313	1.25461	-1.35785	-0.940527	-0.244036	0.557864
Zm00001eb261260	127.773	-1.14211	0.581486	-1.96413	0.0495155	0.123746	FALSE	-0.452111	1.11626	1.67377	-0.421431	-0.737875	-0.182246	-0.996373
Zm00001eb236330	25.0725	-1.14059	0.66964	-1.70329	0.0885144	0.19092	FALSE	1.22619	0.669342	0.786296	-0.531518	-1.59415	0.197152	-0.753311
Zm00001eb013280	108.918	-1.13891	0.600125	-1.89779	0.0577233	0.138433	FALSE	-0.780717	1.1076	1.73145	-0.771824	-0.438519	-0.519488	-0.3285
Zm00001eb043360	152.302	-1.13694	0.461225	-2.46504	0.0136998	0.0453845	FALSE	-0.233075	1.29028	1.56901	-0.89778	-0.520431	-0.52474	-0.683265
Zm00001eb229340	268.855	-1.13533	0.445766	-2.54691	0.0108682	0.0376771	FALSE	-0.295258	1.07182	0.178008	-0.964366	-1.1533	1.52914	-0.366039
Zm00001eb415300	50.2989	-1.13495	0.727019	-1.5611	0.1185	0.237038	FALSE	1.72763	0.419537	0.532695	0.08507	-0.921644	-0.921644	-0.921644
Zm00001eb146900	44.3174	-1.13327	0.600532	-1.88711	0.059146	0.140939	FALSE	2.00077	0.26511	0.270489	-0.368163	-0.413876	-0.814768	-0.939563
Zm00001eb112330	91.4962	-1.13264	0.724212	-1.56396	NA	NA	FALSE	1.64587	-0.623454	-0.583325	-0.584494	-0.585452	-0.531983	1.26284
Zm00001eb163200	169.047	-1.13194	0.48306	-2.34328	0.0191153	0.0592421	FALSE	1.01264	-0.398925	1.70596	-0.777564	-0.836718	-0.771996	0.066603
Zm00001eb395600	144.747	-1.13122	0.46323	-2.44202	0.0146054	0.047908	FALSE	0.612116	0.637722	0.002338	-1.01074	-1.29731	-0.461147	1.51702
Zm00001eb073110	174.376	-1.13044	0.501959	-2.25206	0.0243188	0.0717106	FALSE	1.86668	-0.44899	0.776109	-0.59115	-0.922806	-0.713709	0.033861
Zm00001eb336580	192.72	-1.13041	0.569723	-1.98415	0.0472395	0.119418	FALSE	-0.237192	1.31	1.43731	-0.113525	-0.931423	-0.410078	-1.05508
Zm00001eb105190	168.644	-1.12771	0.58424	-1.93022	0.0535798	0.131022	FALSE	0.323835	0.493427	1.83271	-0.667568	-0.448676	-0.282234	-1.25149
Zm00001eb261460	25.08	-1.12732	0.664723	-1.69592	0.0899004	0.193216	FALSE	1.74972	-0.005174	0.924693	-0.227627	-0.667589	-0.808563	-0.965463
Zm00001eb368680	272.497	-1.12728	0.605578	-1.86149	0.0626748	0.14713	FALSE	-0.60906	0.215904	-0.626944	-0.639125	-0.728568	2.03035	0.357444
Zm00001eb429820	293.508	-1.12702	0.657393	-1.71437	0.0864604	0.187552	FALSE	0.289516	0.851904	1.749	-0.782332	-0.543422	-0.782332	-0.782332
Zm00001eb149650	192.049	-1.12589	0.52006	-2.16493	0.0303933	0.0853969	FALSE	-0.454606	1.2241	1.6395	-0.605965	-0.4719	-0.409507	-0.921619
Zm00001eb123280	79.4626	-1.12453	0.525792	-2.13874	0.032457	0.0896557	FALSE	0.022102	1.83327	0.781945	-0.796621	-0.68525	-0.220298	-0.935146
Zm00001eb105530	164.941	-1.12434	0.658751	-1.70677	0.0878654	0.189937	FALSE	-0.267288	1.3881	1.49897	-0.711943	-0.483958	-0.711943	-0.711943
Zm00001eb350750	97.415	-1.1239	0.491808	-2.28523	0.0222991	0.0668005	FALSE	1.63452	0.208344	1.01257	-0.459185	-0.595236	-1.0911	-0.70991
Zm00001eb400350	1322.33	-1.12177	0.461826	-2.42899	0.0151409	0.0492334	FALSE	-0.837447	1.40133	1.46635	-0.721362	-0.684477	-0.290185	-0.334208
Zm00001eb296560	12943.5	-1.12097	0.481998	-2.32567	0.0200361	0.0614929	FALSE	-0.880266	0.846031	1.74354	-0.764732	-0.684714	-0.566979	0.307123
Zm00001eb216540	100.642	-1.11819	0.600867	-1.86096	0.0627497	0.147258	FALSE	-0.483472	1.747	0.781082	-0.66046	-0.747556	0.354936	-0.99153
Zm00001eb069160	507.212	-1.11508	0.563816	-1.97774	0.0479577	0.120726	FALSE	-0.735784	1.1304	1.72382	-0.36807	-0.40789	-0.727185	-0.615298
Zm00001eb033870	360.649	-1.11487	0.611752	-1.82242	0.0683913	0.157031	FALSE	-0.860971	1.29375	0.428728	-0.763844	-0.692686	1.33695	-0.741919
Zm00001eb183030	127.456	-1.1136	0.51813	-2.14926	0.0316136	0.0878463	FALSE	1.70741	0.06559	0.804803	-0.286881	-0.130644	-1.08014	-1.08014
Zm00001eb147290	447.495	-1.11277	0.626083	-1.77734	0.0755116	0.169275	FALSE	2.25804	-0.310889	-0.455802	-0.2984	-0.33979	-0.307384	-0.545774
Zm00001eb167580	137.36	-1.11229	0.492366	-2.25908	0.0238787	0.0706475	FALSE	-0.272279	0.920064	1.72322	-0.656838	-1.00605	-0.809886	0.101769
Zm00001eb068460	29.4634	-1.11069	0.703218	-1.57944	0.114236	0.230611	FALSE	-0.336406	1.65609	1.1688	-0.462831	-0.360049	-0.679303	-0.986304
Zm00001eb002510	120.046	-1.10857	0.475318	-2.33227	0.0196867	0.0606703	FALSE	1.20372	0.58009	1.23991	-0.841666	-0.354776	-0.619143	-1.20813
Zm00001eb075580	56.6902	-1.10852	0.577111	-1.92081	0.0547554	0.1332	FALSE	-0.327452	0.486179	1.25656	-0.822574	-1.4549	1.10653	-0.244338
Zm00001eb050850	446.447	-1.1083	0.431634	-2.56768	0.0102383	0.0359815	FALSE	-0.529691	0.558571	1.98133	-0.731182	-0.902913	-0.362941	-0.013169
Zm00001eb341780	56.1566	-1.10749	0.727006	-1.52336	0.127669	0.251047	FALSE	1.78659	0.817398	-0.190176	-0.835684	0.093242	-0.835684	-0.835684
Zm00001eb357920	398.622	-1.10683	0.449705	-2.46123	0.0138463	0.0457966	FALSE	1.58305	-0.163563	-0.211361	-0.902868	-1.01609	1.16852	-0.457694
Zm00001eb383720	1020.73	-1.10592	0.557797	-1.98266	0.0474058	0.119741	FALSE	-0.812468	1.58249	1.04231	-1.02964	-0.274983	0.238365	-0.746071
Zm00001eb368480	3608.36	-1.10508	0.480756	-2.29863	0.021526	0.0649856	FALSE	-0.76953	1.13215	1.68991	-0.636492	-0.560864	-0.731651	-0.123523
Zm00001eb269010	313.635	-1.10436	0.504903	-2.18727	0.0287229	0.0815762	FALSE	-0.474847	0.770493	1.95067	-0.291022	-0.566585	-0.640594	-0.748114
Zm00001eb142340	131.831	-1.10124	0.659086	-1.67085	0.0947504	0.200794	FALSE	-0.85872	0.379639	2.04711	-0.80858	-0.317619	-0.026554	-0.41527
Zm00001eb099170	79.026	-1.10109	0.474627	-2.3199	0.0203462	0.0621687	FALSE	1.00964	0.427216	1.47765	-1.29612	-0.703293	-0.560998	-0.3541
Zm00001eb350330	1561.04	-1.09999	0.434209	-2.53331	0.0112991	0.0389323	FALSE	-0.555531	0.934007	1.87748	-0.578768	-0.535041	-0.672595	-0.469549
Zm00001eb256510	329.528	-1.09924	0.549728	-1.9996	0.045543	0.116244	FALSE	-0.468122	0.730982	1.93622	-0.121757	-0.649479	-0.569714	-0.858125
Zm00001eb393670	168.231	-1.09772	0.491686	-2.23257	0.0255771	0.0745722	FALSE	2.00406	0.555671	-0.360232	-0.717382	-0.722337	-0.04809	-0.711687
Zm00001eb036010	36.7136	-1.0969	0.715279	-1.53353	0.125145	0.247379	FALSE	0.691851	-1.06584	0.836493	-1.06584	-1.06584	0.935824	0.733355
Zm00001eb002280	43.5228	-1.09671	0.636908	-1.72193	0.0850816	0.185554	FALSE	0.506895	-0.06884	-0.701158	-1.11274	-0.815025	1.78256	0.408303
Zm00001eb108640	150.808	-1.09568	0.446931	-2.45157	0.0142234	0.0468113	FALSE	0.813537	0.086915	1.82319	-0.349933	-0.805449	-0.837383	-0.730875
Zm00001eb131630	57.9687	-1.09549	0.624713	-1.7536	0.0794996	0.176051	FALSE	-0.335354	1.73192	-0.721602	-0.986703	-0.848732	0.577328	0.583146
Zm00001eb099970	764.676	-1.09514	0.497964	-2.19923	0.0278617	0.0796763	FALSE	2.2292	-0.139436	-0.171125	-0.34621	-0.36545	-0.612124	-0.594851
Zm00001eb210030	302.845	-1.09275	0.533883	-2.04679	0.040679	0.106574	FALSE	-0.570122	1.14015	1.60599	-0.912691	-0.348999	0.002732	-0.917062
Zm00001eb233230	450.576	-1.09214	0.468254	-2.33238	0.019681	0.0606626	FALSE	2.12406	-0.119757	-0.007413	-0.728324	-0.590818	-0.765955	0.088211
Zm00001eb213420	102.434	-1.09117	0.581454	-1.87662	0.0605702	0.143362	FALSE	0.451833	1.47124	0.1907	-0.394796	-1.4116	0.682741	-0.990114
Zm00001eb368250	29.3094	-1.09097	0.716764	-1.52208	0.127989	0.251514	FALSE	0.478612	1.06348	1.41764	-0.325832	-1.06576	-1.06576	-0.502376
Zm00001eb414870	55.5398	-1.09093	0.569001	-1.91728	0.0552028	0.133951	FALSE	1.64685	0.112829	0.962988	-0.111147	-0.674558	-1.01599	-0.920976
Zm00001eb127940	671.161	-1.0901	0.581701	-1.87399	0.0609324	0.144	FALSE	-0.668007	1.47564	1.3596	-0.442163	-0.10057	-0.776042	-0.848457
Zm00001eb210420	266.367	-1.0892	0.506729	-2.14948	0.0315965	0.0878225	FALSE	1.96927	-0.661408	-0.161342	-0.810299	-0.865535	0.501993	0.02732
Zm00001eb151340	261.132	-1.08742	0.503831	-2.1583	0.0309042	0.0863642	FALSE	2.08471	-0.348909	-0.03688	-0.428734	-1.1534	0.012054	-0.128844
Zm00001eb427060	528.513	-1.08732	0.444334	-2.44707	0.0144021	0.047358	FALSE	0.013587	0.281638	0.934729	-0.611686	-1.93445	0.837491	0.478687
Zm00001eb379280	192.085	-1.0839	0.479236	-2.26172	0.023715	0.0702523	FALSE	-0.147802	1.86402	0.816839	-0.312947	-0.789585	-0.929488	-0.501035
Zm00001eb038190	173.434	-1.0836	0.498604	-2.17327	0.0297598	0.0839206	FALSE	1.73029	-0.491737	-0.423548	-0.940623	-1.01586	0.661984	0.479494
Zm00001eb430980	32.3809	-1.08344	0.722289	-1.50001	0.133611	0.259681	FALSE	-0.36751	0.690817	1.82894	-0.329315	-1.33924	-0.350669	-0.133028
Zm00001eb041780	12656	-1.08201	0.443989	-2.43701	0.0148092	0.0483555	FALSE	-1.12037	0.777447	1.2782	-1.03577	-0.936651	0.614915	0.422229
Zm00001eb038930	299.894	-1.08171	0.438918	-2.46449	0.0137208	0.04543	FALSE	-0.508475	1.35258	1.41316	-1.03893	-0.672299	-0.615454	0.06943
Zm00001eb162720	287.972	-1.0801	0.470774	-2.29431	0.0217726	0.065592	FALSE	1.12801	-0.452961	-0.132406	-0.868798	-1.05638	-0.22482	1.60736
Zm00001eb009360	170.377	-1.07994	0.528184	-2.04463	0.0408917	0.107027	FALSE	-0.26147	1.81458	0.808066	-0.552639	-0.743819	-0.002973	-1.06174
Zm00001eb065470	431.87	-1.07956	0.429691	-2.51241	0.0119911	0.0408764	FALSE	-0.212538	0.740658	1.90635	-0.661077	-0.665326	-0.180871	-0.927195
Zm00001eb163050	512.154	-1.07945	0.51361	-2.10169	0.0355802	0.0963933	FALSE	-0.956157	1.05547	1.55344	-0.801696	-0.733096	0.37198	-0.489943
Zm00001eb303190	789.503	-1.07411	0.640268	-1.6776	0.0934256	0.198647	FALSE	-0.521333	-0.281072	0.134853	-0.49026	-0.602145	2.19895	-0.438992
Zm00001eb318280	48.5414	-1.06914	0.613135	-1.74372	0.0812076	0.179108	FALSE	-0.410031	1.55563	1.19881	-0.425091	-1.10379	-0.059101	-0.756427
Zm00001eb163970	157.402	-1.06738	0.454249	-2.34977	0.0187849	0.0584319	FALSE	0.340137	1.41827	0.779652	-1.52282	-0.565128	0.287441	-0.737549
Zm00001eb138650	251.685	-1.06699	0.477221	-2.23585	0.0253618	0.0741104	FALSE	-0.388382	1.61378	0.918869	-0.797035	-0.848506	0.429222	-0.927949
Zm00001eb299330	203.834	-1.06531	0.46645	-2.28387	0.022379	0.0669629	FALSE	1.81298	-0.13002	0.42769	-1.00626	-0.761592	-0.827891	0.485094
Zm00001eb330320	155.396	-1.06459	0.55754	-1.90944	0.0562053	0.135806	FALSE	1.03449	0.229011	1.35694	-0.608955	-0.832498	-1.38862	0.209622
Zm00001eb070940	834.178	-1.06329	0.503944	-2.10994	0.0348637	0.0949536	FALSE	-0.735388	1.29188	1.57934	-0.443876	-0.609676	-0.275089	-0.807185
Zm00001eb271680	729.775	-1.0618	0.426494	-2.48959	0.0127889	0.0430164	FALSE	-0.493037	1.1685	1.69182	-0.845892	-0.400622	-0.672572	-0.448199
Zm00001eb133070	343.379	-1.06071	0.506258	-2.09519	0.0361539	0.09757	FALSE	2.1309	-0.338787	-0.393651	-0.689733	-0.715181	-0.314815	0.321269
Zm00001eb084550	458.158	-1.06054	0.537154	-1.97437	0.0483397	0.121483	FALSE	-0.76562	0.53682	0.789981	-0.614799	-1.07533	1.64383	-0.514881
Zm00001eb395570	24.8102	-1.0605	0.637576	-1.66332	0.0962476	0.203205	FALSE	0.918027	0.913544	1.29686	-0.595886	-0.726769	-1.15503	-0.650743
Zm00001eb398820	420.691	-1.06033	0.441961	-2.39915	0.0164331	0.0524459	FALSE	-0.132462	1.22516	1.51713	-0.399894	-0.236067	-0.8974	-1.07647
Zm00001eb162140	619.796	-1.05921	0.442482	-2.39379	0.0166753	0.0530556	FALSE	2.04282	0.329533	-0.019921	-0.563871	-0.128338	-0.881538	-0.778688
Zm00001eb289570	317.729	-1.05908	0.511432	-2.0708	0.0383771	0.102093	FALSE	-0.546747	1.20906	1.45885	-1.03322	-0.405801	0.227319	-0.909463
Zm00001eb406520	681.604	-1.0587	0.447757	-2.36446	0.0180566	0.0565341	FALSE	-0.472722	1.05581	1.77592	-0.308082	-0.653073	-0.767819	-0.630035
Zm00001eb343630	115.342	-1.05862	0.637087	-1.66166	0.0965802	0.2037	FALSE	2.1175	-0.659671	-0.174358	-0.520313	-0.622484	-0.50766	0.366982
Zm00001eb130890	96.746	-1.0586	0.57407	-1.84403	0.0651784	0.151709	FALSE	-1.0689	0.549698	0.729987	-1.14933	-0.929839	0.720377	1.148
Zm00001eb397300	288.842	-1.05775	0.459915	-2.29987	0.0214555	0.0648252	FALSE	2.00369	-0.511912	0.050995	-0.699075	-1.09501	0.15054	0.100769
Zm00001eb049740	222.976	-1.05689	0.626952	-1.68575	0.0918434	0.196394	FALSE	2.11474	0.176433	0.119835	-0.652057	-0.652057	-0.652057	-0.454831
Zm00001eb413150	750.226	-1.05678	0.532524	-1.98447	0.0472029	0.119385	FALSE	-0.783039	1.74886	1.1023	-0.388257	-0.499643	-0.499549	-0.680679
Zm00001eb285330	241.71	-1.05533	0.440651	-2.39494	0.0166229	0.0529102	FALSE	-0.112303	0.866214	1.80851	-0.372179	-1.01524	-0.818611	-0.356383
Zm00001eb258290	560.026	-1.05531	0.473843	-2.22713	0.0259383	0.0754015	FALSE	-0.474565	0.66242	1.06562	-0.871666	-0.928324	1.37542	-0.828903
Zm00001eb275630	240.058	-1.05525	0.502765	-2.09889	0.0358266	0.0968971	FALSE	-0.850099	1.56808	1.25682	-0.77654	-0.71878	-0.193591	-0.285886
Zm00001eb111200	207.866	-1.05331	0.45863	-2.29665	0.0216386	0.0652518	FALSE	-0.00018	0.374751	2.05857	-0.5915	-0.315091	-0.702033	-0.824519
Zm00001eb342330	1250.43	-1.05314	0.423027	-2.48953	0.0127913	0.0430167	FALSE	1.91348	-0.4778	-0.11927	-0.860676	-0.888436	0.702338	-0.269638
Zm00001eb418820	57.691	-1.05309	0.557093	-1.89033	0.0587138	0.140124	FALSE	0.591676	0.403809	1.71357	-0.466015	-1.21455	-0.92004	-0.108453
Zm00001eb315240	139.233	-1.05134	0.551676	-1.90572	0.0566867	0.13665	FALSE	2.00342	-0.468511	0.659475	-0.584955	-0.375136	-0.408244	-0.826046
Zm00001eb378120	163.326	-1.05128	0.579613	-1.81376	0.0697147	0.159461	FALSE	0.194259	-0.486506	-0.269904	-0.611169	-0.771318	2.15415	-0.209514
Zm00001eb151350	71.645	-1.05076	0.684636	-1.53477	0.124841	0.246968	FALSE	-0.350957	-0.376276	-0.399578	-0.474725	-0.492071	2.25438	-0.160775
Zm00001eb041690	21.5476	-1.05003	0.718775	-1.46086	0.144053	0.274181	FALSE	0.508314	0.863887	0.645473	-0.66747	-1.96925	0.131168	0.487875
Zm00001eb172360	68.0076	-1.04939	0.58339	-1.79877	0.0720544	0.163629	FALSE	-0.061512	-0.845058	0.353066	-1.03813	-0.885725	1.57526	0.902093
Zm00001eb398410	364.57	-1.0493	0.547108	-1.91789	0.0551243	0.133818	FALSE	-0.77553	1.9001	0.495834	-0.923929	-0.421785	0.348995	-0.623684
Zm00001eb285640	538.694	-1.04843	0.53665	-1.95366	0.0507413	0.125981	FALSE	-0.777801	1.50147	1.32088	-0.821428	-0.289162	-0.149643	-0.784312
Zm00001eb202390	2257.3	-1.04377	0.432982	-2.41065	0.0159241	0.0511099	FALSE	-0.459726	1.11738	1.71596	-0.622168	-0.396284	-0.935694	-0.419464
Zm00001eb121680	62.2939	-1.04303	0.724776	-1.4391	0.150122	0.28208	FALSE	-0.4882	0.630822	1.94539	-0.087223	-1.02182	-0.644829	-0.334135
Zm00001eb170720	222.054	-1.0425	0.549418	-1.89746	0.057767	0.13847	FALSE	-0.737905	1.16566	1.65049	-0.497189	-0.657497	-0.096644	-0.826913
Zm00001eb411300	2800.13	-1.04136	0.405921	-2.56543	0.0103048	0.036188	FALSE	-0.4961	0.312419	0.199427	-0.94903	-0.833994	1.99239	-0.225114
Zm00001eb054890	190.997	-1.04134	0.439314	-2.37039	0.0177694	0.0558224	FALSE	0.276443	0.559415	1.66077	-0.496702	-1.47749	-0.639587	0.117153
Zm00001eb165880	1451.69	-1.04082	0.477524	-2.17963	0.0292849	0.0827814	FALSE	-0.72289	1.4803	1.42422	-0.58998	-0.406463	-0.447433	-0.737749
Zm00001eb242690	1887.93	-1.04039	0.58686	-1.77281	0.0762603	0.170687	FALSE	1.7723	-0.620224	-0.719022	-0.806613	-0.516267	-0.122639	1.01246
Zm00001eb283760	229.623	-1.04034	0.489522	-2.12522	0.0335682	0.0920256	FALSE	-0.592	1.44649	1.43823	-0.671	-0.595432	-0.793584	-0.232701
Zm00001eb352880	75.4578	-1.03999	0.571865	-1.81859	0.0689744	0.158137	FALSE	-0.477982	1.38563	0.720002	-1.05425	-0.831798	0.994195	-0.735802
Zm00001eb379180	21.6781	-1.03724	0.724917	-1.43085	0.152474	0.285235	FALSE	-0.530307	0.547651	0.786782	-0.675811	-1.27353	1.58885	-0.443634
Zm00001eb396690	385.721	-1.0368	0.461803	-2.2451	0.0247615	0.07274	FALSE	-0.690285	1.11962	1.69832	-0.725004	-0.688321	-0.61319	-0.101146
Zm00001eb189950	1427.84	-1.03564	0.419544	-2.46848	0.0135687	0.0450382	FALSE	2.16211	-0.205884	0.222339	-0.404565	-0.513376	-0.554052	-0.706574
Zm00001eb181500	81.1905	-1.03472	0.614519	-1.68379	0.0922217	0.196777	FALSE	-0.702973	0.558367	2.05815	-0.418033	-0.630271	-0.35601	-0.509234
Zm00001eb300270	116.546	-1.03454	0.54777	-1.88864	0.0589401	0.140521	FALSE	-0.270984	0.739575	1.90169	-0.897904	-0.096413	-0.710412	-0.665553
Zm00001eb385720	172.766	-1.03301	0.461063	-2.2405	0.0250583	0.0733694	FALSE	0.488014	1.29291	1.16195	-0.717276	-0.640367	-1.32133	-0.2639
Zm00001eb385850	85.5409	-1.03294	0.500897	-2.06218	0.0391907	0.10368	FALSE	1.55102	-0.211211	0.497298	-0.840389	-1.4807	-0.136547	0.620534
Zm00001eb176930	3670.19	-1.03278	0.429251	-2.40601	0.0161279	0.0516307	FALSE	-0.870359	0.893103	1.58883	-0.765773	-0.94993	-0.409595	0.513722
Zm00001eb055280	1188.55	-1.03021	0.406503	-2.53433	0.0112662	0.038833	FALSE	-0.713081	1.20494	1.58933	-0.864701	-0.74281	-0.010992	-0.462684
Zm00001eb027780	84.2478	-1.03012	0.673399	-1.52973	0.126084	0.248715	FALSE	-0.900739	1.1217	0.48155	-0.636226	-0.856651	1.45528	-0.66491
Zm00001eb066480	90.3502	-1.02956	0.501958	-2.05108	0.0402593	0.105727	FALSE	-0.145087	1.31893	0.522647	-0.950164	-1.30778	1.05387	-0.492422
Zm00001eb279890	261.184	-1.02946	0.411547	-2.50143	0.0123692	0.0419394	FALSE	2.03534	-0.02695	0.496274	-0.581889	-0.699929	-0.742202	-0.480644
Zm00001eb057360	545.816	-1.02908	0.459077	-2.24163	0.0249852	0.0732587	FALSE	1.83742	-0.392203	-0.33169	-0.93633	-0.783967	-0.281698	0.888468
Zm00001eb105170	135.985	-1.02854	0.628783	-1.63577	0.101888	0.212112	FALSE	2.22783	-0.487715	-0.101627	-0.143519	-0.596871	-0.5141	-0.383994
Zm00001eb107690	326.401	-1.02705	0.472369	-2.17425	0.0296866	0.0837646	FALSE	2.16501	-0.232158	0.19007	-0.41024	-0.623959	-0.734667	-0.354055
Zm00001eb245960	479.965	-1.02505	0.559328	-1.83265	0.0668551	0.154436	FALSE	-0.616536	-0.351895	0.391128	-0.932327	-0.552656	2.04156	0.020724
Zm00001eb223190	187.293	-1.02434	0.445041	-2.30167	0.0213538	0.0645703	FALSE	-0.336743	1.4037	1.43788	-0.890045	-0.645835	-0.192921	-0.776035
Zm00001eb103860	43.3246	-1.02381	0.645264	-1.58666	0.112591	0.228192	FALSE	-0.8087	0.824527	1.82305	-0.678304	-0.807859	-0.465949	0.113239
Zm00001eb193690	144.879	-1.0227	0.630808	-1.62125	0.104965	0.216727	FALSE	-0.655738	0.513765	1.71118	-0.661599	-0.631768	0.728973	-1.00482
Zm00001eb193290	89.5161	-1.01896	0.550281	-1.85171	0.0640678	0.149684	FALSE	1.22323	0.805676	0.754832	-1.42579	-0.18426	-0.072437	-1.10125
Zm00001eb176610	64.5623	-1.01876	0.696763	-1.46212	0.143707	0.273749	FALSE	1.75296	0.373141	0.633296	-0.283624	-0.44275	-1.16445	-0.86857
Zm00001eb243560	114.244	-1.01851	0.537299	-1.89561	0.058011	0.138838	FALSE	-0.270772	1.39108	1.32405	-0.633509	-0.764691	0.070705	-1.11686
Zm00001eb211170	421.266	-1.01755	0.442709	-2.29846	0.0215356	0.0650042	FALSE	-0.636505	-0.046535	0.528498	-0.890279	-0.926584	0.058608	1.9128
Zm00001eb026910	454.445	-1.01729	0.686748	-1.48132	0.138521	0.266552	FALSE	-0.626416	0.71829	1.98469	-0.47813	-0.750238	-0.396617	-0.451574
Zm00001eb020010	195.904	-1.01711	0.645533	-1.57561	0.115115	0.231884	FALSE	-0.487192	-0.414542	-0.582865	-0.739674	-0.600679	0.992382	1.83257
Zm00001eb425270	1365.5	-1.01634	0.444785	-2.28501	0.0223124	0.0668082	FALSE	-1.07516	0.730427	1.31122	-1.12169	-0.843921	0.252864	0.746253
Zm00001eb085340	2088.27	-1.01539	0.406868	-2.49563	0.0125734	0.0424755	FALSE	2.21111	-0.164714	0.00963	-0.488388	-0.625578	-0.542207	-0.399858
Zm00001eb204260	1578.68	-1.01489	0.466545	-2.17534	0.0296049	0.0835594	FALSE	2.21512	-0.304074	-0.172758	-0.548592	-0.541335	-0.612918	-0.035446
Zm00001eb110280	3012.2	-1.01454	0.461502	-2.19835	0.027924	0.0797932	FALSE	-0.781519	1.1032	1.64926	-0.70364	-0.59833	-0.76764	0.098667
Zm00001eb163500	145.585	-1.01429	0.47827	-2.12075	0.0339431	0.0929212	FALSE	-0.330984	0.606125	2.03538	-0.65411	-0.663812	-0.594181	-0.398416
Zm00001eb169270	23.7521	-1.01059	0.714166	-1.41507	0.157049	0.29131	FALSE	0.647037	0.761815	1.52489	-0.247773	-1.08218	-1.08218	-0.521604
Zm00001eb339840	160.761	-1.01012	0.588777	-1.71563	0.0862305	0.187249	FALSE	-0.449951	1.21534	1.52126	-0.175373	-0.132394	-0.98944	-0.98944
Zm00001eb369480	275.462	-1.00911	0.533736	-1.89065	0.0586708	0.140093	FALSE	2.24078	-0.419654	-0.234095	-0.41487	-0.655498	-0.338151	-0.17851
Zm00001eb151820	103.148	-1.00905	0.621824	-1.62273	0.104648	0.216384	FALSE	-0.816944	0.862095	1.90127	-0.359628	-0.586235	-0.477801	-0.522756
Zm00001eb373120	481.277	-1.00858	0.425806	-2.36865	0.0178533	0.0560199	FALSE	0.266748	0.769639	1.63891	-0.824361	-0.607599	0.022074	-1.26541
Zm00001eb368220	139.846	-1.00824	0.499787	-2.01734	0.0436603	0.112365	FALSE	1.10517	0.201661	0.332703	-1.19873	-0.831151	1.29592	-0.905571
Zm00001eb234970	811.243	-1.00668	0.436289	-2.30737	0.0210342	0.0638108	FALSE	2.12338	-0.173286	0.215869	-0.700025	-0.419838	-0.84019	-0.205912
Zm00001eb090440	593.931	-1.00634	0.404204	-2.48969	0.0127853	0.0430121	FALSE	1.86184	0.252667	0.358031	-0.741012	-0.768898	-1.08872	0.126084
Zm00001eb000320	1337.8	-1.00627	0.39968	-2.51768	0.0118131	0.0404415	FALSE	2.19164	0.127184	-0.269721	-0.659732	-0.601097	-0.377692	-0.41058
Zm00001eb252760	137.116	-1.00572	0.415832	-2.41856	0.0155819	0.0503498	FALSE	0.792449	0.38022	1.06013	-0.880905	-1.70396	-0.249474	0.60154
Zm00001eb129430	54.2521	-1.00533	0.554209	-1.81399	0.0696796	0.15942	FALSE	0.774896	0.07781	1.21931	-1.16501	-1.07807	0.913982	-0.742919
Zm00001eb124270	241.582	-1.00515	0.50552	-1.98834	0.0467738	0.11853	FALSE	-0.490071	1.48152	0.929823	-0.527678	-1.09825	0.617873	-0.913218
Zm00001eb345670	276.293	-1.00512	0.398413	-2.52282	0.0116419	0.0399216	FALSE	0.058523	0.882279	1.77069	-0.267172	-0.714238	-0.816401	-0.913676
Zm00001eb246370	44856.8	-1.00494	0.42926	-2.34111	0.0192266	0.0595574	FALSE	1.33845	-0.393404	0.387379	-0.808999	-0.929573	-0.869927	1.27608
Zm00001eb329770	215.118	-1.00315	0.414506	-2.42011	0.0155158	0.0502145	FALSE	1.92626	0.434397	0.050638	-0.584166	-1.22218	-0.502859	-0.102082
Zm00001eb090450	375.913	-1.0023	0.424077	-2.36348	0.018104	0.0566444	FALSE	-0.099843	0.890842	1.52284	-1.02137	-0.735819	-1.03259	0.475947
Zm00001eb077470	134.425	-1.00201	0.65846	-1.52175	0.128071	0.251622	FALSE	-0.966608	0.997791	1.00151	-0.576313	-0.842109	1.18064	-0.794907
Zm00001eb221970	831.556	-1.00182	0.480544	-2.08476	0.0370911	0.0995663	FALSE	-0.614476	0.813784	1.47693	-1.20937	-0.429537	0.733355	-0.770689
Zm00001eb259190	298.047	-1.00064	0.590197	-1.69543	0.0899935	0.193394	FALSE	-0.702204	1.24044	1.18574	-1.06748	-0.277567	0.608624	-0.987555
Zm00001eb091920	163.179	-1.00007	0.604219	-1.65514	0.0978956	0.205822	FALSE	-0.439126	-0.17283	-0.298022	-0.537482	-0.58001	2.24008	-0.212614
Zm00001eb134700	530.203	-1.00004	0.432197	-2.31386	0.0206756	0.0629791	FALSE	0.684301	0.023632	1.86406	-0.676805	-0.180945	-0.637669	-1.07658
Zm00001eb055080	2004.24	-0.999973	0.327197	-3.05618	0.00224179	0.0106613	FALSE	0.154921	1.1077	1.53129	-0.71859	-0.804517	-1.10072	-0.170093
Zm00001eb242100	2784.06	-0.999927	0.314731	-3.17709	0.00148761	0.00765603	FALSE	-0.45426	0.927382	1.27719	-1.06587	-1.23559	-0.218265	0.769408
Zm00001eb358870	525.478	-0.999726	0.34456	-2.90146	0.00371427	0.0161505	FALSE	0.006028	1.51883	1.24474	-0.546249	-1.0008	-0.391658	-0.830881
Zm00001eb141890	3302.13	-0.999362	0.231988	-4.30781	1.64875e-05	0.000166581	FALSE	0.619657	0.390153	1.58356	-1.24828	-1.14272	-0.290445	0.088075
Zm00001eb327930	69.7578	-0.999334	0.604966	-1.65189	0.0985578	0.206835	FALSE	0.662103	0.488809	1.29495	-0.305131	-1.34444	0.446876	-1.24317
Zm00001eb290900	970.886	-0.998597	0.262314	-3.80688	0.000140731	0.00105075	FALSE	0.686916	0.937879	1.46204	-0.769869	-0.772103	-1.02624	-0.518618
Zm00001eb039390	1557.55	-0.998283	0.278952	-3.57869	0.000345325	0.00223401	FALSE	0.651082	0.56093	1.554	-0.228425	-0.188684	-1.16809	-1.18082
Zm00001eb388340	178.518	-0.997877	0.545606	-1.82893	0.0674094	0.155351	FALSE	-0.061708	0.410139	1.65061	-0.969983	-0.559486	0.697775	-1.16734
Zm00001eb330020	5272.45	-0.997501	0.273437	-3.64801	0.000264277	0.00178516	FALSE	1.23689	0.544669	1.21184	-0.912165	-0.790623	-1.10079	-0.189818
Zm00001eb015690	846.013	-0.997273	0.273427	-3.64731	0.000264998	0.00178752	FALSE	0.298316	0.123407	1.46639	-1.24654	-1.3662	0.539163	0.18547
Zm00001eb171030	3673.06	-0.996309	0.216987	-4.59156	4.39953e-06	5.24285e-05	FALSE	0.870409	0.526361	1.09068	-1.44091	-1.19388	-0.289199	0.436528
Zm00001eb255570	440.271	-0.995528	0.343645	-2.89697	0.00376789	0.0163316	FALSE	0.105971	1.11993	1.60512	-0.998619	-0.445371	-0.676109	-0.71092
Zm00001eb370260	1343.71	-0.995051	0.325588	-3.05616	0.0022419	0.0106613	FALSE	5.3e-05	0.323615	1.96382	-1.20334	-0.72063	-0.233105	-0.13041
Zm00001eb243260	262.185	-0.994899	0.555956	-1.78953	0.0735295	0.166076	FALSE	-0.832516	0.204642	0.297904	-0.92515	-0.672527	1.96637	-0.038719
Zm00001eb219220	141.426	-0.994586	0.373628	-2.66197	0.00776859	0.0289723	FALSE	1.27413	0.892581	0.97405	-1.0977	-0.707666	-0.797593	-0.537796
Zm00001eb057180	754.183	-0.994129	0.264331	-3.76093	0.000169284	0.00122045	FALSE	0.947413	0.679144	1.41926	-0.760717	-1.12427	-0.815393	-0.345436
Zm00001eb231330	1574.47	-0.993588	0.316311	-3.14118	0.00168271	0.00844343	FALSE	1.72858	0.089253	0.861854	-0.684009	-1.01081	-0.871033	-0.113839
Zm00001eb304930	1099.67	-0.99354	0.286279	-3.47053	0.000519427	0.0031577	FALSE	-0.131825	0.792799	1.48958	-1.19154	-1.21801	-0.185477	0.44447
Zm00001eb012540	1245.62	-0.993538	0.253564	-3.91829	8.91798e-05	0.000707784	FALSE	1.57083	0.675897	0.671956	-0.90103	-1.12347	-0.172969	-0.721216
Zm00001eb066310	166.698	-0.993358	0.390119	-2.5463	0.0108872	0.0377291	FALSE	1.58135	0.219849	1.05317	-0.662022	-1.14868	-0.66233	-0.381334
Zm00001eb006540	1163.48	-0.992926	0.356404	-2.78596	0.00533694	0.0215173	FALSE	0.172111	0.822676	1.67983	-0.863766	-0.692649	-1.1162	-0.002008
Zm00001eb216070	2938.37	-0.992597	0.456659	-2.17361	0.0297347	0.0838751	FALSE	2.09673	-0.062946	0.205227	-0.538255	-0.268026	-1.00766	-0.425076
Zm00001eb182810	698.068	-0.992559	0.450056	-2.20541	0.0274253	0.0787543	FALSE	-0.58978	1.14696	1.51084	-0.920432	-0.574156	0.310243	-0.88368
Zm00001eb198280	5100.39	-0.99213	0.315807	-3.14157	0.00168042	0.00843649	FALSE	0.278248	0.632683	1.70402	-0.973744	-0.809296	-0.994504	0.162595
Zm00001eb176030	1914.72	-0.992061	0.290636	-3.41341	0.000641546	0.00378414	FALSE	0.528033	0.752025	1.66849	-0.587108	-0.73542	-1.0996	-0.526421
Zm00001eb284570	268.065	-0.991935	0.361924	-2.74073	0.00613037	0.0240154	FALSE	0.289676	1.15467	1.4601	-1.13424	-0.544849	-0.854332	-0.37103
Zm00001eb104950	1493.18	-0.991836	0.281363	-3.52511	0.000423307	0.00266007	FALSE	0.148079	1.38987	1.23433	-0.954456	-0.993544	-0.78958	-0.034701
Zm00001eb354170	6230.91	-0.991732	0.226987	-4.36912	1.2475e-05	0.000129477	FALSE	0.6727	0.872741	1.52938	-0.604049	-0.755149	-0.999196	-0.716429
Zm00001eb154010	1259.91	-0.991419	0.244651	-4.05239	5.06977e-05	0.000433149	FALSE	1.53024	0.319967	0.647911	-1.24622	-1.23652	-0.172097	0.156718
Zm00001eb270800	1451.9	-0.991378	0.269641	-3.67666	0.000236311	0.00162157	FALSE	0.212128	0.097299	0.704749	-1.12451	-1.48667	0.20736	1.38965
Zm00001eb332650	390.539	-0.991374	0.376578	-2.63258	0.00847382	0.0310501	FALSE	0.472701	0.990419	1.46388	-0.933452	-0.159744	-0.72401	-1.10979
Zm00001eb149010	491.835	-0.991182	0.381367	-2.59903	0.00934885	0.0335512	FALSE	-0.304134	0.518357	2.02448	-0.808685	-0.814389	-0.43741	-0.17822
Zm00001eb061480	2987.39	-0.990513	0.309052	-3.20501	0.0013506	0.00707586	FALSE	-0.241726	0.943373	1.45239	-1.25733	-0.929401	-0.482144	0.514839
Zm00001eb241560	741.306	-0.990329	0.259106	-3.8221	0.000132319	0.000998333	FALSE	1.56822	0.512458	0.88368	-1.02123	-0.952588	-0.662989	-0.327554
Zm00001eb177060	1641.96	-0.990248	0.293536	-3.37351	0.000742159	0.00429343	FALSE	0.565495	0.463885	1.79246	-0.656413	-0.953068	-0.307868	-0.904493
Zm00001eb386650	609.436	-0.990022	0.292377	-3.38611	0.000708898	0.00412275	FALSE	1.07022	0.44099	1.09339	-1.06539	-1.30256	-0.6683	0.43164
Zm00001eb202700	653.041	-0.989993	0.398401	-2.48491	0.0129583	0.0434763	FALSE	1.18111	-0.666516	-0.289928	-0.904613	-1.21181	0.961779	0.929976
Zm00001eb310390	361.572	-0.989655	0.451969	-2.18965	0.0285494	0.0811708	FALSE	1.86406	-0.28052	-0.473658	-0.829512	-0.990837	-0.03207	0.74254
Zm00001eb257850	1703.41	-0.989505	0.267988	-3.69235	0.000222192	0.00153656	FALSE	0.026302	0.869377	1.69515	-1.06094	-1.06265	-0.28829	-0.178948
Zm00001eb082830	746.936	-0.98928	0.347919	-2.84342	0.00446326	0.018715	FALSE	-0.166386	0.663341	1.97795	-0.827977	-0.68764	-0.452205	-0.507082
Zm00001eb417150	1201.1	-0.989149	0.482485	-2.05012	0.0403532	0.105899	FALSE	-0.526016	1.85207	0.893391	-0.522725	-0.169129	-0.648995	-0.878602
Zm00001eb413100	252.642	-0.989088	0.371572	-2.6619	0.00777006	0.0289723	FALSE	0.627939	-0.437305	0.157327	-1.08597	-1.28294	0.499443	1.52151
Zm00001eb084590	21446.7	-0.988946	0.227535	-4.34634	1.38428e-05	0.000142327	FALSE	-0.116639	0.237621	1.08401	-1.35069	-1.34512	0.675154	0.815663
Zm00001eb126650	444.592	-0.988648	0.40504	-2.44086	0.0146522	0.0480362	FALSE	-0.535842	0.897662	1.84666	-0.673014	-0.923812	-0.264074	-0.347581
Zm00001eb220880	714.579	-0.98829	0.466812	-2.11711	0.0342507	0.0936261	FALSE	-0.803446	1.21073	1.62322	-0.756447	-0.536307	-0.122102	-0.615647
Zm00001eb056820	2321.27	-0.987891	0.22469	-4.39669	1.09914e-05	0.000116783	FALSE	0.495398	0.916757	1.42658	-1.23463	-1.05162	-0.056955	-0.495532
Zm00001eb081650	9762.65	-0.987734	0.27705	-3.56518	0.000363603	0.00233444	FALSE	0.273817	0.470678	1.42656	-1.27371	-1.07862	-0.567464	0.748744
Zm00001eb148070	377.184	-0.987672	0.360574	-2.73916	0.00615955	0.0241023	FALSE	0.017167	0.006189	1.18852	-1.56593	-0.931221	0.172644	1.11264
Zm00001eb368790	159.854	-0.987333	0.419511	-2.35353	0.018596	0.0579119	FALSE	1.86236	0.260528	-0.079136	-1.02434	-1.13045	0.304655	-0.193618
Zm00001eb293110	1797.66	-0.987331	0.369131	-2.67474	0.00747867	0.0281276	FALSE	1.79722	-0.01997	0.862088	-0.6176	-0.536888	-1.09902	-0.385832
Zm00001eb188720	1006.27	-0.986717	0.353104	-2.79441	0.0051995	0.0210817	FALSE	1.73847	0.120739	0.837961	-0.595268	-0.169245	-0.894313	-1.03835
Zm00001eb319210	88.7552	-0.986418	0.594017	-1.66059	0.0967962	0.20404	FALSE	-0.235518	1.98781	0.047909	-1.03014	-0.365341	0.395258	-0.79998
Zm00001eb063150	147.582	-0.986184	0.434888	-2.26767	0.0233492	0.0693485	FALSE	1.66635	-0.176044	0.266703	-1.37132	-0.925709	-0.074868	0.614892
Zm00001eb050400	95.2633	-0.985726	0.47494	-2.07547	0.0379426	0.10124	FALSE	-0.33865	1.2594	1.12833	-1.12598	-1.14056	0.574429	-0.356954
Zm00001eb151070	760.138	-0.985691	0.26451	-3.72649	0.000194168	0.00137071	FALSE	1.03997	0.842834	1.25008	-0.985695	-0.413604	-0.860886	-0.8727
Zm00001eb182170	29.5351	-0.985354	0.626673	-1.57236	0.115867	0.233047	FALSE	1.37224	0.540385	1.08879	-0.49265	-0.46805	-1.23881	-0.801901
Zm00001eb003580	781.985	-0.985334	0.369848	-2.66416	0.00771813	0.0288162	FALSE	1.39024	0.378884	1.06344	-0.696592	-0.822494	-1.27659	-0.036892
Zm00001eb052690	903.75	-0.98523	0.330652	-2.97965	0.00288574	0.0131369	FALSE	0.62763	0.841464	1.49087	-0.42905	-0.420992	-1.26486	-0.845067
Zm00001eb265250	2112.37	-0.984953	0.361461	-2.72492	0.00643174	0.0249238	FALSE	1.89138	-0.270575	0.003286	-0.994123	-0.923516	-0.335516	0.629063
Zm00001eb305140	102.55	-0.984381	0.686727	-1.43344	0.151732	0.284389	FALSE	1.06876	0.656342	1.24594	-0.264722	-0.442047	-1.28324	-0.981025
Zm00001eb040870	625.302	-0.984219	0.287557	-3.42268	0.000620059	0.00367601	FALSE	1.54281	0.624882	0.727888	-0.944179	-1.04909	-0.83865	-0.063659
Zm00001eb049310	727.572	-0.984131	0.367367	-2.67887	0.00738701	0.0278502	FALSE	-0.357214	0.547169	1.86197	-1.24734	-0.695485	-0.22859	0.119488
Zm00001eb159930	429.443	-0.984038	0.425325	-2.31362	0.0206888	0.0630022	FALSE	0.354679	0.66231	1.67954	-0.191044	-0.272572	-1.19042	-1.0425
Zm00001eb254690	140.669	-0.983602	0.476841	-2.06275	0.0391365	0.103617	FALSE	-0.345408	1.10648	1.70099	-0.937119	-0.479184	-0.290096	-0.755673
Zm00001eb289270	336.039	-0.983089	0.328822	-2.98973	0.00279226	0.0127957	FALSE	1.48486	0.321624	1.14724	-0.437611	-0.637653	-1.02043	-0.858033
Zm00001eb010660	172.547	-0.982991	0.50432	-1.94914	0.0512783	0.12696	FALSE	0.093096	1.10325	1.47026	-0.666542	-0.651886	-0.02814	-1.32003
Zm00001eb376970	5091.92	-0.982981	0.296098	-3.31978	0.000900868	0.00504264	FALSE	0.443611	0.62902	1.603	-1.11666	-0.808315	-0.947995	0.197335
Zm00001eb292060	5426.63	-0.982802	0.255847	-3.84137	0.000122351	0.000931799	FALSE	1.4827	0.065104	1.27445	-0.910633	-0.898479	-0.614666	-0.398482
Zm00001eb143480	968.653	-0.982521	0.257501	-3.8156	0.000135853	0.00102128	FALSE	0.648751	1.36675	1.08742	-0.865817	-0.66083	-1.01174	-0.564535
Zm00001eb015940	2836.19	-0.982172	0.272239	-3.60775	0.000308859	0.00203768	FALSE	0.421553	0.937397	1.48207	-1.23868	-0.737852	-0.81606	-0.048428
Zm00001eb254820	140.861	-0.982168	0.478727	-2.05163	0.0402061	0.105678	FALSE	-0.372149	1.11036	1.70271	-0.935057	-0.479467	-0.291348	-0.735045
Zm00001eb290460	1008.18	-0.981772	0.281531	-3.48726	0.000487997	0.00299593	FALSE	-0.040681	0.399586	0.933473	-1.68872	-1.04067	0.714647	0.722365
Zm00001eb351310	693.535	-0.981718	0.271531	-3.61549	0.000299785	0.00198766	FALSE	0.350543	0.705466	1.59304	-1.26289	-1.05491	-0.364468	0.033218
Zm00001eb153880	1513.04	-0.981439	0.348591	-2.81544	0.00487098	0.0200532	FALSE	0.024519	0.762951	1.78124	-0.756164	-0.808397	-1.00954	0.005395
Zm00001eb279060	6093.3	-0.981147	0.183854	-5.33656	9.47266e-08	1.69716e-06	FALSE	0.566501	0.586507	0.8626	-1.38174	-1.49426	0.628786	0.231599
Zm00001eb310010	230.639	-0.981033	0.340472	-2.88139	0.00395928	0.0170045	FALSE	1.10943	0.863296	1.01406	-0.243729	-0.387969	-1.25635	-1.09874
Zm00001eb028570	435.471	-0.980833	0.358482	-2.73607	0.00621775	0.024266	FALSE	0.005365	1.30799	1.451	-1.12081	-0.415475	-0.59416	-0.633917
Zm00001eb211770	921.309	-0.980625	0.322762	-3.03823	0.00237976	0.0111885	FALSE	0.040094	-0.107391	0.349851	-1.10397	-1.08317	0.041602	1.86299
Zm00001eb070150	2163.33	-0.979133	0.315169	-3.10669	0.00189194	0.00928252	FALSE	1.32803	0.468409	0.750416	-1.06531	-0.985147	-1.03089	0.534489
Zm00001eb153460	467.77	-0.979038	0.33335	-2.93697	0.00331439	0.0147469	FALSE	0.497179	1.76236	0.60902	-0.981549	-0.493235	-0.475579	-0.9182
Zm00001eb147410	805.63	-0.978692	0.270405	-3.61935	0.000295345	0.00196241	FALSE	1.03099	0.644908	1.41355	-0.637406	-0.788096	-1.06787	-0.596068
Zm00001eb247070	633.823	-0.978682	0.355891	-2.74995	0.0059605	0.0234686	FALSE	2.00328	0.006202	0.402119	-0.86592	-0.760834	-0.699384	-0.085465
Zm00001eb213750	5693.39	-0.978659	0.363386	-2.69317	0.00707766	0.0269158	FALSE	-0.446523	0.688461	1.56014	-1.06728	-0.855936	-0.651312	0.772458
Zm00001eb057880	30.6428	-0.978586	0.623916	-1.56846	0.116775	0.234366	FALSE	1.66206	0.700015	0.471226	-0.274316	-1.27281	-0.682139	-0.604044
Zm00001eb374690	811.536	-0.978266	0.351036	-2.78679	0.00532324	0.021474	FALSE	0.66057	-0.167779	0.503802	-1.01159	-1.24422	-0.349545	1.60876
Zm00001eb040130	768.592	-0.977973	0.320087	-3.05533	0.00224811	0.0106855	FALSE	0.082548	0.991752	1.70609	-0.86884	-0.651089	-0.880905	-0.37956
Zm00001eb043240	731.138	-0.97783	0.269887	-3.62311	0.000291082	0.00193892	FALSE	1.43483	0.436677	0.732064	-1.17875	-1.22017	0.294821	-0.499477
Zm00001eb073430	428.356	-0.977801	0.345025	-2.834	0.0045969	0.0191548	FALSE	1.22467	0.470138	0.11801	-1.08266	-1.31931	-0.473197	1.06235
Zm00001eb128830	2200.64	-0.977445	0.371368	-2.63201	0.00848815	0.0310843	FALSE	-0.426818	0.876194	1.62534	-0.874224	-0.903043	-0.77498	0.477534
Zm00001eb024200	10661	-0.977359	0.29082	-3.3607	0.000777459	0.00446578	FALSE	0.361353	0.836492	1.66632	-0.762883	-0.759794	-1.07941	-0.262074
Zm00001eb198300	6330.46	-0.977322	0.305525	-3.19883	0.00137987	0.00720408	FALSE	-0.039366	1.11108	1.66635	-0.618153	-0.443198	-0.877214	-0.799496
Zm00001eb043030	608.747	-0.977247	0.348186	-2.80668	0.00500549	0.0204686	FALSE	0.629613	0.942034	1.09637	-0.525741	-1.64404	-0.702298	0.204065
Zm00001eb280840	205.436	-0.977046	0.346218	-2.82205	0.00477177	0.0197379	FALSE	0.865609	0.073866	0.967787	-1.38033	-1.34843	0.76263	0.058872
Zm00001eb022960	457.59	-0.976351	0.357275	-2.73277	0.0062804	0.0244542	FALSE	0.192704	0.715724	1.83988	-0.846273	-0.364753	-0.637056	-0.900221
Zm00001eb272330	1611.81	-0.976289	0.232126	-4.20585	2.60101e-05	0.000246501	FALSE	0.418963	1.22619	1.35999	-1.04964	-0.880618	-0.628067	-0.446824
Zm00001eb100470	453.397	-0.975729	0.274354	-3.55646	0.000375892	0.00240095	FALSE	0.749941	1.57736	0.640408	-1.04905	-0.999683	-0.366604	-0.552373
Zm00001eb187140	5285.41	-0.975681	0.311897	-3.12822	0.00175871	0.00875882	FALSE	-0.337434	0.82658	1.84535	-0.952984	-0.866354	-0.202051	-0.313102
Zm00001eb088370	1188.15	-0.975457	0.314515	-3.10147	0.00192564	0.00941174	FALSE	0.080694	0.77197	1.73503	-1.25671	-0.654368	-0.612894	-0.063729
Zm00001eb280090	7832.52	-0.97528	0.292443	-3.33494	0.00085318	0.00481764	FALSE	0.255593	-0.214147	-0.290908	-1.0826	-0.949188	0.389238	1.89201
Zm00001eb099850	817.909	-0.974968	0.426856	-2.28406	0.0223678	0.0669418	FALSE	2.04549	-0.163191	0.420971	-0.585897	-0.50888	-0.978191	-0.2303
Zm00001eb369350	1576.83	-0.97413	0.438447	-2.22177	0.0262985	0.0762109	FALSE	-0.386434	2.1091	0.393337	-0.395027	-0.557628	-0.3537	-0.809651
Zm00001eb251650	4862.77	-0.974038	0.528072	-1.84452	0.0651078	0.151582	FALSE	-1.09588	1.60716	0.871411	-0.820977	-0.557059	0.483674	-0.488332
Zm00001eb390190	11780.3	-0.974009	0.288842	-3.37212	0.000745926	0.00430587	FALSE	0.035798	1.13634	1.55781	-0.726694	-0.994544	-0.861233	-0.147478
Zm00001eb146990	33.2089	-0.9739	0.72213	-1.34865	0.17745	0.318907	FALSE	-0.319247	1.03775	1.51539	-0.215203	-1.51392	-0.424271	-0.080506
Zm00001eb270920	1432.6	-0.973824	0.394413	-2.46904	0.0135475	0.0449917	FALSE	-0.657611	1.13142	1.7031	-0.660069	-0.805602	-0.512557	-0.198684
Zm00001eb328510	109.37	-0.97322	0.628794	-1.54776	0.121681	0.241819	FALSE	-0.490356	-0.475993	-0.484154	-0.559726	-0.526961	2.13142	0.405771
Zm00001eb270960	315.888	-0.973153	0.436609	-2.22889	0.0258213	0.0750964	FALSE	0.591387	0.707316	1.38014	0.254505	-0.521559	-1.2059	-1.2059
Zm00001eb127750	2055.8	-0.972807	0.4129	-2.35604	0.0184711	0.0575999	FALSE	1.24676	-0.434061	-0.466165	-0.899051	-0.945347	-0.030843	1.52871
Zm00001eb149980	2899.72	-0.972731	0.336892	-2.88737	0.00388477	0.016741	FALSE	0.123599	0.952526	1.09784	-1.15459	-0.931794	-0.95676	0.869174
Zm00001eb177980	968.672	-0.972606	0.301437	-3.22656	0.00125287	0.00664886	FALSE	0.793362	0.982666	1.13589	-1.12487	-0.814621	-1.08327	0.110838
Zm00001eb188180	2444.68	-0.971948	0.220781	-4.40232	1.07101e-05	0.00011421	FALSE	0.994651	0.961757	1.20128	-0.85075	-0.495299	-1.03329	-0.778353
Zm00001eb288700	1810.61	-0.971921	0.373953	-2.59905	0.00934827	0.0335512	FALSE	2.03608	-0.48004	0.155464	-0.961086	-0.802368	-0.098399	0.150348
Zm00001eb372770	1727.61	-0.971809	0.343731	-2.82724	0.00469516	0.0194902	FALSE	1.68189	-0.207672	-0.038928	-1.09593	-1.02408	-0.224391	0.909101
Zm00001eb029550	1469.27	-0.971446	0.415187	-2.33978	0.0192951	0.0597334	FALSE	-0.564273	1.03591	1.77497	-0.724836	-0.504825	-0.7919	-0.225039
Zm00001eb211400	809.812	-0.970944	0.394755	-2.45961	0.0139088	0.0459626	FALSE	1.75025	-0.159736	0.963819	-0.651514	-0.157076	-0.940795	-0.804946
Zm00001eb092840	2088.86	-0.970603	0.236229	-4.10874	3.97825e-05	0.000353326	FALSE	0.647856	0.740568	1.64506	-0.801875	-0.629866	-0.840212	-0.76153
Zm00001eb411600	315.875	-0.970038	0.44259	-2.19173	0.0283991	0.0808412	FALSE	1.00744	1.08389	0.8695	-0.48464	-0.134353	-0.998887	-1.34295
Zm00001eb039770	4408.39	-0.969968	0.261706	-3.70632	0.000210289	0.00146511	FALSE	0.868271	0.471983	1.63484	-0.690962	-0.581156	-0.644838	-1.05814
Zm00001eb028440	8650.69	-0.969828	0.281377	-3.44672	0.000567428	0.00340603	FALSE	0.021137	1.23221	0.825224	-1.19097	-1.16398	-0.564929	0.84131
Zm00001eb110080	5973.3	-0.969707	0.297846	-3.25573	0.00113103	0.00609586	FALSE	1.77135	-0.084084	0.988906	-0.621428	-0.877516	-0.707292	-0.469938
Zm00001eb202090	115.053	-0.969469	0.54141	-1.79064	0.0733514	0.165807	FALSE	-0.021006	0.597316	1.67943	-0.377702	-1.18046	-1.07089	0.373306
Zm00001eb251580	422.908	-0.968711	0.367354	-2.637	0.00836434	0.0307335	FALSE	0.093154	0.516295	1.82295	-1.10831	-0.739711	-0.76935	0.184974
Zm00001eb302520	6347.75	-0.968637	0.440258	-2.20016	0.0277957	0.0795364	FALSE	2.23712	-0.342014	-0.086889	-0.613195	-0.393654	-0.497345	-0.304027
Zm00001eb026810	7305.01	-0.968532	0.295392	-3.27881	0.00104247	0.00570175	FALSE	-0.055268	1.16667	1.61206	-0.811541	-0.733687	-0.859371	-0.318863
Zm00001eb173990	2893.31	-0.968406	0.314199	-3.08215	0.00205514	0.00993791	FALSE	0.080439	0.735183	1.81867	-0.919139	-0.688854	-0.900129	-0.126167
Zm00001eb049190	2135.48	-0.968368	0.217828	-4.44556	8.76636e-06	9.55589e-05	FALSE	0.584055	0.8041	1.08566	-1.49172	-1.18326	-0.206072	0.407241
Zm00001eb213580	221.555	-0.968041	0.343664	-2.81683	0.00485008	0.0199938	FALSE	1.4758	0.141005	1.0443	-1.04909	-1.2401	-0.141368	-0.230557
Zm00001eb382690	1702.73	-0.967782	0.322883	-2.99731	0.00272372	0.012534	FALSE	0.909749	0.834567	1.28373	-0.511229	-0.379257	-1.33156	-0.805998
Zm00001eb305750	2052.88	-0.967634	0.248364	-3.89603	9.77812e-05	0.000765946	FALSE	0.308968	0.825746	1.73024	-0.917946	-0.934439	-0.490635	-0.521936
Zm00001eb345040	832.638	-0.967354	0.291785	-3.3153	0.000915463	0.0051029	FALSE	0.523339	0.43937	1.53841	-0.955754	-1.3358	-0.57733	0.367765
Zm00001eb174320	308.957	-0.967307	0.359176	-2.69313	0.00707854	0.0269158	FALSE	0.20407	0.620334	1.91142	-0.662375	-0.732494	-0.821515	-0.519444
Zm00001eb230550	379.799	-0.966876	0.356826	-2.70966	0.00673528	0.0258583	FALSE	0.528875	0.873519	1.5244	-0.221589	-0.664155	-1.1942	-0.846846
Zm00001eb350510	1826	-0.966663	0.5035	-1.91989	0.054872	0.133414	FALSE	-0.784114	1.19378	1.59149	-0.686904	-0.377926	-0.035615	-0.900711
Zm00001eb431860	212.834	-0.96653	0.343825	-2.81111	0.00493712	0.0202851	FALSE	0.241479	0.041151	0.211205	-1.17987	-1.37383	1.52712	0.532746
Zm00001eb298510	578.681	-0.966521	0.474234	-2.03807	0.0415432	0.108231	FALSE	-0.967058	1.39085	1.27143	-0.914078	-0.660137	0.282407	-0.403409
Zm00001eb316520	512.96	-0.966339	0.666423	-1.45004	0.147048	0.278059	FALSE	-0.737679	1.97652	-0.265473	-0.375718	-0.585986	0.699182	-0.710851
Zm00001eb122470	1088.42	-0.966147	0.278095	-3.47416	0.000512462	0.00312249	FALSE	0.621033	0.756574	1.58956	-0.536973	-0.425633	-0.867007	-1.13755
Zm00001eb382120	235.403	-0.965793	0.580306	-1.66428	0.0960563	0.202893	FALSE	-0.722216	0.617532	2.01438	-0.228252	-0.563626	-0.409276	-0.708546
Zm00001eb029080	675.252	-0.965535	0.390162	-2.4747	0.0133348	0.044412	FALSE	-0.077614	-0.151737	0.263892	-0.925948	-0.937399	-0.202053	2.03086
Zm00001eb127670	8658.04	-0.96509	0.246293	-3.91847	8.91129e-05	0.000707554	FALSE	0.786521	-0.071972	0.831525	-1.30475	-1.32574	-0.022083	1.1065
Zm00001eb366430	3627.24	-0.964685	0.327013	-2.94999	0.00317785	0.0142408	FALSE	-0.57008	0.714204	1.34911	-1.03869	-1.20225	-0.146249	0.893954
Zm00001eb428490	704.891	-0.964625	0.377118	-2.55789	0.0105309	0.0367814	FALSE	0.15525	0.129374	-0.629451	-1.14419	-0.819027	1.83205	0.475987
Zm00001eb327680	793.453	-0.964497	0.394565	-2.44445	0.0145072	0.0476361	FALSE	1.99271	-0.355272	-0.081937	-0.950619	-0.849874	-0.224069	0.469066
Zm00001eb047570	1043.36	-0.963965	0.318944	-3.02236	0.00250811	0.0116947	FALSE	1.58164	0.252437	1.04073	-0.712579	-0.701309	-1.10783	-0.353091
Zm00001eb120760	1103.78	-0.963862	0.256051	-3.76434	0.000166989	0.00120624	FALSE	0.588257	1.03379	1.45332	-0.726629	-0.783181	-1.01323	-0.552339
Zm00001eb249380	2424.17	-0.963777	0.349923	-2.75425	0.0058826	0.0232253	FALSE	1.99636	-0.323421	-0.012538	-0.8477	-1.07364	0.083374	0.177563
Zm00001eb194380	118.436	-0.963518	0.434042	-2.21987	0.0264276	0.0765136	FALSE	0.47156	1.19041	0.75157	-1.17683	-1.15676	0.691288	-0.771236
Zm00001eb202460	252.102	-0.963104	0.395479	-2.43529	0.0148801	0.0485443	FALSE	0.08559	0.517643	1.71405	-1.10893	-0.882619	-0.764931	0.439202
Zm00001eb407080	2093.59	-0.96309	0.347461	-2.77179	0.00557483	0.0222742	FALSE	2.11277	-0.157138	0.230057	-0.924505	-0.641698	-0.298913	-0.320568
Zm00001eb163710	977.087	-0.963055	0.440773	-2.18492	0.0288946	0.081964	FALSE	2.20788	0.055609	-0.266334	-0.630067	-0.326261	-0.575769	-0.465062
Zm00001eb324750	719.094	-0.962232	0.393986	-2.4423	0.014594	0.0478876	FALSE	-0.45232	1.12005	1.71627	-0.42086	-0.947282	-0.458677	-0.557183
Zm00001eb308830	320.211	-0.962011	0.374572	-2.56829	0.01022	0.0359377	FALSE	1.85146	-0.200054	0.439111	-1.14326	-0.921933	0.288957	-0.314276
Zm00001eb019510	1954.57	-0.961702	0.438233	-2.1945	0.0281994	0.0803956	FALSE	-0.751487	0.994584	1.82687	-0.638544	-0.527525	-0.53585	-0.368047
Zm00001eb297970	562.577	-0.961675	0.28358	-3.3912	0.000695885	0.00405465	FALSE	1.41062	0.606145	1.03547	-0.576867	-1.17239	-0.566662	-0.736316
Zm00001eb298370	816.958	-0.961615	0.286385	-3.35777	0.000785729	0.00450357	FALSE	0.779985	-0.105391	0.030175	-1.23097	-1.27203	0.33813	1.46011
Zm00001eb176670	191.663	-0.961395	0.369002	-2.60539	0.0091769	0.0330485	FALSE	0.454504	1.4591	1.10899	-0.748684	-0.721189	-0.503896	-1.04883
Zm00001eb395560	545.439	-0.96132	0.359913	-2.67098	0.00756308	0.0283878	FALSE	-0.260395	0.522096	1.92145	-1.1238	-0.769616	-0.332508	0.042768
Zm00001eb095000	1713.99	-0.961305	0.271138	-3.54544	0.000391958	0.00248738	FALSE	1.64826	0.248099	0.875362	-0.872337	-1.07196	-0.732337	-0.095083
Zm00001eb328520	625.011	-0.961222	0.375522	-2.55969	0.0104765	0.0366392	FALSE	-0.074688	0.166097	1.76504	-0.994916	-0.970559	-0.621389	0.730417
Zm00001eb430820	193.629	-0.960984	0.348714	-2.7558	0.00585494	0.0231396	FALSE	0.641748	0.384794	0.090839	-1.62051	-1.1684	0.983494	0.688029
Zm00001eb403080	308.011	-0.960906	0.378493	-2.53877	0.0111243	0.0384363	FALSE	-0.166389	1.32554	1.2491	-1.2285	-0.783576	-0.674174	0.278002
Zm00001eb390920	230.741	-0.960504	0.552725	-1.73776	0.0822533	0.180973	FALSE	2.24633	-0.326174	-0.226698	-0.275843	-0.565309	-0.289512	-0.562794
Zm00001eb431730	3784.89	-0.960384	0.299974	-3.20156	0.00136687	0.00714906	FALSE	1.51407	0.64278	0.713621	-0.806644	-0.890394	-1.15822	-0.015215
Zm00001eb247320	357.57	-0.959953	0.505733	-1.89814	0.0576775	0.138359	FALSE	0.610701	-0.485443	-0.366149	-0.763959	-0.777983	2.00479	-0.221954
Zm00001eb391070	4445.04	-0.959891	0.302447	-3.17374	0.00150486	0.00771713	FALSE	-0.415137	0.900987	1.67269	-1.01587	-1.07001	-0.174922	0.102267
Zm00001eb253140	6246.1	-0.959305	0.343999	-2.78868	0.00529232	0.0213744	FALSE	1.95473	-0.043689	0.52465	-0.707677	-0.741261	-0.920419	-0.066339
Zm00001eb110340	1424.26	-0.959261	0.258563	-3.70997	0.000207286	0.00144851	FALSE	0.398991	1.06098	0.264361	-1.38521	-1.26787	-0.121978	1.05074
Zm00001eb422560	979.081	-0.959069	0.269967	-3.55255	0.000381524	0.00243192	FALSE	0.694583	0.623468	1.66332	-1.06176	-0.573798	-0.668077	-0.677735
Zm00001eb247460	2502.37	-0.95885	0.325564	-2.9452	0.00322746	0.0144362	FALSE	2.01342	-0.167704	0.500068	-0.721998	-0.922214	-0.509021	-0.192553
Zm00001eb329930	149.105	-0.958779	0.470478	-2.03788	0.0415618	0.108234	FALSE	0.537765	0.833868	1.54558	-0.612749	-0.479537	-1.33439	-0.490543
Zm00001eb126900	2658.06	-0.958656	0.299711	-3.1986	0.00138096	0.00720408	FALSE	0.479507	0.528285	1.7908	-0.823637	-0.700238	-0.248223	-1.02649
Zm00001eb374870	508.289	-0.957962	0.340866	-2.81038	0.00494835	0.0203151	FALSE	1.17545	0.380464	1.40789	-0.634415	-0.608687	-1.20533	-0.515372
Zm00001eb079360	771.191	-0.957756	0.252661	-3.79068	0.000150236	0.00110972	FALSE	1.11681	0.532655	0.992451	-1.24564	-1.26263	-0.472577	0.338934
Zm00001eb341080	137.789	-0.957476	0.632834	-1.513	0.13028	0.254863	FALSE	-0.719539	1.2119	1.56888	0.07351	-0.810534	-0.742875	-0.58134
Zm00001eb161770	3697.2	-0.95746	0.245365	-3.90219	9.53264e-05	0.000748802	FALSE	1.28309	0.457734	1.30631	-0.697529	-0.752542	-1.03255	-0.564512
Zm00001eb387340	836.338	-0.957375	0.305371	-3.13512	0.00171783	0.00858959	FALSE	-0.232182	1.36384	1.21974	-1.33074	-0.905946	-0.051994	-0.062718
Zm00001eb361490	170.323	-0.957305	0.459789	-2.08205	0.0373376	0.100012	FALSE	0.625946	0.578933	1.08351	-0.560484	-1.50458	-0.976584	0.753257
Zm00001eb385130	193.85	-0.956969	0.373696	-2.56082	0.0104425	0.0365756	FALSE	0.464444	0.121074	1.19689	-1.29643	-1.26917	-0.216218	0.999412
Zm00001eb111910	7144.79	-0.956708	0.330576	-2.89406	0.00380293	0.0164567	FALSE	-0.431318	1.3297	1.56724	-0.767566	-0.721053	-0.529026	-0.447975
Zm00001eb205190	4215.99	-0.95657	0.294436	-3.24882	0.00115885	0.00621976	FALSE	1.6982	0.637171	0.536627	-0.958386	-0.54073	-1.05308	-0.319803
Zm00001eb317640	55.8292	-0.956345	0.665047	-1.43801	0.15043	0.282546	FALSE	0.300103	0.845481	1.37993	-0.086513	-1.22628	0.11623	-1.32896
Zm00001eb327480	2191.25	-0.956083	0.406106	-2.35427	0.0185591	0.0578258	FALSE	-0.427051	1.52128	1.32461	-0.856972	-0.220387	-0.489106	-0.852375
Zm00001eb140540	1149.14	-0.955957	0.28457	-3.3593	0.000781396	0.00448287	FALSE	1.49984	0.027154	1.16367	-0.992323	-0.990983	-0.652594	-0.05476
Zm00001eb344850	900.574	-0.955703	0.31649	-3.01969	0.00253033	0.0117865	FALSE	1.06932	0.038541	1.59491	-0.693271	-1.06946	-0.820115	-0.11992
Zm00001eb394460	728.488	-0.955398	0.285124	-3.35082	0.000805734	0.00459705	FALSE	1.44308	0.279908	0.623407	-0.973483	-1.51798	-0.234106	0.379175
Zm00001eb120090	530.862	-0.95505	0.472557	-2.02102	0.0432772	0.111563	FALSE	-0.721834	1.05455	1.67709	-1.10008	-0.292524	-0.124193	-0.493016
Zm00001eb420470	1496.1	-0.955016	0.256721	-3.72006	0.000199177	0.00140236	FALSE	1.04207	0.241964	1.57812	-1.12365	-0.813365	-0.382054	-0.543086
Zm00001eb329740	189.932	-0.954978	0.484593	-1.97068	0.0487607	0.122236	FALSE	-0.565924	1.67315	1.21481	-0.575482	-0.561972	-0.425072	-0.759511
Zm00001eb013300	1667.36	-0.95497	0.324644	-2.94159	0.00326529	0.0145766	FALSE	-0.404956	0.727133	1.82037	-0.928954	-1.03515	0.057592	-0.236036
Zm00001eb104020	107.196	-0.954889	0.487796	-1.95756	0.050282	0.125141	FALSE	0.858135	0.239164	0.976054	-1.16208	-0.964008	-0.96676	1.01949
Zm00001eb221130	9235.92	-0.95467	0.558168	-1.71036	0.0871985	0.188846	FALSE	-1.19124	0.872555	1.18447	-0.769524	-0.720792	1.05721	-0.432684
Zm00001eb302680	5109.58	-0.954536	0.33164	-2.87823	0.00399911	0.0171426	FALSE	-0.506385	0.529054	1.86203	-0.861627	-1.11501	-0.011612	0.103554
Zm00001eb325740	144.801	-0.954536	0.413475	-2.30857	0.0209674	0.0636393	FALSE	1.51268	0.29737	0.952285	-0.199162	-0.284768	-1.12928	-1.14913
Zm00001eb417960	1463.37	-0.954517	0.324285	-2.94345	0.00324581	0.0145035	FALSE	-0.39229	1.1543	1.63352	-1.01261	-0.805398	-0.241361	-0.336162
Zm00001eb321670	64.9718	-0.954187	0.500251	-1.90742	0.0564667	0.136261	FALSE	1.33186	0.996441	0.736952	-0.423236	-0.653058	-0.763669	-1.22529
Zm00001eb044380	3824.19	-0.954034	0.347192	-2.74786	0.00599862	0.0235646	FALSE	-0.214125	0.687027	1.90146	-0.899181	-0.627701	-0.814211	-0.033273
Zm00001eb405040	1397.52	-0.953873	0.278772	-3.4217	0.000622309	0.003687	FALSE	0.184252	0.93617	1.6573	-0.947625	-0.910515	-0.770544	-0.14904
Zm00001eb120910	5442.72	-0.953713	0.391106	-2.4385	0.0147482	0.0482239	FALSE	2.19749	-0.167763	0.091418	-0.521423	-0.461788	-0.600344	-0.537587
Zm00001eb003060	142.061	-0.953476	0.619297	-1.53961	0.123655	0.245064	FALSE	0.771236	1.14514	1.2159	-0.899486	-0.899486	-0.433821	-0.899486
Zm00001eb023200	44.4718	-0.952864	0.712914	-1.33658	0.181361	0.324249	FALSE	1.04707	0.254964	1.18185	-1.79007	-0.114996	-0.457923	-0.120901
Zm00001eb385150	6693.89	-0.952552	0.38343	-2.48429	0.0129808	0.0435363	FALSE	-0.29763	0.725386	1.91115	-0.617804	-0.632169	-0.967868	-0.121064
Zm00001eb400080	117.599	-0.952415	0.660372	-1.44224	0.149235	0.280939	FALSE	-0.827859	1.99467	-0.059569	-0.323018	-0.844249	0.53672	-0.476693
Zm00001eb275620	277.899	-0.952323	0.316617	-3.00781	0.00263141	0.0121843	FALSE	0.121206	0.363784	0.346305	-1.63183	-1.1124	0.995696	0.917238
Zm00001eb227130	1902.73	-0.95212	0.336811	-2.82687	0.00470054	0.0195039	FALSE	1.54922	0.041438	0.963787	-0.716456	-1.03716	-1.01671	0.215877
Zm00001eb053260	2390.86	-0.951895	0.290325	-3.27873	0.00104277	0.00570175	FALSE	1.24704	0.192477	1.45759	-0.54018	-0.584694	-1.08514	-0.687089
Zm00001eb369170	1514.53	-0.951758	0.259341	-3.66991	0.00024264	0.0016602	FALSE	1.71229	0.259262	0.345798	-1.23338	-1.15975	0.11589	-0.040105
Zm00001eb360330	297.61	-0.951631	0.301246	-3.15898	0.00158324	0.00804605	FALSE	0.605677	0.819541	1.52106	-1.18382	-0.95955	-0.442634	-0.360279
Zm00001eb071750	174.645	-0.951513	0.36792	-2.58619	0.00970423	0.034521	FALSE	0.612603	0.61982	1.60245	-0.966054	-1.12274	-0.689709	-0.056374
Zm00001eb401990	18854.9	-0.950645	0.311482	-3.05201	0.00227315	0.0107824	FALSE	1.65108	-0.092151	0.632641	-0.898954	-1.12683	-0.704836	0.539051
Zm00001eb409770	799.739	-0.950573	0.260585	-3.64784	0.000264457	0.00178516	FALSE	1.00969	1.34726	0.756046	-0.829111	-0.482622	-0.740605	-1.06065
Zm00001eb188540	3840.87	-0.950521	0.30509	-3.11554	0.00183605	0.00905856	FALSE	0.210413	-0.121093	-0.13335	-1.06888	-0.972234	0.131075	1.95406
Zm00001eb296350	969.01	-0.950475	0.383196	-2.48039	0.013124	0.0438825	FALSE	1.93887	-0.320524	0.37796	-0.766618	-0.918181	-0.663651	0.352145
Zm00001eb282130	795.147	-0.950139	0.320652	-2.96314	0.00304514	0.0137651	FALSE	-0.195347	0.619007	1.37237	-1.38032	-1.00227	-0.260524	0.847082
Zm00001eb190820	540.187	-0.949929	0.268056	-3.54378	0.000394439	0.00250142	FALSE	1.23735	0.635061	1.24288	-0.60421	-1.00299	-0.833617	-0.674476
Zm00001eb016640	849.521	-0.949854	0.285514	-3.32682	0.000878427	0.0049348	FALSE	1.56851	0.357842	0.972211	-0.628276	-1.20638	-0.690818	-0.373091
Zm00001eb426270	852.434	-0.949235	0.389211	-2.43887	0.0147333	0.0481835	FALSE	2.0416	-0.31798	0.070615	-0.59773	-1.16373	0.066326	-0.099093
Zm00001eb376780	1299.93	-0.949223	0.27695	-3.42741	0.000609361	0.00362064	FALSE	1.51161	0.206518	0.414648	-1.07119	-1.38375	-0.278434	0.600599
Zm00001eb156710	4591.22	-0.949185	0.374305	-2.53586	0.0112172	0.0387001	FALSE	2.08517	-0.06267	0.333201	-0.32564	-0.533772	-0.863702	-0.63259
Zm00001eb230310	326.469	-0.94918	0.287609	-3.30025	0.000966001	0.00533992	FALSE	0.872405	0.673505	1.01694	-1.4932	-1.18379	-0.181286	0.295421
Zm00001eb387030	3310.58	-0.948909	0.404481	-2.34599	0.0189765	0.0589169	FALSE	1.83272	-0.498329	-0.340113	-0.662158	-1.20558	0.480282	0.393172
Zm00001eb000710	987.971	-0.948846	0.319908	-2.96599	0.00301707	0.0136648	FALSE	1.42065	0.605086	0.75098	-1.22516	-0.674101	-1.03508	0.157625
Zm00001eb268550	372.003	-0.948705	0.315192	-3.00993	0.00261309	0.0121115	FALSE	0.346061	0.99515	1.6182	-0.951886	-0.581219	-0.641514	-0.784793
Zm00001eb404350	1048.38	-0.948499	0.36284	-2.6141	0.0089463	0.0323681	FALSE	1.04136	0.188197	1.36022	-0.548557	-1.20902	-1.09471	0.262516
Zm00001eb281480	1011.75	-0.948124	0.264773	-3.5809	0.000342414	0.00221903	FALSE	1.07335	0.505346	0.829746	-1.19505	-1.32361	-0.544015	0.654239
Zm00001eb102490	102.616	-0.948109	0.5015	-1.89055	0.0586851	0.140109	FALSE	-0.126213	1.51344	1.20662	-0.199999	-0.362378	-1.05362	-0.977857
Zm00001eb004040	48.9661	-0.948018	0.589152	-1.60912	0.107589	0.220826	FALSE	-0.451482	0.49385	2.06112	-0.775861	-0.703017	-0.392324	-0.232284
Zm00001eb051950	780.141	-0.947975	0.27148	-3.49188	0.000479639	0.00295142	FALSE	0.088232	1.23923	1.28882	-1.16103	-1.13779	-0.385142	0.067671
Zm00001eb338240	466.491	-0.947963	0.396322	-2.3919	0.0167613	0.0532926	FALSE	2.11093	-0.283536	0.268741	-0.769691	-0.76342	-0.451241	-0.111787
Zm00001eb181260	2067.67	-0.947527	0.222783	-4.25314	2.10792e-05	0.000206485	FALSE	0.241785	0.812739	1.11784	-1.22637	-1.5133	0.088146	0.479165
Zm00001eb356240	3117.21	-0.946848	0.295913	-3.19975	0.00137548	0.00718602	FALSE	1.93792	0.016947	0.543908	-0.706727	-1.09371	-0.415725	-0.282606
Zm00001eb368000	7348.17	-0.946691	0.702034	-1.3485	0.177499	0.318964	FALSE	0.402852	-0.584268	-0.333698	-0.58955	-0.583942	-0.434512	2.12312
Zm00001eb314490	4127.95	-0.946569	0.346133	-2.7347	0.00624375	0.024342	FALSE	2.09582	-0.032136	0.346581	-0.473222	-0.565928	-0.718614	-0.652503
Zm00001eb292620	243.931	-0.946491	0.423054	-2.23728	0.0252678	0.0738844	FALSE	1.07458	-0.527496	0.235551	-1.59567	-0.784118	0.604834	0.992325
Zm00001eb191380	871.671	-0.945932	0.271244	-3.48739	0.000487763	0.00299593	FALSE	0.157295	-0.029914	0.098196	-1.14445	-1.22799	0.424405	1.72246
Zm00001eb169630	329.175	-0.945637	0.460848	-2.05195	0.0401744	0.105662	FALSE	-0.104243	1.20553	1.42954	-0.022698	-1.32038	-0.447304	-0.740443
Zm00001eb144440	127.979	-0.945405	0.609773	-1.55042	0.121041	0.24088	FALSE	1.382	-0.357058	-0.093127	-0.542284	-0.930834	1.42107	-0.879757
Zm00001eb424290	8398.58	-0.944077	0.234697	-4.02253	5.75754e-05	0.000483058	FALSE	0.762875	0.650609	1.61368	-0.731917	-0.790743	-0.973618	-0.530891
Zm00001eb392570	2460.76	-0.944025	0.225298	-4.19011	2.78819e-05	0.000261582	FALSE	0.39812	1.12071	1.44856	-1.01408	-0.96728	-0.629174	-0.356856
Zm00001eb015460	179.444	-0.943907	0.382378	-2.46852	0.0135673	0.0450382	FALSE	1.34505	0.157438	0.342837	-1.44335	-1.10575	-0.145558	0.849334
Zm00001eb384140	395.486	-0.94381	0.302746	-3.1175	0.00182394	0.00902101	FALSE	0.248419	0.778939	1.50246	-1.28079	-1.10951	-0.380404	0.240887
Zm00001eb104870	468.952	-0.943731	0.432498	-2.18205	0.0291062	0.0823637	FALSE	-0.873824	0.784805	0.572774	-1.06946	-0.944404	0.028101	1.50201
Zm00001eb013550	1676.67	-0.943398	0.219164	-4.30454	1.67337e-05	0.00016852	FALSE	0.590301	1.21701	1.26641	-0.957377	-0.964088	-0.744614	-0.407636
Zm00001eb169650	18.414	-0.943308	0.688964	-1.36917	0.170947	0.310149	FALSE	1.17269	0.577039	1.16073	-0.574173	-0.056283	-1.21911	-1.06089
Zm00001eb025890	155.572	-0.942734	0.512144	-1.84076	0.0656568	0.152512	FALSE	-0.146357	1.55971	1.17646	-0.452805	-0.607819	-0.307343	-1.22184
Zm00001eb191500	889.533	-0.942669	0.323439	-2.91452	0.0035624	0.0156151	FALSE	0.159661	1.44449	1.26174	-0.68051	-0.417909	-1.10311	-0.664368
Zm00001eb037690	204.722	-0.94245	0.533737	-1.76576	0.0774365	0.172759	FALSE	-0.538726	0.678101	1.49323	-0.594008	-0.959474	0.894161	-0.973279
Zm00001eb082140	76977.3	-0.942303	0.422423	-2.23071	0.0257003	0.0748496	FALSE	2.2311	-0.374033	-0.088561	-0.447107	-0.671486	-0.403836	-0.246079
Zm00001eb432720	136.003	-0.942252	0.610921	-1.54235	0.122989	0.243958	FALSE	1.96726	-0.569098	-0.714043	-0.78024	-0.60005	0.554224	0.141943
Zm00001eb190920	6369.48	-0.94164	0.268116	-3.51206	0.000444642	0.00277173	FALSE	1.81805	0.275147	0.744566	-0.825654	-0.535363	-0.792585	-0.684166
Zm00001eb096840	69.2186	-0.941623	0.726509	-1.29609	0.194943	0.341334	FALSE	-0.188326	-0.775627	-0.227516	-0.775627	-0.775627	0.955001	1.78772
Zm00001eb184310	2303.27	-0.941006	0.365094	-2.57744	0.00995364	0.0352001	FALSE	1.86669	-0.180164	0.56822	-0.926492	-0.670648	-0.892613	0.23501
Zm00001eb155920	3179.86	-0.940872	0.271071	-3.47094	0.000518634	0.00315391	FALSE	1.30415	0.308547	1.32535	-0.711037	-0.903434	-1.01515	-0.308432
Zm00001eb019320	265.56	-0.940866	0.396828	-2.37096	0.0177418	0.0557543	FALSE	-0.133351	0.757723	1.89087	-0.845412	-0.68473	-0.778823	-0.206276
Zm00001eb102790	1378.7	-0.940821	0.339852	-2.76832	0.00563454	0.0224599	FALSE	-0.103905	0.666865	1.92207	-0.82789	-0.677954	-0.825547	-0.153635
Zm00001eb335710	3782.07	-0.940736	0.389256	-2.41676	0.0156595	0.0505042	FALSE	2.02023	-0.612454	0.376682	-0.582635	-1.02135	-0.127517	-0.052952
Zm00001eb095200	1509.8	-0.940722	0.442216	-2.12729	0.0333958	0.0917245	FALSE	-0.781393	1.10231	1.75267	-0.604126	-0.54906	-0.381202	-0.539198
Zm00001eb337890	1415.39	-0.940711	0.328628	-2.86254	0.00420255	0.0178506	FALSE	1.85194	0.030704	0.771564	-0.423931	-0.445704	-0.933072	-0.851505
Zm00001eb114980	181.45	-0.940549	0.715879	-1.31384	0.1889	0.333577	FALSE	1.55738	0.462585	0.413069	-0.040008	-1.6441	-0.694498	-0.054431
Zm00001eb357670	9283.96	-0.940328	0.2241	-4.19601	2.71658e-05	0.000255507	FALSE	0.928709	0.794954	1.33977	-1.07118	-0.80426	-0.918527	-0.269461
Zm00001eb038950	1195.74	-0.940274	0.276595	-3.39946	0.000675181	0.00394635	FALSE	1.5807	0.125175	0.807203	-1.01763	-1.21802	-0.510548	0.233118
Zm00001eb317910	6560.44	-0.940034	0.265852	-3.53593	0.000406341	0.00256904	FALSE	0.274861	0.953901	1.66998	-0.855295	-0.600313	-0.936595	-0.506538
Zm00001eb024700	697.729	-0.939461	0.280676	-3.34713	0.000816523	0.00464298	FALSE	1.57041	0.697368	0.652877	-1.30684	-0.669178	-0.570897	-0.373735
Zm00001eb134670	382.985	-0.939427	0.356802	-2.63291	0.00846565	0.0310324	FALSE	1.06585	0.018828	1.60958	-1.01674	-0.671165	-0.127499	-0.878855
Zm00001eb073410	212.372	-0.939138	0.716658	-1.31044	0.190046	0.334992	FALSE	0.724796	0.734834	1.09492	-0.038627	-1.70364	-0.907173	0.094894
Zm00001eb440700	488.138	-0.939008	0.58936	-1.59327	0.1111	0.226067	FALSE	-0.991292	1.08398	1.73259	-0.42078	-0.471592	-0.412438	-0.520473
Zm00001eb034820	186.668	-0.938899	0.467186	-2.00969	0.0444642	0.113978	FALSE	1.94634	0.25373	0.318284	-0.168369	-0.476538	-1.07037	-0.803082
Zm00001eb320330	6542.68	-0.938631	0.317081	-2.96022	0.00307415	0.0138526	FALSE	1.74504	-0.015499	0.150672	-1.20991	-0.886792	-0.465421	0.681912
Zm00001eb150630	500.276	-0.938421	0.384514	-2.44053	0.0146656	0.0480463	FALSE	0.075314	1.54723	1.11839	-0.934593	-0.115774	-0.975165	-0.715401
Zm00001eb332960	411.735	-0.938219	0.401837	-2.33483	0.0195525	0.0603463	FALSE	-0.364405	0.198113	0.600511	-0.994913	-1.02802	-0.24455	1.83326
Zm00001eb261210	1586.47	-0.937562	0.287619	-3.25974	0.00111516	0.00603565	FALSE	1.53805	0.233445	1.11693	-0.803117	-0.752896	-1.00743	-0.324981
Zm00001eb148380	169.843	-0.937516	0.528682	-1.77331	0.0761777	0.170522	FALSE	-0.5829	1.35658	0.904498	-1.20346	-0.480594	0.816104	-0.810231
Zm00001eb221750	376.395	-0.937483	0.301189	-3.1126	0.00185444	0.00913073	FALSE	1.04725	0.525703	1.4596	-0.939993	-0.801298	-0.907489	-0.38377
Zm00001eb309560	922.891	-0.937324	0.357284	-2.62347	0.00870385	0.0316876	FALSE	-0.453631	1.4735	1.38791	-0.723122	-0.858534	-0.631569	-0.194556
Zm00001eb007730	7663.36	-0.937284	0.334679	-2.80055	0.00510161	0.0207661	FALSE	1.32844	0.590133	0.974785	-0.37718	-0.183337	-1.30752	-1.02532
Zm00001eb242980	23.8633	-0.936856	0.657158	-1.42562	0.153979	0.287186	FALSE	1.23914	0.422061	1.23327	-0.115331	-1.23625	-0.641876	-0.901014
Zm00001eb304220	23.8633	-0.936856	0.657158	-1.42562	0.153979	0.287186	FALSE	1.23914	0.422061	1.23327	-0.115331	-1.23625	-0.641876	-0.901014
Zm00001eb408940	145.151	-0.936761	0.485073	-1.93117	0.0534616	0.130786	FALSE	0.374044	1.19099	0.779388	-0.875416	-0.970057	0.751113	-1.25006
Zm00001eb012870	396.879	-0.93621	0.480261	-1.94938	0.0512504	0.126925	FALSE	-0.69447	0.710544	1.52665	-0.528037	-1.14512	-0.670836	0.801275
Zm00001eb019650	218.994	-0.935841	0.453294	-2.06454	0.0389668	0.103337	FALSE	0.069905	0.436207	-0.505437	-0.720457	-1.32763	1.78913	0.258284
Zm00001eb193160	2287.33	-0.935478	0.335687	-2.78675	0.00532389	0.021474	FALSE	1.00021	0.585685	1.25867	-1.00962	-0.617494	-1.29085	0.073395
Zm00001eb056320	1969.4	-0.935442	0.282766	-3.30819	0.000939025	0.00521398	FALSE	0.06504	0.774252	1.7736	-0.855281	-1.05948	-0.625608	-0.072529
Zm00001eb019860	210.742	-0.935327	0.525904	-1.77851	0.0753199	0.168963	FALSE	-0.535071	1.65779	0.640953	-0.665402	-0.811116	0.696867	-0.984024
Zm00001eb318350	281.538	-0.935315	0.513825	-1.8203	0.0687137	0.157662	FALSE	-0.268636	-0.111519	-0.244406	-0.541958	-1.18162	2.01336	0.334775
Zm00001eb371640	330.401	-0.935128	0.334922	-2.79208	0.00523711	0.0212111	FALSE	1.75054	0.109833	0.740265	-0.859018	-1.19	-0.462069	-0.089547
Zm00001eb047830	755.802	-0.934804	0.500662	-1.86714	0.0618826	0.14566	FALSE	-0.632056	1.46705	1.37898	-0.597935	-0.094985	-0.65246	-0.868588
Zm00001eb225610	1917.21	-0.934798	0.232582	-4.01922	5.83902e-05	0.000488796	FALSE	0.402011	1.07679	1.51295	-0.995637	-0.851411	-0.668631	-0.476068
Zm00001eb056240	3554.25	-0.934695	0.331632	-2.81847	0.00482524	0.0199171	FALSE	1.9442	-0.117572	0.146899	-0.940869	-0.940675	-0.498946	0.406958
Zm00001eb264400	601.452	-0.934639	0.368702	-2.53495	0.0112465	0.0387867	FALSE	-0.085901	0.339169	1.89362	-0.775984	-1.04976	-0.678293	0.357143
Zm00001eb009230	36.7031	-0.934567	0.591807	-1.57918	0.114296	0.230657	FALSE	1.61261	0.703992	0.589411	-0.235702	-1.1769	-0.72789	-0.765519
Zm00001eb003130	240.655	-0.934353	0.512041	-1.82476	0.0680366	0.156447	FALSE	-0.683158	0.201213	1.8914	-0.387705	-1.27612	0.35553	-0.101158
Zm00001eb046860	2213.21	-0.93433	0.190086	-4.9153	8.86454e-07	1.28264e-05	FALSE	1.08509	0.863968	1.18478	-1.04508	-0.975731	-0.62277	-0.490252
Zm00001eb189400	1524.62	-0.934239	0.231973	-4.02736	5.64072e-05	0.000474538	FALSE	0.620476	0.4246	0.470514	-1.39008	-1.37823	1.17264	0.080077
Zm00001eb234610	568.071	-0.933876	0.299463	-3.1185	0.00181771	0.00899501	FALSE	0.503863	0.534601	1.68739	-0.949451	-1.0835	0.039267	-0.732165
[truncated: 18,016 more rows]

## Sheet: SupplementaryTable6
Supplementary Table 6. Genes that had a reads per kilobase million (RPKM) value greater than 2 of B73, Mo17, and CML228 meiocytes aligned to the Mo17 v1 reference genome. Values shown for each sample were Z-scores, indicating levels of gene expression.
[truncated: 18,256 more rows]

[truncated: 1 more sheets: SupplementaryTable7]
